# Supplementary material for: Integrative Analysis of miRNAs and Their Targets Involved in Ray Floret Growth in Gerbera hybrida
Source: Int J Mol Sci. 2022 Jun 30;23(13):7296. doi: 10.3390/ijms23137296 (PMC9266715; doi:10.3390/ijms23137296)
Supplement: Supplementary file 1 [file ijms-23-07296-s001.zip › Supplementary Tables.xlsx]

## Sheet: Table S1
Supplementary Table S1. Conserved miRNAs in gerbera
miR family	miR name	miR sequence	length (nt)	genome ID	strand	start	end	hairpin length	CG%	hairpin energy
ghy-miR156	ghy-miR156	TGACAGAAGAGAGTGAGCATA	21	c43758.graph_c0	+	2699	2800	102	41.18	-53.9
ghy-miR160	ghy-miR160a	TGCCTGGCTCCCTGTATGCCA	21	c29278.graph_c0	+	583	663	81	60.49	-45.5
	ghy-miR160b	TGCCTGGCTCCCTGTATGCCATT	23	c29278.graph_c0	+	582	667	86	56.98	-48
	ghy-miR160c	TGCCTGGCTCCCTGTATGCCA	21	c29278.graph_c0	+	583	663	81	60.49	-45.5
	ghy-miR160d	TGCCTGGCTCCCTGTATGCCA	21	c29278.graph_c0	+	582	667	86	55.81	-48
	ghy-miR160e	TGCCTGGCTCCCTGTATGCCA	21	c29278.graph_c0	+	573	674	102	54.9	-48.2
ghy-miR162	ghy-miR162	CCGAUAAACCUCUGCAUCCAG	21	c50585.graph_c0	+	108	357	250	37.6	-64.4
ghy-miR164	ghy-miR164	UGGAGAAGCAGGGCACGUGCA	21	c2330.graph_c0	+	0	230	230	33.04	-62.2
ghy-miR166	ghy-miR166a	UCGGACCAGGCUUCAUUCCCC	21	c36554.graph_c0	-	407	656	223	43.5	-72.6
	ghy-miR166b	UCGGACCAGGCUUCAUUCCCC	21	c36554.graph_c0	-	312	561	250	40	-81.8
	ghy-miR166c	UCUCGGACCAGGCUUCAUUCU	21	c68248.graph_c0	+	100	349	250	32.8	-80.9
	ghy-miR166d	UUCGGACCAGGCUUCAUUCCC	21	c33502.graph_c0	-	708	957	191	39.79	-64.7
	ghy-miR166e	UCGGACCAGGCUUCAUUCCUC	21	c24807.graph_c0	+	0	233	233	45.06	-82.9
ghy-miR167	ghy-miR167	UGAAGCUGCCAGCAUGAUCUA	21	c33809.graph_c0	-	380	629	250	38	-72.6
ghy-miR168	ghy-miR168	UUGCUUGGUGCAGGUCGGGAA	21	c32938.graph_c0	+	50	299	250	43.6	-88.2
ghy-miR171	ghy-miR171a	UGAUUGAGCCGUGCCAAUAUC	21	c27062.graph_c0	+	36	285	250	36.8	-75.6
	ghy-miR171b	UGAUUGAGCCGUGCCAAUAUC	21	c27062.graph_c0	+	0	159	159	31.45	-51.9
ghy-miR172	ghy-miR172	AGAATCTTGATGATGCTGCAT	21	c47803.graph_c1	+	651	729	79	43.04	-35.7
ghy-miR319	ghy-miR319	UUGGACUGAAGGGAGCUCCCU	21	c63849.graph_c0	+	91	340	250	37.6	-91.2
ghy-miR390	ghy-miR390	AAGCUCAGGAGGGAUAGCGCC	21	c25169.graph_c0	+	36	285	250	36.4	-65.5
ghy-miR5368	ghy-miR5368	GGACAGTCTCAGGTAGACA	19	c46083.graph_c1	+	3173	3341	169	53.85	-68.3
ghy-miR6113	ghy-miR6113a	UCUGAAACUCAAGAACACGUCG	22	c45067.graph_c0	+	970	1219	250	38.8	-77.8
	ghy-miR6113b	UCUGAAACUCAAGAACACGUCG	22	c45067.graph_c0	+	1031	1280	250	37.2	-79.5
ghy-miR6118	ghy-miR6118	UUCCGAGGCCACCCAUUCCAAC	22	c14817.graph_c0	+	36	285	250	32.8	-78.3

## Sheet: Table S2
Supplementary Table S2. Novel miRNAs in gerbera
miR name	miR sequence	length (nt)	star sequence	genome ID	strand	start	end	pre sequence	hairpin length	hairpin structure	CG%	hairpin energy
ghy-miRn1	augguaacugguuugauauaaaac	24	uuuauuugaaccacauaccuau	c38792.graph_c0	+	531	780	uuuauuuaagauuuuauuaguuaugguaacugguuugauauaaaacgucaaauauuaugggugggaaugucauuugcucauuuaauuuucuauauaacuaucaucuuuauuuuucucauugucauaaauauguuugauuuuuaugugaauagggggaaaaaugagugggauggcauuauuccauugaagauauaauguuuuauuugaaccacauaccuauuuaauuuuuggucaugaguuuuuguacuac	250	...(((((.((((..(((((.((.((((..((((((((.(((((((((...(((((.(.((((((((((((((((((((((((..((((((((((((..((((....(((((.............)))))....))))..)))))).....)))))).)))))))).)))))))))..))))))).).))))).)))))))))))))))))..)))))).)))))....)))).)))))...........	26.4	-57.7
ghy-miRn2	uugugggucuuacaguguuuguga	24	acaaacaccgagccaccgag	c48887.graph_c1	-	128	377	uauauauauaaagaguugggaccaaucuuguaaaucaaaggacaauuauuaauagacauugauugauuuuagaaauauugcuuuuggugaaaaaaauacgauaacguguugaaaacaugaaagcgaacgaauuuauuucgaaaaauguuauacacucgggcuacucacaaacaccgagccaccgagggacucaaacugggaucuauugugggucuuacaguguuugugaauauuaggagaauauaacauu	250	......(((((.((.(((....))))))))))..((.((((.((((((...........)))))).)))).))....(((((((..(((.....((((((....)))))).....))).))))))).((((.....))))...(((((((((..(((....((.((((((((((.((.((((....(((((((...)))).)))...)))).)).....)))))))))).))....)))..)))))))))	33.2	-55
ghy-miRn3	auggacucgacuuuacuugacucg	24	agucaagucucgacuugguaa	c14459.graph_c0	-	0	220	uaucauuuauauauauaaaauuauggacucgacuuuacuugacucgacuaagcaaaaaccacgagucaagucucgacuugguaauuucuggaauuguaacugaacugucugauuaaaaagucaagccaagcugcuuggcucacccacuuugcgacuugggcuuucaacccuaauuuaaacuaauaacuacuaagggaaaaauguauuuuuagauugaaaa	220	..(((.(((((....(((((((((.((.((((....((((((((((...............)))))))))).)))).)).))))))).))....))))).))).(.((((((......((((((((......))))))))..((((..........)))).......((((.....................))))............)))))).)....	34.55	-46
ghy-miRn4	aaacucugaugauuggguaaucuc	24	gauuuuuccaauuauuuggguuuuu	c36179.graph_c0	+	339	588	uggcuuuuucuuaauaaaaaaaaaacucugaugauuggguaaucucaagaaaugaaccacgauauguuuuguuuggauuuuuccaauuauuuggguuuuuguuuggagacuaaggagggaguguaucauguuuguguaagaauauuuacaaauuugguacuuguacuaucauaa	174	..((((((((((..((((..((((((((.((((((((((.((((.((((....((((........))))..))))))))..)))))))))).)))))))).)))).......))))))))))((((((.(((((((..........))))))).))))))..............	29.89	-40.8
ghy-miRn5	aggucucguuugguaacacuuaca	24	uauccuuacaugacaucuua	c46608.graph_c1	+	0	126	acccucgauccaaauaccaaggcaguauccuuacaugacaucuuauuaugcuuauuuuugugcuuuaaaauugcauaaugaggucucguuugguaacacuuacauuuuuuuguuuucuguuugaca	126	..........((((((..(((((((((...((((((((.((((((((((((..(((((........))))).)))))))))))).))))...))))....))).......)))))).))))))...	33.33	-23.3
ghy-miRn6	aauguagauuugaugaaagauggg	24	uuucauuaaaucucuaug	c55030.graph_c0	-	221	470	cuugccaccugggagcagccccguaggauuagucacuugggcaaaaaaaagcucaaacggauacccacacuaacccaaaaaaauuaauaauaauaaauaaauggucaccuuuucauuaaaucucuaugugaguaucuaaaauagagauuuccugaaacuuggguggucaauuaauuuauaaaauguagauuugaugaaagaugggugaccauucaaauaucuuuu	225	.........((((......))))..((.(((((...((((((........))))))..((....))..)))))))........................(((((((((((((((((((((((((((..(((.(((((((.....((.....)).....))))))).)))..))...........).)))))))))))))...)))))))))))............	34.22	-50.4
ghy-miRn7	auacggcuaccucugcaaaacggc	24	uauuucugcaagccgauuu	c16829.graph_c0	-	219	468	agaagugaguaaagucaaagaaauacggcuaccucugcaaaacggcuacuucugcaaugcggcuauuucugcaagccgauuucuuugugcaaauugauuuuaacacucgauuaaacaguuguuaauuuaacagcuguuaauuccaaauugccuauaaaaagaaguuacucaaguucaaaauacaccuucacgaucacaucuauacgcauaaucacaccuucucgagcauauccaaacagaaaucucucac	250	.(((.(((((((...(((((((((.(((((.....(((((((.((((.(.........).)))).))).)))))))))))))))))).((((.(((............((...(((((((((((...)))))))))))...))))).)))).............)))))))..)))...............................................(((.((.((......)).)))))....	36.8	-45.6
ghy-miRn8	ucgccucugaagcuuaggaaua	22	uuucuaaguuugggggcuacg	c45067.graph_c0	+	215	464	acuacuauucuaacgcauaucgucgccucugaagcuuaggaauacguuguccaccguacggcuaccgucguuguuugguacgcgacguauuucuaaguuugggggcuacgauaaucguuaaugauaaucugucaucgagaucccucuguauggauucagaucauauucgauccuucauccgaaacgagguuugcucuuuagauuauuuaccgauugguaguucgaucaauuugaguauguuuaucuaugu	250	(((((((.(((((((..((((((.((((((.(((((((((((((((((((..((((.(((((.......))))).))))..))))))))))))))))))))))))).))))))..)))))..(((((((((.....(((...((((.((.(((((...((((......))))....)))))..))))))....)))..)))))))))....)).)))))))((((.....))))................	41.2	-84.4
ghy-miRn9	aauuggcaaggacgugugaaagac	24	cuuuuguuaguauuccuugcuauugua	c17258.graph_c1	+	0	136	gguuucuuuuguuaguauuccuugcuauuguauuugacaugaacguguugaccaaacauuacccauuucaaaaguacaaaaaaagguuguaauuggcaaggacgugugaaagacaccagucauauuuaucaaaucu	136	(((.((((((..((....(((((((((((((((((((.(((...(((((.....)))))....))).))))..))))))..............)))))))))..)).)))))).)))...................	33.82	-27.5
ghy-miRn10	auggacgaucucagugaagaaaua	24	uugcuucacugaugguugucguucc	c48682.graph_c3	+	745	994	guggucgccauugccgccagccuuguuggcgguacagguuucggguuuuucgcuccguugauagcaacuuuugaaguuguuggcacaaauccucaaaacaaauguuuacauugcuucacugaugguugucguuccacacuugaaggaaguugcacggugguucgagacuucaccgauuuuugcuuccauucauacuucuccuucauggacgaucucagugaagaaauacccgccggcgagaaacccaucg	250	...(..(((..((((((((((...))))))))))..)))..)((((((((((((.((.((.(((((((((...))))))))).))..........((((....))))......(((((((((.(((((((..........((((((((((....((((((.........))))))......)))))).))))...............)))))))))))))))).......))..))))))))))))....	48	-83.5
ghy-miRn11	auugagugacuuacaguuuuugau	24	caaaaaauuguaagucgaucagugu	c47943.graph_c1	+	2159	2408	gacuaacuauuuaaaaaguaaaauugagugacuuacaguuuuugauuuuuacaguuaauuaaucuccuucaauuucauuaaaaaaauaaacgaaaagaugacauggcaaucacguuacuauaaaaguccaauaucaucuaaaauuuuaacauugccacgucaucguuucauuaauuuuuaacaggauugacgguaucuuaagugugcaaaucaaaaaauuguaagucgaucaguguuagguuuuuaacac	250	..........(((((((.(((.(((((.((((((((((((((((((((.((((.((((.......((.(((((((..(((((((..(((..((((.((((((.(((((((...((((..((...((...........))...))..))))))))))).)))))).)))).))).)))))))..))))))).))....)))).)))).))))).))))))))))))))).))))).)))..)))))))...	27.6	-62.6
ghy-miRn12	acaaccggaggucugucaacgugu	24	auuagcccuccgauuuccucaacg	c12574.graph_c0	+	1071	1320	uaccauacaagaagcaugagguacaaccggaggucugucaacguguccauuuuugugaacacguauuagcccuccgauuuccucaacgacaagguuaugauuugaaugucguaaaugcguugaccuaugacuuaacgauauuccggccauuuugcucuuga	161	.......(((((.((((((((......((((((.(((...((((((.(((....))).))))))..))).))))))....)))))((......)).(((.((.(((((((((.((..(((......)))..)).))))))))).)).)))..)))))))).	42.86	-46.8
ghy-miRn13	uguguuccucuauaugaagca	21	ugcacauaggggaacuagauuc	c49465.graph_c0	+	1091	1340	uacaaaagcuuauuuaaaaguugaaaucaaauuuuagugcauagaggauauuuuuuucauguguagaacaaaaaugucagcuuaugcugcacauaggggaacuagauucaaguugacuuuaugcauuacacucaauccaugaaaagaguacuaacauaauuuuuggaauuucguuuugaaggaaguugagaacacuuuaucacuauuuguguuccucuauaugaagcaucaauaaguggcgauugacaac	250	..(((..(((.(((((.(((((((.............(((((((((((.....))))).))))))...........)))))))(((((.((.(((((((((((((((.....((((((((...((..((......((((.(((..(.((....)).)..))).)))).....))..))...))))))))...............))))).)))))))))).)).)))))...))))))))..))).....	31.6	-48.4
ghy-miRn14	aaucauccguccuguuaacaguac	24	guuguuaacagcacauaugauuuc	c43329.graph_c1	-	94	343	auuaaucaauaacuacacgggaaaucauccguccuguuaacaguaccuaacaucuguguuguuaacagcacauaugauuucuucauaacuauauuauauuuauuguuuaaauaauucuuucauuuuucaucuuacaaaauuaauauuuuaucuuuaaugacuuacaucguuuugggccgaaauaaaauguuacgauuguuuuuguuuauuaaaaauauaacauuuuuuaggccaaaaugugugauccgaa	250	.................(((((((((((..((.(((((((((((((.........))))))))))))).))..)))))))).((((((..(((..(((((..((((...........................))))....)))))..)))..)).)))).(((((.((((((((.((.....(((((((((....((((((((.....)))))))))))))))))...))))))))))))))).)))..	26	-51.1
ghy-miRn15	aaaugaugucauggcugucacaau	24	ugugacaagcaagacaauuugu	c19897.graph_c0	-	259	508	uuaugacagaaaauccgucgccaaaugaugucauggcugucacaauaaugucaaggcagucacauucgacgguuuaagcacuauuugugacaagcaagacaauuugugacguuuuuucacaucgacuagacugacuuuucuuguacugagaucgacauauaauuaguuacuauaugaugcauguuggcucaauucucuuguggguugaacauuucuauuuuuuauauugcaugaaaagaaguuacuauau	250	..(((...(((((..((((((.((((..((((.((..((((((((((.(((..((((.(((......))).))))..))).)).))))))))..)).))))))))))))))..))))).)))......((((..((((((.((((.((((.(((((((...((((.........))))..)))))))))))...(((....))).......................)))).)))))).)))).......	35.2	-58.1
ghy-miRn16	auuuuccgugcugucaacaacaca	24	agcagacggcacggaagauauccc	c49230.graph_c0	+	708	957	ucagaauuuugacaagggaauuugucauguggacuuguuuuuauuucuuuaauauguugguuuauuuauauaaaugagauauuuuccgugcugucaacaacacaaaaauuagguguaguaacacauuaaaaguuguacauuuuuaauaaauuuaaaaaaaaauuuaucacccuuuaaaauguacaauuuuuaaugcgcugcugcaucuaauguuggugcagcagacggcacggaagauauccccauauaa	250	.........(((((((....)))))))(((((((.((((...........)))).))(.((((((....)))))).)((((((((((((((((((..(..(((....(((((((((((((.(.((((((((((((((((((((..((((((((......))))))))........)))))))))))))))))))).).)))))))))))))....)))..)..)))))))))))))))))).)))))...	29.6	-84.7
ghy-miRn17	caggacuaggguacccuccuu	21	cuagggcacccucuuccuugu	c43060.graph_c0	-	585	834	cgcccucggcucugguucggaccaggacuaggguacccuccuuguccucgaccauaguuaggucuaggacuagggcacccucuuccuuguccaggaccaugguugggugcagaacuaggauagccucguccugggcuauugcuaaagugggguccuggacuaggacuaggauagccuaguucggaaccauggccuggguggcuagggcuaggguagccgccuaggccugggcuaggacuaggguggccga	250	.((.(((((((.((((((((((.((((..(((((.((((....(((((.((((.......)))).))))).)))).)))))..)))).)))).)))))).))))))).)).......((.((.(((.(((((((.(((........((((..(((.((((((((.(((...)))))))))))))).))))((((((((((((((.........))))))))))))))))).))))))).))).)).))..	59.6	-129.3
ghy-miRn18	aaaucuuccgugcugucaacagca	24	cuguuaauagcacggaagcuuucc	c46374.graph_c0	+	1408	1657	aaucaaauuuuuuuuuaaggggaaaucuuccgugcugucaacagcaggugcagcagggauauaauuguaauuuucaauccacuggggaagaaggguuaauugugguucuuauuucuaaagagguuggaaauuacaauuauaccccugcugcaccuaauguuggugcuguuaauagcacggaagcuuuccccuuuuuuuaaucauuaccuuuuuacaaacagaagauacuuugguuuguacuuuuuuauuc	250	................(((((((((.((((((((((((.(((((((((((((((((((.(((((((((((((((((((((..((((((..((((((((....)))))))).))))))..).)))))))))))))))))))).)))))))))))).........))))))).)))))))))))).)))))))))...................(((((((.((((...)))).)))))))...........	35.6	-106.8
ghy-miRn19	aaucggcuaugcuggagagacggc	24	cuucucacacccuagccaugacgauuug	c72502.graph_c0	-	85	334	cacuucuucgcccccgauguacaaagaccuucuuacgucguucugggagggggcucaucugucuagcuuuggauacauuagguccagaguucuacauaaacgugucuccaucuccgccaaaaccauaaacaccauucuucgccuuccucaacccgaaaccuucucacacccuagccaugacgauuugcgaaacaugcuucgcacaaucggcuaugcuggagagacggcacaacugggggacaucaauaag	250	..........(((((((((((...(((...))))))))).....((((((((((.....(((..((((((((((.......))))))))))..))).......)))))).)))).......................((((............)))).((.((((.....(((((.(((.(((((((((((......)))))).)))))..)))))))).)))).)).......)))))...........	50	-63.6
ghy-miRn20	agcgguuguuugaucuaugaaugu	24	ggacaugggguagugacggugguugg	c57905.graph_c0	+	514	763	uugccggagguugaaaguguugagcgguuguuugaucuaugaauguuguggggugaggagucacacuacaauggacaugggguagugacggugguuggggcaaca	105	(((((.................(((.((((((...((((((..((((((((.((((....)))).))))))))..)))))).....)))))).)))..)))))..	50.48	-27
ghy-miRn21	aaugcaugucgggauaaaaucgga	24	uuuugucucgauguacguuacuag	c32848.graph_c0	-	163	412	augcauuacuacugacgauaucauccauuuuaaucuaauaggaaauuguccuaauaugcaauaauagaaaaaaaaaaaaaugcaaguuugacuuauauggucaaagauuuccuucacaaauucaaaauguuuagaucuagagggccggccaaaaugaucccgauuuugucucgauguacguuacuaguaaaauaauuuacaaguaaugcaugucgggauaaaaucggaaucauuuugcucgggauuuuua	250	.(((((.......((((((....((((((.......))).))).)))))).....)))))..........................(((((((.....))))))).....(((((........................)))))((((.(((((((((.((((((((((((((((((.(((((((.(((((....))))).))))))).)))))))))))))))))).))))))))).))))........	31.6	-72.1
ghy-miRn22	uuacuccaccacuuuucagcc	21	ccgaaaaguugugaaguaaua	c46833.graph_c0	-	755	1004	gugagcugcaaauuuuuuugaaacaauugcggugaaaauguacgauucauguaacaauauuauuugauuuucgugacauaccgggggagauguacccauuggcgaucauguggguaugaacaucagcucucucgaucugucaaggccgaaaaguugugaaguaauauuacguauggcaacacaagcgugucuuuggcauacguaauauuacuccaccacuuuucagccuuaacagauacgagagaaguga	250	....((((((((....))))......((.((((....((((((((.(((.((((.....)))).)))...)))).)))))))).))....(((((((((((.....)).))))))))).....))))(((((((((((((.(((((.(((((((.(((.((((((((((((((((.((((((....))))...)).)))))))))))))))).))).))))))).))))).)))))).))))))).....	40.4	-95.7
ghy-miRn23	uugaaauguuauaaacaaugac	22	uuuguuuauacauuucaggg	c34371.graph_c0	-	575	824	ccucggcccuccaucgauuuucuaauuguaaguuucaaucuccauucuaggguuuuuaugauucaauuaugguauuuagauuagucuagccugccauggaugauguguuugaucaauugcacguuugaaagcaccgucuuuguuuauacauuucagggaaacagaguucaucuauacaacuucggaaaugaacaugaauuuuuucuuugaaauguuauaaacaaugaccgugcuuuuaguaucgucggcu	250	..........((..((((.....(((((((((....(((((........))))))))))))))((.((((((((.(((((....)))))..)))))))).))((((((..........))))))((((((((((.(((.((((((((((((((((((((((..((((((((.........((((....)))).))))))))))))))))))))).))))))))).))).)))))))))).))))..))..	36	-67
ghy-miRn24	aucaugcgaucucucuggaag	21	uccauccauguccgcaucgaucc	c49514.graph_c0	-	2288	2537	gaucgaguuuauaauuuggaucaugcgaucucucuggaaguuuccauccauguccgcaucgauccauccuucaucgcaccugcuuucuagcuucaauucgacuucaaagcucugugcgacuugcaaagucguguucaugauaaacaugacugugcacaugaugcacacgcccgugcucauaaugaacacgcccgcacugaugaucaugcacgcccgugcucuuaguuucuuugcacacucguguucaaga	250	................(((((((((((..(....((((....)))).....)..))))).)))))).......((((((..(((((..(((........).))..)))))...))))))..((((.(((((((((.......))))))))).)))).((((.((((......))))))))..((((((((...(((..((.......((((....))))........))..))).....))))))))...	47.2	-72.8
ghy-miRn25	auuuuauuugggacuaagacuuug	24	uuaucuaguuccaaaagaaauaa	c28913.graph_c0	+	613	862	auaauccauguaaccaaccuuuauuuuauuugggacuaagacuuuguuguuguaaauuuuuaugcauuaaaaucauuauuguagguuaucguuuuuuuacaauuacgugacugaaauauuuuuuuuaguugugauggaauggcuguuuguuuuuuguaauccagugauuguuguuuacuuuuaaaaaucuaacgugacauuaucuaguuccaaaagaaauaaagauugucuagauaauguuaauaaacaa	250	.......((.((..(((.(((((((((.((((((((((.((...((((((((...(((((((........(((.(((((((..((((((((((((.(((((........(((((((......)))))))))))).))))))..............))))))))))))).))).........))))))).))))..))))...)))))))))))).))))))))).)))..)).))..((((....)))).	25.6	-44.9
ghy-miRn26	agaugucgucggaugagcuguaug	24	auggagucaacugaaauuauugcg	c45084.graph_c0	-	897	1146	gaauccagucccugaagaagaaguuuuauuuucacuuucaagauuaugucgauuugauuauauggaagguacaauucuuggacaggcaucacuuacuaauuaaguuugggaguguugauggagcgguaucacgaaaugcugauaaccacccagcauuuuuugcuguauauaacauggagucaacugaaauuauugcguuuuaucagaugucgucggaugagcuguauguguuguuugaacaguucuguga	250	...(((((..((((...(((((....(((((((.(......(((((........)))))....))))))))...)))))...))))...(((((.((((......))))))))).(((((......))))).(((((((((.........)))))))))..((((((((..(((((.(((((.((((...((((...........))))...)))).))).)).)))))..)))....))))).))).))	37.6	-53.2
ghy-miRn27	acgaacuuuaaauaauuugaauaa	24	auuauuuaaagucugaugccuu	c49081.graph_c0	+	1700	1949	ugguaaacuuuuaaauaugauaacgaacuuuaaauaauuugaauaaagucaacauacuaucauuauuuuaagauaauuugcucaugugacacgaguguaacagucaaauuauccuaagauaacaauuuuaaaaaguacguucccuuuauuuagauuauuuaaagucugaugccuuguuuauaaguucgacaaaaauacguuguuaauacguaauauuaaccuacguuauucuaggcaacuuucauuucug	250	..((.(((((.((((((.(.((.((.((((((((((((((((((((((..(((.((((((..((((((((.(((((((((....(((.(((....))).)))..))))))))).))))))))..)).......)))).)))..)))))))))))))))))))))).)).)).).)))))).)))))..))......((((.(((((((.....)))))))..))))........................	26.4	-54.8
ghy-miRn28	augacggcgauugugcgauucaga	24	ggcgauugugcgauuuagggccga	c48310.graph_c0	-	0	111	gauuuagcgauucaggccgacaaugacggcgauugugcgauucagaggccggcgauugugcgauuuagggccgaucaggaauggaugaacagggcgagaacgggagaacga	111	......((..((((..(((....(((((((((((((((((((..(....)...))))))))))))....)))).)))....))).))))....)).....((......)).	54.95	-24.8
ghy-miRn29	aaaauaucugcggguaacgaguac	24	acccauacacccgcggauaucccca	c59030.graph_c0	+	319	568	cggauaaaacaaguacuuuuuaaaaauaucugcggguaacgaguacaagacccuaccuauacccauacacccgcggauauccccaugcuuuuuuu	95	.........................((((((((((((...(.(((..((.......)).))).)....))))))))))))...............	41.05	-18.2
ghy-miRn30	aaugaugugauugauaugauugug	24	auaaguaugugauucauaaaccuu	c47168.graph_c1	-	3017	3266	uauuggauuaaaaucggcaggaaaugaugugauugauaugauugugaagauauaaguaugugauucauaaaccuuuuuguucgaauaucuaauugaaaaagugcuaagguacaauaacgucuuugucuuugugcuuuuuuggucaaaguuuguguauguauauuauccuauccuaugaaaauuguaacguuugacuuggcauauaguugaaguaaagccuuugacuauuugucaacuauuuaaaaugccc	250	.(((((((.....((((((((((....(((((.(.(((((.(((((....))))).))))).).)))))....)))))).))))..))))))).((((((((((.((((.((((........)))))))))))))))))).(((((((((........((((...........))))........))).))))))((((((.((((((((((......)))))))))).))))))...............	30.4	-52.4
ghy-miRn31	auaaggacuauugggcuugagacc	24	uuuuaggccgaucuuuuuua	c40246.graph_c0	-	2172	2421	uaaaaaaauaauggaacugauaaggacuauugggcuugagaccagacuaagaccgauuuuuuuaggccgaucuuuuuuauuuaaauuuuauuuuuuaacugauuuuuuuauuauacaaguuuaagucuaucaucuuaugaacauauaggacaaaucuuccucuuuuucuauaaacaaacgugagcuagcacaaaagaugugaacgcgucaauacaaaauauguucucuauucagucgacacaucagucga	250	..(((((((((.......((((((((....(.(((((((((..................))))))))).)...))))))))......)))))))))..((((...................((((........)))).((((((((((((.......))))...................(((((...((((.....))))...)).))).......)))))))).....))))(((((......)))))	30.4	-37.8
ghy-miRn32	uucggcaccaugacagauccag	22	uggucugucaugguguugaag	c50358.graph_c0	+	388	637	gaacaguuuuaauugcuuauucuucggcaccaugacagauccagacuuuaauuugaaaauccguaucugucuuggugucaaagucuggucugucaugguguugaagaauaagcaaugaggcguuuggguugaucguagacagcugcccgucucaugcugcucaaugcucaaucucuucggaugcacucagaucuaacaauuguuacucuaagaugguaucagagcuucaucuuuaaugagaucugcucaa	250	((((.((((((.(((((((((((((((((((((((((((.((((((((.....(((....(((.........)))..))))))))))))))))))))))))))))))))))))))))))))))))(((((((.(((.((((((............)))).)).))).))))))).....(((((.((.(((..((((....)))).))).))...))))).((((...(((((....)))))..))))..	41.6	-96
ghy-miRn33	aaugaauuugauucugaaugauuc	24	aaugauuuagcgcuuaaugauuc	c45816.graph_c1	-	263	512	aucagagauuacuucuguuuuaacggaugaacuugguuuuggaaaaagguuuuuaaacuuuaaaaaacuuaaaauaagucauaaauaaugggguaugucagcaacuaacacaagcaucuuaggacauuaagaaucauuuguugccgaaugauuuagcgcuuaaugauucaaagguucagagauuaaaaugaauaagagguuuugaaugaauuugauucugaaugauucggauuguuugauaauuguucua	250	..(((((.....))))).......(((((..((((((((((.....((((((((........)))))))).......(.((((..........)))).)..)))..))).)))))))))(((((((......((((.......((((((.((((((...((((..((((((((.(((..................))).))))))))....))))..)))))).))))))......))))...)))))))	29.6	-43.2
ghy-miRn34	auuuuauguguauggaucaaaauc	24	auuuugauuuauacacauaaaauu	c49466.graph_c1	-	294	543	acggcgagcacgaugaugaauuuuaaagggacuguuuagauuuaaaaaguuugaauuuguaacuuguuuugaccgauaggaguuaauuuuuccgcggaacauuuugauuuauacacauaaaauuuuuguuuaaagacaauaauaccuuuagcauuauucuauuagacaugaugggccacauauuaauuaaggguaguauuguauauuuuauguguauggaucaaaaucuucuguguaaaaaucaccaccc	250	.(((((((.((((..((((((((.....(((((.((((....)))).)))))))))))))...)))))))).)))...((.....((((((.(((((((.(((((((((((((((((((((((............((((((.(((((((((...((((((((((....)))))))....)))....))))))))).))))))..))))))))))))))))))))))).))))))).)))))).....)).	30.4	-66.1
ghy-miRn35	aagacugcuggagcaaagaaaagc	24	uuuucaaauucagggggaguca	c47438.graph_c0	-	3118	3367	agcucauggggucccuacaagcccaugaagcaagaaucaacagaaccucauucaaagaagaggagaaugcuuuucaaauucagggggagucaucuaaguuccugggaaaucguggcagaggcagagguggauuuagaggaagaggacgaggaagaaugaguccuguccagugugcacacugcagaaaauuugggcacaaagaagaagacugcuggagcaaagaaaagcagguucaauauacagaagaacc	250	.(((((((((...........)))))).)))..............((((.(((...)))))))....((((((((...(((((.((...((.(((..((.((((((...((...((((.((((.(..(((((..........(((((..(......)..)))))))))).).))).).)))).))...)))))).))..))).))...)).))))).....))))))))(((((...........)))))	46.4	-68.6
ghy-miRn36	auuuacccggguugucucuugcca	24	cagucccgugggauuagucgu	c491.graph_c0	+	103	352	ggagggaaggcauaggcccccuauuuacccggguugucucuugccaucuaagagcagucccgugggauuagucguugggcaaagcccaaacagaaacccauguuaacccaaaaaccaaggaugaaaacauuuguugucuaucuuuugaacauacucuugguaauucauagacacucaagcccucuaauuuguuauuugguaacauuuacauucucuauuuuuuguuucaaaaaauuuauaauguugacag	250	((((((..(((....)))..(((....(((((((((.((((((.....))))))))).)))).))...)))...((((((...)))))).......((...(((........)))...)).........((((.((((((.....((((..((((...)))).))))))))))..))))))))))....((((((...))))))...(((((....((((((((...))))))))....)))))......	39.2	-58.3
ghy-miRn37	auaaccccucuacuugucacaagu	24	uucucauaaguaaaguguuauuuu	c18452.graph_c0	+	136	385	cuacaugucaaauauuuaucaaauaaccccucuacuugucacaaguguaugaaaccaaccaucauuguaggaaaaaaaaauuggcaugaugguugguuugauacucuucucauaaguaaaguguuauuuugauacacuuuugaaaacuaaaggguuuaauugagauuuuaucaacuaugaaugucacuuugaugcaaacuagugaaaaguacgauaguuaaaaacguaauucacucaaaauuaacauucu	250	.......(((((....(((((((((((..((.(((((((...(((.((((.((((((((((((((.((...............)))))))))))))))).)))).)))...))))))).)).)))).)))))))....)))))(((((....)))))..((((.......))))....((((((...(((((.........(((((...((((...........)))).))))))))))....)))))).	29.6	-58
ghy-miRn38	agaccuggacacuguagacguuug	24	auuguuuuagucgaccuccaggucgaa	c19020.graph_c0	+	0	246	ggaagauaucccauuuucuaauuauacauuuaaauuaaaaaauauuauuaaucauaaguuuauguuuugauuaauuuaaaaauuuugccaucaaacuuaaaauuauuuaugguuuagacaauuguuuuagucgaccuccaggucgaaugccuaggaaugggugcguggucagucucuuuugaauguaccuuaaacguguaagaccuggacacuguagacguuugucaaaauagagggauguacuuc	246	.(((((((((((....((((........(((((((((((((((((................)))))))..))))))))))......(((((.................)))))...(((((.(((((((((.(...((((((((..((((...(....((((((((..((((......))))))))))))....)))))..))))))))))))).))))).)))))....))))))))))).))))	31.3	-58.1
ghy-miRn39	acuuccggaacucgaauauauuga	24	aacguguuuuugugagagaagcuc	c48951.graph_c0	+	1166	1415	gguaucuuucauugaugcucuaacuuccggaacucgaauauauugaagcaucucaacguguuuuugugagagaagcucaaacgagacaaucuugcgcacuuuucgccaguaauccccauauggacugagcccaaacgcggcauaguuauaggucaugagcucugcuaccacugacuuggguuuacuggcaaacgccuugucauuggugguaaaacacucuuuagccaaugugcuauugcucaccaccaaa	250	((((((.......))))))....(((((...((..((((((.((((......)))).))))))..))..).)))).........(((((....(((....(((.((((((((.(((......(((((.((((....).))).)))))..(((((((((((...)))..)).))))))))).)))))))))))))).))))).((((((((........(..((((......))))..)...)))))))).	44.8	-63.9
ghy-miRn40	aagguuuggagaaccguaggguuu	24	gccuauugucauccaauaguuga	c32961.graph_c0	-	0	240	guuagauauguugaaagaacacacaaaaauaaacaucauacuuauuaaauugucuauuuucacgcauuuaugccaacuagauuuuuuuuuuugaguuaaacgcaaaaaaacccuuguacuuugccuuuuuguuuuaaaaaacaauaguugaaaaaaugcacaaaaagccuauugucauccaauaguugagauuuuggaaaucacaagguuuggagaaccguaggguuuuuugugcauuuu	240	.......((((((((((...(((....(((((.........)))))....)))...)))))).))))......((((((.......(((((((((.((((.(((((.............)))))...)))).)))))))))...))))))..((((((((((((((((((((.((..(((((...(((.(((((...))))).)))...)))))..)).))).)))))))))))))))))	29.17	-51.3
ghy-miRn41	agugggguuaaauuugaugacgug	24	caaauuuaaccccacuaacaaa	c46137.graph_c0	+	2569	2818	cuuuuucuguuaagucuuuguuagugggguuaaauuugaugacgugggugaccacaucagcaugccacgacagcgagucacuaaagucagcaaccaacaaguacgucauguuagcaaauuuaaccccacuaacaaa	136	................(((((((((((((((((((((((((((((((.((((.......((.(((.......))).)).......)))).)..........)))))))).....))))))))))))))))))))))	41.91	-45.3
ghy-miRn42	augacuauuuuagacuacgacugu	24	acuaguagucaaaaauugucauuu	c46169.graph_c1	+	2536	2785	gguuuacgcuuaaaaaaguguacauuccauuuuuaguucuuagacuuguacucaauuugcaaguuuagucaauuuagucuuuuuguuacacuaguagucaaaaauugucauuuuguuagacucguaguccaaaccucaacaaaaacaagucauuuauggcccccuagacucuugcucaauauguuuuggacuaagaaugcgauaaaugacuauuuuagacuacgacuguaauaaaaaagaaucaauggac	250	....(((((((....)))))))...((((((....(((((((((((((((.......))))))))))............(((((((((((...((((((.(((((.(((((((.(((..(.((.(((((((((...((.......((((...((((.((...))))))..)))).......)).))))))))).)).)..)))))))))).))))).))))))...)))))))))))))))).)))))).	32.4	-61.6
ghy-miRn43	auaaaagagucuguuguuuac	21	agacaucagauucuuuugugc	c48107.graph_c1	-	2840	3089	uuaauguugaugaauguuuuuauugauuuggaauuucauuacacaaacaauuuguuugguaauuuuagugcuuaagaagcuaaauucgcagcuuaguaugaagauccuugaaacaauggcuucuacagaugaucuuaaauaaugccacacuuacugaguagacaucagauucuuuugugcuaugcgaauauguuguuugcggcuuugauaaaagagucuguuguuuacucauuuguugugucauauauuu	250	.....(((((((((....)))))))))..........(((((.((((((...)))))))))))....(((((.(((..((.......))..)))))))).((((((((.(((........)))...))..))))))((((((((.((((.....((((((((((.(((((((((((((....((((((((...))))))))......))))))))))))).)))))))))).....)))).))).)))))	31.2	-62.9
ghy-miRn44	uuacuccaccacuuuucagcc	21	ccgaaaaguugugaaguaaua	c46833.graph_c0	-	674	923	cgggggagauguacccauuggcgaucauguggguaugaacaucagcucucucgaucugucaaggccgaaaaguugugaaguaauauuacguauggcaacacaagcgugucuuuggcauacguaauauuacuccaccacuuuucagccuuaacagauacgagagaagugauguuuaugcccacaugaucgucgauugcuacaucucgaucccaguucgaguuccaucgccauuggcauuagcucuaggauu	250	.((((((((((((.(.((((((((((((((((((((((((((((..(((((((((((((.(((((.(((((((.(((.((((((((((((((((.((((((....))))...)).)))))))))))))))).))).))))))).))))).)))))).)))))))..)))))))))))))))))))))))))))).).))))))))..)))).(((((((((.....(((...)))...)))))..)))).	45.6	-139.8
ghy-miRn45	acauuguuugugaguguagacacg	24	ucuacacuuauaaacgaccggggucuc	c46997.graph_c0	+	543	792	uuaaaaggaaaucaacuauuuguacaauuauuaacgcauaguguacaaacacuuaaaagaaaaaagaggagaacaaccguaucuaauagauaaaugauacacaugacuaaugaauaugcuuaauaaacaugucuacacuuauaaacgaccggggucucacauuaggacuuauaauauuuauugauguaagucucacauuguuugugaguguagacacguuuauuaaacauauuuauuagguacguauauu	250	................(((.(((((..............(((((....)))))..............((.......))(((((............)))))......((((((((((((.(((((((((.(((((((((((((((((((...(((.((.(((((((...............))))))).)).)))...))))))))))))))))))).))))))))).))))))))))))))))).)))..	28.8	-69.4
ghy-miRn46	auuauaucucugcugcaccuaaug	24	cauuacguaacaggauuauaauug	c48595.graph_c0	-	1243	1492	ucgacaccacauaacgcgguacacguguacaucuuuugacuuuuaugucgccggaggagauccucuccggcaucuuaauuccucauuuucaacguuguuuuuaauaaugcauuacguaacaggauuauaauuguaauuucuaaccuuuuuagaaauaaauggauauugugauuuauauguuuaaauggauuaaaaauuauaauuauaucucugcugcaccuaauguugacaauacauaaaauuuucccaa	250	((((((.......(((((.....))))).........(((......)))((((((((......)))))))).....................(((((((...)))))))......(((.((((..((((((((((((((.(((((..((((((.((((((.(......).))))))...)))))).)).))).))))))))))))))..)))).)))......)))))).....................	31.6	-53.8
ghy-miRn47	auggacauuuuuguugacguggaa	24	uuaagucaauaaagaugucuauuu	c48141.graph_c0	+	107	356	gauuugccauucuacauggacauuuuuguugacguggaauaccacuuggacauaauuuacagaaauuaaaucuuuuaucaauuuuuuuuuuuuuuacagaaaucaauuguauuaacaacuaggaauguuuaaaaauuucauuaaaauuaauugaaagauuugauuuacaugaauuuuguucaugugacauguuaagucaauaaagaugucuauuuuggauguuaaugcauuuccauuaaaaaaaauaaua	250	((..((((((((...((((((((((((((((((....((((.(((.((((((.((((((...(((((((((((((((..((((((...(((((..(((........((((....)))).......)))..))))).......))))))...)))))))))))))))...)))))).)))))).)))...))))..))))))))))))))))))...))))).....)))..)).................	23.2	-60.9
ghy-miRn48	auagaccccaucaaacuuaccauu	24	aaguuugauagacacuguagguuu	c54954.graph_c0	+	49	298	gcaaacuuuauagaguaaacuuauagaccccaucaaacuuaccauuuaguuacgugucauggugggucccaccuuaaucuguagacacauaagacauuaauacaugagacccaccaugacacauaaccaaaugguaaguuugauagacacuguagguuuauucaacuuuauauaguuuacaguguacgguguaauuuauugucaacagaucuacgugugucaguugacaaugauaccagagacaaucugu	250	..(((((.((((((((((((((((((...(.((((((((((((((((.((((.(((((((((((((((.((..(((((((...........)))..))))....)).))))))))))))))).)))).)))))))))))))))).)...)))))))))).....)))))))).)))))(((((((..(((((....((((((((((.(((........))).)))))))))))))))....)))..))))	36.4	-93.8
ghy-miRn49	gggagacugucucuggacguuggc	24	cgacgcugaggagaagugggcagu	c49989.graph_c0	-	448	697	ggagacugcaaggggauuagggagacugucucuggacguuggcggugguggucgccgacgcugaggagaagugggcaguggugguggucguuugggagaagagggugacaaagguguccauugaagacaaagauggguuucagauuugaagaggcacuuuuuguuuuuuguguuuuuucucuuuuuauuuaauuauuuauuuuaaagagaauaaaaaaacuaaaaaauauaaaaugacuaaacuuuccgu	250	(((((((((...............(((.(((((((.(((((((((......)))))))))))..))))))))..)))))(((..((((((((((((((((((((..((((....))))(((.(((((((((((.(.(((((.........))))).)))))))))))).))))))))))))))............((((((((....))))))))................))))))))).)))))))..	40.4	-60.4
ghy-miRn50	uaccuuggugcaugcuuuuugc	22	aaaaacacaaccgaaaggugug	c40532.graph_c0	+	871	1120	aucauaaaccaaccacaaacacccauaaagaguuuaauaauguaaucaacaaaaaaaaaaaaaaaaguuggucugcuaaaagaaaaaaggauuuucaaauuuaaaaaauaaaguuacaauauuucgcacaaaucuaccuuucugcagguaggguuauagaaccuugguuuguaagguaaaaacacaaccgaaaggugugaaaugauuaccuuggugcaugcuuuuugcc	229	...(((((((((...................((..((((.((((((((((................)))).(((......))).............................)))))).))))..))......((((((......))))))((((....)))))))))))))..((((((((((..((((..(((((.........)))))))))...)).))))))))	31	-38.3
ghy-miRn51	uuaucacuuacacacacucau	21	ugaguguguggaggugauacu	c41154.graph_c0	-	101	350	guuuagccuuuucugcaauaaauuaauauaucauugaugaauuuauguggucaguacaugauacuguuuugaauauacauaguuaaagauauuuaaaacuguuagcuacuuguauugugucuccucgcgaagaaaugugauauuaaauagaugaguguguggaggugauacugagaacuuauagauaugaucuuuuauaaguucucauuaucacuuacacacacucauccguuuagcaaagacaagguuc	250	....(((((...(((((.((((((....((((...))))))))))))))).(((((((....((.(((((((((((............))))))))))).))........)))))))(((((..((((........))))..((((((.((((((((((((..(((((((.((((((((((((((........)))))))))))))).)))))))..)))))))))))).))))))...)))))))))).	31.2	-79.3
ghy-miRn52	aaaugauggcugugugaaauacac	24	ggaucacucagccaaccuuucc	c42416.graph_c0	+	1059	1308	auauauacauaauauauaagggaaaugauggcugugugaaauacacaaccaucuuagcugugugaaacguauacugguaccgguauacccuacguuuauauacugauuuuucuaugcuuaucugguuuuuaauuuagaauguauauagguacuaguauacauuuaaaacacagucaaccuugguuauggaucacucagccaaccuuuccccuaauauauauauaucaacccagaagcuaauagagguuuc	250	(((((((.....(((((..((((((.(.((((((.((((....((.(((((.....(((((((.(((.(((((((((((((.((((((.(((.(((.....((((((............))).)))....))).)))...)))))).))))))))))))).)))...)))))))......))))).))..)))).)))))).).))))))...)))))))))))).......((((((......))))))	33.2	-74.2
ghy-miRn53	agaauaccguuuggcuagagcuug	24	agauuuuagacaaacggcauaaagc	c59860.graph_c0	-	314	563	uaugaaaccgaaagggggauaucguuuauucuuagccaagauuuuagacaaacggcauaaagcugaaaggagaauaccguuuggcuagagcuuggaaaaucgauaugaaaccgaaa	116	.............((...((((((...........(((((.((((((.(((((((.......((....))......))))))).))))))))))).....))))))....))....	38.79	-26
ghy-miRn54	uuuaaaugauuguacuguguguau	24	gcauacaguacaaacauuuaaagc	c42109.graph_c0	+	15	264	aguuauuuuugguuguauucuguuuuaaaugauuguacuguguguauuggaaauuguacuguguuuuuucuauuuuuauucaaaucuagguacaauuuucaaugcauacaguacaaacauuuaaagcaguauauagccaaaaaugauuguauccaaccuauagcaaucguuuccccguauauaauuuuauuuuuauguuagaacauuuauggaguuauuuuuguuuuaauaauuuuuuacggauuauuuu	250	((((((((((((((((((.((((((((((((.((((((((((((((((((((((((((((..(.(((...((....))...))).)..)))))))))))))))))))))))))))).)))))))))))).))))))))))))))))))..........................(((((...(((..........((((((((((...(((....)))...)))))))))))))...)))))........	24.8	-84.5
ghy-miRn55	aaauuuaaggaggcugugcacagg	24	ugagcaagaaucuggguuuuu	c47671.graph_c1	+	217	466	ccaauuccucgaagaggagaaauuuaaggaggcugugcacaggcuugagcaagaaucuggguuuuucuuuaauauuaaauauuuugaggagaaaguucaugccggugaaugggaugaaguugaaaaauaccuaucuggauacaccaagguugaugauaacagauacucaaugaagauuuucuucgaaaucaggaagcaaaaguaucuugaagcucuugauaagcaagauagggcaaaggcuguugagaua	250	....(((((((((((((((((((((..(((..((.(((.((....)).)))))..)))))))))))))))............))))))))).((.(((((.(((.....))).))))).))..........((((((....((.((....)).))....))))))(((((((((((...)))))....((((((.((....)).))))))...(((((.....)))))...(((....)))))))))...	38	-58.8
ghy-miRn56	aauccgucgguaauuauuugaauu	24	uucaaauaauugccaacagauuau	c42019.graph_c0	+	0	217	acaauucgucgguaacggugugaaugcaccgacggauuauugacgaauuauuuuuaaaaaagaaaaaaauaaaaauaaauaauccauugcuaauccaucgguaaauucaaauaauugccaacagauuauuuaaagcaauaaaaaaauaaaaauaauaaauaaaccguugguaauccgucgguaauuauuugaauuuaccgacggauauuuaaaaaau	217	...((((((((((((((((((....)))))).....))))))))))))((((((((.............))))))))...............((((.((((((((((((((((((((((.((.(((((((......................................))))))).)).)))))))))))))))))))))).))))...........	26.73	-61.85
ghy-miRn57	acauuuuuuuguugacgugacaug	24	uaccaugucaacaaaaaaauuuc	c33239.graph_c0	+	91	340	acacacuuggcauucuauuugaacauuuuuuuguugacgugacaugcaacauggacaaauuuacaaaaaucaguuuuuuuaauuuuguuuuuuauuauuccucguguacauuuuaauugcuucugaaaaaaaugauuuccguaaacuuuguccaugugauauaccaugucaacaaaaaaauuucauguaggaugucacguguacauuuccauuaaaaauuuaacaa	226	..((((.(((((((((((.((((.(((((((((((((((((..(((..((((((((((((((((..((((((.((((((((..........................................)))))))).))))))..))))).)))))))))))..)))..))))))))))))))))))))).))))))))))).))))........................	27.88	-69.54
ghy-miRn58	aaaaccgaaccggauuugcucacc	24	aaagcugguccuguuuuucgguuuuuu	c36956.graph_c0	+	339	588	ccggaucgauccggaccgacccaacccgcaccgaaaaccgaaacccguccaaaccgaaaccagaaauuuugguuuaaaccgguuuuguaauccccccccccucuuccccccuucuuauuuuuuuuaacaaaauguuuaaaaccggacuagaccagaaauugaaaaccgaaaaccggaaagcugguccuguuuuucgguuuuuuaaaaaccgaaccggauuugcucacccuuaguuucggcaucugaguuu	250	.(((.(((...(((..((........))..))).....)))...))).........((((((((..((((((((((..(((((((((.................................................)))))))))..))))))))))........((((((...((..(((.(((((.((...((((((((...)))))))))).))))).)))..)).....))))))..)))).))))	45.6	-57.38
ghy-miRn59	aaugcuauagauguugacaagugu	24	acacuugucaauaucuaagugaac	c15550.graph_c0	-	195	444	uguccucaaaccauccacuuuugguaaugcucguuucuuuuaugagaaauauuauauccucguaauaaagugaacauaacgucauucuaauaacaaguguguaacacuugucaauaucuaagugaacaaauccaaaaaaaugcuauagauguugacaagugucaaaaucuuauuaguaagagga	184	..(((((..((((........))))....(((((.......)))))...((((((......)))))).(((((........)))))(((((((......((..((((((((((((((((((((..................))).))))))))))))))))))).....)))))))...)))))	30.98	-44.9
ghy-miRn60	auuuuccgugcugucaacaacaca	24	agcagacggcacggaagauauccc	c49230.graph_c0	+	769	1018	uuauuuauauaaaugagauauuuuccgugcugucaacaacacaaaaauuagguguaguaacacauuaaaaguuguacauuuuuaauaaauuuaaaaaaaaauuuaucacccuuuaaaauguacaauuuuuaaugcgcugcugcaucuaauguuggugcagcagacggcacggaagauauccccauauaauauaauguguuaaguuguuuaacugcuaacaaaaaaauuuuaaauacuuuuuaaauaaaga	250	....((((((..(((.((((((((((((((((((..(..(((....(((((((((((((.(.((((((((((((((((((((..((((((((......))))))))........)))))))))))))))))))).).)))))))))))))....)))..)..))))))))))))))))))..)))...))))))..(((((((((....))))..)))))...............((((......)))).	26.4	-79.5
ghy-miRn61	agacugaaauugacgaugaucuuc	24	agaucauguuaaugggcagcaua	c46157.graph_c0	+	0	152	augaagaaagaugaaguuuaugauauucgaaaagaauauggaguucaugaugaucuugauguucauguguuagagaugaaagaucauguuaaugggcagcauaaaaagacugaaauugacgaugaucuuccacaaaaauacgaaguugauga	152	(((((..(((((.(...((((((.((((.(........).))))))))))).)))))....)))))(((((...(.((.((((((((((((((...((((.......).)))..)))))).)))))))).)))...)))))...........	32.24	-30
ghy-miRn62	aaggcaacgaacuuuaaauaauuu	24	auuauguaaaguucguugcuuuau	c45975.graph_c0	-	2917	3166	auuaaaaauaggguuaaugucacguguauuagcaacguacuuuuaacaaacuuucaaggcaacgaacuuuaaauaauuuaaaagcaacauacauuuuagaaucguuacuucacgauaaucugauugccacucaagcgccacaaaagcaaauuaucuuaaaauaacgcuuuuagaaaguacguuggcuuuauucagauuauguaaaguucguugcuuuauuuagaaguuuggcaaaaauauguuguuaaua	250	..........................(((((((((((((.((((..((((((((.((((((((((((((((.(((((((.((((((((.(((.((((((((.(((((......((((((....((((..................))))))))))......))))).)))))))).))).))).)))))....))))))).)))))))))))))))).....))))))))..)))).)))))))))))))	29.6	-68.1
ghy-miRn63	acgacuguugaaaaagccauuugc	24	acugacuuuuucaaccaucguacu	c34940.graph_c0	+	59	308	ugaaauggguuuucaaaauucuaaaaguuaggguaaagaacaguuauuggugcuucuuuguuugauacgcucuucucuugauaaauguuucuuguuaaauauucaagcaacugacuuuuucaaccaucguacuaucaaaaauacaucaaaguuaaaaccuuguuuuucgaacuuugaugauauuuuuuguacaaaaugucauguacgacuguugaaaaagccauuugcucaaaaaaauaauguaugacuu	250	(((((.....))))).........(((((((.(((..((((((..............))))))..))).).............(((((((......)))))))..(((((.((.((((((((((..(((((((((.((((((((((((((((((((((...)))))...)))))))))).))))))).)))...........))))))..)))))))))).)).)))))...............))))))	29.2	-52.9
ghy-miRn64	aggguugguuugauauaaaauguc	24	cccuuuauauuagaccaaccaucg	c30739.graph_c0	+	53	302	uuuugguauuuuuccaagaacgaggguugguuugauauaaaaugucaaguauaaugguucaaaaaguaauucacuuuguuuaguuucuuccauuuuugugugauuuccgguccuuaauugagcaaaugacauuucgaacaauuauacuuaacccuuuauauuagaccaaccaucgcaguugguaaaaucccaaauuaacuugcgauuugccaaaaguugucaaacuaacccucuacuuauaaaaaagugc	250	.(((((.(((((.((((...(((.(((((((((((((((((..((.(((((((((.((((...((((...(((.(((((((((((....((.................)).....)))))))))))))).)))).)))).))))))))).))..))))))))))))))))).)))...)))).))))).))))).......(((((((.....))))))).............(((((......))))).	32.4	-66.2
ghy-miRn65	aaaaguuuagaucaugcuggcagc	24	ugccauaugaucuaaucuuuucu	c33809.graph_c0	+	376	625	acuuauuauugcaccggagauggaucccaacacccucgaagacuucauuguuacacgugaucgaaguucaagaaagaaaacucaacgguuuuaacaauugaagaaagcgaaagauaagaacucguaaaaguuucugaauucgugaaauacaccaacaggugaagaugccauaugaucuaaucuuuucuuacuguauagcuucuaaaaaguuuagaucaugcuggcagcuucaucugcugucguuucacgc	250	.((((((.((((...(((......)))...............(((((((((((..(((........(((......)))......)))....)))))).)))))...))))..))))))((((......))))........(((((((((((....(((((((((.(((((((((((((((.(((((......((...)).....))))).)))))))))).))))).))))))))).))).)))))))).	38.4	-63.2
ghy-miRn66	aaggcggguugggagggg	18	caccccgcacccgcaaaga	c17901.graph_c0	+	316	565	gguuuuuuagcgagccgggucuaaggcggguugggagggggccugcacccaccccgcacccgcaaagaaauugacgggucggucacaggc	90	.((((...(.(((.(((..(((...((((((((((..(((.......)))..)))).))))))..)))......))).))).)...))))	64.44	-36
ghy-miRn67	uuuggggucggcuacaugaauucu	24	gauucuccuuagucccaaaua	c30918.graph_c0	-	0	232	acaaaguaucaaaucuuucuuuucuucaauccuccuccucuuccaccuuucucauuauaaugagcaauuuaauaggaauaucaaaaaagaaauuuggugaaagaaucgcccaaaaggaaaauccucggagcaucuaaauaccauuagauguaauuuaaucaacaauaguuaggauuuacauggauucuccuuagucccaaauacaauuuggggucggcuacaugaauucucc	232	..((((........)))).........((((((.((((............(((((....)))))...........((((.((......)).))))(((((.....)))))....((((...)))).))))(((((((......)))))))....................)))))).....((((((....(((((((((((...)))))))....))))...))))))...	34.05	-38.9
ghy-miRn68	aaaagucuguuaguuaucugaaac	24	aucaguucuaaaauugucuuuuua	c51024.graph_c0	+	203	452	uuucaguuaucugaaaaacauucuauuaugcucaguugccgcuaucaccuccaugaauuacaauaacagagacgaccaugauuguguaugugucauggcauggcgggcuuguggugguguguaucaguucuaaaauugucuuuuuaauuaaaaggacagugucaaugguagggcaaccucaacucuuuggcauuuauuuuaguaaaaagucuguuaguuaucugaaacgcauucuaucaugcucuuuaua	250	((((((....))))))..(((......)))........(((((((.....((((((..((((...(((.((.(......).)).))).)))))))))).)))))))((..((((((((((((.((((..((((....(.(((((((.((((((....((((((((.((((((....)))..)))..))))))))..))))))))))))).)..))))....)))).)))))..)))))))))........	36.8	-60.8
ghy-miRn69	aguuacgaccguuugaaguuuugc	24	auugauucaaucugacgucugagu	c50495.graph_c1	-	41	290	aaauuuggccuaacaauuuucccaaaaaaugccuauuucaucaagaauuaaaacauuuuacauaaaaaauacacauuuucuugaugaaauaggcuuuuuuuugggaaaauuguugggccaaauugccuuuggcguuugccagggcuagaucuugaaacaauacaccuuuaaaaaaaaauugauucaaucugacgucugagucaaaaguuacgaccguuugaaguuuugcauguaaguuguacauuuucaa	250	.((((((((((((((((((((((((((((.(((((((((((((((((.......(((((......))))).......)))))))))))))))))..))))))))))))))))))))))))))))(((((.(((....))))))))......((((((...((((.(((......(((((...((((....(((((((((........))).)).)))))))))))))......))).))))...))))))	31.6	-90.3
ghy-miRn70	uuguucguggaagauaugauuc	22	aacaaucuuuuucugaacauaguaac	c8966.graph_c0	+	104	353	aacacucuugcuuaaguuggugcauauauauuuaucauguccaacuuguugcauauacucuauuugagaaccuccaagggguuuagucaaaauaucaacuacuugaauugcacacuugacccaaacaaguucaauagauaggggcucacucgaugucccaacaaucuuuuucugaacauaguaacaauugaccucuaugugcuuuguuuguucguggaagauaugauucu	230	........(((.((((((((.(((((((....))).))))))))))))..))).....((((((...((((.......(((((.(((...(((.((((....)))))))....))).)))))......))))))))))..(((((((....)).)))))..(((((((((..((((((....(((((...((......))...))))))))))).))))))).)).....	36.52	-50.8
ghy-miRn71	auuuucgggucugauguucguaac	24	uacgaagauaggaccugaaaauga	c47105.graph_c0	-	47	296	ugcuuagaagccuuuucaaaucauuuucgggucugauguucguaaccuucguguuacgaagauaggaccugaaaaugaaaagauuauaugaauugauuguuauagauuugcuuggacaaaaaagaaaaaagaacacauauuuauacauuauuugcacauuuuauacacauugagugaugauuggauuguagaauggaagacuuuguauucuuuucaccaugaauguuggguaauggaauauaugaaaagg	250	..........((((((((..((((((((((((((.((.((((((((......)))))))).)).))))))))))))))........(((((((....((((.....(((.(((........))))))....))))...)))))))...........(((((((((...(((.(((....))).))))))))))))........((((((((.((..(((.......)))..)).))))))))))))))))	31.2	-62.7
ghy-miRn72	aucuuccgugccgucugcugcacc	24	uguuguugacagcacgga	c49230.graph_c0	-	718	967	acacauuauauuauauggggauaucuuccgugccgucugcugcaccaacauuagaugcagcagcgcauuaaaaauuguacauuuuaaagggugauaaauuuuuuuuuaaauuuauuaaaaauguacaacuuuuaauguguuacuacaccuaauuuuuguguuguugacagcacggaaaauaucucauuuauauaaauaaaccaacauauuaaagaaauaaaaacaaguccacaugacaaauucccuuguc	250	.....((((.((((((((((((((.((((((((.(((.((.((((.((.(((((.((.((.((((((((((((.(((((((((((......((((((((((......))))))))))))))))))))).)))))))))))).)).)).))))).)).)))).)).))).)))))))).)))))))...)))))))))))...................................(((((......)))))	29.6	-73.3
ghy-miRn73	aaaagugauuaucugcguuuuggg	24	aaaacgcaaauaaucagauuagug	c49003.graph_c3	-	126	375	auuccauccaguuucaccaagguuuaauguguuuuucaauuucaucucuugugcaaccuucguguuaggguuuucauuuguuuaaguggcguuuuguuguuugacuuaggggguguuuggguuugauuauuagaggugauuauccgauuauugcauuugcaaaacgcaaauaaucagauuaguguguuugacaaucucauuaucaaaagugauuaucugcguuuuggggucaaaacgugauuuccauaau	250	.....((((.....(((.((((((..(((....................)))..)))))).)))...))))......((((..((((.((((((((.............(.((((.((((((..(((((((...))))))))))))).)))).)..((.(((((((((.(((((((...(((((.(.........).))))).......))))))).))))))))).)).)))))))).))))..)))).	35.2	-49.8
ghy-miRn74	auuuuugauacacuuuugccaagu	24	uuggcaaagguguaucgaaaauac	c48550.graph_c1	+	770	1019	uugacauuuuguauuaaaaaaaaucaaaguuggaaaauuucauuggcaaagguguaucgaaaauaccaaaaugaugucguuuugauuguauuuuugauacccuuuuuccaaguacaguguuuaaaacugauuuuuuuuuucuguuuuuaacauugugcuuggcgaaagugugucaaaauuccaaaaugacgucguuuuaaugacauuuuugauacacuuuugccaaguaugaaauaguaaaauuugguau	250	......................((((((........((((((((((((((((((((((((((((..((((((((((((((((((.......(((((((((.(((((.((((((((((((((.(((((.((.........)).))))).)))))))))))))).))))).)))))))))...))))))))))))))))...))..)))))))))))))))))))))...))))))).......))))))..	28	-92.4
ghy-miRn75	uuuuuugugaucuuggcgaccu	22	gucauugagauaacgagaaaga	c47642.graph_c2	+	1133	1382	gacccuuaaauauuacgugauuacaagaacaaggaaaccuaagaaaaagggcuugaagaacaucgagacaagggcuuggugaauucaagaacgaauuaauacugauagccgaauuccaacauacaacucuuguuuaaauuguaggucauugagauaacgagaaagaaaagauguugcauucaaaaacgaauugauaacaucuuuucuuuuuugugaucuuggcgaccuagaauccgaaaaagauuuguau	250	..(((((.....(((.((..................)).)))....)))))(((((......))))).....((((.(((((((((......)))))..))))...))))..........((((((.((((.(((..(((.((((((.(((((((.(((((((((((((((((((((((((......))).)).)))))))))))))))))))).))))))).)))))).)))..))).)))).))))))	34.4	-70.7
ghy-miRn76	agaaacguuccggcugacccuagc	24	augggucagugucaggaacguuucacu	c57140.graph_c0	-	214	463	aaccgaaaacccugcaaacaaaagaaacguuccggcugacccuagcgcaugggucagugucaggaacguuucacugacaacuaaauuggaacaccaguuugaaacugccgcaaugccgccaccgaggccgcgguaucuuaauggguauauuucggaguuuacgauccacggugccguccccaucccuggggaguaggauaugauguauaaugcuaggauuacaacugcuaaaaauccguacuugcuuggg	250	.........(((.((((......((((((((((.((((((((........))))))))....)))))))))).........((((((((....))))))))....((((((...(((........))).))))))........(((((.....(((........)))...))))).((((((....))))))(((..((((...))))..)))..(((((............)))))....))))..)))	49.2	-80.7
ghy-miRn77	aaggcucauguugacugcuuuggc	24	uucagcggcaauuugagcucuaua	c60751.graph_c0	-	509	758	cuugucuuuguauuuucuuuucagcggcaauuugagcucuauauucuucaaggcucauguugacugcuuuggccaaaucuucuucuguuucuucu	95	......................(((((((((.(((((.((..........))))))).)))).)))))...........................	37.89	-17.2
ghy-miRn78	uggcaaugaugaugaacacaauc	23	uuguuuucaagcacuuuugagccac	c25361.graph_c0	-	75	324	agcugaaacagaggugaaaaaguggcaaugaugaugaacacaaucucucucauaucauuacaacuauugagggauuaccugugauuguuuucaagcacuuuugagccacuuuuucauucuuaauuuuaucuccauuuuucgccuguuugaagauuuauuccuugauuuaggucuuugauuuuuaggaauuuguuuugacgauaagacuaucauucaaauauauuauuaaauugauugcucacuaagacua	250	..........((((((((((((((((...((((.((((.(((((((((((((...............)))))))........)))))).))))..)).))....)))))))))))))......(((((((((((..((((......(((((((((((..........)))))))))))......))))..))....)).)))))))....((.((((.............)))).)))))..........	31.2	-49.2
ghy-miRn79	agaccggucaacuaucaaaauucu	24	auuuugauaguugaccggcuucuc	c19442.graph_c0	+	51	300	auguuauaauuuuucuuuaguuagaccggucaacuaucaaaauucuaauagacaacucauuuuugacaaaaaaugucauuuacgguuaaaacauaauauuauuuacuaaauuaccacaauauauuaaaauaaggguuguuuaucauuauuuugaccggaauuuacauuuuuauuuuaaccagaaauguguugucuauuauuauuuugauaguugaccggcuucucggaagaaaaaaaaauaauaccaugg	250	.((((((..(((((((((....((.((((((((((((((((((..(((((((((((.((((((((...((((((((......((((((((..(((((.........(((((.(((....(((......)))..))).)))))..)))))))))))))......))))))))........)))))))).)))))))))))..)))))))))))))))))))).....)))))))))...))))))......	25.2	-74.9
ghy-miRn80	ucugaagcuuaaaaaaacgucg	22	acguuuucuuaagcuucgagg	c12479.graph_c0	+	267	516	aaucuaacgcaaugucgucgccucugaagcuuaaaaaaacgucgcccggcgaaucgauucuguauuuguuucguauucgacguuuucuuaagcuucgaggcuauggcguucguuaucaaucaucguuucccgauaucucucuguuuucggauuaucgacaacgguaaauugaucaaauugauuaauuugaaugaacuuguucauguguuuguuuguugguagaucuguagauauaagagcguuuuaguua	250	....(((((.((((((((.(((((.(((((((((.(((((((((....(((((.(((........))).)))))...))))))))).)))))))))))))).)))))))))))))......((((.....))))..((((.(((((.(((((((((((((....(((((((((((...)))))))))))(((((((..........)))))))))))))).)))))).)))))..))))...........	38	-81.1
ghy-miRn81	auaucuuccgugcuguuaacagca	24	uaacagcacggaagauauccc	c47733.graph_c0	-	42	291	uuaaaccauuauuuaaggggauaucuuccgugcuguuaacagcacgaaaguuaugugcuguuacgcauuaaaacuuauacauuuuuaauagcagugcauuaaaaaauaaaacuuauuaaaaauguacaagucuuaaugcacaacagcacauaacuuucguguuaauaacagcacggaagauauccccuaauauguuuguuagguaguuuaaguuauuuauauuagaagcuucauauuuuugagguuaggg	250	.(((((...((((..(((((((((((((((((((((((..((((((((((((((((((((((..(((((((.((((.(((((((((((((..(((...............)))))))))))))))).)))).)))))))..))))))))))))))))))))))..))))))))))))))))))))))))))).))))).(((((((......))))))).......(((((((......)))))))....	30.4	-110.6
ghy-miRn82	aucaaacacuugcaccucuguaug	24	uacagaggauuaagaguuuacuca	c47139.graph_c0	+	0	152	gaaaggguaauuuuguccuucuccaucgcugcgugcuacgcugugugauaaagcgacggggcugccucuguauccauacagaggauuaagaguuuacucauuuuuuaucaaacacuugcaccucuguaugauacagacguguuugccauaca	152	.....((((.((((((((((...((.(((.((((...)))).)))))...))).))))))).))))((((((((.(((((((((..((((.((((..............)))).))))..))))))))))))))))).((((.....)))).	44.08	-46.6
ghy-miRn83	agcaccgagugggcuggacgaugg	24	gugguuggauugauugaaugguggauu	c46429.graph_c2	+	605	854	guagcccgagcuggguuacgagagcaccgagugggcuggacgaugggaguagggcugguuugacugcgguuugaaggcccaacugacgggcuugggugugagacggcuggaggagaggaagguugggcuagagguugcugauccguagucgagccagcagguugcugggccggugguuggauugauugaaugguggauucgucggguuuggcaguggaggaucgggaguuaugcaagaaauauggaugua	250	(((((((.....)))))))(((..((((((((.((.(.(((.((.(((((((.((((((((((((((((......(((((((((..(...(((.(((........))).)))....)...))))))))).............))))))))))))))))...)))))...)).)).))).).)).)))...)))))..))).((..((.((((..(.((...)).)..)))).))..))............	57.2	-84.4
ghy-miRn84	uuucugguguaguagguguacu	22	uuacugucaccaggagauucgag	c29469.graph_c0	+	0	168	cgccaguaauuccucuucgagcauaguccauuuugaggauuuuuuuauuucuacuuuacugucaccaggagauucgagaucaaauuuuucaacccaucuugggugaaaaaaggagagguggguguuucugguguaguagguguacuagcuuguuggucguauucaguu	168	((((((...........(((((.((((((.......)))............((((((((((.((((((((((((((...((...(((((((.((((...)))))))))))..))....))))).)))))))))))))))).))))))))))))))).)).........	40.48	-42.4
ghy-miRn85	auucauuuuccucaggaacucacu	24	uggcuuccaggaaaacacuuucc	c48204.graph_c0	+	0	203	ugccuauuggugaucauagcaugauauccauaacuuucauuuugguccaaacguuuucuuccuuuugucuauauuaagggugugcuuguuucagggaaaauggcuuccaggaaaacacuuuccaguguuugguaaccaagaaaacuuggucaacaggauucauuuuccucaggaacucacuuucccuuaaacaaacacagaag	203	.(((....)))(((((....((((............))))..))))).............(((((..........)))))((((.((((((.(((((((.(((.(((((((((((.....(((..((((.(...((((((....))))))))))))))....)))))))..)))).))).))))))).)))))).))))....	38.42	-51.4
ghy-miRn86	uuuagguguugcaucaaugug	21	cguggauccaacguuugaaga	c47836.graph_c0	+	1503	1752	augugcagccccuaugcauaucuuuagguguugcaucaaugugagacaugugcaugcaaaaacaugugaugcauuuguuucacguggauccaacguuugaagauaugcauugaggcuacuuauggaugaaguuaucgcaaaaauccuaugaggguguucuggucuaugagcgcuccuuuuugcauauaccauagguguugcgucaaugugaaacgugugcaugcaaauaauuguuuugcacauguuucau	250	.(((((((((.(.((((((((((((((((((((.(((.((((((((((.(((((((((......))).)))))).)))))))))).))).)))))))))))))))))))).).)))(((((((((.((....(((.(((((........((((((((((........)))))).))))))))))))))))))))))).)))).))..((((((((((((((.((((....))))..))))))))))))))	40.4	-101.3
ghy-miRn87	accgguugucuagagauuaaaaca	24	uguuuuggucucuagaaaacc	c49138.graph_c2	-	1940	2189	gaaaauguccagaacuguguucugaacauuuucuuuacuagacauuuucucaaggauaacucagggugggguugguggcauuaaaacccuuuguacuauuaguuaauuucuaauuuggucccuauaucacacaaaccaacauaaaaaccauaguguuuucuaaacguuauguuuuggucucuagaaaaccggaacuucaacuuuaccgguugucuagagauuaaaacagaaccuuuaaaaaauacaauca	250	((((((((.((((((...)))))).)))))))).....((((.(((..((...((...((..(((((.....((....)).....)))))..)).))...))..))).))))..(((((...............))))).............(((((((.((((.(((.((((((((((((((((.((((((.............)))))).)))))))))))))))).))).)))).))))))).....	34	-66.8
ghy-miRn88	aauaguccgaauguuugucaaugu	24	uuuggccaacuuucggucugu	c43026.graph_c0	-	2435	2684	cccuucuugggaaaaauccuaaaauaguccgaauguuugucaaugugcaucaaaaugcccuucucuugccaacuaugauggcugguuugcacuuugacaaguacaggguucauuuauacacuuuggccaacuuucggucuguuuucggauuuugucaaggaggguucguuugauacuguugauaauacgaaccagagaaaauauaauuguguuuuauuacaaaggagaaucaccuauuuauaaguugcau	250	((((((((((..(((((((.(((((((.(((((.(((.(((((.(((.........(((((...((((.(((........((......))...))).))))...))))).........))).))))).))).))))).))))))).))))))).))))))))))......((((.((.((..(((((.(((((((...........))).)))))))))...)).)).))))..................	37.2	-67.7
ghy-miRn89	aaacgacuacuuuagacuacaagu	24	ucguaguccaaaauauucacuuuu	c50245.graph_c3	-	219	468	uuaugcucaaccugcagguuuuagucuauuggccuuuuuuuauacucguaguccaaaauauucacuuuuugcacucauaguccaaaaccuuagcaaaaaaagacauuuuugguuccucuacuauuguucaaucugcaaguuuuggaccaugaauacaacaaacgacuacuuuagacuacaagugcaacaaaaaagacucauggaaua	207	...(((.......)))........(((((.((.(((((((..((((.((((((.(((.((.((..((.(((...((((.(((((((((.((.(((......((((.(..(((.....)))..).)))).....)))))))))))))).))))...))).))..)).)).))).)))))).))))....))))))).)).)))))...	34.3	-42.4
ghy-miRn90	aagugucaugaucuaauaguuaga	24	aacuaucagaucauaacacuugua	c52727.graph_c0	-	150	399	auauauuaccacuuuuugcuguuuuaaaaacuaaaaguuguaauaaaaaauauuaacaaaauguaaaaagaaucgauguuaacaguaaaaaaaauaagcauuugggaaagagaaaugauacauauagauauaauuuguaugcuuaacuaucagaucauaacacuuguaaaaagagacaaaagaaaaaaugaaacucauaacgccaagugucaugaucuaauaguuagacauacaaauuaagucuuuguuu	250	............(((((((((((.............((((.........(((((.....))))).........))))...))))))))))).......(((((.........)))))....(((.((((.(((((((((((.((((((((.(((((((.(((((((......(((..................))).......))))))).))))))).)))))))).))))))))))).)))).)))..	24	-51.8
ghy-miRn91	aaagugaguuccugaggaaaauga	24	guuuuccuggaagccauuuucc	c48204.graph_c0	-	0	205	cccuucuguguuuguuuaagggaaagugaguuccugaggaaaaugaauccuguugaccaaguuuucuugguuaccaaacacuggaaaguguuuuccuggaagccauuuucccugaaacaagcacacccuuaauauagacaaaaggaagaaaacguuuggaccaaaaugaaaguuauggauaucaugcuaugaucaccaauaggca	205	.(((..(((((((((((.((((((((((..((((..((((((((...((((((((((((((....))))))))....)))..)))....))))))))))))..)))))))))).))))))))))).((((...........)))).......(((((......))))).......(((..(((((...)))))..)))..)))..	39.02	-64
ghy-miRn92	aggggccgguugguucaaaguggg	24	cauaccaagcacccccuaa	c50071.graph_c0	+	2197	2446	gaucuaucuuaaaaauaaguuuaggggccgguugguucaaaguggggaaaggaaaagacaaagggaaagggaaugugggggaaugggaauggguauucucauagcauaaaaaccaaaccccccaauuuaguggguaaugguucauuacccacuuuuggauaaugccuugcauacccuucaaccaagcaccuuuaaucauuucuuuaccaauuucucacccucuaaacccccauaccaagcacccccuaaa	250	.......((((....))))((((((((..(.(((((.....((((((..(((...(((.....((.(((((((((((((((..((((((.((((((...((..((((.....(((((...........(((((((((((...))))))))))))))))...))))..)).)))))))))..)))....))))))..))))))))).))....)))...)))......))))))))))).)..))))))))	42.4	-76.2
ghy-miRn93	aggauuuuaccaacuaugacggug	24	cccucuguggaaaaucccaa	c42551.graph_c0	+	37	286	uuuggcaaaaugagugaauuacucaacccuuuuauuugacauuuugucucaagcaacccucuguggaaaaucccaaaauagacugaagguuuaccaaagugaaucaaaaugccuucuuuuugccaacuaugaucuuugguuugaugcacuucugacaaguaggggaucauuuugauacauuuuugacagguacaggguucauuuaggauuuuaccaacuaugacggugauuugauacaaaguguugguac	250	..........((((((...))))))(((.........((((((((((.(((((..(((.((..((((((((((..((((.((((....((..(((((((((.(((((((((.(((((.((((.((....(((((........))).))....)).)))).)))))..))))))))).)))))).....)))))..)))).)))).))))))).))).....)).)))..))))).)))))))))))))..	36.4	-59.4
ghy-miRn94	auugaugaugugauguguuaguuc	24	acuaacaaaccauaucaucaaugu	c57642.graph_c0	+	47	296	ucguaguaacacaccaugagacauugaugaugugauguguuaguucacacagauuaugccacguaugaaagagaaaauaacaguuucccuucucucucuuagugucuuauuugaaaaauaguuuuaaaacauggauauaauuaauuacuaaucuaaguuugaaccguauaugguuauuuucucuuucauaagugacacaauguguggacuaacaaaccauaucaucaaugucacaugguguguuaguauc	250	..(((.((((((((((((.(((((((((((((((...((((((((((((((.....((.(((.((((((((((((((((((...........((...((((((((((..(((((((.....)))))))....)))))...............)))))...))..........)))))))))))))))))).))).))...))))))))))))))...))))))))))))))).)))))))))))).))).	32.4	-99.5
ghy-miRn95	acuuuuggucugugugguuucacg	24	uuauuacccacaggccacaaggga	c45779.graph_c0	-	11	260	ggauuggagaaccauuggcauggaugucaauuuguguacuucauagaucagcaauacauuuaguugcccgguuaguucuucugaaauaagcuagcauuggaccuguuuuaccaucuuuucaagaaaaaccuuugugccuuauuuuacuauccuccuaaugccuaccaugaacguuauuacccacaggccacaagggaaaacccuacuuuuggucugugugguuucacgauuuuaucacaauuaggucaac	250	((((.(((((((...(((((....)))))(((((((.....)))))))..(((((.......))))).......)))))))(((((((((...(((..((.....((((...........))))....))..)))..)))))))))..)))).((((((.........((((((....((((((((((((..((((....)))).....))))))))).)))...))).))).......)))))).....	39.6	-56.8
ghy-miRn96	agaauuugacgcgucuggauaucc	24	auugucagugcugucacaucguag	c45260.graph_c0	+	254	503	uuuuccuaacuaacaugcaugacauaacuugugaguuuugucuuuauuacauaaaauaaaaccaucacuaaggacugaagcaauguaucaccuagaugacccauauguuggugcuaaguggauugacuugaaaaaagaaaagcaauuagugaggcaggagagggcguggcgggauagggauugucagugcugucacaucguagaagaauuugacgcgucuggauauccuucauagaaaaaccaugagcgu	250	(((((((..((.((......((((.((((....)))).))))((((((......))))))....(((((.((.(((..(((((((..(((......)))..))).))))))).)).)))))((((.(((..........)))))))..)).))..)))))))..(((((....((((((((..(((((((.((((..((......))...))))))).))))..)))))).)).......))))).....	40	-52.4
ghy-miRn97	aaggauacucgcguaaauggacgg	24	gugaguuaagcgaguauaccugugg	c46647.graph_c0	+	498	747	augauaaaaauaccagguacccaaggauacucgcguaaauggacggguacuggguauauuuuuugaguacccaaaaacucgcgaguauuuuuuaccccuuaucugugaguuaagcgaguauaccuguggguguuuuaauuauuuuuuuaacauauauguuauauguguaauuuuauuuguuuuucacuuuuuuugucacacuuuuauauaauuauuuuugaccugguacacgugugugauacauuuccau	250	..........((((((((((((((((((((((((...(((..(((((((..((((((((((..(((((........))))).))))).....)))))..)))))))..)))..)))))))).))).)))))).................(((((((...)))))))((((((.(((.........((.......)).........))).))))))......)))))))(((....)))............	32	-60.8
ghy-miRn98	ucguguguggauaccgguagag	22	aguaccuaacauccauugcaaacg	c31649.graph_c0	-	254	503	uucguguguggauaccgguagaggguacaacuuaguaccuaacauccauugcaaacggcaaucacuaucagagaacagaggcuccuaaugaagaauuugacgaacaucuuaggcaccuauacggugaaaagugcaccggggaccccaaugagcuggcgcaguugcccgaaggcauuacagaauugcugcaacaugaaaagcuuccuguuccauugauuaagugucauaa	229	.((((..((((((...((((..((((...))))..))))....)))))).....))))....(((((((((.((((((((((((((((.((...............)))))))((((.....)))).....(((.((((.............)))).)))(((((.....((((.........)))))))))......))))).))))))..)))))..))))......	45.85	-57.8
ghy-miRn99	aggcuaugacucuggcaggucu	22	aagaagauggagguagcugggagg	c17360.graph_c0	+	15	264	ccauucgccaagccagaaacuuacaggcuaugacucuggcaggucucuaugggaaucuucuuacccacgaucuagagcucuaacaaauaagaaaccaguugaaggaagucaagaacaaaucuauggccuuggucucuuccgaagcuguaaagccaguuguucaaaaaucuacuuagaaagaagaagaugacguagaagaagaagauggagguagcugggaggaauucuaggaggaggucaaugaaucuau	250	.((((.(((...((((((.(((...((((((..(((((.....((((((((...((((((((..........((((.....(((((.........(((((...((((((((((..((......))..)))))...)))))..))))).........)))))......)))).........))))))))..))))).)))......)))))))))))...)))..)))).))....))).)))).......	42.8	-59.4
ghy-miRn100	aacugccggcuguauuauaaagcg	24	cuguauuaugaagcggcagauga	c81841.graph_c0	-	0	191	caaagaaacaaaugccgaagacaacugccggcuguauuauaaagcgacagaugagaacugccgguuguauuauaaagcggcagaugagaacugcuggcuguauuaugaagcggcagaugagaauugccgguuguauuaugaagcggcagaugaacugccggcuauagcaugaagcggcagaugaagugccg	191	.......(((...((((..((((.((((((.((.(((.(((.(((.((((.......((((((.((........)).)))))).......))).).))).))).))).)))))))).))....))..))))))).........(((((..(.(.((((((.((.........)))))))).).)..)))))	47.64	-57.2
ghy-miRn101	auucgguucgguucgguuaaaacu	24	aucaaacugaauuaaccaaauaac	c17213.graph_c0	-	18	267	cuguuuuuucauaaaacaaaggcgacuuuuugaacaaaggcagugauagcuuguuugguuacacuugcaaauuuugcucucuuuuuaaagaaauauuuaauuuaaaaauaccggaaagaaagagaaaaaaggaaaggugggaugcaagaaucgaaccaacauguauauuaaucaaacugaauuaaccaaauaacaauucguguuauucgguucgguucgguuaaaacugaauaaaccaaauaguguauca	250	((((((((...(((((...((....)))))))...))))))))(((((..((((((((((......((((...))))(((((((((.......(((((.......)))))......)))))))))..........(((..(((......)))..))).................(((((((((((((.(((((((.....))))))).)))).)))))))))...........))))))))))..)))))	31.2	-51.3
ghy-miRn102	auaauuuccgugcuguuaacaaca	24	uuguuaaugucacgaaaguuaggu	c38306.graph_c0	-	66	315	aagaguaaacuacguuuuuagugcuguauuauuguucaauuuacaguuuuauuucacuugacuucuuuuauugggauaacuuucauguuguuaaugucacgaaaguuaggugcuguugcgcauuaaaauuuguacaucuuuaauaacaacguauuaaaaaacaaaauuuauuaaaaauguacaaguuuuaauacguaacaacgcauaauuuccgugcuguuaacaacacggaaguuauucccauauauua	250	...((((((....(((...((((..(((..(((((.......)))))..)))..)))).)))....))))))((((((((((((.(((((((((((.((((.((((((.(((.(((((((.((((((((((((((((.((((((((....((........)).....)))))))).)))))))))))))))).))))))).))).)))))).)))).))))))))))).)))))))))))).........	28	-80.3
ghy-miRn103	augagguggcaugaugugguuaag	24	uaaccaaguaaugccaccucguga	c32177.graph_c0	-	0	178	auaccaccaacuugacugcuucaugagguggcaugaugugguuaagaaagagaauucaaaagugguggaccccacuuaaccaaguaaugccaccucgugaguugguaaguuuagugguaucuuugagugguuuuauaggauuacuccgcuaacacaccuacuuuuucuucccacuuuu	178	(((((((.((((((.(((.(((((((((((((((....((((((................(((((......)))))))))))....))))))))))))))).)))))))))..)))))))....(((((((((....)))))))))................................	41.57	-58.6
ghy-miRn104	aaguuagguggucuuuauaggauu	24	accaccuaacuuaucacuu	c49221.graph_c0	+	738	987	uuagguaauuugacauacaacaaugcuagcuaagccaauuuuuuuuuuaacuaaauacaaauuguuuaauugaauauuucaaagaguaauccuacaggaccaccuaacuuaucacuucauguugugguuaagugggcccaucacuuuuugauuuaucuuucuuaaccacuuaaugacaccuaaugaaguguuaaguuugauuauaaguuagguggucuuuauaggauuacuuuauuucaaaauagauaua	250	........(((((.(((.......(((.....)))((((((...(((.....)))...)))))).....(((((...))))).(((((((((((.(((((((((((((((((((((((((..(((.(((((((((..............................))))))))).)))....))))))))............)))))))))))))))))..)))))))))))))).))))).........	28.8	-68.3
ghy-miRn105	acgcccuuugugaguguaggcaca	24	ugucuacauucacacagggugugg	c59888.graph_c0	-	481	730	auagaaaugacauacauguuuaacuauacucgcuuaauugugugucuacauucacacagggugugggcccuaccucauuuaaugguguggguccuacgcccuuugugaguguaggcacauauucggacauguauuucauuucu	143	..((((((((.((((((((((.................((((((((((((((((((.(((((((((((((((((.........)))).))).)))))))))).))))))))))))))))))...)))))))))).))))))))	41.26	-73.8
ghy-miRn106	cacgagugguuuugugaacag	21	guucacaaaacgaaguuguuaauggc	c19717.graph_c0	-	135	384	uuagaccuguuagaacuacaucuacgggguucuugagaagacggaucaacaacaauuuuucuaaaaaccuuaucuuucaaggagggacacccacgagugguuuugugaacagcagguucacaaaacgaaguuguuaauggcgugauuauauccuuuaacuuccuuaguaaacuaaauuuaccagauuuugacugguuguucaaaguuguaauaaaccuuuggauuucgucuucacacccaagaucaucau	250	.....(((((.(((......))))))))(.(((((.(((((((((......................((((.......))))((((((((((((((.(.(((((((((((.....)))))))))))..).))))....)).)))......)))))........((((....))))....(((((.......))))).((((((((((......)).))))))))))))))))).....))))).).....	37.2	-58.6
ghy-miRn107	aaaauaccguuuggcuagaacuug	24	auuuuagacaaacgguauaaagcc	c35099.graph_c0	-	8	257	guccacaauuuaguuguuuguuugcuuaagcuuccugcuuuggguaauugauaugaaaccgaaagagggauaucauuuauccuuagccgagauuuuagacaaacgguauaaagccaaaaggaaaauaccguuuggcuagaacuuggaaaaucgauaugaaaccgagaggaggauauugauuuaucggaacucuugcaacuaaauaagacgaccuuuuaugaaaccgaaagggagauuuuggguuguuuug	250	.......((((((((((..((((....((((.....)))).((((((.((((((....((......)).)))))).))))))....(((((.((((((.((((((((((....((....))...)))))))))).))))))))))).((((((((((....((....))...))))))))))....))))....))))))))))((((((((((...((....((....))...))...)))))))))).	37.2	-75.1
ghy-miRn108	acggucucaaggauuuuugcccaa	24	ggacagaaauacuucugacguac	c56261.graph_c0	+	129	378	agaucaaaacaaauaugaucgcucaauucauaugaacacaaaccauacugggccaucauuuugggccaaccgugcguacaaaaagucaggccuaaguccaacaagaacaggacagagagagaagaaggaacuggacagaaauacuucugacguacuaauacggaccucagggucguaucgguacgcccuucaggccguacaaguacggucucaaggauuuuugcccaaaaacauuuuccaacuuuucauu	250	..............(((((.(((((.....((((.........)))).))))).))))).(((((((.....................)))))))((((..........)))).....((((((..((((.(((.((((((..(((..((((((((..(((((.(((.((((.((((....))))))))..))))))))..))))).)))..)))..)))))).)))........))))..))))))...	43.6	-68.3
ghy-miRn109	aaaugcgacugagaacgaugaagc	24	agagucggccaucaggaac	c33313.graph_c0	+	404	653	acguugggagaaacuauuuggugacaagcgcgaccaaaaacaaggaaacgagauggcguuggaacaaaggucgugagggaugaucgacucaaagagugcaaccaaaacccagugagacgcaagagucggccaucaggaacacaugacaagguggauuuguuuggcgaggucuuagcggugaucugagagaacagguuggaugggaaaugcgacugagaacgaugaagcaacuuacaagaaguacaaaaga	250	...((((..(..(((.((((((((((..(((((((...........((((......))))........))))))).....)).)).)).)))).))).)..))))......(((((..((....((((..(.((((...(.(((..(....(.(((((((((....(((((........)))))....))))))))).)....)..))).).)))))..))))...))..)))))...............	47.6	-53.7
ghy-miRn110	aggauugacagaguuuuucucauc	24	uagagucaaaucaacauccuca	c30276.graph_c0	-	513	762	gcagauauacucuaucaucgugaggauugacagaguuuuucucaucagcgaaaugaggcucacuaaaggugguuucuuccucugaaauuagaaaaucagucuuugaggagggacuccaaguagggugauaccucagacacugauagagucaaaucaacauccucauuggcacuuucagguugugguaucucuuccucaguaugguguuacacugaggagucauagagaacaaaaguuaagacuucuagau	250	.........((((((....(((((((((((.....(((..((((((((.(...(((((.(((((.....(((.(((((((((.((.(((........))).)).)))))))))..))).....)))))..)))))..).))))).)))..))))))..))))))))((.(((.........))).))....(((((((((.((....)).)))))))))..)))))).....((((....))))......	41.2	-66.4
ghy-miRn111	uuuaaaucauuguacugcgug	21	cauaguacaaugauuuaaagc	c13095.graph_c0	-	0	153	uacaagcuuauauguuuccuacuuuaaaucauuguacugcguguauuaaaaguuguaccuuuaaaucacucacuacauuccaaaucuugauacaacuuucaacgcacauaguacaaugauuuaaagcgauaaacauaaaugcuugguuguuuc	153	..(((((...(((((((....((((((((((((((((((.((((.((.(((((((((.(.............................).))))))))).)).)))).))))))))))))))))))....)))))))...)))))........	30.72	-48.1
ghy-miRn112	aucgaugaugacuuugacauguua	24	acauguagcauuuaacuagauac	c5416.graph_c0	+	0	166	ggaagagcuaccgaugguucaagauaacuaucgaagaucuaaucaagauaguuaccgaagcauugaagacaguaguuaccgauggaaugaagccgacauguagcauuuaacuagauacauaucgaugaugacuuugacauguuauaagucaucgguaucuaccaga	166	...........(((((.(((..(.((((((((...(((...)))..))))))))).))).)))))......((((.(((((((((.........(((((((((((((......(((....)))...)))).))...))))))).....))))))))).))))....	38.55	-39.7
ghy-miRn113	aaugggccaacacgacucgagaag	24	ugucgaguauguggggcccacuuu	c35905.graph_c1	+	0	123	cgguccuagacaucauauucacucauuaguuguguuuuggugacgaaccugucgaguauguggggcccacuuuguauaaugggccaacacgacucgagaaguaacaccaaaaguaagauuucu	123	.......(((.(((.(((.(((.........)))((((((((....((.(.((((((.((((.((((((..........))))))..)))))))))).).))..))))))))))).))).)))	43.9	-35.9
ghy-miRn114	auugugcuuugaaccuauaccggu	24	cgguauacauucaaaauca	c16346.graph_c0	+	311	560	caagaaauccaauucuugugggcuuucuauaaguaauuugugauuauguccuuaauaacuagguuugauuacgaaucccacacuuguagguuugugcaugaugaagaccgcaacaaaguuuuugcccauggcuuacucgcucagacgacguuucuuguuucuuaaaaggagaaauguugguuacgugaccuuuagucaauguugauugugcuuugaaccuauaccgguaccgguauacauucaaaaucaa	250	((((((......))))))(((((..(((((((((.(((((((((((...(((........)))..))))))))))).....)))))))))(((((((............)).)))))......)))))(((((...((((.....(((((((((((.(((....))).))))))))))).....)))).....)))))...((((((.....(((((..(((((((....)))))))..)))))))))))	38	-67.1
ghy-miRn115	uaucuaugagugugugaauugu	22	aguucucacgccauagguauu	c43604.graph_c0	-	834	1083	uuaaaagauccauuugucuguucuuucuuugaagcucauuacagcaaaaagagggggagaaaggagacaguucucacgccauagguauuaaauucuucuuggagaauaacaauuuuccauuaaaaauucuauaucuaugagugugugaauuguucgauuuaauucaaaaaucaua	175	........(((.(((.(((...((((((((...(((......)))..))))))))))).))))))((((((((.((((((((((((((..((((.((..((((((((....))))))))..)).))))..))))))))).))))).)))))))).(((((.......)))))...	31.43	-53
ghy-miRn116	aaaauaaacagaaagaugacgugg	24	aauucaucuuucuauuuauuuuuu	c348.graph_c0	-	0	236	uauaagugauuaccgucgaaucaaaauaaacagaaagaugacgugguaaucgcucacacaauguuaaauuuuaacauugccaauucaucuuucuauuuauuuuuuuacauaaucauggucacucacguaauugcaaaauccaaaaaaaacucaaucacucaaaugucuauuucgacauucaagaaaugguuugagaaaauaguguguaucuuacacgucuaacgagaucaagacac	236	.....(((((((..((.(((..((((((((.((((((((((..(((............(((((((((...))))))))))))..)))))))))).))))))))))))).))))))).(((..((.(((.....................((((((((((..((((((......))))))..))...))).)))))....(((((((((...)))))).)))))).))....)))..	31.36	-48.4
ghy-miRn117	aguguuugugaguguaggagaaua	24	uucuucuacacacacaaacauugu	c52104.graph_c0	-	236	485	aucaaaaugcccuuuuuagcaagagaaaugcuaaauccucauaauuuuugugccuaauuauucuucuacacacacaaacauugugagaccuagugugggacugauaugugggcuuugcaguguuugugaguguaggagaauaauuagacacaaaaguuaagagg	164	..............(((((((.......))))))).((((.(((((((((((.((((((((((((((((((.(((((((((((((((.((((((((.......)))).)))).))))))))))))))).)))))))))))))))))).))))))))))).))))	36.59	-72.3
ghy-miRn118	aauggcuauagaucaagaaaucuu	24	auuuauugauauguauccacgguuu	c51298.graph_c0	-	227	476	augaagaaauuuuggaaacccuaaucaaaauggccacugaucaaaaaaucuugaaaacccaaugguuuugauuuggguuuucaagauuaugguuuugauucagguuuucaagauuuuucaagauuuauugauauguauccacgguuuugauucggauuuucaagccauguacauggaucaagaagucuugaaaacccaaaucaaaauggcuauagaucaagaaaucuugacagccugaauuaaaggcaug	250	.....(((((((((((((((..(((((((...((((..........((((((((((((((((..........)))))))))))))))).)))))))))))..)))))))))))))))(((((((((.(((((.((((.(((...((((((((.((.((((((((((((....))))..........)))))))).)).))))))))))).)))).))))).)))))))))..((((.......))))...	33.2	-85.5
ghy-miRn119	aagaucugguauuucacuuugacg	24	gcaaauugaacgcuagaaagaag	c57215.graph_c0	+	118	367	cuuuaaaagugauucauuaauauaaaacaaagauacaaauuaaggaaucaaaaaacaaaauaccaaaaauacgagcaaaaauaaaggaaacaaagagaguaaacuagaaaaacacaacaagaaaagaggacuaaaacuaagaagaaaagagcaaauugaacgcuagaaagaagaagaagaaagacuaagaaugcuucuuuuucgaagaucugguauuucacuuugacguucgguuuagagauacaacaca	250	(((((((..((((((.(((((.................))))).)))))).....................(((((..................................................((........)).............((((.((((.((((((..((((((((((..............)))))))))).....))))))..)))).))))..))))).)))))))..........	29.2	-31.5
ghy-miRn120	aauagacgguagucacuuaauuga	24	aacugacuaccaucuauuuucguu	c46431.graph_c0	-	1747	1996	gauuguagugauuuguucuuuuuaauuaacugacuaccaucuauuuucguuaaaaaauaaacaaaaauuugacuugaaauuaucuacaugacaaaaaauauuaauauaugauauauuaaugugacaaaaauauuaauacaugguauauuaauauuuuugucacacagauuauuuuaagucagauuuccguuuuauuuuaucaaaaauagacgguagucacuuaauugaaaaaagggaaucacgacaauca	250	((((((.(((((((.((.(((((((((((.((((((((.((((((((.(.(((((...((((..((((((((((((((((.((((...(((((((((.(((((((((((.((.(((((((((.......))))))))).)).))))))))))))))))))))...)))).))))))))))))))))..))))..))))).).)))))))).)))))))).))))))))))).)).))))))).)))))).	22.8	-96.6
ghy-miRn121	aaaguucuguuuuaaucccuagac	24	ugacuaaaacauaacuuu	c46898.graph_c1	-	0	96	auaaaaaccauuauauuuuuuaaaaguucuguuuuaaucccuagaccaccgagaaaccucaaguccccuaaugacuaaaacauaacuuuuugaaag	96	...............(((((.(((((((.(((((((.((..(((...((.(((....)))..))...)))..)).))))))).))))))).)))))	30.21	-15.5
ghy-miRn122	aaaguucuguuuuaguuccuagac	24	cuagggacuaagagagaacu	c40161.graph_c0	+	0	229	aaaaguucuguuuuaguuccuagaccaccaggaaaccuaaagacucgguuuucuagggacuaagagagaacuucuagaaaguacaauaauuuuuauauugguuuuuguaauacacagaucaaauuaaaaauuagccaaucauacaacgaguuuucacgucauuaacccuuuucuaagcuucaaacugcuccugacaaaccgucucacuuucauucguuuccgucgccuc	229	..(((((((.((((((((((((((..(((((............)).)))..)))))))))))))).)))))))...((((((....(((((((((..(((((((.(((...))).)))))))..)))))))))............(((........)))................(((........)))...(((.....)))..))))))..................	36.24	-53.4
ghy-miRn123	aagacagcucgaucaucaaga	21	agaucugguugucgcugaacauca	c28854.graph_c0	+	0	94	gacgacgauuggcaaccgcaacaaagccuuagaucugguugucgcugaacaucaaagacagcucgaucaucaagagugguugauuuauggguug	94	..((((......(((((((........(((.((((.(((((((..(((...)))..))))))).))))...))).)))))))........))))	46.81	-24.1
ghy-miRn124	agggacuuggucaacuuuaauggu	24	cauuaaauuuguaugguaauuaugguaa	c13564.graph_c0	+	0	206	gauuuuuuuaaccauuguacuuaacaauugauuaagguugcuaaaaucauaaacauacuuauacuugauaaucguguaucaaaauuauuauuguaauuugcaaaaaaguaucauuuuaaccauuaaauuuguaugguaauuaugguaaaaguauuuuuuuagggacuuggucaacuuuaaugguuaacgugauacaauuugucaau	206	((((((..((((((((((.....))))).......)))))..))))))................((((((......))))))((((((....)))))).(((((...(((((((.((((((((((((.(((...(((........((((((....))))))...)))....))).)))))))))))).)))))))..)))))....	23.79	-38.6
ghy-miRn125	auuuucgguuccgguuucagucug	24	gacugaaccgguuucaaaacccgaauggg	c87216.graph_c0	+	0	230	aagugaaauuucaaaacuuuugguaacaaguugaaaaaaauucaaauaauacucacaaaauuacuacaaaaucuucgauuuuaccaaaaccaaagaaaucugguccaugaaucgguuuaggacugaaccgguuucaaaacccgaaugggcauauaaggguugggucuugguuccaaaauuugccauuuucgguuccgguuucagucugguucaguuucagauuuugaauu	230	.................(((((((((..(((((((......................................)))))))))))))))).....(((((((((....((((((......((((((((((((......((((.(((..((((........(((((.......)))))....))))..))).)))))))).))))))))))))))...))))))))).....	34.78	-52.95
ghy-miRn126	ucugaagcuuaaaaaaacgucg	22	acguuuucuuaagcuucgagg	c12479.graph_c0	+	205	454	cauucucuaugcggauuccgauuguuuucaaacucugaucaucaauggaagauucuaguucaaaucuaacgcaaugucgucgccucugaagcuuaaaaaaacgucgcccggcgaaucgauucuguauuuguuucguauucgacguuuucuuaagcuucgaggcuauggcguucguuaucaaucaucguuucccgauaucucucuguuuucggauuaucgacaacgguaaauugaucaaauugauuaauuu	250	.......(((..(((..(.(((((......((((..((((.((....)).))))..))))......(((((.((((((((.(((((.(((((((((.(((((((((....(((((.(((........))).)))))...))))))))).)))))))))))))).))))))))))))).)))))...)..)))..))).....(((((.(((......))).))))).((((((((((...))))))))))	39.2	-77.6
ghy-miRn127	acuacuugacuauugaacuacaaa	24	uaguucaauggucaaguagug	c43580.graph_c0	-	38	287	ccgucaaacugucccauuuucacuacuugacuauugaacuacaaaaaauaauggaacaagcccuaaacuuuaauuuuguugucugcaugaccuuuuuuuguuaagcuuuuguuagugagguuaaauuugucggcauggcauguugaaguuaacccaacuaacaaaaacuuaacagaaaagggucacauagacaacaaaguuaaacuucaaggguuguuucaucuuguaguucaauggucaaguagugaaa	250	.................(((((((((((((((((((((((((((......(((((((((.((((....(((((((((((((((((..((((((((((((((((((.((((((((((..((((((.....(((((((...)))))))..))))))..)))))))))).))))))))))))))))))..))))))))))))))))).....))))))))))))).)))))))))))))))))))))))))))	34.4	-120.3
ghy-miRn128	agacacuugucgugauuuaagagu	24	ucuuagauuacgacaagugucuua	c19164.graph_c1	+	263	512	aauuuuuuuuaaauguauguguguguguauguauauauaucuuacaagggggucuagauaccaaccaaagagucuauuuucuauauacggucagugugaaaaauauuucacacaugcaacucuuagauuacgacaagugucuuaugauuuacuauaaauugaugauauccacggaacaucuuacuuauaguuauagggacuaugagacacuugucgugauuuaagaguugccuguug	237	.............((((.(((((((((....)))))))))..)))).((.(((......)))..))..((((......))))....((((...((((((((....))))))))..(((((((((((((((((((((((((((((((.((((((((((...((((...((....)).))))....))))))).....))).)))))))))))))))))))))))))))))))))))..	32.49	-76.1
ghy-miRn129	agcuaugaugguugguuugauaca	24	aauugaaccagcuauuugucaaaa	c23872.graph_c0	-	103	352	augaaaugaauuaggcuaaauuaaaaaaauggucccucaacuaugacauagcgagcgcuuguacuaggcauuuuagugcaaaacgucuaauaugccuguuaaaaaacugaauuauuuuucuaacccucguaauugacaccuuguaugaaaguaacauaaaaccaaauugaaccagcuauuugucaaaaauguuauuuuuuugaaagcuaugaugguugguuugauacaguuuagaugaguaaagggguua	250	..(((((((.((((..............(((((......))))).(((.(((....))))))..(((((((.((((.((.....)))))).)))))))........)))).)))))))..(((((((((((...(....)...)))))......(((.((((...(((((((((((((((..(((((((.......))))))).......)))))))))))))))...))))..))).......))))))	32	-50
ghy-miRn130	caggaucuguucuauaggcuc	21	gucugugaauucuugau	c25552.graph_c1	+	0	64	cauuuuuugaccuuacuugaucaggaucuguucuauaggcucgugucugugaauucuugauuuc	64	..................((((((((...((((.((((((....))))))))))))))))))..	37.5	-15.9
ghy-miRn131	auguaacguugccuuaggccuaaa	24	auggcuaaugcgacacuuuacgaa	c22020.graph_c0	-	319	568	uuaaauaugaagaauuauauauauaucacuacuacaaaaugaaacuaaggcaacacugauaaaguguuguauuaaaucuugaaaauguugcauuauggcuaaugcgacacuuuacgaagugccaccuuauguaacguugccuuaggccuaaagcgacacuuu	162	....((((((....)))))).........................(((.((((((((.....)))))))).)))...........((((((.(((.((((((.(((((...((((((((......))).))))).))))).))).)))))).))))))....	32.72	-34.4
ghy-miRn132	auucuccuacacucacaaacacug	24	caauguuuguguguguag	c52104.graph_c0	+	240	489	uuaacuuuugugucuaauuauucuccuacacucacaaacacugcaaagcccacauaucagucccacacuaggucucacaauguuuguguguguagaagaauaauuaggcacaaaaauuaugaggauuuagcauuucucuugcuaaaaagggcauuuugau	160	.(((.(((((((((((((((((((.((((((.((((((((.((....(((....................)))....)).)))))))).)))))).))))))))))))))))))).))).(((((........))))).((((......)))).......	35.62	-52.1
ghy-miRn133	auucccucaaacccuucauug	21	cugaagaguuugggggaacuu	c30938.graph_c0	-	142	391	gauagucaaguguuuuccgaaauucccucaaacccuucauuggaaaaguuugcuaucgauccuuacgaguuugugaacugcauucuacugaagaguuugggggaacuuugggacucacuugacaaaaaaauugcuacagaaacuuguuuaggucaaaacgagguugauuugaauaucauucaaaugguauucauaauuugagucugcaauuauguuuuuaucaaccuuaggucaguuugacugguaagau	250	....((((((((..(((((((.(((((((((((.(((((.(((((.(((((((..(((.......)))....)))))))...))))).))))).))))))))))).)))))))..))))))))...................((((....((((((((((((((((((.((((((((((....))))))))))............(((....)))....)))))))))..))...)))))))..))))..	36	-80.1
ghy-miRn134	aauguaggucccauguuauuugug	24	aaaugacaugagaccuacaugaaa	c31276.graph_c0	+	0	145	caauaaaaagggaaaugauucaccauuauaacuccauccucguuucuaauuuuguugcacucgcaaaugacaugagaccuacaugaaacucauccuauucaauguaggucccauguuauuugugaguguaacaauauaaguuacc	145	.........((((((((......)))).........)))).((..((.((.(((((((((((((((((((((((.((((((((((((..........))).))))))))).))))))))))))))))))))))).)).))..)).	35.17	-54
ghy-miRn135	agacguuaacuggaucggaugugc	24	uguccguuucuaguuaucugaaug	c44592.graph_c0	+	2381	2630	aucguuaucuagggguguaaacagacguuaacuggaucggaugugcuguuucaacaucuuuauccgaaaaguggauuuggauuuauugguguccguuucuaguuaucugaaugugauauuguauccgaauauccguaucugauuauccaauuuuuuuaugacaaaucacaaaaauacauaauaaaagauaauuguugaacaaauauugaaauuucaaaccaaaccaacuauauucaaaacauaauuuaca	250	...(((((....(((((((..((((...((((((((.(((((..((((.......((((..(((((.....)))))..))))....)))))))))..)))))))))))).(((.((((((.......)))))))))....(((((((...((((.(((((................))))).)))))))))))((((........((((....)))).......))))))))))).....))))).....	30	-41.6
ghy-miRn136	acgucugcgagccuugagccccuc	24	gggugcacugguucgcagagguuu	c39322.graph_c0	+	0	224	caggaccagagcuucccugaacccgcguccucguagcuuuucccucgccaagaaauccaagaaacuacucuaaaauuuccuuuuaaggugauaaaagggaauucaagccucacauuuuggcgagagaaaagugaaaggagggggugagagggugcacugguucgcagagguuuuugagacgucugcgagccuugagccccucucauuuuguugauaauuaauua	224	((((...........))))..(((.(.((((....(((((((.((((((((((......(((......)))..((((((((((((......))))))))))))...........)))))))))).)))))))...)))).))))((((((((.((...((((((((((.((((...)))).))))))))))....))))))))))...................	46.43	-89.6
ghy-miRn137	aaagauguggguuucgguaggacc	24	acccacguuggacccauaccucua	c74287.graph_c0	-	0	239	uuauaggacccacguuggacccauaccucuaaaaugcgucgugagugaugauaaaacauuuuuuaggucucuacaucauuuuaauuuuuuguaacgcuuaaauacuccauguggauucauuugacaaauacauuuucauaacauugcaaaaggaaaugauuuaaacagcuaaaaaauguuucaucauuacucacaaaacaauuuaaagauguggguuucgguaggacccuauaguuuuu	239	.((((((..((((...(((((((((.((.((((.((....((((((((((((.(((((((((((((.(...((.((((((((...(((((((((.(.............(((.((.....)).)))...............).))))))))))))))))).))...).))))))))))))).))))))))))))....)).)))).)).)))))))))..)).))..))))))......	31.8	-65.8
ghy-miRn138	aauaagacgugggagcucguaccg	24	agaggaguucucugcucuuauuga	c47455.graph_c0	-	1239	1488	aaccucucaccacccucauccccuucgccaccuccggcccgcaccaugcaaacccguagcaugacgggccacuccaagccacggguaccguuuucccuucaaaccucuaccacuaucacaccucuucccaaaacccuacccgaugccuuagccaguccgguuuggaaccgugccaugcaagaggaguucucugcucuuauugauaauaagacgugggagcucguaccgcgguacccuaauaugaauguca	250	...........((..((((................((((((...(((((.........))))).))))))..((((((((.((((((..(((((...................................)))))..))))))..((....))......))))))))...(((((..((...(.((((((.(((((((((((...))))))).)))))))))).)...)))))))......))))..))..	54.8	-62.44
ghy-miRn139	aucacucugaacuaucugaaaagu	24	uuuucaaauaauccaggguuauaa	c14428.graph_c0	-	169	418	cuguuggcuuuuuauuacaaucaucacucugaacuaucugaaaagugcaaaaacaucaucccuaagagaaggacuuuugugcaguuuuuggauaguuaacugugauaaacguuagccuaagagaugauuuuugugcacuuuucaaauaauccaggguuauaauuguaauaaaaggucaacagaucucaacuugagguuagaguugaccacauauacuaaauuuguaauuuacucuauguuauucuucuaa	250	(((((((((((((((((((((.((.((((((...(((.(((((((((((.(((.((((((.((.((.(...(((.(((((((((((...........)))))).))))).)))..))).)).)))))).))).))))))))))).)))...)))))).)).)))))))))))))))))))))((((((...))))))((((((.((..(((...........)))..)).))))))..............	32	-79.2
ghy-miRn140	auuuaaccccacuaacaaaaacuu	24	uuuuguuagugggguuaaauu	c45864.graph_c0	-	550	799	cccuuaauuaaaaaguuaauagcaacaaagaccaccuuccuguccuauuuuucacuacuuaacuauugaacuacaacaaacaaugaaaaaaaaccuuaaacuuucaacuuuguugucuacacgacuuuuuucuauuaacuuuuuuuguuagugggguuaaauuuuaugacaagucaacggccaacaaggaugccacgucagcauauuuaaccccacuaacaaaaacuuaucagaaaaaaagucacguaga	250	.............(((((((((....((((((.........)))...)))....))).)))))).........(((((((...(((((.............)))))..)))))))(((((..(((((((((((..(((...(((((((((((((((((((((....((((..((....(((..........)))))))))....))))))))))))))))))))).)))..)).)))))))))..)))))	32.4	-58.3

## Sheet: Table S3
Supplementary Table S3. Significant differential expression of miRNAs in gerbera
miR name	miRNA norm count TPM									Expression level	S3 VS S1		S6 VS S3		S6 VS S1
	S1_1	S1_2	S1_3	S3_1	S3_2	S3_3	S6_1	S6_2	S6_3		log2FC	p-value	log2FC	p-value	log2FC	p-value
ghy-miR156	261.275	296.007	199.927	316.371	221.773	247.401	496.339	336.852	250.424	middle					1.70252	0.000935014
ghy-miR162	201604	209537	235455	127697	153217	149578	181635	182761	211127	high					1.02004	0.00171685
ghy-miR164	1366.67	968.749	729.146	3763.15	4130.51	3923.07	3027.67	4641.07	2985.82	middle	2.72706	2.37132e-25			2.92147	2.54949e-16
ghy-miR166a	63992.3	62995.6	61448.2	113944	128670	124450	75815.9	84699.5	73605.3	high	1.72741	4.69949e-17			1.50293	2.57986e-06
ghy-miR166b	63992.3	62995.6	61448.2	113944	128670	124450	75815.9	84699.5	73605.3	high	1.72741	4.69949e-17			1.50293	2.57986e-06
ghy-miR166c	16359.8	11634	13700.9	6960.17	5974	5895.2	2580.97	2732.24	2735.4	high					-1.14105	0.000785013
ghy-miR166d	5788.25	4413.19	4657.13	30738	19211	12765.9	10100.5	37615.1	20342.1	high	2.80282	8.77088e-21			3.16296	1.32098e-20
ghy-miR168	984.806	592.013	1081.96	1332.09	1496.96	1851.97	3275.84	1497.12	2118.97	middle	1.53769	2.12201e-06	1.08106	0.00923565	2.59308	2.54588e-08
ghy-miR319	35513.3	31367.7	27131.3	7060.08	4255.26	3746.35	1563.47	4229.36	1868.55	high	-1.8251	2.83529e-12			-2.47397	2.17307e-13
ghy-miR390	1507.36	1578.7	3104.75	66.6045	41.5823	21.2058	0	0	38.5267	middle	-4.64309	1.19558e-18			-4.95673	2.64502e-10
ghy-miRn10	60.2942	116.609	70.5625	0	0	0	0	0	0	low	-2.90604	0.00383686			-2.31457	0.0442172
ghy-miRn21	1246.08	1444.15	858.51	149.86	138.608	212.058	74.4509	74.8559	38.5267	middle	-1.91788	2.69917e-07			-2.87461	2.09589e-06
ghy-miRn24	20.0981	17.9398	11.7604	1631.81	1524.69	1774.22	26057.8	12575.8	15372.2	high	6.69336	3.60528e-31	3.76124	3.00721e-20	10.2855	1.14462e-57
ghy-miRn33	562.746	636.863	341.052	199.814	41.5823	134.303	24.817	37.428	96.3168	middle	-1.18059	0.0138216			-1.83898	0.0060642
ghy-miRn69	1828.93	3390.62	1987.51	1182.23	526.71	954.259	223.353	374.28	385.267	middle					-1.67086	7.02464e-05
ghy-miRn75	3235.79	3462.38	2152.16	51318.8	36966.7	49734.6	408214	264241	276179	high	4.71285	6.22614e-105	3.15135	2.70044e-17	7.83501	4.89432e-86
ghy-miRn78	4702.95	2628.18	3104.75	832.556	360.38	650.31	99.2679	935.699	462.321	middle	-1.69439	2.31933e-07			-1.76517	7.30291e-05
ghy-miRn84	2050	2816.55	2728.42	715.998	512.849	643.241	124.085	336.852	288.951	middle	-1.23239	1.98356e-05			-2.18016	4.15747e-07
ghy-miRn86	3778.44	3408.56	2481.45	632.743	651.457	417.047	198.536	748.559	462.321	middle	-1.68705	9.53665e-09			-1.67513	1.68041e-05
ghy-miRn88	120.588	152.488	188.167	0	27.7216	21.2058	0	0	0	middle	-1.94462	0.013088			-2.99689	0.00708686
ghy-miRn99	1748.53	1300.64	1658.22	899.161	873.229	1484.4	2754.68	3181.38	3987.52	middle			1.97013	2.95564e-09	2.20357	1.02236e-10
ghy-miRn110	281.373	278.067	176.406	0	41.5823	35.3429	0	37.428	19.2634	middle	-2.03076	0.00292586			-2.17343	0.0154711
ghy-miRn128	7134.82	13661.2	7373.78	2714.13	1677.15	2735.54	74.4509	1384.83	1001.7	middle	-1.15747	1.25138e-05	-1.1493	0.0129961	-2.44423	1.62936e-07
ghy-miRn133	2934.32	2538.48	3575.17	616.092	498.988	579.624	421.889	336.852	385.267	middle	-1.63002	7.9377e-08			-1.71944	3.62352e-05
ghy-miRn139	3235.79	4242.76	3563.41	1248.83	1261.33	1180.45	297.804	973.127	1175.07	middle					-1.07727	0.00374132

## Sheet: Table S4
Supplementary Table S4. Identified and annotated target transcripts for the conserved miRNAs in gerbera
miR name	transcript	transcript annotation	expectation score	target start	target end	target aligned fragment	inhibition
ghy-miR156	c35442.graph_c0	squamosa promoter-binding-like protein 12	1	1133	1153	CGUGCUCUCUCUCUUCUGUCA	Cleavage
ghy-miR156	c42515.graph_c0	squamosa promoter-binding-like protein 10	1	1862	1882	AGUGCUCUCUCUCUUCUGUCA	Cleavage
ghy-miR156	c42674.graph_c0	transcription factor SBP family	1	816	836	UCUGCUCCCUCUCUUCUGUCA	Cleavage
ghy-miR156	c44092.graph_c0	zinc finger, CCHC-type, Gag-polypeptide of LTR copia-type	1	1564	1584	CGUGCUCUCUCUCUUCUGUCA	Cleavage
ghy-miR156	c44312.graph_c0	squamosa promoter-binding-like protein 9	1	984	1004	UGUGCUCUCUCUCUUCUGUCA	Cleavage
ghy-miR156	c25501.graph_c0	squamosa promoter-binding-like protein 12	1.5	1143	1163	CAUGCUUUCUCUCUUCUGUCA	Cleavage
ghy-miR156	c29839.graph_c0	cytochrome P450 85A1-like	2.5	141	161	UUUCUUUAUUCUCUUCUGUCA	Cleavage
ghy-miR156	c50411.graph_c1	uncharacterized protein	2.5	3890	3910	AAUGCUCACUAUUUUUUGUCA	Translation
ghy-miR156	c24987.graph_c0	cylicin-1-like	3	1113	1133	UUUUCUCACUCUUUUCCGUCA	Cleavage
ghy-miR156	c42947.graph_c0	MATE efflux family protein	3	1609	1629	CAUGUUUACUUUCUUCUGUUU	Cleavage
ghy-miR156	c46391.graph_c0	WPP domain-associated protein	3	620	640	AUUGCUCUCUUUUUUUUGUUA	Cleavage
ghy-miR156	c18788.graph_c0	non-symbiotic hemoglobin 2	3.5	200	220	UUUAUUCAUUCUCUUCUUUCA	Cleavage
ghy-miR156	c39015.graph_c0	UDP-glycosyltransferase 73C6-like	3.5	394	414	UUUGCUUUCUUUCUUCUAUCA	Cleavage
ghy-miR156	c41261.graph_c0	peroxisome biogenesis protein 1	3.5	2092	2112	CAUGCUCCUUCUCUUCUGGUA	Cleavage
ghy-miR156	c41268.graph_c0	uncharacterized protein	3.5	996	1016	UUUGCUUACUUUUUUUUUUCA	Cleavage
ghy-miR156	c43217.graph_c0	ABC transporter E family member 2	3.5	330	350	UUUGCUCCCUGUCUUUUGUCG	Translation
ghy-miR156	c46000.graph_c0	DNA damage-binding protein 1	3.5	946	966	UUGGUUCAUUCUCUUCUGGCA	Cleavage
ghy-miR156	c47855.graph_c0	hypothetical protein	3.5	980	1000	UUUGUUUGUUUUCUUUUGUUA	Cleavage
ghy-miR156	c47899.graph_c1	WLM-like protein	3.5	2540	2560	UUUGUUCACCUUUUUUUGUCA	Cleavage
ghy-miR156	c48094.graph_c0	pentatricopeptide repeat-containing protein	3.5	2854	2874	UGUGUUCAAUCUCUUCUGUUU	Cleavage
ghy-miR156	c48115.graph_c2	uncharacterized protein	3.5	2552	2572	GUUGUUCUCUUUCUUCUUUCA	Cleavage
ghy-miR156	c48119.graph_c3	CO(2)-response secreted protease	3.5	1242	1262	UAGGCUAACUCUCUUUUGUCC	Cleavage
ghy-miR156	c50879.graph_c0	hypothetical protein	3.5	732	752	GAUAGUUAUUCUCUUUUGUCA	Cleavage
ghy-miR156	c11704.graph_c0	DEAD-box ATP-dependent RNA helicase 57	4	61	81	AAAACUUAUUCUUUUUUGUCA	Cleavage
ghy-miR156	c12621.graph_c0	RIN4, pathogenic type III effector avirulence factor Avr cleavage site	4	4	24	AAUGAUCAUUCUUUCCUGUUA	Cleavage
ghy-miR156	c35129.graph_c0	uncharacterized protein	4	385	405	UAUGCUAACUCUAUUUUGUUG	Cleavage
ghy-miR156	c35733.graph_c0	LRAT-like domain-containing protein	4	367	387	UAUUUUCAUUCUCUUUUUUCA	Cleavage
ghy-miR156	c36056.graph_c0	growth-regulating factor 1-like	4	452	472	AGAGCUCACUCUUUUCUUUCU	Cleavage
ghy-miR156	c36286.graph_c0	uncharacterized protein	4	1140	1160	CCUGAUUACUCCUUUCUGUUA	Translation
ghy-miR156	c36286.graph_c0	uncharacterized protein	4	1140	1160	CCUGAUUACUCCUUUCUGUUA	Translation
ghy-miR156	c37821.graph_c0	hypothetical protein	4	1213	1233	UCUGUUUAUUUUUUUCUAUCA	Cleavage
ghy-miR156	c38944.graph_c0	guanine nucleotide exchange factor SPIKE 1	4	1054	1074	UAUACAUAUUCUUUUUUGUCA	Cleavage
ghy-miR156	c39455.graph_c0	uncharacterized protein	4	689	709	UAUUGUCGUUUUCUUCUGUUA	Cleavage
ghy-miR156	c40017.graph_c0	cyclic dof factor 1	4	513	533	CGGGUUCGUUUUCUUUUGUCG	Cleavage
ghy-miR156	c40178.graph_c0	transcription factor EMB1444-like	4	1209	1229	UAUUUUCAUUUUUUUUUGUUA	Cleavage
ghy-miR156	c4044.graph_c0	leucine-rich repeat receptor-like protein kinase	4	234	254	CAUGCUCCUUUUUUUCUGACA	Cleavage
ghy-miR156	c44707.graph_c0	mediator of RNA polymerase II transcription subunit 33A-like	4	2282	2302	AAUGCUUUCACUCUUCUGUUG	Cleavage
ghy-miR156	c45138.graph_c0	rve domain-containing protein/RVT_3 domain-containing protein	4	1218	1238	AAUGUCCACACUUUUUUGUCA	Cleavage
ghy-miR156	c45867.graph_c1	RNA-directed DNA polymerase	4	4084	4104	CGUGAUUACACUCUUCUGUCC	Cleavage
ghy-miR156	c46232.graph_c2	Retrovirus-related Pol polyprotein from transposon TNT 1-94	4	873	893	UCUGUUCAUUAUCUCCUGUCA	Translation
ghy-miR156	c46961.graph_c0	hypothetical protein	4	668	688	AUUGUUCGGUCUCUUCUUUCA	Cleavage
ghy-miR156	c47124.graph_c0	WAT1-related protein	4	2033	2053	UAUGCUUACUCUCUUUUCUUC	Cleavage
ghy-miR156	c47467.graph_c2	unnamed protein product	4	4005	4025	UAUAUUUAUUUUCUUUUGUUA	Cleavage
ghy-miR156	c47648.graph_c1	multiple RNA-binding domain-containing protein 1	4	1704	1724	GAUUCUUACUCUUUUUUCUCA	Cleavage
ghy-miR156	c48103.graph_c1	NBS-LRR type resistance protein	4	2241	2261	GAUGUUAACUUUUUUAUGUCA	Cleavage
ghy-miR156	c48674.graph_c0	WPP domain-associated protein	4	1502	1522	UAUGCUUCUUUUCUUCUAUCA	Cleavage
ghy-miR156	c48948.graph_c0	calcium-transporting ATPase 2, plasma membrane-type-like	4	2630	2650	CCGGCUCACUCUCUCCUAUCA	Cleavage
ghy-miR156	c49557.graph_c0	uncharacterized protein	4	5247	5267	GAUGUUCAUACUCUUCUUUCA	Cleavage
ghy-miR156	c49821.graph_c1	DEHYDRATION-INDUCED 19 homolog 4-like	4	2102	2122	UGUGUUCUCUUUCUUUUGACA	Cleavage
ghy-miR156	c55694.graph_c0	hypothetical protein	4	360	380	AUCAAUCACUUUCUUCUGUUA	Cleavage
ghy-miR156	c59090.graph_c0	proteasome assembly chaperone 2	4	420	440	UAUUCUCAUUUUUUUAUGUCA	Cleavage
ghy-miR156	c20660.graph_c0	unnamed protein product	4.5	1964	1984	UAUGUUAAUUUUGUUUUGUCA	Cleavage
ghy-miR156	c23588.graph_c0	cytochrome b561 and DOMON domain-containing protein	4.5	815	835	CGGAAUCGCUCUCUUCUGUCU	Cleavage
ghy-miR156	c24802.graph_c0	Gty37 protein	4.5	43	63	UGUUCUCAUUCUCCUCUUUCA	Cleavage
ghy-miR156	c31924.graph_c0	unnamed protein product	4.5	1201	1221	UAUUAUCACUCUUUUUGGUCA	Cleavage
ghy-miR156	c36695.graph_c0	unnamed protein product	4.5	277	297	AUUGUUUGCUUUCUUCUGUGG	Cleavage
ghy-miR156	c41519.graph_c0	histone acetyltransferase MCC1	4.5	3273	3292	UAU-CUCACUUUCUUUUGCCA	Cleavage
ghy-miR156	c42193.graph_c0	homeobox-leucine zipper protein HAT4	4.5	231	251	UAUUCUCACUCUUCUUUGUCU	Cleavage
ghy-miR156	c45009.graph_c0	DNA/RNA polymerases superfamily protein	4.5	729	749	AAAGUUCAUUUUUUUCUGUUC	Cleavage
ghy-miR156	c45317.graph_c0	cylicin-1-like	4.5	1714	1734	UAUUUUCACUAUCUUCCGUCA	Translation
ghy-miR156	c46104.graph_c0	hydroxycinnamoyl-CoA quinate hydroxycinnamoyl-transferase	4.5	2226	2246	UAUUUUUAUACUCUUUUGUCA	Cleavage
ghy-miR156	c48237.graph_c0	unnamed protein product	4.5	1894	1914	UCACCUCGUUCUCUUUUGUCU	Cleavage
ghy-miR156	c48369.graph_c0	F-box protein At4g02760-like	4.5	3624	3644	UAUGUUCACUUUCUUUUAUUU	Cleavage
ghy-miR156	c48937.graph_c0	F-box protein SKIP8-like	4.5	194	214	AAUUCUCACUCUUAUCUGUUC	Cleavage
ghy-miR156	c48937.graph_c0	F-box protein SKIP8-like	4.5	194	214	AAUUCUCACUCUUAUCUGUUC	Cleavage
ghy-miR156	c11986.graph_c0	auxilin-like protein 1	5	1573	1593	UAUCCUUACUUUCUUCUCUUU	Cleavage
ghy-miR156	c16715.graph_c0	cytochrome P450 87A3-like	5	820	840	UAUUCUCAUGCUCUUCCGUUA	Cleavage
ghy-miR156	c22370.graph_c0	alpha carbonic anhydrase 7-like	5	369	389	UGUGUUCGUUCUUUUGUUUCA	Cleavage
ghy-miR156	c26216.graph_c0	uncharacterized protein	5	2330	2350	UAAGUUUACGUUUUUUUGUCA	Cleavage
ghy-miR156	c26216.graph_c0	uncharacterized protein	5	2330	2350	UAAGUUUACGUUUUUUUGUCA	Cleavage
ghy-miR156	c29781.graph_c0	SHUGOSHIN 2	5	852	872	UAAGUUUGUUCUUUUCUGUAA	Cleavage
ghy-miR156	c30692.graph_c0	DExH-box ATP-dependent RNA helicase DExH12-like	5	7237	7257	UAUGGUCAUUUUCUUCUUCCA	Cleavage
ghy-miR156	c30771.graph_c0	anaphase-promoting complex subunit 5	5	3071	3091	UAUGUUAACUUAUUUUUGUUA	Translation
ghy-miR156	c39303.graph_c1	kinesin-like protein KIN-4A	5	2048	2068	UAUGCUCCCACUCUUUUGCCG	Cleavage
ghy-miR156	c39806.graph_c0	profilin-1	5	603	623	UAUUUUUAUUUUUUUGUGUCA	Cleavage
ghy-miR156	c41775.graph_c0	BTB/POZ domain-containing protein	5	252	271	UAUGCUUAUUUUCUUC-GUCG	Cleavage
ghy-miR156	c42552.graph_c0	glutamate receptor 3.7	5	1470	1490	UAUGAUUACUUAAUUCUGUCA	Translation
ghy-miR156	c43354.graph_c0	hypothetical protein	5	712	732	GAUGUCCGCUUUCUUCUGUAU	Cleavage
ghy-miR156	c45190.graph_c1	centromere/kinetochore protein zw10 homolog	5	1170	1189	UAUGUUCA-UCUCUUCUGGCA	Cleavage
ghy-miR156	c46481.graph_c2	SCAI protein	5	1959	1979	UGUGCUCACUUUUUUUCGCCG	Cleavage
ghy-miR156	c46806.graph_c0	hypothetical protein	5	4864	4884	UAUUUUCAUUCUCUGCUUUCA	Cleavage
ghy-miR156	c47802.graph_c0	hypothetical protein	5	1375	1395	UAUAUUCAUUUUAUUUUGUUA	Cleavage
ghy-miR156	c48608.graph_c0	transcription elongation factor SPT6 homolog	5	3723	3743	UAUGGUCAUCCUUCUCUGUCA	Cleavage
ghy-miR156	c48688.graph_c0	unnamed protein product	5	5244	5264	UGUGCUUAUUUUCAUUUGUUU	Cleavage
ghy-miR156	c49805.graph_c1	hypothetical protein	5	2353	2373	AAUGCUUAUUCUCUUCUGCAG	Cleavage
ghy-miR156	c50495.graph_c0	disease resistance-like protein DSC1	5	93	113	UAUUUUCAUUUUCUUUUCUUA	Cleavage
ghy-miR160a	c44118.graph_c0	auxin response factor 18-like	0.5	1910	1930	UAGCAUGCAGGGAGCCAGGCA	Cleavage
ghy-miR160a	c26644.graph_c1	auxin response factor 18	1	116	136	AAGCAUUCAGGGAGCCAGGCA	Cleavage
ghy-miR160a	c46278.graph_c0	auxin response factor 18-like	1	1988	2008	AAGCAUCCAGGGAGCCAGGCA	Cleavage
ghy-miR160a	c47484.graph_c0	hypothetical protein	3.5	2904	2924	CCUCACCAUCAUCAGGAUUCA	Cleavage
ghy-miR160a	c64229.graph_c0	laccase-1-like	3.5	430	450	AUGGGUAAAGGGGGCCAGGUA	Cleavage
ghy-miR160a	c37194.graph_c0	glutamate-1-semialdehyde 2,1-aminomutase protein	4	901	921	GGGCGGACAGUGGGCCGGGCA	Translation
ghy-miR160a	c42634.graph_c0	methyl-CpG-binding domain-containing protein 9	4	4078	4098	UGGAAUAUUGGGAGUUAGGCA	Cleavage
ghy-miR160a	c44580.graph_c0	chaperonin CPN60-2	4	1160	1180	UAGCAUGCAGCAAGCUAGGCA	Translation
ghy-miR160a	c46548.graph_c0	uncharacterized protein	4	243	263	GUUCAAGCAGAGAGCCAGGCA	Translation
ghy-miR160a	c47878.graph_c0	beta-adaptin-like protein A	4	356	376	CAGCUGGCGGGGAGUCGGGCA	Cleavage
ghy-miR160a	c48321.graph_c0	DEAD-box ATP-dependent RNA helicase 58	4	497	517	UACCAACUAGGGAGCUAGGCA	Cleavage
ghy-miR160a	c51822.graph_c0	hypothetical protein	4	59	79	UUGUUUUCGGGGAGCUGGGCA	Cleavage
ghy-miR160a	c12487.graph_c0	TBC1 domain family member 8B	4.5	529	549	AGGCAUACAGGGAGUUUGAUA	Cleavage
ghy-miR160a	c34347.graph_c0	unnamed protein product	4.5	2336	2356	AGGCGAAAAUGGAGCCAGGCG	Cleavage
ghy-miR160a	c40462.graph_c0	hypothetical protein	4.5	1679	1699	AUCCAUAUGGGUAGUCAGGUA	Translation
ghy-miR160a	c40548.graph_c0	S-locus glycoprotein domain-containing protein	4.5	1742	1762	CUGCAUACAGGGAGCUAGAAA	Cleavage
ghy-miR160a	c40841.graph_c0	chloride channel protein CLC-c-like	4.5	2451	2471	UUGCAUUUAGGGAGCUCGGCC	Cleavage
ghy-miR160a	c41510.graph_c0	patellin-3	4.5	1904	1924	UCAAAUGCGGGGAACCAGGCA	Cleavage
ghy-miR160a	c45106.graph_c0	ATPase ARSA2	4.5	3269	3289	AUGCAUCCAAGAAGUCAGGCA	Translation
ghy-miR160a	c46682.graph_c0	Rubber elongation factor	4.5	1536	1556	AUAGGUACAGGGAGUUGGGUA	Cleavage
ghy-miR160a	c49455.graph_c1	kinesin-like protein KIN-13B	4.5	1758	1778	AAGCAUCCAUGUAGCCGGGCA	Translation
ghy-miR160a	c57798.graph_c0	exocyst complex component	4.5	1303	1323	UCGUAUUCAAGGAGCCUGGCA	Cleavage
ghy-miR160a	c22646.graph_c0	benzoate carboxyl methyltransferase	5	887	907	UGCCAUAAAAGGAACCAGGCA	Cleavage
ghy-miR160a	c26135.graph_c0	GDSL esterase/lipase	5	620	640	UGGUACCCGUGGAGUCAGGCA	Cleavage
ghy-miR160a	c27969.graph_c0	NPTII [synthetic construct]	5	1894	1914	UACACGACGGGGAGUCAGGCA	Cleavage
ghy-miR160a	c34659.graph_c0	hypothetical protein	5	549	569	AAUUAUAUAAGUAGCCAGGCA	Translation
ghy-miR160a	c37779.graph_c0	unnamed protein product	5	374	394	UCGUAUACGGGGAUUUAAGCA	Cleavage
ghy-miR160a	c39889.graph_c0	hypothetical protein	5	1603	1623	UUAUAUACAGCAAGUCAGGCA	Translation
ghy-miR160a	c41768.graph_c0	uncharacterized protein	5	762	782	UUUUGUAUAGGGAGUCGAGCA	Cleavage
ghy-miR160a	c44275.graph_c0	uncharacterized protein	5	250	270	AGGCCUCCAGGCAGCGAGGCA	Translation
ghy-miR160a	c44884.graph_c0	LRR receptor-like serine/threonine-protein kinase FEI 1	5	975	995	CAGCCUACAGGGAGCCAGAAU	Cleavage
ghy-miR160a	c45381.graph_c0	uncharacterized protein	5	3630	3650	GGGCUUACUAGGAGUCAGGUA	Cleavage
ghy-miR160a	c45696.graph_c0	E3 ubiquitin ligase PARAQUAT TOLERANCE 3-like	5	1520	1540	GGGUUCACAGGGGGAUAGGCA	Cleavage
ghy-miR160a	c45868.graph_c1	Dehydrogenase, E1 component	5	737	757	CUCAGUACAGGGAGCCAGGAG	Cleavage
ghy-miR160a	c46683.graph_c0	pectinesterase inhibitor 10-like	5	1086	1106	UUAAAAACAGGGAGCUGGGUG	Cleavage
ghy-miR160a	c47695.graph_c1	unnamed protein product	5	2176	2196	UAGUGUACAGGAAUCCAGGCC	Translation
ghy-miR160a	c48239.graph_c0	uncharacterized protein	5	1644	1664	GGGAGUAGGGGGAGCAAGGUA	Cleavage
ghy-miR160a	c48270.graph_c0	translocase subunit SecA	5	1562	1582	AGGUCUCUAGGGAGCUAGACA	Cleavage
ghy-miR160a	c48372.graph_c0	ATP-dependent zinc metalloprotease FTSH	5	3815	3836	AGGCGUCACGCGGAGCUAGGCA	Cleavage
ghy-miR160a	c48380.graph_c0	F-box/kelch-repeat protein	5	2578	2598	AAGCAUAUCGGGGGCCCGGUG	Cleavage
ghy-miR160a	c88115.graph_c0	unnamed protein product	5	161	181	AUGUAUGUAGGGAGCAAUGUA	Cleavage
ghy-miR160b	c44118.graph_c0	auxin response factor 18-like	0.5	1910	1930	UAGCAUGCAGGGAGCCAGGCA	Cleavage
ghy-miR160b	c26644.graph_c1	auxin response factor 18	1	116	136	AAGCAUUCAGGGAGCCAGGCA	Cleavage
ghy-miR160b	c46278.graph_c0	auxin response factor 18-like	1	1988	2008	AAGCAUCCAGGGAGCCAGGCA	Cleavage
ghy-miR160b	c64229.graph_c0	laccase-1-like	3.5	430	450	AUGGGUAAAGGGGGCCAGGUA	Cleavage
ghy-miR160b	c37194.graph_c0	glutamate-1-semialdehyde 2,1-aminomutase protein	4	901	921	GGGCGGACAGUGGGCCGGGCA	Translation
ghy-miR160b	c42634.graph_c0	methyl-CpG-binding domain-containing protein 9	4	4078	4098	UGGAAUAUUGGGAGUUAGGCA	Cleavage
ghy-miR160b	c44580.graph_c0	chaperonin CPN60-2	4	1160	1180	UAGCAUGCAGCAAGCUAGGCA	Translation
ghy-miR160b	c46548.graph_c0	uncharacterized protein	4	243	263	GUUCAAGCAGAGAGCCAGGCA	Translation
ghy-miR160b	c51822.graph_c0	hypothetical protein	4	59	79	UUGUUUUCGGGGAGCUGGGCA	Cleavage
ghy-miR160b	c12487.graph_c0	TBC1 domain family member 8B	4.5	529	549	AGGCAUACAGGGAGUUUGAUA	Cleavage
ghy-miR160b	c34347.graph_c0	unnamed protein product	4.5	2336	2356	AGGCGAAAAUGGAGCCAGGCG	Cleavage
ghy-miR160b	c40462.graph_c0	hypothetical protein	4.5	1679	1699	AUCCAUAUGGGUAGUCAGGUA	Translation
ghy-miR160b	c40548.graph_c0	S-locus glycoprotein domain-containing protein	4.5	1742	1762	CUGCAUACAGGGAGCUAGAAA	Cleavage
ghy-miR160b	c40841.graph_c0	chloride channel protein CLC-c-like	4.5	2451	2471	UUGCAUUUAGGGAGCUCGGCC	Cleavage
ghy-miR160b	c41510.graph_c0	patellin-3	4.5	1904	1924	UCAAAUGCGGGGAACCAGGCA	Cleavage
ghy-miR160b	c22646.graph_c0	benzoate carboxyl methyltransferase	5	887	907	UGCCAUAAAAGGAACCAGGCA	Cleavage
ghy-miR160b	c26135.graph_c0	GDSL esterase/lipase	5	620	640	UGGUACCCGUGGAGUCAGGCA	Cleavage
ghy-miR160b	c27969.graph_c0	NPTII [synthetic construct]	5	1894	1914	UACACGACGGGGAGUCAGGCA	Cleavage
ghy-miR160b	c33099.graph_c0	brefeldin A-inhibited guanine nucleotide-exchange protein 1	5	862	884	CAUUGCUUACAGGGCUUUAGGCA	Cleavage
ghy-miR160b	c37779.graph_c0	unnamed protein product	5	374	394	UCGUAUACGGGGAUUUAAGCA	Cleavage
ghy-miR160b	c39889.graph_c0	hypothetical protein	5	1603	1623	UUAUAUACAGCAAGUCAGGCA	Translation
ghy-miR160b	c44884.graph_c0	LRR receptor-like serine/threonine-protein kinase FEI 1	5	975	995	CAGCCUACAGGGAGCCAGAAU	Cleavage
ghy-miR160b	c45381.graph_c0	uncharacterized protein	5	3630	3650	GGGCUUACUAGGAGUCAGGUA	Cleavage
ghy-miR160b	c45696.graph_c0	E3 ubiquitin ligase PARAQUAT TOLERANCE 3-like	5	1520	1540	GGGUUCACAGGGGGAUAGGCA	Cleavage
ghy-miR160b	c45868.graph_c1	Dehydrogenase, E1 component	5	737	757	CUCAGUACAGGGAGCCAGGAG	Cleavage
ghy-miR160b	c48372.graph_c0	ATP-dependent zinc metalloprotease FTSH	5	3815	3836	AGGCGUCACGCGGAGCUAGGCA	Cleavage
ghy-miR160c	c44118.graph_c0	auxin response factor 18-like	0.5	1910	1930	UAGCAUGCAGGGAGCCAGGCA	Cleavage
ghy-miR160c	c26644.graph_c1	auxin response factor 18	1	116	136	AAGCAUUCAGGGAGCCAGGCA	Cleavage
ghy-miR160c	c46278.graph_c0	auxin response factor 18-like	1	1988	2008	AAGCAUCCAGGGAGCCAGGCA	Cleavage
ghy-miR160c	c47484.graph_c0	hypothetical protein	3.5	2904	2924	CCUCACCAUCAUCAGGAUUCA	Cleavage
ghy-miR160c	c64229.graph_c0	laccase-1-like	3.5	430	450	AUGGGUAAAGGGGGCCAGGUA	Cleavage
ghy-miR160c	c37194.graph_c0	glutamate-1-semialdehyde 2,1-aminomutase protein	4	901	921	GGGCGGACAGUGGGCCGGGCA	Translation
ghy-miR160c	c42634.graph_c0	methyl-CpG-binding domain-containing protein 9	4	4078	4098	UGGAAUAUUGGGAGUUAGGCA	Cleavage
ghy-miR160c	c44580.graph_c0	chaperonin CPN60-2	4	1160	1180	UAGCAUGCAGCAAGCUAGGCA	Translation
ghy-miR160c	c46548.graph_c0	uncharacterized protein	4	243	263	GUUCAAGCAGAGAGCCAGGCA	Translation
ghy-miR160c	c47878.graph_c0	beta-adaptin-like protein A	4	356	376	CAGCUGGCGGGGAGUCGGGCA	Cleavage
ghy-miR160c	c48321.graph_c0	DEAD-box ATP-dependent RNA helicase 58	4	497	517	UACCAACUAGGGAGCUAGGCA	Cleavage
ghy-miR160c	c51822.graph_c0	hypothetical protein	4	59	79	UUGUUUUCGGGGAGCUGGGCA	Cleavage
ghy-miR160c	c12487.graph_c0	TBC1 domain family member 8B	4.5	529	549	AGGCAUACAGGGAGUUUGAUA	Cleavage
ghy-miR160c	c34347.graph_c0	unnamed protein product	4.5	2336	2356	AGGCGAAAAUGGAGCCAGGCG	Cleavage
ghy-miR160c	c40462.graph_c0	hypothetical protein	4.5	1679	1699	AUCCAUAUGGGUAGUCAGGUA	Translation
ghy-miR160c	c40548.graph_c0	S-locus glycoprotein domain-containing protein	4.5	1742	1762	CUGCAUACAGGGAGCUAGAAA	Cleavage
ghy-miR160c	c40841.graph_c0	chloride channel protein CLC-c-like	4.5	2451	2471	UUGCAUUUAGGGAGCUCGGCC	Cleavage
ghy-miR160c	c41510.graph_c0	patellin-3	4.5	1904	1924	UCAAAUGCGGGGAACCAGGCA	Cleavage
ghy-miR160c	c45106.graph_c0	ATPase ARSA1	4.5	3269	3289	AUGCAUCCAAGAAGUCAGGCA	Translation
ghy-miR160c	c46682.graph_c0	Rubber elongation factor	4.5	1536	1556	AUAGGUACAGGGAGUUGGGUA	Cleavage
ghy-miR160c	c49455.graph_c1	kinesin-like protein KIN-13B	4.5	1758	1778	AAGCAUCCAUGUAGCCGGGCA	Translation
ghy-miR160c	c57798.graph_c0	exocyst complex component	4.5	1303	1323	UCGUAUUCAAGGAGCCUGGCA	Cleavage
ghy-miR160c	c22646.graph_c0	benzoate carboxyl methyltransferase	5	887	907	UGCCAUAAAAGGAACCAGGCA	Cleavage
ghy-miR160c	c26135.graph_c0	GDSL esterase/lipase	5	620	640	UGGUACCCGUGGAGUCAGGCA	Cleavage
ghy-miR160c	c27969.graph_c0	NPTII [synthetic construct]	5	1894	1914	UACACGACGGGGAGUCAGGCA	Cleavage
ghy-miR160c	c34659.graph_c0	hypothetical protein	5	549	569	AAUUAUAUAAGUAGCCAGGCA	Translation
ghy-miR160c	c37779.graph_c0	unnamed protein product	5	374	394	UCGUAUACGGGGAUUUAAGCA	Cleavage
ghy-miR160c	c39889.graph_c0	hypothetical protein	5	1603	1623	UUAUAUACAGCAAGUCAGGCA	Translation
ghy-miR160c	c41768.graph_c0	uncharacterized protein	5	762	782	UUUUGUAUAGGGAGUCGAGCA	Cleavage
ghy-miR160c	c44275.graph_c0	uncharacterized protein	5	250	270	AGGCCUCCAGGCAGCGAGGCA	Translation
ghy-miR160c	c44884.graph_c0	LRR receptor-like serine/threonine-protein kinase FEI 1	5	975	995	CAGCCUACAGGGAGCCAGAAU	Cleavage
ghy-miR160c	c45381.graph_c0	uncharacterized protein	5	3630	3650	GGGCUUACUAGGAGUCAGGUA	Cleavage
ghy-miR160c	c45696.graph_c0	E3 ubiquitin ligase PARAQUAT TOLERANCE 3-like	5	1520	1540	GGGUUCACAGGGGGAUAGGCA	Cleavage
ghy-miR160c	c45868.graph_c1	Dehydrogenase, E1 component	5	737	757	CUCAGUACAGGGAGCCAGGAG	Cleavage
ghy-miR160c	c46683.graph_c0	pectinesterase inhibitor 10-like	5	1086	1106	UUAAAAACAGGGAGCUGGGUG	Cleavage
ghy-miR160c	c47695.graph_c1	unnamed protein product	5	2176	2196	UAGUGUACAGGAAUCCAGGCC	Translation
ghy-miR160c	c48239.graph_c0	uncharacterized protein	5	1644	1664	GGGAGUAGGGGGAGCAAGGUA	Cleavage
ghy-miR160c	c48270.graph_c0	translocase subunit SecA	5	1562	1582	AGGUCUCUAGGGAGCUAGACA	Cleavage
ghy-miR160c	c48372.graph_c0	ATP-dependent zinc metalloprotease FTSH	5	3815	3836	AGGCGUCACGCGGAGCUAGGCA	Cleavage
ghy-miR160c	c48380.graph_c0	F-box/kelch-repeat protein	5	2578	2598	AAGCAUAUCGGGGGCCCGGUG	Cleavage
ghy-miR160c	c88115.graph_c0	unnamed protein product	5	161	181	AUGUAUGUAGGGAGCAAUGUA	Cleavage
ghy-miR160d	c44118.graph_c0	auxin response factor 18-like	0.5	1910	1930	UAGCAUGCAGGGAGCCAGGCA	Cleavage
ghy-miR160d	c26644.graph_c1	auxin response factor 18	1	116	136	AAGCAUUCAGGGAGCCAGGCA	Cleavage
ghy-miR160d	c46278.graph_c0	auxin response factor 18-like	1	1988	2008	AAGCAUCCAGGGAGCCAGGCA	Cleavage
ghy-miR160d	c47484.graph_c0	hypothetical protein	3.5	2904	2924	CCUCACCAUCAUCAGGAUUCA	Cleavage
ghy-miR160d	c64229.graph_c0	laccase-1-like	3.5	430	450	AUGGGUAAAGGGGGCCAGGUA	Cleavage
ghy-miR160d	c37194.graph_c0	glutamate-1-semialdehyde 2,1-aminomutase protein	4	901	921	GGGCGGACAGUGGGCCGGGCA	Translation
ghy-miR160d	c42634.graph_c0	methyl-CpG-binding domain-containing protein 9	4	4078	4098	UGGAAUAUUGGGAGUUAGGCA	Cleavage
ghy-miR160d	c44580.graph_c0	chaperonin CPN60-2	4	1160	1180	UAGCAUGCAGCAAGCUAGGCA	Translation
ghy-miR160d	c46548.graph_c0	uncharacterized protein	4	243	263	GUUCAAGCAGAGAGCCAGGCA	Translation
ghy-miR160d	c47878.graph_c0	beta-adaptin-like protein A	4	356	376	CAGCUGGCGGGGAGUCGGGCA	Cleavage
ghy-miR160d	c48321.graph_c0	DEAD-box ATP-dependent RNA helicase 58	4	497	517	UACCAACUAGGGAGCUAGGCA	Cleavage
ghy-miR160d	c51822.graph_c0	hypothetical protein	4	59	79	UUGUUUUCGGGGAGCUGGGCA	Cleavage
ghy-miR160d	c12487.graph_c0	TBC1 domain family member 8B	4.5	529	549	AGGCAUACAGGGAGUUUGAUA	Cleavage
ghy-miR160d	c34347.graph_c0	unnamed protein product	4.5	2336	2356	AGGCGAAAAUGGAGCCAGGCG	Cleavage
ghy-miR160d	c40462.graph_c0	hypothetical protein	4.5	1679	1699	AUCCAUAUGGGUAGUCAGGUA	Translation
ghy-miR160d	c40548.graph_c0	S-locus glycoprotein domain-containing protein	4.5	1742	1762	CUGCAUACAGGGAGCUAGAAA	Cleavage
ghy-miR160d	c40841.graph_c0	chloride channel protein CLC-c-like	4.5	2451	2471	UUGCAUUUAGGGAGCUCGGCC	Cleavage
ghy-miR160d	c41510.graph_c0	patellin-3	4.5	1904	1924	UCAAAUGCGGGGAACCAGGCA	Cleavage
ghy-miR160d	c45106.graph_c0	ATPase ARSA3	4.5	3269	3289	AUGCAUCCAAGAAGUCAGGCA	Translation
ghy-miR160d	c46682.graph_c0	Rubber elongation factor	4.5	1536	1556	AUAGGUACAGGGAGUUGGGUA	Cleavage
ghy-miR160d	c49455.graph_c1	kinesin-like protein KIN-13B	4.5	1758	1778	AAGCAUCCAUGUAGCCGGGCA	Translation
ghy-miR160d	c57798.graph_c0	exocyst complex component	4.5	1303	1323	UCGUAUUCAAGGAGCCUGGCA	Cleavage
ghy-miR160d	c22646.graph_c0	benzoate carboxyl methyltransferase	5	887	907	UGCCAUAAAAGGAACCAGGCA	Cleavage
ghy-miR160d	c26135.graph_c0	GDSL esterase/lipase	5	620	640	UGGUACCCGUGGAGUCAGGCA	Cleavage
ghy-miR160d	c27969.graph_c0	NPTII [synthetic construct]	5	1894	1914	UACACGACGGGGAGUCAGGCA	Cleavage
ghy-miR160d	c34659.graph_c0	hypothetical protein	5	549	569	AAUUAUAUAAGUAGCCAGGCA	Translation
ghy-miR160d	c37779.graph_c0	unnamed protein product	5	374	394	UCGUAUACGGGGAUUUAAGCA	Cleavage
ghy-miR160d	c39889.graph_c0	hypothetical protein	5	1603	1623	UUAUAUACAGCAAGUCAGGCA	Translation
ghy-miR160d	c41768.graph_c0	uncharacterized protein	5	762	782	UUUUGUAUAGGGAGUCGAGCA	Cleavage
ghy-miR160d	c44275.graph_c0	uncharacterized protein	5	250	270	AGGCCUCCAGGCAGCGAGGCA	Translation
ghy-miR160d	c44884.graph_c0	LRR receptor-like serine/threonine-protein kinase FEI 1	5	975	995	CAGCCUACAGGGAGCCAGAAU	Cleavage
ghy-miR160d	c45381.graph_c0	uncharacterized protein	5	3630	3650	GGGCUUACUAGGAGUCAGGUA	Cleavage
ghy-miR160d	c45696.graph_c0	E3 ubiquitin ligase PARAQUAT TOLERANCE 3-like	5	1520	1540	GGGUUCACAGGGGGAUAGGCA	Cleavage
ghy-miR160d	c45868.graph_c1	Dehydrogenase, E1 component	5	737	757	CUCAGUACAGGGAGCCAGGAG	Cleavage
ghy-miR160d	c46683.graph_c0	pectinesterase inhibitor 10-like	5	1086	1106	UUAAAAACAGGGAGCUGGGUG	Cleavage
ghy-miR160d	c47695.graph_c1	unnamed protein product	5	2176	2196	UAGUGUACAGGAAUCCAGGCC	Translation
ghy-miR160d	c48239.graph_c0	uncharacterized protein	5	1644	1664	GGGAGUAGGGGGAGCAAGGUA	Cleavage
ghy-miR160d	c48270.graph_c0	translocase subunit SecA	5	1562	1582	AGGUCUCUAGGGAGCUAGACA	Cleavage
ghy-miR160d	c48372.graph_c0	ATP-dependent zinc metalloprotease FTSH	5	3815	3836	AGGCGUCACGCGGAGCUAGGCA	Cleavage
ghy-miR160d	c48380.graph_c0	F-box/kelch-repeat protein	5	2578	2598	AAGCAUAUCGGGGGCCCGGUG	Cleavage
ghy-miR160d	c88115.graph_c0	unnamed protein product	5	161	181	AUGUAUGUAGGGAGCAAUGUA	Cleavage
ghy-miR160e	c44118.graph_c0	auxin response factor 18-like	0.5	1910	1930	UAGCAUGCAGGGAGCCAGGCA	Cleavage
ghy-miR160e	c26644.graph_c1	auxin response factor 18	1	116	136	AAGCAUUCAGGGAGCCAGGCA	Cleavage
ghy-miR160e	c46278.graph_c0	auxin response factor 18-like	1	1988	2008	AAGCAUCCAGGGAGCCAGGCA	Cleavage
ghy-miR160e	c47484.graph_c0	hypothetical protein	3.5	2904	2924	CCUCACCAUCAUCAGGAUUCA	Cleavage
ghy-miR160e	c64229.graph_c0	laccase-1-like	3.5	430	450	AUGGGUAAAGGGGGCCAGGUA	Cleavage
ghy-miR160e	c37194.graph_c0	glutamate-1-semialdehyde 2,1-aminomutase protein	4	901	921	GGGCGGACAGUGGGCCGGGCA	Translation
ghy-miR160e	c42634.graph_c0	methyl-CpG-binding domain-containing protein 9	4	4078	4098	UGGAAUAUUGGGAGUUAGGCA	Cleavage
ghy-miR160e	c44580.graph_c0	chaperonin CPN60-2	4	1160	1180	UAGCAUGCAGCAAGCUAGGCA	Translation
ghy-miR160e	c46548.graph_c0	uncharacterized protein	4	243	263	GUUCAAGCAGAGAGCCAGGCA	Translation
ghy-miR160e	c47878.graph_c0	beta-adaptin-like protein A	4	356	376	CAGCUGGCGGGGAGUCGGGCA	Cleavage
ghy-miR160e	c48321.graph_c0	DEAD-box ATP-dependent RNA helicase 58	4	497	517	UACCAACUAGGGAGCUAGGCA	Cleavage
ghy-miR160e	c51822.graph_c0	hypothetical protein	4	59	79	UUGUUUUCGGGGAGCUGGGCA	Cleavage
ghy-miR160e	c12487.graph_c0	TBC1 domain family member 8B	4.5	529	549	AGGCAUACAGGGAGUUUGAUA	Cleavage
ghy-miR160e	c34347.graph_c0	unnamed protein product	4.5	2336	2356	AGGCGAAAAUGGAGCCAGGCG	Cleavage
ghy-miR160e	c40462.graph_c0	hypothetical protein	4.5	1679	1699	AUCCAUAUGGGUAGUCAGGUA	Translation
ghy-miR160e	c40548.graph_c0	S-locus glycoprotein domain-containing protein	4.5	1742	1762	CUGCAUACAGGGAGCUAGAAA	Cleavage
ghy-miR160e	c40841.graph_c0	chloride channel protein CLC-c-like	4.5	2451	2471	UUGCAUUUAGGGAGCUCGGCC	Cleavage
ghy-miR160e	c41510.graph_c0	patellin-3	4.5	1904	1924	UCAAAUGCGGGGAACCAGGCA	Cleavage
ghy-miR160e	c45106.graph_c0	ATPase ARSA4	4.5	3269	3289	AUGCAUCCAAGAAGUCAGGCA	Translation
ghy-miR160e	c46682.graph_c0	Rubber elongation factor	4.5	1536	1556	AUAGGUACAGGGAGUUGGGUA	Cleavage
ghy-miR160e	c49455.graph_c1	kinesin-like protein KIN-13B	4.5	1758	1778	AAGCAUCCAUGUAGCCGGGCA	Translation
ghy-miR160e	c57798.graph_c0	exocyst complex component	4.5	1303	1323	UCGUAUUCAAGGAGCCUGGCA	Cleavage
ghy-miR160e	c22646.graph_c0	benzoate carboxyl methyltransferase	5	887	907	UGCCAUAAAAGGAACCAGGCA	Cleavage
ghy-miR160e	c26135.graph_c0	GDSL esterase/lipase	5	620	640	UGGUACCCGUGGAGUCAGGCA	Cleavage
ghy-miR160e	c27969.graph_c0	NPTII [synthetic construct]	5	1894	1914	UACACGACGGGGAGUCAGGCA	Cleavage
ghy-miR160e	c34659.graph_c0	hypothetical protein	5	549	569	AAUUAUAUAAGUAGCCAGGCA	Translation
ghy-miR160e	c37779.graph_c0	unnamed protein product	5	374	394	UCGUAUACGGGGAUUUAAGCA	Cleavage
ghy-miR160e	c39889.graph_c0	hypothetical protein	5	1603	1623	UUAUAUACAGCAAGUCAGGCA	Translation
ghy-miR160e	c41768.graph_c0	uncharacterized protein	5	762	782	UUUUGUAUAGGGAGUCGAGCA	Cleavage
ghy-miR160e	c44275.graph_c0	uncharacterized protein	5	250	270	AGGCCUCCAGGCAGCGAGGCA	Translation
ghy-miR160e	c44884.graph_c0	LRR receptor-like serine/threonine-protein kinase FEI 1	5	975	995	CAGCCUACAGGGAGCCAGAAU	Cleavage
ghy-miR160e	c45381.graph_c0	uncharacterized protein	5	3630	3650	GGGCUUACUAGGAGUCAGGUA	Cleavage
ghy-miR160e	c45696.graph_c0	E3 ubiquitin ligase PARAQUAT TOLERANCE 3-like	5	1520	1540	GGGUUCACAGGGGGAUAGGCA	Cleavage
ghy-miR160e	c45868.graph_c1	Dehydrogenase, E1 component	5	737	757	CUCAGUACAGGGAGCCAGGAG	Cleavage
ghy-miR160e	c46683.graph_c0	pectinesterase inhibitor 10-like	5	1086	1106	UUAAAAACAGGGAGCUGGGUG	Cleavage
ghy-miR160e	c47695.graph_c1	unnamed protein product	5	2176	2196	UAGUGUACAGGAAUCCAGGCC	Translation
ghy-miR160e	c48239.graph_c0	uncharacterized protein	5	1644	1664	GGGAGUAGGGGGAGCAAGGUA	Cleavage
ghy-miR160e	c48270.graph_c0	translocase subunit SecA	5	1562	1582	AGGUCUCUAGGGAGCUAGACA	Cleavage
ghy-miR160e	c48372.graph_c0	ATP-dependent zinc metalloprotease FTSH	5	3815	3836	AGGCGUCACGCGGAGCUAGGCA	Cleavage
ghy-miR160e	c48380.graph_c0	F-box/kelch-repeat protein	5	2578	2598	AAGCAUAUCGGGGGCCCGGUG	Cleavage
ghy-miR160e	c88115.graph_c0	unnamed protein product	5	161	181	AUGUAUGUAGGGAGCAAUGUA	Cleavage
ghy-miR162	c25152.graph_c0	unnamed protein product	3	469	489	CUCGGUGAAGAGGUUUAUUGG	Cleavage
ghy-miR162	c45932.graph_c0	unnamed protein product	3	467	487	GAGGUUGCUGAGGUUUAUUGG	Cleavage
ghy-miR162	c30888.graph_c0	F-box protein PP2-A13-like	3.5	1088	1107	GAAGAU-CAGAGGUUUAUUGG	Cleavage
ghy-miR162	c35921.graph_c0	hypothetical protein	3.5	227	247	GCUCGAUGAUCGAUUUGUUUU	Cleavage
ghy-miR162	c40574.graph_c0	reverse transcriptase zinc-binding domain-containing protein	3.5	116	136	CUGGCUGCGGGGGUUUAUUGC	Cleavage
ghy-miR162	c45431.graph_c0	extensin-3-like	3.5	698	718	CCAGAUUCAGGGGUUUGUUGG	Cleavage
ghy-miR162	c12562.graph_c0	phosphoenolpyruvate carboxylase kinase 2-like	4	79	99	CAGGAUGUGGAGGAUUUUCGG	Cleavage
ghy-miR162	c20840.graph_c0	U-box domain-containing protein 4-like	4	1295	1315	CAAGAAACAGAGGUUUGUUGG	Cleavage
ghy-miR162	c25339.graph_c0	hypothetical protein	4	1653	1673	GAAAAAGUGGAGGUUUAUCGG	Cleavage
ghy-miR162	c27803.graph_c0	RNA-directed DNA polymerase	4	53	73	AAGGAAGCAAAGGUUUAUCAG	Cleavage
ghy-miR162	c29782.graph_c0	hypothetical protein	4	426	446	UGGGAUUCAGGGGUUUAUCCC	Cleavage
ghy-miR162	c30697.graph_c0	hypothetical protein	4	642	662	UUGGAUCUAGAUGUUUAUCGU	Translation
ghy-miR162	c31326.graph_c0	kinesin-like protein KIN-14L	4	2732	2752	CAACCUUUGGAACAGACCCUG	Cleavage
ghy-miR162	c39390.graph_c0	Brix domain-containing protein	4	1362	1382	ACCGCUGCAGAGGUUUGUGGG	Cleavage
ghy-miR162	c41147.graph_c1	endoribonuclease Dicer homolog 1	4	3635	3656	CUGGAUGCAGAGGUGUUAUCGA	Cleavage
ghy-miR162	c42140.graph_c0	IQ-DOMAIN 14-like	4	1207	1227	GAUGGUUUAGAGGUUUGUUGG	Cleavage
ghy-miR162	c46588.graph_c2	RNA-directed DNA polymerase	4	1333	1353	UUGGGUACGGAGGCUUAUUGG	Cleavage
ghy-miR162	c47572.graph_c0	unnamed protein product	4	1484	1504	CAGGAUGUAGAGCUUGAUUGG	Cleavage
ghy-miR162	c57671.graph_c0	uncharacterized protein	4	390	410	AAGGAUGUAGGGGUUGAUUGU	Cleavage
ghy-miR162	c11699.graph_c0	L-ascorbate peroxidase 6	4.5	452	472	UUGAUUGGAGAGGCUUAUCGG	Cleavage
ghy-miR162	c13441.graph_c0	uncharacterized protein	4.5	313	333	CGGGAUCUAGCGGUUUAACGG	Translation
ghy-miR162	c16914.graph_c0	uncharacterized protein	4.5	441	461	AGCGAUUCGGAGGUUUCUUGG	Cleavage
ghy-miR162	c25801.graph_c1	chromatin modification-related protein EAF1 B-like	4.5	34	54	UUCCAGGCAGAGGUUUACCGG	Cleavage
ghy-miR162	c30600.graph_c0	unnamed protein product	4.5	373	393	GUGUAUGUCGAGGUUUAUUGU	Cleavage
ghy-miR162	c32442.graph_c0	CUP-SHAPED COTYLEDON 3	4.5	573	593	UUAAUGUGCCUUUCUUCUCCC	Cleavage
ghy-miR162	c37510.graph_c0	aldehyde oxidase GLOX-like	4.5	1261	1281	GGGGGUGCACAGGUUUGUUUG	Cleavage
ghy-miR162	c41427.graph_c1	membrane-associated kinase regulator 6	4.5	189	209	AAUGAUUCAGAGGUUUGAUGG	Cleavage
ghy-miR162	c42106.graph_c0	dynamin-related protein 4C-like	4.5	2184	2204	AGGGAUGUGGGGGUUGGUCGU	Cleavage
ghy-miR162	c46315.graph_c1	pentatricopeptide repeat-containing protein	4.5	1732	1752	UUCUAUGAAGAGGUUUAUUGC	Cleavage
ghy-miR162	c48021.graph_c0	kinesin-like protein KIN-14S	4.5	2368	2388	GCAGGCGCGGAGGUUUAUGGG	Cleavage
ghy-miR162	c48051.graph_c1	callose synthase 8	4.5	1947	1967	UCCGGUUUAGAUGUUUAUCGG	Translation
ghy-miR162	c49060.graph_c2	unnamed protein product	4.5	1117	1137	GAGGAUGUGGAGGAUUUUUGG	Cleavage
ghy-miR162	c49664.graph_c0	Plastid lipid-associated protein/fibrillin conserved domain-containing protein	4.5	672	692	GUGGAUGUGGAGGUUAUUUGG	Cleavage
ghy-miR162	c49944.graph_c0	uncharacterized protein	4.5	568	588	UGGGAUCUAGGGUUUUAUCGA	Cleavage
ghy-miR162	c50201.graph_c0	G-type lectin S-receptor-like serine/threonine-protein kinase	4.5	3139	3162	CCGAUUGCUUGAUCUGCAGCUAUG	Cleavage
ghy-miR162	c51795.graph_c0	unnamed protein product	4.5	141	161	UUGGAUCCAGGGGGUUAUCUG	Cleavage
ghy-miR162	c63897.graph_c0	unnamed protein product	4.5	117	137	ACGGAAGCGGUGGUUUGUCGU	Translation
ghy-miR162	c12545.graph_c0	dnaJ protein ERDJ2A-like	5	2000	2020	CUGGAUCUGGAUUUUUAUCGG	Translation
ghy-miR162	c18690.graph_c0	3-oxoacyl-[acyl-carrier-protein] synthase II,	5	413	433	UUGCGUGCAGAGCUUUGUCAG	Cleavage
ghy-miR162	c22919.graph_c0	unnamed protein product	5	160	184	UGUGGAGAGGUUUAACGUGUUUGAU	Cleavage
ghy-miR162	c26635.graph_c0	ABC transporter B family member 19-like	5	21	41	UUGGUGGCAGAGGUUUGGCGC	Cleavage
ghy-miR162	c30507.graph_c0	E3 ubiquitin-protein ligase SINA-like 9	5	635	654	GUGGAGGUAGAGGUUU-UUGG	Cleavage
ghy-miR162	c36148.graph_c0	uncharacterized protein	5	515	535	GUGGGUGCGGGGGUUGGUUGC	Cleavage
ghy-miR162	c37709.graph_c0	uncharacterized protein	5	782	805	UUUGACUUCAACGUGUUGCUUCAU	Cleavage
ghy-miR162	c39074.graph_c1	uncharacterized protein	5	2712	2732	UGACAUGCAGUGGUCUAUCGG	Translation
ghy-miR162	c40930.graph_c0	hypothetical protein	5	798	818	UUUGAUUCAGAGGUGUGUCGU	Cleavage
ghy-miR162	c43137.graph_c0	transcription factor TGA1-like	5	511	531	GUGUAUACGGGGGUUUGUUGA	Cleavage
ghy-miR162	c44042.graph_c3	hypothetical protein	5	1192	1212	UUGGGUGCGGCGAUUUGUUGG	Translation
ghy-miR162	c45636.graph_c0	uncharacterized protein	5	534	554	AAUCUUGCAGGGGUUUAUCAG	Cleavage
ghy-miR162	c46884.graph_c0	zinc finger CCCH domain-containing protein 19-like	5	2829	2849	AUGUGGCAUUAUAAGGAUCCU	Cleavage
ghy-miR162	c48390.graph_c0	pectinesterase-like	5	1012	1032	GACGAUGUUGAUGUUUGUCGG	Translation
ghy-miR162	c49043.graph_c1	uncharacterized protein	5	383	403	CUGGAUUCGGAGGUGCAUUGG	Cleavage
ghy-miR162	c49173.graph_c0	TIFY 4B-like protein	5	1613	1634	GCAGUACACACAUACAUACAUA	Cleavage
ghy-miR162	c49444.graph_c3	heptahelical transmembrane protein 1-like	5	768	788	UUGGAUAUAGAGUUUGAUUGG	Cleavage
ghy-miR162	c49643.graph_c0	apoptosis inhibitor 5-like protein API5	5	6263	6283	GAAGAUGCGAAGGUUUAUUCG	Cleavage
ghy-miR162	c50263.graph_c0	RNA-directed DNA polymerase	5	1230	1251	UUGGAUGCACAUGGUUUAUUGG	Translation
ghy-miR162	c50428.graph_c0	gag-pol fusion protein	5	775	795	UUGGCUGAAGAAUUUUAUCGG	Translation
ghy-miR162	c54513.graph_c0	hypothetical protein	5	1165	1185	CGGUUUAUUCCUCCUAGGCUU	Cleavage
ghy-miR162	c66227.graph_c0	hypothetical protein	5	151	171	UUGGGUACAGAGGCUUCUUGG	Cleavage
ghy-miR162	c72841.graph_c0	hypothetical protein	5	250	270	AGAAGGGCAGAGGUUUGUUGG	Cleavage
ghy-miR164	c35860.graph_c0	NAC domain-containing protein 100-like	0	906	926	UUCACGUGCCCUGCUUCUCCA	Cleavage
ghy-miR164	c35087.graph_c0	CUP-SHAPED COTYLEDON 2-like	0.5	3	23	AGCACGUGCCCUGUUUCUCCA	Cleavage
ghy-miR164	c43436.graph_c0	CUP-SHAPED COTYLEDON 2-like	0.5	1053	1073	AGCACGUGCCCUGUUUCUCCA	Cleavage
ghy-miR164	c23229.graph_c0	NAC domain-containing protein 79-like	1	492	512	UUGACGUGCCCUGCUUCUCCA	Cleavage
ghy-miR164	c28305.graph_c0	NAC domain-containing protein 21/22	1	353	373	AGCAAGUGCCCUGCUUCUCCA	Cleavage
ghy-miR164	c39691.graph_c0	NAC domain-containing protein 92-like	2	785	805	CACACGUGACCUGCUUCUCCG	Cleavage
ghy-miR164	c33524.graph_c0	vesicle-associated protein 1-3-like	2.5	1294	1314	AACAUGUGCUUUGUUUCUUCA	Cleavage
ghy-miR164	c18088.graph_c0	dual specificity protein phosphatase DSP8	3	437	457	AACAUGAGCCCUGCUUCUGCA	Cleavage
ghy-miR164	c30658.graph_c0	pentatricopeptide repeat-containing protein	3	705	725	AACACCUUCUCUGCUUCUUCA	Cleavage
ghy-miR164	c45775.graph_c0	transcription termination factor MTERF2	3	1381	1401	GAUAUGUUCCUUGCUUCUUCA	Cleavage
ghy-miR164	c49516.graph_c1	E3 ubiquitin-protein ligase ARI2	3	960	980	GCCUCAUGCCCUGCUUCUUUA	Cleavage
ghy-miR164	c17890.graph_c0	jasmonate-zim-domain protein 8	3.5	319	339	ACCAGGUGUUCUACUUCUCCA	Cleavage
ghy-miR164	c24723.graph_c0	unnamed protein product	3.5	724	744	GAUACGUGCCAUGUUUCUCCU	Translation
ghy-miR164	c24723.graph_c0	unnamed protein product	3.5	724	744	GAUACGUGCCAUGUUUCUCCU	Translation
ghy-miR164	c30136.graph_c1	Protein kinase, catalytic domain-containing protein	3.5	777	797	GCCACGUGACUUGCUUCUCAA	Cleavage
ghy-miR164	c33497.graph_c0	hypothetical protein	3.5	346	366	CGUGCGUAUCCUGCUUCUUUA	Cleavage
ghy-miR164	c36563.graph_c0	RNA-directed DNA polymerase	3.5	152	172	GAAACAUGCCUUGUUUUUCCA	Cleavage
ghy-miR164	c41739.graph_c0	COP9 signalosome complex subunit 2	3.5	48	68	ACCGCUUGCCCUGCUUUUACA	Cleavage
ghy-miR164	c42718.graph_c1	uncharacterized protein	3.5	2124	2144	AACAUGUUUUUUGCUUCUUCA	Cleavage
ghy-miR164	c44110.graph_c0	uncharacterized protein	3.5	291	311	AGUAUCAGCCCUGUUUCUCCA	Cleavage
ghy-miR164	c45205.graph_c0	NAD kinase 2	3.5	1581	1601	UUGACCUGCCUUGUUUUUCCA	Cleavage
ghy-miR164	c46256.graph_c0	heat shock cognate 70 kDa protein-like	3.5	1048	1068	AACAUGUUCCCAGUUUCUCCA	Translation
ghy-miR164	c46293.graph_c0	uncharacterized protein	3.5	966	986	UCGACGUUCCCUGUUUCUCCU	Cleavage
ghy-miR164	c46373.graph_c3	uncharacterized protein	3.5	3849	3869	GAUAUAUGCCCUGCUUCCCCA	Cleavage
ghy-miR164	c46662.graph_c0	uncharacterized protein	3.5	2243	2263	UUCAUAUCCCCUGUUUCUUCA	Cleavage
ghy-miR164	c46835.graph_c0	acyl-coenzyme A oxidase 4	3.5	134	154	CCCACGUGUCCUCCUUCUCUC	Cleavage
ghy-miR164	c47423.graph_c1	uncharacterized protein	3.5	122	142	ACCACUUGUCCUGCUCCUUCA	Cleavage
ghy-miR164	c50022.graph_c0	myosin-13	3.5	1607	1627	ACGGCGUGCUUUGCUUCUUCG	Cleavage
ghy-miR164	c50332.graph_c0	TMV resistance protein N-like	3.5	3603	3623	AUCAUGUGUCUUCCUUCUUCA	Cleavage
ghy-miR164	c61743.graph_c0	Retrovirus-related Pol polyprotein from transposon TNT 1-94	3.5	288	308	CACUCGAGCCUUGCUUUUUCA	Cleavage
ghy-miR164	c90230.graph_c0	3-ketoacyl-CoA reductase 1	3.5	17	37	CGCCGGUGCCCUGCGUCUCCA	Cleavage
ghy-miR164	c13810.graph_c0	FREE1-like protein	4	70	90	CACACGUCCCCUGCAUCUUCU	Cleavage
ghy-miR164	c19397.graph_c0	receptor protein kinase ZmPK1	4	185	205	AAAAUGCGUUUUGCUUCUCCA	Cleavage
ghy-miR164	c33072.graph_c0	tetratricopeptide repeat (TPR)-like superfamily protein	4	925	945	UCCACGUGACCCGUUUUUCCA	Translation
ghy-miR164	c35328.graph_c0	uncharacterized protein	4	3	23	CCCACGUGCUCUGUUUUCCCC	Cleavage
ghy-miR164	c37502.graph_c0	MO25-like protein	4	9	29	AAAAUAUGCUUUGCUUUUCCA	Cleavage
ghy-miR164	c39874.graph_c0	hypothetical protein	4	753	775	UCCAUGGCUGCCUUGCUUCUCCG	Cleavage
ghy-miR164	c42260.graph_c0	cycloidea-like 5	4	1063	1082	AGCAC-UGCUUUGUUUCUUCA	Cleavage
ghy-miR164	c42487.graph_c0	arginine/serine-rich coiled-coil protein 2	4	216	235	GGCA-GUGUACUGCUUCUCCA	Cleavage
ghy-miR164	c43434.graph_c3	uncharacterized protein	4	422	442	UGGACGGGUCUUGCUUCUUUA	Cleavage
ghy-miR164	c44127.graph_c0	RING-H2 finger protein ATL7-like	4	777	797	UGCACGUGUCCUGUUUGUCGA	Cleavage
ghy-miR164	c44185.graph_c0	hypothetical protein	4	1662	1682	GCAACGAGUCCUGCAUCUCCA	Cleavage
ghy-miR164	c44314.graph_c0	pre-rRNA-processing protein TSR1 homolog	4	874	894	UGUAUGUGUCAUGCUUCUUUA	Translation
ghy-miR164	c45012.graph_c3	guanylate-binding protein 1-like	4	1071	1091	AGCGCAUUCUUUGCUUCUCUA	Cleavage
ghy-miR164	c45086.graph_c0	glycosyltransferase	4	533	553	UCGACAUGUUUUGCUUCUCCG	Cleavage
ghy-miR164	c46333.graph_c0	uncharacterized protein	4	624	644	UUCUUGUGCUCCGCUUCUUCA	Translation
ghy-miR164	c46575.graph_c0	magnesium transporter MRS2-I	4	2023	2043	UCGCCGUGCCCUUCUUCUUCA	Cleavage
ghy-miR164	c47829.graph_c0	serine/threonine-protein kinase TIO	4	2334	2354	UCCAUGUGCCCUGGUUCACUA	Cleavage
ghy-miR164	c50057.graph_c0	hypothetical protein	4	9583	9603	GACAUGUUUCCUGUUUCUUCU	Cleavage
ghy-miR164	c50146.graph_c0	hypothetical protein	4	552	572	UGUUUGUUUCUUGCUUCUCCA	Cleavage
ghy-miR164	c60772.graph_c0	Retrovirus-related Pol polyprotein from transposon RE1	4	256	276	CGACCGUUUCUUGCUUCUCCA	Cleavage
ghy-miR164	c63713.graph_c0	hypothetical protein	4	105	125	AGCAACUGUCUUGUUUCUCUA	Cleavage
ghy-miR164	c63809.graph_c0	Retrovirus-related Pol polyprotein from transposon TNT 1-94	4	198	218	UGCACCUGUUUUGGUUCUCCA	Cleavage
ghy-miR164	c11586.graph_c0	4-coumarate--CoA ligase-like 9	4.5	252	272	GGUACUUGCCCUGCUUCAUCU	Cleavage
ghy-miR164	c11711.graph_c0	U-box domain-containing protein 3-like	4.5	177	197	AGCAUUUGCUUUGCGUUUCCA	Cleavage
ghy-miR164	c24192.graph_c0	ankyrin repeat-containing protein	4.5	1604	1624	AGGACGUGUCUUGCUUAUCCU	Cleavage
ghy-miR164	c25605.graph_c1	signal recognition particle 19 kDa protein-like	4.5	256	275	UGCAGGU-UCCUGUUUCUUCA	Cleavage
ghy-miR164	c26251.graph_c0	two-component response regulator ORR21-like	4.5	534	554	AGCACCUGACCUGUUUCACCA	Cleavage
ghy-miR164	c30783.graph_c0	MO25-like protein	4.5	147	167	UGGUUGUGCUUUGUUUUUCCA	Cleavage
ghy-miR164	c32442.graph_c0	CUP-SHAPED COTYLEDON 3	4.5	573	593	UUAAUGUGCCUUUCUUCUCCC	Cleavage
ghy-miR164	c40449.graph_c0	serine/threonine-protein kinase WAG1-like	4.5	309	329	AGCAUGUGCCCUACUACUCCU	Cleavage
ghy-miR164	c40646.graph_c0	folate-biopterin transporter 3	4.5	1360	1380	GGCACGUUCUUUGCUUUACUA	Cleavage
ghy-miR164	c40773.graph_c0	major facilitator superfamily protein	4.5	1072	1092	AGCACAUGUACAGCUUCUCCA	Translation
ghy-miR164	c41180.graph_c0	origin of replication complex subunit 6	4.5	1	19	GCCGUGCCCUGGUUUUUCA	Cleavage
ghy-miR164	c41603.graph_c0	uncharacterized protein	4.5	983	1003	UGAAUCUGCUCUGCUUCUUCU	Cleavage
ghy-miR164	c42444.graph_c0	uncharacterized protein	4.5	1156	1176	UGCACAUUACCUGCUUCUUUA	Cleavage
ghy-miR164	c43134.graph_c0	pantothenate kinase 1	4.5	1605	1625	GGCACAUGCCAUGUUUUUUUA	Translation
ghy-miR164	c44464.graph_c0	receptor-like serine/threonine-protein kinase	4.5	1947	1968	CGGACGUGACCCUGUUUCUCCA	Cleavage
ghy-miR164	c46043.graph_c1	uncharacterized protein	4.5	2119	2138	UUGCAGCAUUAUCG-GAUUUU	Cleavage
ghy-miR164	c46648.graph_c1	arabinosyltransferase ARAD1	4.5	1890	1910	CGAACGUGCUGUGCUUUUCUG	Translation
ghy-miR164	c46672.graph_c1	OBERON 3-like protein	4.5	1390	1410	UGCAUGUGUCCUGUUUGUUUG	Cleavage
ghy-miR164	c48111.graph_c0	transcription repressor OFP8-like	4.5	764	784	UCGGCGUGCUCUGUUUCUGCG	Cleavage
ghy-miR164	c48523.graph_c0	1,4-alpha-glucan-branching enzyme	4.5	300	321	UUCACAUGCUCCUGCUUCUCUA	Cleavage
ghy-miR164	c48854.graph_c1	squamosa promoter-binding-like protein 1	4.5	228	248	UGUUGGUGCACUGCUUCUUCA	Cleavage
ghy-miR164	c49424.graph_c0	hypothetical protein	4.5	1210	1230	UGAUUGUGCCUUGCUUCUUCC	Cleavage
ghy-miR164	c49551.graph_c0	RDM16 protein	4.5	43	63	GGUAUGUAUUCUUCUUCUCCA	Cleavage
ghy-miR164	c49673.graph_c0	pentatricopeptide repeat-containing protein	4.5	335	355	UGCGUGUGCCCGCUUUCUCCA	Translation
ghy-miR164	c49979.graph_c1	ATP-dependent RNA helicase-like protein	4.5	2666	2686	UGCUGGUUCUUUGCUUUUCCA	Cleavage
ghy-miR164	c50049.graph_c1	uncharacterized protein	4.5	7730	7750	UUGACGUGUUUUGAUUUUCCA	Cleavage
ghy-miR164	c50296.graph_c1	respiratory burst oxidase homolog protein C-like	4.5	1555	1575	ACCAUGUGUUUUGCUUUUUUU	Cleavage
ghy-miR164	c50298.graph_c0	uncharacterized protein	4.5	965	986	GGCAGGUAGCCCUGCUUCUCUC	Cleavage
ghy-miR164	c51919.graph_c0	hypothetical protein	4.5	130	150	CGCCUGUGACUUGUUUUUCCA	Cleavage
ghy-miR164	c62746.graph_c0	Copia-like retrotransposon	4.5	52	72	GCGUAAUGCCCUGCUUCUCCG	Cleavage
ghy-miR164	c69535.graph_c0	RNA-directed DNA polymerase	4.5	154	174	UGCACUUGCUUUACUUUUUCA	Cleavage
ghy-miR164	c72329.graph_c0	Retrovirus-related Pol polyprotein from transposon RE1	4.5	221	241	UGUCCGCUUCUUGCUUCUCCA	Cleavage
ghy-miR164	c16778.graph_c0	G-type lectin S-receptor-like serine/threonine-protein kinase	5	50	70	AGUAUGUGUCCUGUUUCCUUG	Cleavage
ghy-miR164	c1829.graph_c0	Integrase, catalytic core	5	224	244	UGCAAGAGCCUUGUUUUACCA	Cleavage
ghy-miR164	c22457.graph_c0	serine carboxypeptidase-like 45	5	1643	1663	UGUGCAUGCUUUGUUUUUUUA	Cleavage
ghy-miR164	c24862.graph_c0	uncharacterized protein	5	234	254	UGCGUUUCUUCUGUUUCUUCA	Cleavage
ghy-miR164	c33028.graph_c0	plasma membrane ATPase 1-like	5	304	325	UGCACGUCGUUUUGCUUCUUCU	Cleavage
ghy-miR164	c34311.graph_c0	small and basic intrinsic protein 2,1	5	242	262	UGUAUGAACCCUGCUUCUGUA	Cleavage
ghy-miR164	c34981.graph_c0	unnamed protein product	5	854	872	CGUUUCCUUGGGGUUGUUC	Cleavage
ghy-miR164	c37396.graph_c1	unnamed protein product	5	2637	2657	UGCAUAUUCCCUGCAUUUCCG	Cleavage
ghy-miR164	c38237.graph_c0	40S ribosomal protein S20-2	5	524	544	UGGACGUGAUUUGCUUCACCA	Cleavage
ghy-miR164	c39806.graph_c0	profilin-1	5	603	623	UAUUUUUAUUUUUUUGUGUCA	Cleavage
ghy-miR164	c40486.graph_c0	casein kinase II subunit alpha-like	5	220	240	UGCACGAGUCCUGCUGCUUUC	Cleavage
ghy-miR164	c42639.graph_c0	PAIR1 protein	5	943	963	GGCGUGUGCUUUCCAUCUCCA	Cleavage
ghy-miR164	c44921.graph_c0	uncharacterized protein	5	1912	1932	UGCUCUUGCUCUGUUAUUCCA	Cleavage
ghy-miR164	c46010.graph_c1	zinc finger MYND domain-containing protein 15	5	619	639	UCCGAUUGCUCUGCUUCUUCA	Cleavage
ghy-miR164	c46010.graph_c1	zinc finger MYND domain-containing protein 15	5	619	639	UCCGAUUGCUCUGCUUCUUCA	Cleavage
ghy-miR164	c46405.graph_c2	cytochrome P450 704C1-like	5	699	719	UGCAAGUGCCUUGACUCUCCG	Cleavage
ghy-miR164	c47094.graph_c1	nicastrin	5	3753	3774	UACACGUGCCGCAGCUUCUCUA	Translation
ghy-miR164	c47780.graph_c0	SWEETIE protein	5	1652	1673	UGCACUUGCAUCUGUUUCUCCA	Cleavage
ghy-miR164	c48119.graph_c1	uncharacterized protein	5	428	448	UGGGCAUGUUCUUCUUCUCCA	Cleavage
ghy-miR164	c49197.graph_c1	ras-related protein RABA1e-like	5	656	676	UGCAGGUCCUUUGCCUCUCUA	Cleavage
ghy-miR164	c49896.graph_c0	hypothetical protein	5	4523	4543	UGUAAGGGCCCUGUUCCUUCA	Cleavage
ghy-miR164	c50397.graph_c2	protein kinase-like domain-containing protein	5	3726	3746	UGCACAAGCCUUGUUUAUCUA	Cleavage
ghy-miR164	c50405.graph_c0	TMV resistance protein N-like	5	662	682	UGCACAGGCUUUGUUUCCCCA	Cleavage
ghy-miR164	c51122.graph_c0	uncharacterized protein	5	15	35	UGUGGGUGCUCUUCUUCUCUG	Cleavage
ghy-miR164	c52933.graph_c0	hypothetical protein	5	184	204	UGUGUGUUUCUUGCUUCUCUU	Cleavage
ghy-miR164	c70705.graph_c0	ribonuclease H-like domain-containing protein	5	198	218	UGUCCGUACCCUCCUUUUUCA	Cleavage
ghy-miR166a	c44513.graph_c1	transcription factor bHLH68-like	0	1359	1379	GGGGAAUGAAGCCUGGUCCGA	Cleavage
ghy-miR166a	c46724.graph_c0	hypothetical protein	2.5	837	857	GGGGAGUGGGGUCUGGUUCGA	Cleavage
ghy-miR166a	c51336.graph_c0	uncharacterized protein	3	970	990	CAGGAAAGAAACCUGGUCUGA	Translation
ghy-miR166a	c14385.graph_c0	piezo-type mechanosensitive ion channel homolog	3.5	251	271	UUGCAAUGAAGCCUGGUUUCA	Cleavage
ghy-miR166a	c20543.graph_c0	MARD1-like protein	3.5	1002	1022	UUUUGAAGAAGCCUGGUCCGA	Cleavage
ghy-miR166a	c30468.graph_c0	inositol-tetrakisphosphate 1-kinase 3-like	3.5	12	32	UCUGAAAGAGGCCUGGUUUGA	Cleavage
ghy-miR166a	c31268.graph_c0	hypothetical protein	3.5	72	92	GUCGAAUGGAGCUUGGUUUGG	Cleavage
ghy-miR166a	c39159.graph_c0	E3 ubiquitin-protein ligase	3.5	232	252	CUGGGAUGGAUCUUGGUCUGA	Translation
ghy-miR166a	c42748.graph_c0	organic cation/carnitine transporter 4	3.5	404	424	UCGGAAUGGGGUUUGGUCUGU	Cleavage
ghy-miR166a	c44975.graph_c1	ribosome biogenesis protein NSA2 homolog	3.5	923	943	GUCAAAUGAGGUCUGGUCCGG	Cleavage
ghy-miR166a	c25897.graph_c0	aminopeptidase M1	4	2672	2692	AGGCGGUGAGGUCUGGUUUGA	Cleavage
ghy-miR166a	c29989.graph_c0	amino acid transporter, transmembrane domain-containing protein	4	247	267	UAGGAAUGAUUCCUGGUUUGA	Translation
ghy-miR166a	c30666.graph_c0	unnamed protein product	4	942	962	UCGCGGUGGAGCCUGUUCCGA	Cleavage
ghy-miR166a	c32654.graph_c0	unnamed protein product	4	434	454	UAGAAAUGGAGUCGGGUCCGG	Cleavage
ghy-miR166a	c3975.graph_c0	glucan endo-1,3-beta-glucosidase 11-like	4	189	209	CGAGACUGAAGCCUCGUCUGA	Cleavage
ghy-miR166a	c42832.graph_c1	stress-related protein-like	4	1172	1192	UGGGCUUUAAGCCUGGUUUGA	Cleavage
ghy-miR166a	c45359.graph_c0	WD repeat-containing protein WDS homolog	4	917	937	CAAGAAUGAAGUUUGGUUUGU	Cleavage
ghy-miR166a	c47847.graph_c0	unnamed protein product	4	315	335	AAGCAGUGAAGCUUUGUCCGG	Cleavage
ghy-miR166a	c49587.graph_c0	unnamed protein product	4	1610	1630	UUGGGAUGGGGUCUGGUUCUA	Cleavage
ghy-miR166a	c50080.graph_c1	G-type lectin S-receptor-like serine/threonine-protein kinase	4	597	617	CCGGAAUGAAGUUUGGCCGGA	Cleavage
ghy-miR166a	c59980.graph_c0	hypothetical protein	4	11	31	UCCGAAUGAAGUUUGGUCUUA	Cleavage
ghy-miR166a	c69459.graph_c0	MACPF domain-containing protein NSL1-like	4	275	295	UCGGAAUGAAACCUGGUGCGU	Translation
ghy-miR166a	c39427.graph_c0	uncharacterized protein	4.5	1253	1273	UGGGAGAGAAGUUUGGUAUGA	Cleavage
ghy-miR166a	c40857.graph_c0	hypothetical protein	4.5	771	791	GUGGCAUGAAUCCUGCUCCGG	Translation
ghy-miR166a	c41733.graph_c0	uncharacterized protein	4.5	1675	1695	CGGGUAUGGAGCGUGGUUCGU	Cleavage
ghy-miR166a	c41931.graph_c0	hypothetical protein	4.5	656	676	ACGGGAUGAAGAUUGGUUUGU	Translation
ghy-miR166a	c42586.graph_c0	inactive receptor kinase	4.5	525	545	ACCCAAUGAGGCUUGGUUUGG	Cleavage
ghy-miR166a	c44036.graph_c0	hypothetical protein	4.5	656	676	CUGGAGUGGAGCUUUGGCCGA	Cleavage
ghy-miR166a	c44585.graph_c0	Chaperonin Cpn60	4.5	1537	1557	CGGCAAUGAGGCCUUGUGCGA	Cleavage
ghy-miR166a	c44847.graph_c0	unnamed protein product	4.5	970	990	UUUGAAUCAAGUCAGGUUCGA	Cleavage
ghy-miR166a	c45506.graph_c0	uncharacterized protein	4.5	811	831	CGGGAGUGAAGUUGGGUCUGC	Cleavage
ghy-miR166a	c46605.graph_c0	RNA-directed DNA polymerase	4.5	4865	4885	CGAAGAUGGAGUCUGGUUUGA	Cleavage
ghy-miR166a	c46903.graph_c3	3-hexulose-6-phosphate isomerase	4.5	1005	1025	GAGGAGUGGAUCCUGGUGUGA	Translation
ghy-miR166a	c48191.graph_c2	inactive glucose-1-phosphate adenylyltransferase small subunit 2	4.5	1572	1592	GAUGAAUGAAACCUGGUUUGC	Translation
ghy-miR166a	c48746.graph_c2	hypothetical protein	4.5	682	702	GGGAGUUGAAGGCUGGUCUGA	Translation
ghy-miR166a	c48924.graph_c0	187-kDa microtubule-associated protein AIR9	4.5	6067	6087	AGGUUGUGAAGCCUGGUUCCA	Cleavage
ghy-miR166a	c49258.graph_c0	glutamate receptor 3.6-like	4.5	458	478	UGGGAAUUGAGCCUGAUUUGG	Cleavage
ghy-miR166a	c49349.graph_c3	beta-1,3-galactosyltransferase 2	4.5	2106	2126	GAUGUAUGAAAUCUGGUCCGG	Translation
ghy-miR166a	c49489.graph_c1	RNA-directed DNA polymerase	4.5	664	684	UGGCAAUGACCCCUGGUCUGA	Translation
ghy-miR166a	c49999.graph_c1	formin-like protein 1	4.5	1995	2015	CACCGAUCAAGCUUGGUCCGG	Cleavage
ghy-miR166a	c50382.graph_c0	uncharacterized protein	4.5	386	406	UAGGAAUGGAGUUUGGUACUA	Cleavage
ghy-miR166a	c56006.graph_c0	Retrovirus-related Pol polyprotein from transposon TNT 1-94	4.5	161	181	CCCGAUUGAAGUUUGGUCCAA	Cleavage
ghy-miR166a	c56228.graph_c0	hypothetical protein	4.5	525	545	UGGGACUGAAUUUUGGUCCGU	Translation
ghy-miR166a	c92586.graph_c0	hypothetical protein	4.5	17	37	UCAGAAUGAAACUUGGUCCUA	Translation
ghy-miR166a	c11651.graph_c0	uncharacterized protein	5	464	484	UUUGGAUGAAGCCUGGAUCCA	Cleavage
ghy-miR166a	c16817.graph_c0	Ty3/gypsy retrotransposon protein	5	251	271	GGGGGAUCAAGGCUGGUUAGA	Translation
ghy-miR166a	c17929.graph_c0	chaperonin CPN60-2	5	171	190	AGGGAAUGAAGU-UGGACCGA	Cleavage
ghy-miR166a	c26041.graph_c0	serine/threonine protein kinase IREH1	5	6	26	AUCGAAUGUAGUCUGGUUCAA	Cleavage
ghy-miR166a	c30519.graph_c0	uncharacterized protein	5	875	895	GGAGGAGGAAGACUGGUUUGA	Translation
ghy-miR166a	c38738.graph_c0	E2F-associated phosphoprotein	5	453	473	CAACUAUGAAGUUUGGUUUGA	Cleavage
ghy-miR166a	c39231.graph_c0	carotenoid 9,10(9',10')-cleavage dioxygenase 1-like	5	1257	1277	CCUGAAUGGAGCUUGGUCUCG	Cleavage
ghy-miR166a	c39787.graph_c0	root phototropism protein 3-like	5	1277	1297	AGCCGAUGAGGUCUGGUCGGA	Cleavage
ghy-miR166a	c40716.graph_c0	peptidyl-prolyl cis-trans isomerase FKBP20-2	5	755	775	UGGGAAUCAAGCCUGAUGCGC	Cleavage
ghy-miR166a	c41586.graph_c0	phosphoglycerate kinase	5	643	663	AUUUGAUGGAAUCUGGUCCGA	Translation
ghy-miR166a	c41705.graph_c1	hypothetical protein	5	76	96	UGGGAUGGAGGCUUGGUUUGU	Cleavage
ghy-miR166a	c41724.graph_c0	cell division cycle-associated protein 7-like	5	951	971	UUCGAAUGAGGCCGAGUCUGA	Cleavage
ghy-miR166a	c41836.graph_c0	P-loop containing nucleoside triphosphate hydrolases superfamily protein	5	1429	1449	UGGGAAUGGAUUUUGGAUCGA	Translation
ghy-miR166a	c42270.graph_c0	GATA transcription factor 1-like	5	1700	1720	CAAACAUGAAGCUUGGUCCAA	Cleavage
ghy-miR166a	c44607.graph_c0	unnamed protein product	5	2013	2033	UGAGAGUGAAUUUUGGUUUGA	Translation
ghy-miR166a	c45788.graph_c0	ABC transporter ABCE	5	610	630	CUCGAGUGGCGCCUCGUCCGA	Cleavage
ghy-miR166a	c45868.graph_c1	Dehydrogenase, E1 component	5	737	757	CUCAGUACAGGGAGCCAGGAG	Cleavage
ghy-miR166a	c46387.graph_c2	tubulin-folding cofactor D	5	3513	3533	AGGGAAGGAAUCGUGGUUUGA	Translation
ghy-miR166a	c46506.graph_c0	pentatricopeptide repeat-containing protein	5	659	679	CGGGUGUGGAGUUUGAUUCGA	Cleavage
ghy-miR166a	c47012.graph_c1	myosin-2 heavy chain	5	3026	3046	GGUGAUUGAAGCUUGAUUCGG	Cleavage
ghy-miR166a	c47804.graph_c0	clathrin interactor EPSIN 2-like	5	1224	1244	GGGGAAUGUGGUCUGGUUGGG	Cleavage
ghy-miR166a	c47944.graph_c0	ABC transporter B family member 8	5	2069	2089	CGACGGUGGAGCUUGGUUUGA	Cleavage
ghy-miR166a	c48447.graph_c0	protein phosphatase 2C 70	5	1669	1689	UCCAAAUGAAGACUGGUCUGU	Translation
ghy-miR166a	c48658.graph_c0	Retrovirus-related Pol polyprotein from transposon TNT 1-94	5	849	869	GGGUGAUGAACCCUUGUCUGA	Translation
ghy-miR166a	c48794.graph_c2	hypothetical protein	5	2210	2230	GGGGAAGCUAGUUUGGUUCGA	Cleavage
ghy-miR166a	c49458.graph_c1	trichome birefringence-like	5	3755	3775	CCCAAAUGCGGUCUGGUUCGA	Cleavage
ghy-miR166a	c49741.graph_c0	uncharacterized protein	5	1593	1613	ACAGGAUGAAGCUUGCUACGA	Cleavage
ghy-miR166a	c49823.graph_c0	Ty3/gypsy retrotransposon protein	5	2627	2647	AGGGAUUGAAGCCGGAUUUGA	Cleavage
ghy-miR166a	c49865.graph_c0	photosystem I P700 apoprotein A1	5	890	909	AGGGAAUGAGGU-UGGUCCGC	Cleavage
ghy-miR166a	c49962.graph_c1	hypothetical protein	5	1469	1489	AGGAAAUGACACUUGGUUCGA	Translation
ghy-miR166a	c50356.graph_c0	homeobox-DDT domain protein RLT1-like	5	489	509	GUUCAAUGGAGACUGGUUCGG	Translation
ghy-miR166a	c50508.graph_c0	hypothetical protein	5	847	867	CGGGAAUGAAUCUUGGUUGGC	Translation
ghy-miR166a	c55570.graph_c0	hypothetical protein	5	44	64	CGGGAAUGAAGUUUAUUUCGG	Cleavage
ghy-miR166a	c58386.graph_c0	Leucine-rich repeat-containing N-terminal, type 2	5	244	264	AGGGGGGGAAGCCUGAUUUGG	Cleavage
ghy-miR166a	c83640.graph_c0	ribonuclease H-like domain-containing protein	5	92	112	CGGGAGUGAGGCUAGGUUUGC	Cleavage
ghy-miR166b	c44513.graph_c1	transcription factor bHLH68-like	0	1359	1379	GGGGAAUGAAGCCUGGUCCGA	Cleavage
ghy-miR166b	c46724.graph_c0	hypothetical protein	2.5	837	857	GGGGAGUGGGGUCUGGUUCGA	Cleavage
ghy-miR166b	c51336.graph_c0	uncharacterized protein	3	970	990	CAGGAAAGAAACCUGGUCUGA	Translation
ghy-miR166b	c14385.graph_c0	piezo-type mechanosensitive ion channel homolog	3.5	251	271	UUGCAAUGAAGCCUGGUUUCA	Cleavage
ghy-miR166b	c20543.graph_c0	MARD1-like protein	3.5	1002	1022	UUUUGAAGAAGCCUGGUCCGA	Cleavage
ghy-miR166b	c30468.graph_c0	inositol-tetrakisphosphate 1-kinase 3-like	3.5	12	32	UCUGAAAGAGGCCUGGUUUGA	Cleavage
ghy-miR166b	c31268.graph_c0	hypothetical protein	3.5	72	92	GUCGAAUGGAGCUUGGUUUGG	Cleavage
ghy-miR166b	c39159.graph_c0	E3 ubiquitin-protein ligase	3.5	232	252	CUGGGAUGGAUCUUGGUCUGA	Translation
ghy-miR166b	c42748.graph_c0	organic cation/carnitine transporter 4	3.5	404	424	UCGGAAUGGGGUUUGGUCUGU	Cleavage
ghy-miR166b	c44975.graph_c1	ribosome biogenesis protein NSA2 homolog	3.5	923	943	GUCAAAUGAGGUCUGGUCCGG	Cleavage
ghy-miR166b	c25897.graph_c0	aminopeptidase M5	4	2672	2692	AGGCGGUGAGGUCUGGUUUGA	Cleavage
ghy-miR166b	c29989.graph_c0	amino acid transporter, transmembrane domain-containing protein	4	247	267	UAGGAAUGAUUCCUGGUUUGA	Translation
ghy-miR166b	c30666.graph_c0	unnamed protein product	4	942	962	UCGCGGUGGAGCCUGUUCCGA	Cleavage
ghy-miR166b	c32654.graph_c0	unnamed protein product	4	434	454	UAGAAAUGGAGUCGGGUCCGG	Cleavage
ghy-miR166b	c3975.graph_c0	glucan endo-1,3-beta-glucosidase 11-like	4	189	209	CGAGACUGAAGCCUCGUCUGA	Cleavage
ghy-miR166b	c42832.graph_c1	stress-related protein-like	4	1172	1192	UGGGCUUUAAGCCUGGUUUGA	Cleavage
ghy-miR166b	c45359.graph_c0	WD repeat-containing protein WDS homolog	4	917	937	CAAGAAUGAAGUUUGGUUUGU	Cleavage
ghy-miR166b	c47847.graph_c0	unnamed protein product	4	315	335	AAGCAGUGAAGCUUUGUCCGG	Cleavage
ghy-miR166b	c49587.graph_c0	unnamed protein product	4	1610	1630	UUGGGAUGGGGUCUGGUUCUA	Cleavage
ghy-miR166b	c50080.graph_c1	G-type lectin S-receptor-like serine/threonine-protein kinase	4	597	617	CCGGAAUGAAGUUUGGCCGGA	Cleavage
ghy-miR166b	c59980.graph_c0	hypothetical protein	4	11	31	UCCGAAUGAAGUUUGGUCUUA	Cleavage
ghy-miR166b	c69459.graph_c0	MACPF domain-containing protein NSL1-like	4	275	295	UCGGAAUGAAACCUGGUGCGU	Translation
ghy-miR166b	c39427.graph_c0	uncharacterized protein	4.5	1253	1273	UGGGAGAGAAGUUUGGUAUGA	Cleavage
ghy-miR166b	c40857.graph_c0	hypothetical protein	4.5	771	791	GUGGCAUGAAUCCUGCUCCGG	Translation
ghy-miR166b	c41733.graph_c0	uncharacterized protein	4.5	1675	1695	CGGGUAUGGAGCGUGGUUCGU	Cleavage
ghy-miR166b	c41931.graph_c0	hypothetical protein	4.5	656	676	ACGGGAUGAAGAUUGGUUUGU	Translation
ghy-miR166b	c42586.graph_c0	inactive receptor kinase	4.5	525	545	ACCCAAUGAGGCUUGGUUUGG	Cleavage
ghy-miR166b	c44036.graph_c0	hypothetical protein	4.5	656	676	CUGGAGUGGAGCUUUGGCCGA	Cleavage
ghy-miR166b	c44585.graph_c0	Chaperonin Cpn60	4.5	1537	1557	CGGCAAUGAGGCCUUGUGCGA	Cleavage
ghy-miR166b	c44847.graph_c0	unnamed protein product	4.5	970	990	UUUGAAUCAAGUCAGGUUCGA	Cleavage
ghy-miR166b	c45506.graph_c0	uncharacterized protein	4.5	811	831	CGGGAGUGAAGUUGGGUCUGC	Cleavage
ghy-miR166b	c46605.graph_c0	RNA-directed DNA polymerase	4.5	4865	4885	CGAAGAUGGAGUCUGGUUUGA	Cleavage
ghy-miR166b	c46903.graph_c3	3-hexulose-8-phosphate isomerase	4.5	1005	1025	GAGGAGUGGAUCCUGGUGUGA	Translation
ghy-miR166b	c48191.graph_c2	inactive glucose-1-phosphate adenylyltransferase small subunit 2	4.5	1572	1592	GAUGAAUGAAACCUGGUUUGC	Translation
ghy-miR166b	c48746.graph_c2	hypothetical protein	4.5	682	702	GGGAGUUGAAGGCUGGUCUGA	Translation
ghy-miR166b	c48924.graph_c0	187-kDa microtubule-associated protein AIR9	4.5	6067	6087	AGGUUGUGAAGCCUGGUUCCA	Cleavage
ghy-miR166b	c49258.graph_c0	glutamate receptor 3.6-like	4.5	458	478	UGGGAAUUGAGCCUGAUUUGG	Cleavage
ghy-miR166b	c49349.graph_c3	beta-1,3-galactosyltransferase 2	4.5	2106	2126	GAUGUAUGAAAUCUGGUCCGG	Translation
ghy-miR166b	c49489.graph_c1	RNA-directed DNA polymerase	4.5	664	684	UGGCAAUGACCCCUGGUCUGA	Translation
ghy-miR166b	c49999.graph_c1	formin-like protein 1	4.5	1995	2015	CACCGAUCAAGCUUGGUCCGG	Cleavage
ghy-miR166b	c50382.graph_c0	uncharacterized protein	4.5	386	406	UAGGAAUGGAGUUUGGUACUA	Cleavage
ghy-miR166b	c56006.graph_c0	Retrovirus-related Pol polyprotein from transposon TNT 1-94	4.5	161	181	CCCGAUUGAAGUUUGGUCCAA	Cleavage
ghy-miR166b	c56228.graph_c0	hypothetical protein	4.5	525	545	UGGGACUGAAUUUUGGUCCGU	Translation
ghy-miR166b	c92586.graph_c0	hypothetical protein	4.5	17	37	UCAGAAUGAAACUUGGUCCUA	Translation
ghy-miR166b	c11651.graph_c0	uncharacterized protein	5	464	484	UUUGGAUGAAGCCUGGAUCCA	Cleavage
ghy-miR166b	c16817.graph_c0	Ty3/gypsy retrotransposon protein	5	251	271	GGGGGAUCAAGGCUGGUUAGA	Translation
ghy-miR166b	c17929.graph_c0	chaperonin CPN60-2	5	171	190	AGGGAAUGAAGU-UGGACCGA	Cleavage
ghy-miR166b	c26041.graph_c0	serine/threonine protein kinase IREH1	5	6	26	AUCGAAUGUAGUCUGGUUCAA	Cleavage
ghy-miR166b	c30519.graph_c0	uncharacterized protein	5	875	895	GGAGGAGGAAGACUGGUUUGA	Translation
ghy-miR166b	c38738.graph_c0	E2F-associated phosphoprotein	5	453	473	CAACUAUGAAGUUUGGUUUGA	Cleavage
ghy-miR166b	c39231.graph_c0	carotenoid 9,10(9',10')-cleavage dioxygenase 1-like	5	1257	1277	CCUGAAUGGAGCUUGGUCUCG	Cleavage
ghy-miR166b	c39787.graph_c0	root phototropism protein 3-like	5	1277	1297	AGCCGAUGAGGUCUGGUCGGA	Cleavage
ghy-miR166b	c40716.graph_c0	peptidyl-prolyl cis-trans isomerase FKBP20-2,	5	755	775	UGGGAAUCAAGCCUGAUGCGC	Cleavage
ghy-miR166b	c41586.graph_c0	phosphoglycerate kinase	5	643	663	AUUUGAUGGAAUCUGGUCCGA	Translation
ghy-miR166b	c41705.graph_c1	hypothetical protein	5	76	96	UGGGAUGGAGGCUUGGUUUGU	Cleavage
ghy-miR166b	c41724.graph_c0	cell division cycle-associated protein 7-like	5	951	971	UUCGAAUGAGGCCGAGUCUGA	Cleavage
ghy-miR166b	c41836.graph_c0	P-loop containing nucleoside triphosphate hydrolases superfamily protein	5	1429	1449	UGGGAAUGGAUUUUGGAUCGA	Translation
ghy-miR166b	c42270.graph_c0	GATA transcription factor 1-like	5	1700	1720	CAAACAUGAAGCUUGGUCCAA	Cleavage
ghy-miR166b	c44607.graph_c0	unnamed protein product	5	2013	2033	UGAGAGUGAAUUUUGGUUUGA	Translation
ghy-miR166b	c45788.graph_c0	ABC transporter ABCE	5	610	630	CUCGAGUGGCGCCUCGUCCGA	Cleavage
ghy-miR166b	c45868.graph_c1	Dehydrogenase, E1 component	5	737	757	CUCAGUACAGGGAGCCAGGAG	Cleavage
ghy-miR166b	c46387.graph_c2	tubulin-folding cofactor D	5	3513	3533	AGGGAAGGAAUCGUGGUUUGA	Translation
ghy-miR166b	c46506.graph_c0	pentatricopeptide repeat-containing protein	5	659	679	CGGGUGUGGAGUUUGAUUCGA	Cleavage
ghy-miR166b	c47012.graph_c1	myosin-2 heavy chain	5	3026	3046	GGUGAUUGAAGCUUGAUUCGG	Cleavage
ghy-miR166b	c47804.graph_c0	clathrin interactor EPSIN 2-like	5	1224	1244	GGGGAAUGUGGUCUGGUUGGG	Cleavage
ghy-miR166b	c47944.graph_c0	ABC transporter B family member 8	5	2069	2089	CGACGGUGGAGCUUGGUUUGA	Cleavage
ghy-miR166b	c47989.graph_c2	intermediate cleaving peptidase 55	5	980	1000	UUGGAAUGCAGCAUGGUUUGU	Cleavage
ghy-miR166b	c48447.graph_c0	protein phosphatase 2C 70	5	1669	1689	UCCAAAUGAAGACUGGUCUGU	Translation
ghy-miR166b	c48658.graph_c0	Retrovirus-related Pol polyprotein from transposon TNT 1-94	5	849	869	GGGUGAUGAACCCUUGUCUGA	Translation
ghy-miR166b	c48794.graph_c2	hypothetical protein	5	2210	2230	GGGGAAGCUAGUUUGGUUCGA	Cleavage
ghy-miR166b	c49458.graph_c1	trichome birefringence-like	5	3755	3775	CCCAAAUGCGGUCUGGUUCGA	Cleavage
ghy-miR166b	c49741.graph_c0	uncharacterized protein	5	1593	1613	ACAGGAUGAAGCUUGCUACGA	Cleavage
ghy-miR166b	c49823.graph_c0	Ty3/gypsy retrotransposon protein	5	2627	2647	AGGGAUUGAAGCCGGAUUUGA	Cleavage
ghy-miR166b	c49865.graph_c0	photosystem I P700 apoprotein A1	5	890	909	AGGGAAUGAGGU-UGGUCCGC	Cleavage
ghy-miR166b	c49962.graph_c1	hypothetical protein	5	1469	1489	AGGAAAUGACACUUGGUUCGA	Translation
ghy-miR166b	c50356.graph_c0	homeobox-DDT domain protein RLT1-like	5	489	509	GUUCAAUGGAGACUGGUUCGG	Translation
ghy-miR166b	c50508.graph_c0	hypothetical protein	5	847	867	CGGGAAUGAAUCUUGGUUGGC	Translation
ghy-miR166b	c55570.graph_c0	hypothetical protein	5	44	64	CGGGAAUGAAGUUUAUUUCGG	Cleavage
ghy-miR166b	c58386.graph_c0	Leucine-rich repeat-containing N-terminal, type 2	5	244	264	AGGGGGGGAAGCCUGAUUUGG	Cleavage
ghy-miR166b	c83640.graph_c0	ribonuclease H-like domain-containing protein	5	92	112	CGGGAGUGAGGCUAGGUUUGC	Cleavage
ghy-miR166c	c44513.graph_c1	transcription factor bHLH68-like	0	1359	1379	GGGGAAUGAAGCCUGGUCCGA	Cleavage
ghy-miR166c	c46724.graph_c0	hypothetical protein	2.5	837	857	GGGGAGUGGGGUCUGGUUCGA	Cleavage
ghy-miR166c	c49682.graph_c0	uncharacterized protein	2.5	916	936	UAAAUAACGCUUGGUCCGAGA	Cleavage
ghy-miR166c	c10717.graph_c0	hypothetical protein	3.5	663	683	UAUAUGAUGCCUUGUCCGAGA	Cleavage
ghy-miR166c	c14385.graph_c0	piezo-type mechanosensitive ion channel homolog	3.5	251	271	UUGCAAUGAAGCCUGGUUUCA	Cleavage
ghy-miR166c	c20543.graph_c0	MARD1-like protein	3.5	1002	1022	UUUUGAAGAAGCCUGGUCCGA	Cleavage
ghy-miR166c	c24867.graph_c0	protein of unknown function	3.5	254	274	UUGAUGGAGCUUGCUCUGAGA	Cleavage
ghy-miR166c	c30468.graph_c0	inositol-tetrakisphosphate 1-kinase 3-like	3.5	12	32	UCUGAAAGAGGCCUGGUUUGA	Cleavage
ghy-miR166c	c31268.graph_c0	hypothetical protein	3.5	72	92	GUCGAAUGGAGCUUGGUUUGG	Cleavage
ghy-miR166c	c42748.graph_c0	organic cation/carnitine transporter 4	3.5	404	424	UCGGAAUGGGGUUUGGUCUGU	Cleavage
ghy-miR166c	c44975.graph_c1	ribosome biogenesis protein NSA2 homolog	3.5	923	943	GUCAAAUGAGGUCUGGUCCGG	Cleavage
ghy-miR166c	c48299.graph_c0	HIRA-like protein	3.5	655	675	GAAAGGAAGCCUGGUUCAGGA	Cleavage
ghy-miR166c	c50208.graph_c0	RNA-directed DNA polymerase	3.5	451	471	ACAAUCAUGUUUGGUCUGAGA	Cleavage
ghy-miR166c	c11613.graph_c0	inositol-tetrakisphosphate 1-kinase 1-like	4	1022	1045	CAUCGAUCUUUGGCAUGGUUGAUU	Cleavage
ghy-miR166c	c19299.graph_c0	uncharacterized protein	4	419	439	GGUCUUGGGCCUGGUCCGAGA	Cleavage
ghy-miR166c	c25897.graph_c0	aminopeptidase M3	4	2672	2692	AGGCGGUGAGGUCUGGUUUGA	Cleavage
ghy-miR166c	c30666.graph_c0	unnamed protein product	4	942	962	UCGCGGUGGAGCCUGUUCCGA	Cleavage
ghy-miR166c	c32654.graph_c0	unnamed protein product	4	434	454	UAGAAAUGGAGUCGGGUCCGG	Cleavage
ghy-miR166c	c39707.graph_c0	homeobox-leucine zipper protein ATHB-15-like	4	2589	2609	CGAAUGGAGCUUGGUUUCGGA	Cleavage
ghy-miR166c	c3975.graph_c0	glucan endo-1,3-beta-glucosidase 11-like	4	189	209	CGAGACUGAAGCCUCGUCUGA	Cleavage
ghy-miR166c	c40376.graph_c0	endoplasmic reticulum metallopeptidase 1-like	4	1673	1696	AUUUGCUGCAUUAUGCGACUUUAU	Cleavage
ghy-miR166c	c41953.graph_c0	Spc97/Spc98	4	2697	2717	CAUAAGAAGACUGGUCUGAGA	Cleavage
ghy-miR166c	c44564.graph_c0	unnamed protein product	4	142	162	AGCAAAGUACGAUGAUUUAGA	Cleavage
ghy-miR166c	c46402.graph_c0	E3 ubiquitin-protein ligase	4	158	178	GGUAUAGAGCCUGAUCCGAGA	Cleavage
ghy-miR166c	c48915.graph_c0	Retrovirus-related Pol polyprotein from transposon TNT 1-94	4	2182	2202	CCUACGAAGCUUGGUCAGAGA	Cleavage
ghy-miR166c	c49064.graph_c0	hypothetical protein	4	1921	1941	GAAGUGAGGCCUGAACCGAGA	Cleavage
ghy-miR166c	c59980.graph_c0	hypothetical protein	4	11	31	UCCGAAUGAAGUUUGGUCUUA	Cleavage
ghy-miR166c	c76011.graph_c0	uncharacterized protein	4	126	146	AUAAUGAGGUUGGGUUUGAGA	Translation
ghy-miR166c	c12587.graph_c0	zinc finger MYM-type protein 1-like	4.5	122	142	UUUAAGAAGCCUGGUUUAAGA	Cleavage
ghy-miR166c	c12643.graph_c0	fatty acid hydroperoxide lyase	4.5	272	295	GCUUGUCCGACGCAGUUGGCGUCC	Cleavage
ghy-miR166c	c30650.graph_c0	cyclin-T1-3-like	4.5	1517	1537	ACGGUGAAGCCUGGAUAGAGA	Cleavage
ghy-miR166c	c30678.graph_c0	receptor-like protein kinase HSL1	4.5	1880	1900	UCAGUGAAACCAGGUUCGGGA	Translation
ghy-miR166c	c33206.graph_c0	uncharacterized protein	4.5	106	126	AAAAUGAGGUCUAGUCAGAGG	Cleavage
ghy-miR166c	c33404.graph_c0	inactive leucine-rich repeat receptor-like protein kinase	4.5	2352	2372	CUAAUGGAGCUUUGUGUGAGA	Cleavage
ghy-miR166c	c35305.graph_c0	transcription factor MYB3R-4	4.5	796	816	AAGAAGAGACGCCUGGUCUGA	Cleavage
ghy-miR166c	c38112.graph_c0	uncharacterized protein	4.5	1	20	UGCUGAAGCUUGGUUCAAGA	Cleavage
ghy-miR166c	c39427.graph_c0	uncharacterized protein	4.5	1253	1273	UGGGAGAGAAGUUUGGUAUGA	Cleavage
ghy-miR166c	c39966.graph_c0	hypothetical protein	4.5	195	215	UCAGUGAGGUCCGGUCUGAGC	Translation
ghy-miR166c	c40310.graph_c0	eukaryotic translation initiation factor 4G	4.5	632	652	AGAGAAGAGUUUGGUUCGAGA	Cleavage
ghy-miR166c	c42586.graph_c0	inactive receptor kinase	4.5	525	545	ACCCAAUGAGGCUUGGUUUGG	Cleavage
ghy-miR166c	c43433.graph_c0	uncharacterized protein	4.5	2676	2696	UGGGUCGAGUCUGGACCGAGA	Cleavage
ghy-miR166c	c44036.graph_c0	hypothetical protein	4.5	656	676	CUGGAGUGGAGCUUUGGCCGA	Cleavage
ghy-miR166c	c44043.graph_c0	hypothetical protein	4.5	196	216	AGUAUAAUGUCUGGUUCGGGA	Cleavage
ghy-miR166c	c44157.graph_c0	meiosis-specific protein ASY3	4.5	276	299	AGAUUUGUCUGAAUCGAGCUGAAG	Cleavage
ghy-miR166c	c44585.graph_c0	Chaperonin Cpn60	4.5	1537	1557	CGGCAAUGAGGCCUUGUGCGA	Cleavage
ghy-miR166c	c44923.graph_c0	UVR domain-containing protein	4.5	1818	1838	AUAAUGAAGCUUUGUCUAGGA	Cleavage
ghy-miR166c	c45052.graph_c0	Concanavalin A-like lectin/glucanase	4.5	1833	1853	CUGUUGAACCCUGGUUUGAGA	Cleavage
ghy-miR166c	c45178.graph_c0	RNA-directed DNA polymerase	4.5	2605	2625	AGGAUGGAGGCUGGAUCGAGA	Cleavage
ghy-miR166c	c46605.graph_c0	RNA-directed DNA polymerase	4.5	4865	4885	CGAAGAUGGAGUCUGGUUUGA	Cleavage
ghy-miR166c	c48746.graph_c2	hypothetical protein	4.5	682	702	GGGAGUUGAAGGCUGGUCUGA	Translation
ghy-miR166c	c48767.graph_c0	hypothetical protein	4.5	1868	1888	AAGAUGAAGCUAGGUUUGGGG	Translation
ghy-miR166c	c49499.graph_c0	Retrovirus-related Pol polyprotein from transposon TNT 1-94	4.5	72	92	CUCCUGGAGCAUGGUUCGAGA	Translation
ghy-miR166c	c49820.graph_c1	CD2 antigen cytoplasmic tail-binding protein 2-like	4.5	1493	1513	AAAAUAAGGCCUGGGUCGAGC	Cleavage
ghy-miR166c	c50382.graph_c0	uncharacterized protein	4.5	386	406	UAGGAAUGGAGUUUGGUACUA	Cleavage
ghy-miR166c	c50406.graph_c0	Retrovirus-related Pol polyprotein from transposon TNT 1-94	4.5	1307	1327	AAGCUGUGAACCUUGGUCCGA	Translation
ghy-miR166c	c56006.graph_c0	Retrovirus-related Pol polyprotein from transposon TNT 1-94	4.5	161	181	CCCGAUUGAAGUUUGGUCCAA	Cleavage
ghy-miR166c	c19130.graph_c0	transducin beta-like protein 2	5	1199	1219	AUGAAGCACCAGUAAGAUUUU	Translation
ghy-miR166c	c23244.graph_c0	serine/threonine-protein kinase STY13-like	5	274	294	AGAGAGAAGCCCGGUUCGUGA	Translation
ghy-miR166c	c24686.graph_c0	zein-binding domain-containing protein	5	190	210	AAGGAAAGAAACCUGAUUUGA	Translation
ghy-miR166c	c31496.graph_c0	uncharacterized protein	5	956	976	AUGUAGCGUUGUCGGGCUUUU	Cleavage
ghy-miR166c	c31649.graph_c0	FAD synthase	5	82	102	AGAGUGAAGCUUGGAUAGAGG	Cleavage
ghy-miR166c	c34981.graph_c0	unnamed protein product	5	854	872	CGUUUCCUUGGGGUUGUUC	Cleavage
ghy-miR166c	c40027.graph_c0	homeobox-leucine zipper protein HOX11-like	5	44	64	AAAAUGGAGUUGGGUUUGAGU	Translation
ghy-miR166c	c40137.graph_c0	pentatricopeptide repeat-containing protein	5	1236	1259	UGUGUUGGUUACAGCAGGGAAGAG	Cleavage
ghy-miR166c	c40763.graph_c1	dihydrolipoyl dehydrogenase	5	176	196	AGGACGACGUCUGCUUCGAGA	Cleavage
ghy-miR166c	c41586.graph_c0	phosphoglycerate kinase	5	643	663	AUUUGAUGGAAUCUGGUCCGA	Translation
ghy-miR166c	c42270.graph_c0	GATA transcription factor 1-like	5	1700	1720	CAAACAUGAAGCUUGGUCCAA	Cleavage
ghy-miR166c	c43187.graph_c0	IQ-DOMAIN 1-like	5	783	803	GGGCUCGGGCCUGGUCCGGGU	Cleavage
ghy-miR166c	c43520.graph_c0	GFS12 protein	5	4916	4935	GGAGUGAGGCCUG-UUUGAGA	Cleavage
ghy-miR166c	c44522.graph_c2	E3 ubiquitin-protein ligase RKP	5	5234	5254	UCUAGCAGGCCUGGUUCGAGA	Cleavage
ghy-miR166c	c44627.graph_c0	type IV inositol polyphosphate 5-phosphatase 3	5	60	83	AAUAUUUAUUGAUCUAUAUCAAUA	Cleavage
ghy-miR166c	c45868.graph_c1	Dehydrogenase, E1 component	5	737	757	CUCAGUACAGGGAGCCAGGAG	Cleavage
ghy-miR166c	c46690.graph_c0	serine/threonine-protein kinase svkA-like	5	2034	2054	AGAGAUAAGUCUGGUUUGAGC	Cleavage
ghy-miR166c	c47012.graph_c1	myosin-2 heavy chain	5	3026	3046	GGUGAUUGAAGCUUGAUUCGG	Cleavage
ghy-miR166c	c47185.graph_c0	TONSOKU protein	5	1688	1708	UUAAUGAAGUCUGAUAUGAGC	Cleavage
ghy-miR166c	c47595.graph_c1	protein DETOXIFICATION 33	5	1837	1857	AAGUUGAGGUUUGGUCCGGGC	Cleavage
ghy-miR166c	c47982.graph_c0	triacylglycerol lipase 2	5	381	401	AGAAUCAAGUCUGUUUCGUGA	Cleavage
ghy-miR166c	c48447.graph_c0	protein phosphatase 2C 70	5	1669	1689	UCCAAAUGAAGACUGGUCUGU	Translation
ghy-miR166c	c48997.graph_c0	Histone acetylation protein 2	5	2631	2652	UGAAUGAAGGUUUGGUCUGAGG	Cleavage
ghy-miR166c	c49823.graph_c0	Ty3/gypsy retrotransposon protein	5	2627	2647	AGGGAUUGAAGCCGGAUUUGA	Cleavage
ghy-miR166c	c50271.graph_c2	hypothetical protein	5	1117	1137	GGAGUGCGGUUUGGUUCAAGA	Cleavage
ghy-miR166c	c50356.graph_c0	homeobox-DDT domain protein RLT1-like	5	489	509	GUUCAAUGGAGACUGGUUCGG	Translation
ghy-miR166c	c73028.graph_c0	lactosylceramide 4-alpha-galactosyltransferase-like	5	345	365	AUUUUGAAGUCUGGUUUUAGA	Cleavage
ghy-miR166d	c44513.graph_c1	transcription factor bHLH68-like	0	1359	1379	GGGGAAUGAAGCCUGGUCCGA	Cleavage
ghy-miR166d	c46724.graph_c0	hypothetical protein	2.5	837	857	GGGGAGUGGGGUCUGGUUCGA	Cleavage
ghy-miR166d	c36149.graph_c0	uncharacterized protein	3	2652	2675	GUCCAUGGCUUUUUCGACAAUCGC	Cleavage
ghy-miR166d	c51336.graph_c0	uncharacterized protein	3	970	990	CAGGAAAGAAACCUGGUCUGA	Translation
ghy-miR166d	c14385.graph_c0	piezo-type mechanosensitive ion channel homolog	3.5	251	271	UUGCAAUGAAGCCUGGUUUCA	Cleavage
ghy-miR166d	c20543.graph_c0	MARD1-like protein	3.5	1002	1022	UUUUGAAGAAGCCUGGUCCGA	Cleavage
ghy-miR166d	c30468.graph_c0	inositol-tetrakisphosphate 1-kinase 3-like	3.5	12	32	UCUGAAAGAGGCCUGGUUUGA	Cleavage
ghy-miR166d	c31268.graph_c0	hypothetical protein	3.5	72	92	GUCGAAUGGAGCUUGGUUUGG	Cleavage
ghy-miR166d	c39159.graph_c0	E3 ubiquitin-protein ligase	3.5	232	252	CUGGGAUGGAUCUUGGUCUGA	Translation
ghy-miR166d	c42748.graph_c0	organic cation/carnitine transporter 4	3.5	404	424	UCGGAAUGGGGUUUGGUCUGU	Cleavage
ghy-miR166d	c44975.graph_c1	ribosome biogenesis protein NSA2 homolog	3.5	923	943	GUCAAAUGAGGUCUGGUCCGG	Cleavage
ghy-miR166d	c15106.graph_c0	hypothetical protein	4	319	339	CCAAAUGGAGCUUGGUCCCGA	Cleavage
ghy-miR166d	c25897.graph_c0	aminopeptidase M4	4	2672	2692	AGGCGGUGAGGUCUGGUUUGA	Cleavage
ghy-miR166d	c29989.graph_c0	amino acid transporter, transmembrane domain-containing protein	4	247	267	UAGGAAUGAUUCCUGGUUUGA	Translation
ghy-miR166d	c30666.graph_c0	unnamed protein product	4	942	962	UCGCGGUGGAGCCUGUUCCGA	Cleavage
ghy-miR166d	c31581.graph_c0	uncharacterized protein	4	467	487	GAGGAUCAAGCUUUGUUCGAA	Cleavage
ghy-miR166d	c32654.graph_c0	unnamed protein product	4	434	454	UAGAAAUGGAGUCGGGUCCGG	Cleavage
ghy-miR166d	c39707.graph_c0	homeobox-leucine zipper protein ATHB-15-like	4	2589	2609	CGAAUGGAGCUUGGUUUCGGA	Cleavage
ghy-miR166d	c3975.graph_c0	glucan endo-1,3-beta-glucosidase 11-like	4	189	209	CGAGACUGAAGCCUCGUCUGA	Cleavage
ghy-miR166d	c42632.graph_c0	E3 ubiquitin-protein ligase ARI7	4	430	450	GCCAAUGCACCCUGGUUCGAA	Cleavage
ghy-miR166d	c42832.graph_c1	stress-related protein-like	4	1172	1192	UGGGCUUUAAGCCUGGUUUGA	Cleavage
ghy-miR166d	c43846.graph_c0	LUTEIN DEFICIENT 5	4	520	540	CAGGUUGAAUUUUGGUCCGAA	Cleavage
ghy-miR166d	c45359.graph_c0	WD repeat-containing protein WDS homolog	4	917	937	CAAGAAUGAAGUUUGGUUUGU	Cleavage
ghy-miR166d	c45797.graph_c0	hypothetical protein	4	4091	4111	CCGUAUGAAGUUUGGACCGGA	Cleavage
ghy-miR166d	c46402.graph_c0	E3 ubiquitin-protein ligase	4	158	178	GGUAUAGAGCCUGAUCCGAGA	Cleavage
ghy-miR166d	c47847.graph_c0	unnamed protein product	4	315	335	AAGCAGUGAAGCUUUGUCCGG	Cleavage
ghy-miR166d	c49450.graph_c0	MAG2-interacting protein 2	4	2050	2068	GCUAUUCCUGAGACUGUCC	Cleavage
ghy-miR166d	c49587.graph_c0	unnamed protein product	4	1610	1630	UUGGGAUGGGGUCUGGUUCUA	Cleavage
ghy-miR166d	c50080.graph_c1	G-type lectin S-receptor-like serine/threonine-protein kinase	4	597	617	CCGGAAUGAAGUUUGGCCGGA	Cleavage
ghy-miR166d	c59980.graph_c0	hypothetical protein	4	11	31	UCCGAAUGAAGUUUGGUCUUA	Cleavage
ghy-miR166d	c76578.graph_c0	LYK5-like protein	4	246	266	GAGGGUCAGGCAUGGUCCGAA	Translation
ghy-miR166d	c9240.graph_c0	hypothetical protein	4	793	813	CCGGAGGAAGUUUGGUACGAA	Cleavage
ghy-miR166d	c12400.graph_c0	unnamed protein product	4.5	899	919	GACAAUGAAGCAUCGUCUGAA	Translation
ghy-miR166d	c13201.graph_c0	C1-like protein	4.5	79	99	UUUAAUAAGGCUUGGUGCGAA	Cleavage
ghy-miR166d	c13885.graph_c0	RNA-directed DNA polymerase	4.5	219	239	UCACAUGGAGCUUGGUUUGGA	Cleavage
ghy-miR166d	c21980.graph_c0	ATP-dependent DNA helicase 2 subunit	4.5	1012	1032	UGGUGUGAAGUCUGGUUUCAA	Cleavage
ghy-miR166d	c238.graph_c0	Retrovirus-related Pol polyprotein from transposon RE1	4.5	256	276	UGCAUUGAAGCUUGGUUAGAA	Cleavage
ghy-miR166d	c24687.graph_c0	hypothetical protein	4.5	657	677	UCGAAUGAAUCUUCGUCUGGA	Cleavage
ghy-miR166d	c3454.graph_c0	hypothetical protein	4.5	123	143	CAGAAUGAAGCUUUGUUUCAA	Cleavage
ghy-miR166d	c38293.graph_c1	FAR1-RELATED SEQUENCE 5-like	4.5	765	785	UUGGAUGAAACUUGGUUGGAA	Cleavage
ghy-miR166d	c39406.graph_c0	DNA-directed RNA polymerase V subunit 5A-like	4.5	2237	2257	UUAAAUGGAACUUGGUUUGAA	Cleavage
ghy-miR166d	c39427.graph_c0	uncharacterized protein	4.5	1253	1273	UGGGAGAGAAGUUUGGUAUGA	Cleavage
ghy-miR166d	c40857.graph_c0	hypothetical protein	4.5	771	791	GUGGCAUGAAUCCUGCUCCGG	Translation
ghy-miR166d	c41519.graph_c0	histone acetyltransferase MCC1	4.5	3273	3292	UAU-CUCACUUUCUUUUGCCA	Cleavage
ghy-miR166d	c42256.graph_c0	myosin-binding protein 7-like	4.5	2245	2265	AAUAAUGAUGCCUGGUAUGAA	Cleavage
ghy-miR166d	c42586.graph_c0	inactive receptor kinase	4.5	525	545	ACCCAAUGAGGCUUGGUUUGG	Cleavage
ghy-miR166d	c44036.graph_c0	hypothetical protein	4.5	656	676	CUGGAGUGGAGCUUUGGCCGA	Cleavage
ghy-miR166d	c44585.graph_c0	Chaperonin Cpn60	4.5	1537	1557	CGGCAAUGAGGCCUUGUGCGA	Cleavage
ghy-miR166d	c46446.graph_c0	calmodulin-binding transcription activator 2-like	4.5	399	419	ACGAGUGAAUUCUGGCCUGAA	Cleavage
ghy-miR166d	c46605.graph_c0	RNA-directed DNA polymerase	4.5	4865	4885	CGAAGAUGGAGUCUGGUUUGA	Cleavage
ghy-miR166d	c48191.graph_c2	inactive glucose-1-phosphate adenylyltransferase small subunit 2	4.5	1572	1592	GAUGAAUGAAACCUGGUUUGC	Translation
ghy-miR166d	c48438.graph_c0	subtilisin-like protease SBT1.2	4.5	2024	2044	AACAAUGGAGCCUCGACCGAA	Cleavage
ghy-miR166d	c48507.graph_c1	hypothetical protein	4.5	310	330	ACCUGUGAAGUCUGGACCGAA	Cleavage
ghy-miR166d	c48746.graph_c2	hypothetical protein	4.5	682	702	GGGAGUUGAAGGCUGGUCUGA	Translation
ghy-miR166d	c48924.graph_c0	187-kDa microtubule-associated protein AIR9	4.5	6067	6087	AGGUUGUGAAGCCUGGUUCCA	Cleavage
ghy-miR166d	c49332.graph_c0	pentatricopeptide (PPR) repeat-containing protein	4.5	1593	1613	GAAAAUGGGGUUUGUUCCGAA	Cleavage
ghy-miR166d	c49489.graph_c1	RNA-directed DNA polymerase	4.5	664	684	UGGCAAUGACCCCUGGUCUGA	Translation
ghy-miR166d	c50289.graph_c0	Leucine-rich repeat-containing protein	4.5	2123	2143	AUGAGUGGAGCUUUGUCGGAA	Cleavage
ghy-miR166d	c50347.graph_c0	phosphatidylinositol 4-kinase gamma 7-like	4.5	476	496	GAAGAUGAAGUUUGGUACGGA	Cleavage
ghy-miR166d	c50382.graph_c0	uncharacterized protein	4.5	386	406	UAGGAAUGGAGUUUGGUACUA	Cleavage
ghy-miR166d	c56228.graph_c0	hypothetical protein	4.5	525	545	UGGGACUGAAUUUUGGUCCGU	Translation
ghy-miR166d	c73613.graph_c0	mitochondrial protein	4.5	212	232	ACCUAUGGAGUUUGGUUUGAA	Cleavage
ghy-miR166d	c92586.graph_c0	hypothetical protein	4.5	17	37	UCAGAAUGAAACUUGGUCCUA	Translation
ghy-miR166d	c30445.graph_c0	phospholipid-transporting ATPase 8	5	557	580	AGAAGUGUUGGAUCCAAGUGAAGU	Cleavage
ghy-miR166d	c31016.graph_c0	uncharacterized protein	5	642	662	UGAGAUGGGGCUUGGAUCGAA	Cleavage
ghy-miR166d	c32063.graph_c0	endoglucanase 5	5	1846	1866	GGUGUUGAAGCCCGGUUCGGA	Cleavage
ghy-miR166d	c33805.graph_c0	transmembrane protein 50 homolog	5	563	583	ACCGGCAAAGCCUGGUCCGAA	Cleavage
ghy-miR166d	c35011.graph_c1	Concanavalin A-like lectin/glucanase superfamily	5	263	283	UGGAGUGUAGCCUUGAUCGAA	Cleavage
ghy-miR166d	c38738.graph_c0	E2F-associated phosphoprotein	5	453	473	CAACUAUGAAGUUUGGUUUGA	Cleavage
ghy-miR166d	c39231.graph_c0	carotenoid 9,10(9',10')-cleavage dioxygenase 1-like	5	1257	1277	CCUGAAUGGAGCUUGGUCUCG	Cleavage
ghy-miR166d	c39787.graph_c0	root phototropism protein 3-like	5	1277	1297	AGCCGAUGAGGUCUGGUCGGA	Cleavage
ghy-miR166d	c41586.graph_c0	phosphoglycerate kinase	5	643	663	AUUUGAUGGAAUCUGGUCCGA	Translation
ghy-miR166d	c41724.graph_c0	cell division cycle-associated protein 7-like	5	951	971	UUCGAAUGAGGCCGAGUCUGA	Cleavage
ghy-miR166d	c41836.graph_c0	P-loop containing nucleoside triphosphate hydrolases superfamily protein	5	1429	1449	UGGGAAUGGAUUUUGGAUCGA	Translation
ghy-miR166d	c42072.graph_c0	N-acetyl-D-glucosamine kinase-like	5	463	483	UGGAAUGCAGUCUGGGCAGGA	Cleavage
ghy-miR166d	c42270.graph_c0	GATA transcription factor 1-like	5	1700	1720	CAAACAUGAAGCUUGGUCCAA	Cleavage
ghy-miR166d	c43187.graph_c0	IQ-DOMAIN 1-like	5	783	803	GGGCUCGGGCCUGGUCCGGGU	Cleavage
ghy-miR166d	c43334.graph_c0	copia LTR rider	5	856	876	UAGGAAUGGAUCUUGGGUCGG	Translation
ghy-miR166d	c44607.graph_c0	unnamed protein product	5	2013	2033	UGAGAGUGAAUUUUGGUUUGA	Translation
ghy-miR166d	c45868.graph_c1	Dehydrogenase, E1 component	5	737	757	CUCAGUACAGGGAGCCAGGAG	Cleavage
ghy-miR166d	c46387.graph_c2	tubulin-folding cofactor D	5	3513	3533	AGGGAAGGAAUCGUGGUUUGA	Translation
ghy-miR166d	c47619.graph_c3	ras-related protein Rab11C-like	5	242	265	AUCUAAAGUUGUAAAUCACUCACA	Translation
ghy-miR166d	c47905.graph_c0	hypothetical protein	5	190	210	GCAUAUGAAGUUUGGUUGGAA	Cleavage
ghy-miR166d	c48238.graph_c0	hypothetical protein	5	1455	1474	UGGAAUGGAGU-UGGUUCGGA	Translation
ghy-miR166d	c48481.graph_c1	unnamed protein product	5	594	614	CGUCGUGAAGUAUGGUCUGAA	Translation
ghy-miR166d	c48899.graph_c0	40S ribosomal protein like	5	1516	1535	UGGAAUGAAGAUUGG-CCGAA	Translation
ghy-miR166d	c48997.graph_c0	Histone acetylation protein 2	5	2631	2652	UGAAUGAAGGUUUGGUCUGAGG	Cleavage
ghy-miR166d	c49056.graph_c1	galactokinase-like	5	952	972	UGGAAUAAAGCUUGGAAUGAA	Cleavage
ghy-miR166d	c49458.graph_c1	trichome birefringence-like	5	3755	3775	CCCAAAUGCGGUCUGGUUCGA	Cleavage
ghy-miR166d	c49741.graph_c0	uncharacterized protein	5	1593	1613	ACAGGAUGAAGCUUGCUACGA	Cleavage
ghy-miR166d	c49962.graph_c1	hypothetical protein	5	1469	1489	AGGAAAUGACACUUGGUUCGA	Translation
ghy-miR166d	c50087.graph_c0	uncharacterized protein	5	2734	2754	UGCUGCAAGUGGAGGAGCAUU	Cleavage
ghy-miR166d	c50356.graph_c0	homeobox-DDT domain protein RLT1-like	5	489	509	GUUCAAUGGAGACUGGUUCGG	Translation
ghy-miR166d	c62161.graph_c0	retrovirus-related Pol polyprotein from transposon TNT 1-94	5	290	310	CCUUAUGAGGCCUGGUAUGGA	Cleavage
ghy-miR166e	c44513.graph_c1	transcription factor bHLH68-like	0	1359	1379	GGGGAAUGAAGCCUGGUCCGA	Cleavage
ghy-miR166e	c46724.graph_c0	hypothetical protein	2.5	837	857	GGGGAGUGGGGUCUGGUUCGA	Cleavage
ghy-miR166e	c51336.graph_c0	uncharacterized protein	3	970	990	CAGGAAAGAAACCUGGUCUGA	Translation
ghy-miR166e	c14385.graph_c0	piezo-type mechanosensitive ion channel homolog	3.5	251	271	UUGCAAUGAAGCCUGGUUUCA	Cleavage
ghy-miR166e	c20543.graph_c0	MARD1-like protein	3.5	1002	1022	UUUUGAAGAAGCCUGGUCCGA	Cleavage
ghy-miR166e	c30468.graph_c0	inositol-tetrakisphosphate 1-kinase 3-like	3.5	12	32	UCUGAAAGAGGCCUGGUUUGA	Cleavage
ghy-miR166e	c31268.graph_c0	hypothetical protein	3.5	72	92	GUCGAAUGGAGCUUGGUUUGG	Cleavage
ghy-miR166e	c39159.graph_c0	E3 ubiquitin-protein ligase	3.5	232	252	CUGGGAUGGAUCUUGGUCUGA	Translation
ghy-miR166e	c42748.graph_c0	organic cation/carnitine transporter 4	3.5	404	424	UCGGAAUGGGGUUUGGUCUGU	Cleavage
ghy-miR166e	c44975.graph_c1	ribosome biogenesis protein NSA2 homolog	3.5	923	943	GUCAAAUGAGGUCUGGUCCGG	Cleavage
ghy-miR166e	c25897.graph_c0	aminopeptidase M2	4	2672	2692	AGGCGGUGAGGUCUGGUUUGA	Cleavage
ghy-miR166e	c29989.graph_c0	amino acid transporter, transmembrane domain-containing protein	4	247	267	UAGGAAUGAUUCCUGGUUUGA	Translation
ghy-miR166e	c30666.graph_c0	unnamed protein product	4	942	962	UCGCGGUGGAGCCUGUUCCGA	Cleavage
ghy-miR166e	c32654.graph_c0	unnamed protein product	4	434	454	UAGAAAUGGAGUCGGGUCCGG	Cleavage
ghy-miR166e	c3975.graph_c0	glucan endo-1,3-beta-glucosidase 11-like	4	189	209	CGAGACUGAAGCCUCGUCUGA	Cleavage
ghy-miR166e	c39841.graph_c0	Glycoside hydrolase, catalytic domain-containing protein	4	1345	1365	AAGAUAAGAGGCCUGGUCCGG	Cleavage
ghy-miR166e	c45359.graph_c0	WD repeat-containing protein WDS homolog	4	917	937	CAAGAAUGAAGUUUGGUUUGU	Cleavage
ghy-miR166e	c47847.graph_c0	unnamed protein product	4	315	335	AAGCAGUGAAGCUUUGUCCGG	Cleavage
ghy-miR166e	c49587.graph_c0	unnamed protein product	4	1610	1630	UUGGGAUGGGGUCUGGUUCUA	Cleavage
ghy-miR166e	c50080.graph_c1	G-type lectin S-receptor-like serine/threonine-protein kinase	4	597	617	CCGGAAUGAAGUUUGGCCGGA	Cleavage
ghy-miR166e	c59980.graph_c0	hypothetical protein	4	11	31	UCCGAAUGAAGUUUGGUCUUA	Cleavage
ghy-miR166e	c69459.graph_c0	MACPF domain-containing protein NSL1-like	4	275	295	UCGGAAUGAAACCUGGUGCGU	Translation
ghy-miR166e	c16578.graph_c0	pentatricopeptide repeat-containing protein	4.5	797	817	AAGGACUGAGGCCUGAUCCCA	Cleavage
ghy-miR166e	c35305.graph_c0	transcription factor MYB3R-4	4.5	796	816	AAGAAGAGACGCCUGGUCUGA	Cleavage
ghy-miR166e	c39427.graph_c0	uncharacterized protein	4.5	1253	1273	UGGGAGAGAAGUUUGGUAUGA	Cleavage
ghy-miR166e	c41733.graph_c0	uncharacterized protein	4.5	1675	1695	CGGGUAUGGAGCGUGGUUCGU	Cleavage
ghy-miR166e	c41931.graph_c0	hypothetical protein	4.5	656	676	ACGGGAUGAAGAUUGGUUUGU	Translation
ghy-miR166e	c42313.graph_c0	uncharacterized protein	4.5	991	1011	GAGAGAUAAAACCUGGUUCGA	Translation
ghy-miR166e	c42586.graph_c0	inactive receptor kinase	4.5	525	545	ACCCAAUGAGGCUUGGUUUGG	Cleavage
ghy-miR166e	c44036.graph_c0	hypothetical protein	4.5	656	676	CUGGAGUGGAGCUUUGGCCGA	Cleavage
ghy-miR166e	c44585.graph_c0	Chaperonin Cpn60	4.5	1537	1557	CGGCAAUGAGGCCUUGUGCGA	Cleavage
ghy-miR166e	c45506.graph_c0	uncharacterized protein	4.5	811	831	CGGGAGUGAAGUUGGGUCUGC	Cleavage
ghy-miR166e	c46605.graph_c0	RNA-directed DNA polymerase	4.5	4865	4885	CGAAGAUGGAGUCUGGUUUGA	Cleavage
ghy-miR166e	c46903.graph_c3	3-hexulose-7-phosphate isomerase	4.5	1005	1025	GAGGAGUGGAUCCUGGUGUGA	Translation
ghy-miR166e	c48191.graph_c2	inactive glucose-1-phosphate adenylyltransferase small subunit 2	4.5	1572	1592	GAUGAAUGAAACCUGGUUUGC	Translation
ghy-miR166e	c48218.graph_c0	pentatricopeptide repeat-containing protein	4.5	2360	2380	AAGGUAUGAAGCCUGAUGUGA	Cleavage
ghy-miR166e	c48746.graph_c2	hypothetical protein	4.5	682	702	GGGAGUUGAAGGCUGGUCUGA	Translation
ghy-miR166e	c49258.graph_c0	glutamate receptor 3.6-like	4.5	458	478	UGGGAAUUGAGCCUGAUUUGG	Cleavage
ghy-miR166e	c49349.graph_c3	beta-1,3-galactosyltransferase 2	4.5	2106	2126	GAUGUAUGAAAUCUGGUCCGG	Translation
ghy-miR166e	c49489.graph_c1	RNA-directed DNA polymerase	4.5	664	684	UGGCAAUGACCCCUGGUCUGA	Translation
ghy-miR166e	c49721.graph_c2	hypothetical protein	4.5	2396	2416	UAGGAAUUUGGCCUGGUCGGA	Cleavage
ghy-miR166e	c49999.graph_c1	formin-like protein 1	4.5	1995	2015	CACCGAUCAAGCUUGGUCCGG	Cleavage
ghy-miR166e	c50382.graph_c0	uncharacterized protein	4.5	386	406	UAGGAAUGGAGUUUGGUACUA	Cleavage
ghy-miR166e	c50406.graph_c0	Retrovirus-related Pol polyprotein from transposon TNT 1-94	4.5	1307	1327	AAGCUGUGAACCUUGGUCCGA	Translation
ghy-miR166e	c56006.graph_c0	Retrovirus-related Pol polyprotein from transposon TNT 1-94	4.5	161	181	CCCGAUUGAAGUUUGGUCCAA	Cleavage
ghy-miR166e	c56228.graph_c0	hypothetical protein	4.5	525	545	UGGGACUGAAUUUUGGUCCGU	Translation
ghy-miR166e	c92586.graph_c0	hypothetical protein	4.5	17	37	UCAGAAUGAAACUUGGUCCUA	Translation
ghy-miR166e	c16817.graph_c0	Ty3/gypsy retrotransposon protein	5	251	271	GGGGGAUCAAGGCUGGUUAGA	Translation
ghy-miR166e	c17929.graph_c0	chaperonin CPN60-2	5	171	190	AGGGAAUGAAGU-UGGACCGA	Cleavage
ghy-miR166e	c24686.graph_c0	zein-binding domain-containing protein	5	190	210	AAGGAAAGAAACCUGAUUUGA	Translation
ghy-miR166e	c25047.graph_c0	uncharacterized protein	5	759	779	GAGAAAUGAAGUUUCGGCCGA	Cleavage
ghy-miR166e	c26041.graph_c0	serine/threonine protein kinase IREH1	5	6	26	AUCGAAUGUAGUCUGGUUCAA	Cleavage
ghy-miR166e	c30519.graph_c0	uncharacterized protein	5	875	895	GGAGGAGGAAGACUGGUUUGA	Translation
ghy-miR166e	c32486.graph_c0	uncharacterized protein	5	403	423	GAGGCGUAGAACCUGGUCCGG	Translation
ghy-miR166e	c37266.graph_c0	HAIKU1-like protein	5	501	521	AAGGAUUGAAGCUUUCUUCGA	Cleavage
ghy-miR166e	c38738.graph_c0	E2F-associated phosphoprotein	5	453	473	CAACUAUGAAGUUUGGUUUGA	Cleavage
ghy-miR166e	c39231.graph_c0	carotenoid 9,10(9',10')-cleavage dioxygenase 1-like	5	1257	1277	CCUGAAUGGAGCUUGGUCUCG	Cleavage
ghy-miR166e	c39787.graph_c0	root phototropism protein 3-like	5	1277	1297	AGCCGAUGAGGUCUGGUCGGA	Cleavage
ghy-miR166e	c41288.graph_c0	ATP synthase gamma chain	5	334	354	AAGCAAUGAAGCUUGUUGCGG	Cleavage
ghy-miR166e	c41586.graph_c0	phosphoglycerate kinase	5	643	663	AUUUGAUGGAAUCUGGUCCGA	Translation
ghy-miR166e	c41836.graph_c0	P-loop containing nucleoside triphosphate hydrolases superfamily protein	5	1429	1449	UGGGAAUGGAUUUUGGAUCGA	Translation
ghy-miR166e	c42270.graph_c0	GATA transcription factor 1-like	5	1700	1720	CAAACAUGAAGCUUGGUCCAA	Cleavage
ghy-miR166e	c43334.graph_c0	copia LTR rider	5	856	876	UAGGAAUGGAUCUUGGGUCGG	Translation
ghy-miR166e	c43652.graph_c0	uncharacterized protein	5	755	775	GAGAGAUCAAGUCUAGUCCGG	Cleavage
ghy-miR166e	c45478.graph_c3	uncharacterized protein	5	366	386	GAGGUCCGAGGUCUGGUCCGU	Cleavage
ghy-miR166e	c45802.graph_c0	ubiquitin domain-containing protein DSK2a-like	5	557	577	CAGAGAUGAUGCGUGGUCUGA	Cleavage
ghy-miR166e	c45868.graph_c1	Dehydrogenase, E1 component	5	737	757	CUCAGUACAGGGAGCCAGGAG	Cleavage
ghy-miR166e	c47804.graph_c0	clathrin interactor EPSIN 2-like	5	1224	1244	GGGGAAUGUGGUCUGGUUGGG	Cleavage
ghy-miR166e	c47870.graph_c0	splicing factor U2af small subunit B-like	5	2542	2562	UAGGGCUGAUGCUUGGUUUGG	Cleavage
ghy-miR166e	c47944.graph_c0	ABC transporter B family member 8	5	2069	2089	CGACGGUGGAGCUUGGUUUGA	Cleavage
ghy-miR166e	c48447.graph_c0	protein phosphatase 2C 70	5	1669	1689	UCCAAAUGAAGACUGGUCUGU	Translation
ghy-miR166e	c48658.graph_c0	Retrovirus-related Pol polyprotein from transposon TNT 1-94	5	849	869	GGGUGAUGAACCCUUGUCUGA	Translation
ghy-miR166e	c49458.graph_c1	trichome birefringence-like	5	3755	3775	CCCAAAUGCGGUCUGGUUCGA	Cleavage
ghy-miR166e	c49865.graph_c0	photosystem I P700 apoprotein A1	5	890	909	AGGGAAUGAGGU-UGGUCCGC	Cleavage
ghy-miR166e	c50508.graph_c0	hypothetical protein	5	847	867	CGGGAAUGAAUCUUGGUUGGC	Translation
ghy-miR166e	c55570.graph_c0	hypothetical protein	5	44	64	CGGGAAUGAAGUUUAUUUCGG	Cleavage
ghy-miR166e	c83640.graph_c0	ribonuclease H-like domain-containing protein	5	92	112	CGGGAGUGAGGCUAGGUUUGC	Cleavage
ghy-miR167	c34629.graph_c0	piezo-type mechanosensitive ion channel homolog	3	1935	1955	CCGAUCAUUUUGGCAGCUUCU	Cleavage
ghy-miR167	c41744.graph_c0	nudix hydrolase 2	3	146	168	UAGAUUUUUCAUCAUCAUUGUUA	Cleavage
ghy-miR167	c45376.graph_c0	Zinc finger, RING/FYVE/PHD-type	3	1252	1272	GUGAUCUUGCUGGCAGUUGCA	Cleavage
ghy-miR167	c49506.graph_c0	uncharacterized protein	3	1872	1892	ACGAUUGUGUUGGCAACUUCA	Cleavage
ghy-miR167	c50891.graph_c0	AAA+ ATPase domain-containing protein	3	897	917	GAUGUCAUGCUGUCAGCUUCA	Cleavage
ghy-miR167	c37210.graph_c0	uncharacterized protein	3.5	491	511	AUGAUGAUGUUGACGGCUUCA	Cleavage
ghy-miR167	c44329.graph_c0	RING-H2 finger protein ATL2	3.5	1019	1039	AGGGUCAUUUUGGCGGCUUCG	Cleavage
ghy-miR167	c44604.graph_c0	G patch domain-containing protein TGH	3.5	768	788	AAUGUCGUGUUGGCGGCUUCG	Cleavage
ghy-miR167	c45016.graph_c0	unnamed protein product	3.5	263	283	CCGAUGAUGUUGGCAACUUUA	Cleavage
ghy-miR167	c46025.graph_c0	phospholipase A-2-activating protein	3.5	208	228	CCGAUUACGCUGUCAGCUUCG	Cleavage
ghy-miR167	c46585.graph_c0	ribonucleoside-diphosphate reductase large subunit	3.5	1486	1506	AUCUCAGUACAGAGAUUUGAA	Cleavage
ghy-miR167	c47275.graph_c0	topless-related protein 4-like	3.5	1540	1560	AGGCUCAUGCUGGCAGUGUUA	Cleavage
ghy-miR167	c48441.graph_c0	autophagy-related protein 9	3.5	2040	2060	UAGGUCAUGUUUGCAGUUUUA	Translation
ghy-miR167	c48795.graph_c0	ADP-ribosylation factor GTPase-activating protein AGD14	3.5	888	908	AAGAACAUGUUGGUAGAUUCA	Cleavage
ghy-miR167	c58443.graph_c0	hypothetical protein	3.5	586	606	UAGAUCAUGUUGGGAUCUUCA	Cleavage
ghy-miR167	c14865.graph_c0	hypothetical protein	4	784	804	CGGAUGGUGUUUGCAGCUUUA	Translation
ghy-miR167	c20808.graph_c0	Armadillo-like helical	4	302	322	GCAAUAAUGGUGGCAGCUUCG	Cleavage
ghy-miR167	c22055.graph_c0	uncharacterized protein	4	1197	1217	UUGAUCUUGUUGGUGGGUUCA	Cleavage
ghy-miR167	c23452.graph_c0	Armadillo-like helical	4	659	679	CAAAUCAUGGUGGUGGUUUCA	Cleavage
ghy-miR167	c30294.graph_c0	mediator of RNA polymerase II transcription subunit 26b	4	613	633	GCGAUCAUGAUGGCUGCUUCU	Cleavage
ghy-miR167	c35435.graph_c0	EH domain-containing protein 1-like	4	929	949	AACUUCAUGCUGGAAGCUUUA	Cleavage
ghy-miR167	c35986.graph_c0	hypothetical protein	4	553	573	GAAGUCAUGAUGGCAGUUUUA	Cleavage
ghy-miR167	c36056.graph_c0	growth-regulating factor 1-like	4	452	472	AGAGCUCACUCUUUUCUUUCU	Cleavage
ghy-miR167	c39123.graph_c0	unnamed protein product	4	528	548	GAGGAUAUACUGGCAGCUUUA	Cleavage
ghy-miR167	c39123.graph_c0	unnamed protein product	4	528	548	GAGGAUAUACUGGCAGCUUUA	Cleavage
ghy-miR167	c39847.graph_c0	pre-mRNA-splicing factor SLU7-like	4	1262	1282	AUGAUCGUGCUGGUAGGGUCA	Cleavage
ghy-miR167	c40080.graph_c0	mRNA turnover protein 4 homolog	4	732	752	AAGAAUCUGCUGGUGGCUUUA	Cleavage
ghy-miR167	c40242.graph_c0	gibberellin 20 oxidase 1-D-like	4	449	469	GUGGUUAUGCUAGUAGUUUUA	Translation
ghy-miR167	c40903.graph_c0	proton-dependent oligopeptide transporter family	4	217	237	AUGAUCAAGCUUGCGGCUUCC	Translation
ghy-miR167	c41292.graph_c1	transcription factor bHLH130-like	4	591	611	GAGGUUAUGUUGCCAGCUUCC	Cleavage
ghy-miR167	c44681.graph_c0	replication protein A 70 kDa DNA-binding subunit B	4	683	706	GUACAUUGACCGACCUCCAGUUUU	Cleavage
ghy-miR167	c45161.graph_c0	hypothetical protein	4	3178	3201	UUUUUAUUUUAAUAGUUAAGUGAU	Cleavage
ghy-miR167	c47544.graph_c0	Retrovirus-related Pol polyprotein from transposon TNT 1-94	4	1305	1325	CACAUUGUGUUGACAGCUUCA	Cleavage
ghy-miR167	c47576.graph_c0	histone deacetylase 5	4	3321	3341	UUGAUCAUGUUGAGGGCUUCA	Cleavage
ghy-miR167	c47629.graph_c0	tubulin alpha-1 chain-like	4	791	811	GCCAUCAUGCUUGCAGGUUCA	Translation
ghy-miR167	c49450.graph_c0	MAG2-interacting protein 2	4	2050	2068	GCUAUUCCUGAGACUGUCC	Cleavage
ghy-miR167	c59122.graph_c0	hypothetical protein	4	158	178	GUCAUCAUGAUGGUGGCUUUA	Cleavage
ghy-miR167	c76606.graph_c0	uncharacterized protein	4	338	358	CAUGUUAUGUUGACAGCUUCA	Cleavage
ghy-miR167	c82928.graph_c0	receptor-like protein kinase	4	92	112	UGGAACAUGUUGGCGGAUUUA	Cleavage
ghy-miR167	c21802.graph_c0	uncharacterized protein	4.5	355	375	GAGAUGAUGUUGGUAGCUUAU	Cleavage
ghy-miR167	c24994.graph_c0	far upstream element-binding protein 1	4.5	2833	2853	CUGGAGGGUACCCUGGUCAAC	Cleavage
ghy-miR167	c30310.graph_c0	unnamed protein product	4.5	814	834	GUGGUCAUGAUGGCAGAUUUG	Cleavage
ghy-miR167	c34453.graph_c0	protease Do-like 7	4.5	814	834	UUCUACAUGCAGGCAGCUUCA	Translation
ghy-miR167	c35259.graph_c0	PUB domain-containing protein	4.5	1384	1404	UAGAAAAUGUUGGUUGCUUCA	Cleavage
ghy-miR167	c35274.graph_c0	uncharacterized protein	4.5	1353	1371	UUUCUAUCUGAGGCGGUUU	Cleavage
ghy-miR167	c35576.graph_c0	pentatricopeptide repeat-containing protein	4.5	625	645	UGGUUCACGUUGGCAUUUUCA	Cleavage
ghy-miR167	c37532.graph_c0	secoisolariciresinol dehydrogenase-like	4.5	73	93	CAGGUGGUGCUAGCGGCUUCG	Translation
ghy-miR167	c38916.graph_c0	Retrovirus-related Pol polyprotein from transposon TNT 1-94	4.5	193	213	CAGAAUGUGCUAGCAGUUUUA	Translation
ghy-miR167	c40659.graph_c0	alanine--glyoxylate aminotransferase 2 homolog 3	4.5	1372	1392	UGAUGAAAGAUUUGGGGGUAU	Cleavage
ghy-miR167	c43281.graph_c0	uncharacterized protein	4.5	633	653	GCCAUCAUCAUGGCAGCUUUA	Cleavage
ghy-miR167	c44379.graph_c0	BEL1-like homeodomain protein 8	4.5	216	236	AAGUUCAUGCAGGAAGUUUCA	Translation
ghy-miR167	c46430.graph_c0	pentatricopeptide repeat-containing protein	4.5	1250	1270	AAGAUCAAGCGCGCAGCUUUA	Translation
ghy-miR167	c46616.graph_c0	uncharacterized protein	4.5	183	203	CUUCAAAUGCUGGCAGCUUUA	Cleavage
ghy-miR167	c47191.graph_c0	uncharacterized protein	4.5	2124	2144	UAGAUCAUGCCGGCUGUUUUG	Translation
ghy-miR167	c47370.graph_c2	dihydroceramide fatty acyl 2-hydroxylase FAH1-like	4.5	3303	3323	AUGAUCAUCUUGGUGUCUUCA	Cleavage
ghy-miR167	c47482.graph_c1	phosphatidylinositol 3,4,5-trisphosphate 3-phosphatase and protein-tyrosine-phosphatase PTEN2A	4.5	520	540	GGGGUCGUGCUUGUACCUUCA	Translation
ghy-miR167	c47885.graph_c0	RNA-directed DNA polymerase	4.5	3313	3333	UCACUCAUGUUGGCACCUUUA	Cleavage
ghy-miR167	c48104.graph_c0	uncharacterized protein	4.5	1076	1096	UGAGUAAUGCUGGUAGUUUUG	Cleavage
ghy-miR167	c48845.graph_c0	beta-Amyrin Synthase 2-like	4.5	2938	2961	CAUGAAAAACAUUGGACCAGCAUU	Cleavage
ghy-miR167	c49879.graph_c1	uncharacterized protein	4.5	5139	5159	CAAAUCAUUCUUGUAGCUUCA	Translation
ghy-miR167	c49879.graph_c1	uncharacterized protein	4.5	5139	5159	CAAAUCAUUCUUGUAGCUUCA	Translation
ghy-miR167	c50366.graph_c1	hypothetical protein	4.5	1890	1910	GAGGUGGUGUUGGUGGUUUCG	Cleavage
ghy-miR167	c51192.graph_c0	GRAVITROPIC IN THE LIGHT 1	4.5	556	576	UGGAUUGAGUUUGCAGCUUCG	Translation
ghy-miR167	c54223.graph_c0	leucine-rich repeat protein kinase family protein	4.5	944	964	UGGUUCGUGCAGACAGCUUCA	Translation
ghy-miR167	c73814.graph_c0	hypothetical protein	4.5	64	84	CAUGUUGUGUUGACAGCUUCA	Cleavage
ghy-miR167	c85165.graph_c0	Tubulin beta chain	4.5	160	180	AAGAAUAUGAUGGCAGCCUCA	Cleavage
ghy-miR167	c13334.graph_c0	unnamed protein product	5	419	439	CCUUUCAUGGUGGCACCUUCA	Cleavage
ghy-miR167	c24831.graph_c0	VACUOLELESS1	5	674	693	UAGAUCAUGCUG-CAUCUUUA	Cleavage
ghy-miR167	c25673.graph_c0	MATH-like protein	5	332	352	AAAAUUAUGCUGCCAUCUUUA	Cleavage
ghy-miR167	c30224.graph_c0	transcription factor TCP8	5	260	283	GUGUUGUUGAUGGUGAGGAUGAUU	Translation
ghy-miR167	c35656.graph_c0	unnamed protein product	5	98	118	CGGGUCAUGUUUGUGGGUUCA	Translation
ghy-miR167	c35744.graph_c0	mitochondrial import inner membrane translocase subunit Tim9	5	158	178	CGGAUUGUGUGGACAGUUUCA	Translation
ghy-miR167	c37344.graph_c0	zinc finger protein WIP6	5	985	1005	GAAGUCAUGGUGGUAGCUUUC	Cleavage
ghy-miR167	c39244.graph_c0	Filamin/ABP280 repeat-like protein	5	332	352	GAGAUUGAGCUUGCAGUUUCU	Translation
ghy-miR167	c39244.graph_c0	Filamin/ABP280 repeat-like protein	5	332	352	GAGAUUGAGCUUGCAGUUUCU	Translation
ghy-miR167	c39544.graph_c0	ethylene-responsive transcription factor TINY-like	5	590	610	UGGUUCAUGGCGGCAGCUUUG	Translation
ghy-miR167	c39597.graph_c0	unnamed protein product	5	1763	1783	CGUGUGGUUUUAUGAUUUAAA	Translation
ghy-miR167	c39928.graph_c0	uncharacterized protein	5	774	794	UAUAUGAUGCUGGCAUCUUUU	Cleavage
ghy-miR167	c40399.graph_c0	uncharacterized protein	5	916	936	AAGAUUACGAUGAUAGCUUCA	Cleavage
ghy-miR167	c41936.graph_c0	uncharacterized protein	5	1109	1129	CGGAUUGUGAUGGUUGCUUCG	Cleavage
ghy-miR167	c42749.graph_c0	hypothetical protein	5	145	165	UAGAUGAUGCUGAUAACUUUA	Cleavage
ghy-miR167	c44885.graph_c0	GTP-binding protein SAR1A-like	5	764	784	UGGGUUAUGGUGACGGCUUUA	Cleavage
ghy-miR167	c44963.graph_c0	actin-histidine N-methyltransferase	5	903	923	GCCGCCAUGCUGGCGGCAUCA	Cleavage
ghy-miR167	c45193.graph_c0	pectate lyase 4	5	408	428	UGGAUCGUGUUUGAAGUUUCG	Translation
ghy-miR167	c45731.graph_c0	uncharacterized protein	5	1805	1825	UAGGUUGUGGUGGCAGUAUCA	Cleavage
ghy-miR167	c47205.graph_c0	indeterminate-domain 2-like	5	2017	2037	UUGAUCAUGUUGGUAGCUGAC	Cleavage
ghy-miR167	c48049.graph_c1	O-fucosyltransferase 35	5	1392	1415	GUUUUCUUUCAGGUUAGUUAUUAU	Cleavage
ghy-miR167	c48467.graph_c0	ribonuclease E/G-like protein	5	2365	2385	UCUUUGUGAUCGAGUUGAGUU	Cleavage
ghy-miR167	c50400.graph_c0	uncharacterized protein	5	6089	6109	UAAAUGAUGAUGGAAGCUUCA	Cleavage
ghy-miR167	c50610.graph_c0	uncharacterized protein	5	624	644	UAAAUGAUGUUGGUUGUUUCA	Cleavage
ghy-miR167	c50764.graph_c0	unnamed protein product	5	198	218	UAGAUGAUGUCGGUAGUUUCU	Translation
ghy-miR167	c51276.graph_c0	hypothetical protein	5	35	55	UAUAUUAUUUUCGCAGCUUCA	Translation
ghy-miR167	c64234.graph_c0	WRKY transcription factor 9	5	261	281	UCAUUCAUUGUGGCAGCUUCA	Cleavage
ghy-miR167	c72636.graph_c0	zinc finger, C2H2	5	332	352	AAGGUCACGUUGGAAGGUUCA	Cleavage
ghy-miR167	c90165.graph_c0	hypothetical protein	5	182	203	UAGAUCUUGUUGAGCAGCUUUA	Cleavage
ghy-miR167	c91116.graph_c0	eukaryotic translation initiation factor 5A-4	5	30	50	AAGAUCUUGUUGUCAGUGUCA	Cleavage
ghy-miR168	c35295.graph_c0	argonaute 1-like protein	1	531	551	UACCCGAGCUGCACCAAGCAA	Cleavage
ghy-miR168	c44344.graph_c1	argonaute 1-like protein	1.5	236	256	UUCCCGAGCUGUACCAAGCAA	Cleavage
ghy-miR168	c89552.graph_c0	FAD-dependent pyridine nucleotide-disulfide oxidoreductase	1.5	79	99	GGCCUGACCUGCACCGAGCAG	Cleavage
ghy-miR168	c50028.graph_c0	pentatricopeptide repeat-containing protein	2	729	752	ACACUCGUAGUAUAAAAUAGUUAU	Cleavage
ghy-miR168	c29808.graph_c0	hypothetical protein	3	596	616	GCCACUACCUGCACUGAGCAA	Cleavage
ghy-miR168	c36719.graph_c0	uncharacterized protein	3	1825	1845	CACCCGACCUGUACCAACCAC	Cleavage
ghy-miR168	c46412.graph_c0	ABC transporter C family member 2-like	3	755	775	AACCUGACCAGCAUCAAGCAG	Cleavage
ghy-miR168	c46541.graph_c0	hypothetical protein	3	1232	1255	AAGACUCCUACACCCACAGGCAUU	Translation
ghy-miR168	c50474.graph_c0	bifunctional purple acid phosphatase 26	3	2413	2436	CCGGCCAUUGGUUCCAAAUAAAAU	Cleavage
ghy-miR168	c41261.graph_c0	peroxisome biogenesis protein 1	3.5	2092	2112	CAUGCUCCUUCUCUUCUGGUA	Cleavage
ghy-miR168	c42813.graph_c0	mediator of RNA polymerase II transcription subunit 15a	3.5	3352	3372	UGCCGGAUCAGCACCAGGCAA	Cleavage
ghy-miR168	c42982.graph_c0	phosphatidylinositol 4-kinase gamma 3-like	3.5	453	473	AUCUUGUUCUGCAUCAAGCGA	Cleavage
ghy-miR168	c46093.graph_c3	uncharacterized protein	3.5	1416	1439	GAUUCCGUCCGGCGACGGUUUCUC	Cleavage
ghy-miR168	c46453.graph_c0	beta-galactosidase 17	3.5	2823	2844	GACACUGUUUAUGACAUUUUGU	Cleavage
ghy-miR168	c50102.graph_c1	tRNA (cytosine(38)-C(5))-methyltransferase-like	3.5	2648	2671	CGUAAGCCUUCGGCAACGUUACGC	Cleavage
ghy-miR168	c50471.graph_c0	nuclear cap-binding protein subunit 1	3.5	3886	3906	GGCCGGACCUGCACUAGCCAA	Cleavage
ghy-miR168	c12644.graph_c1	flocculation protein FLO11	4	283	303	UUCCCCACUUGCGACAAGCAG	Cleavage
ghy-miR168	c15551.graph_c0	WD40 repeat-containing protein	4	566	586	CCUUCGACCCGCACCAACCAA	Cleavage
ghy-miR168	c20808.graph_c0	Armadillo-like helical	4	302	322	GCAAUAAUGGUGGCAGCUUCG	Cleavage
ghy-miR168	c22212.graph_c0	pentatricopeptide repeat-containing protein	4	879	899	AAUCCGACAUGCACCAAGAAG	Cleavage
ghy-miR168	c30248.graph_c0	ethylene-responsive transcription factor ABR1-like	4	147	167	CACCUGAUUUGUACCAAGGGA	Cleavage
ghy-miR168	c31316.graph_c0	CELLULOSE SYNTHASE INTERACTIVE 1-like	4	2423	2443	CGGGGAGGUACCUUGGGCCUG	Cleavage
ghy-miR168	c39047.graph_c0	RNA-directed DNA polymerase	4	173	193	CUUUCUACCUGUACUAAGUAG	Cleavage
ghy-miR168	c39313.graph_c0	uncharacterized GPI-anchored protein	4	956	976	GACCCGGUCUGGACCGGGUAA	Translation
ghy-miR168	c40993.graph_c0	UDP-glucose:glycoprotein glucosyltransferase	4	873	896	UCUUAUUUAAUUCUGAUAUGGAUU	Cleavage
ghy-miR168	c42580.graph_c0	pentatricopeptide repeat-containing protein	4	634	654	UAUUCGACAAGCACCAAGCAA	Cleavage
ghy-miR168	c43497.graph_c0	callose synthase 3	4	3706	3726	UGAAUCGUAUAGAGGAGCACU	Cleavage
ghy-miR168	c47071.graph_c0	hypothetical protein	4	1710	1730	UGCCCAACUUGCACCAAGAAC	Cleavage
ghy-miR168	c47444.graph_c1	kinesin-like protein KIN-14J	4	479	499	UCCCCGACUUGCGUUGUGCAA	Cleavage
ghy-miR168	c47444.graph_c1	kinesin-like protein KIN-14J	4	479	499	UCCCCGACUUGCGUUGUGCAA	Cleavage
ghy-miR168	c47965.graph_c0	unnamed protein product	4	604	624	GUCCUGUACUGCACCAAGAAA	Cleavage
ghy-miR168	c48787.graph_c0	RRP12-like protein	4	1785	1805	ACCCUGAUCGGCACCAAGUAC	Cleavage
ghy-miR168	c89745.graph_c0	hypothetical protein	4	208	228	AGCCUGAGCUGCACCAAACAU	Cleavage
ghy-miR168	c20702.graph_c0	uncharacterized protein	4.5	90	110	CUCCCGACUACUAUCAAGCAA	Translation
ghy-miR168	c21319.graph_c0	CURVATURE THYLAKOID 1A	4.5	147	167	UUUCCGACUUCCAUCAAGCUA	Translation
ghy-miR168	c21980.graph_c0	ATP-dependent DNA helicase 2 subunit	4.5	1012	1032	UGGUGUGAAGUCUGGUUUCAA	Cleavage
ghy-miR168	c25462.graph_c0	SWR1 complex subunit 6	4.5	308	328	AUCCAGGUUUGCAUCAUGCAA	Cleavage
ghy-miR168	c30944.graph_c1	hypothetical protein	4.5	294	314	CCAAGUGUGUAUAAGUGAAGA	Translation
ghy-miR168	c33276.graph_c0	unnamed protein product	4.5	21	41	GUUUCGAGCUGCACCAAAUGA	Cleavage
ghy-miR168	c34778.graph_c0	dynamin-related protein 5A-like	4.5	23	43	UUUGCGACCUGGACUAAGCAC	Translation
ghy-miR168	c39321.graph_c0	Retrovirus-related Pol polyprotein from transposon TNT 1-94	4.5	371	391	GUUUCGAUUUGCGCAGAGCAA	Cleavage
ghy-miR168	c40841.graph_c0	chloride channel protein CLC-c-like	4.5	2451	2471	UUGCAUUUAGGGAGCUCGGCC	Cleavage
ghy-miR168	c44599.graph_c0	DJ-1 homolog B	4.5	1559	1579	UGCCCGAUCUGUGUAAAGCAU	Cleavage
ghy-miR168	c46360.graph_c0	short integuments 2,	4.5	732	752	AUCUUGAGUUACACCAGGCAA	Translation
ghy-miR168	c47429.graph_c0	ELMO domain-containing protein A-like	4.5	777	797	CAGUUGACCUGUAUUAAGCAU	Cleavage
ghy-miR168	c48340.graph_c1	hypothetical protein	4.5	3228	3251	ACCAAUUUUUUCAUGACAUACAUU	Cleavage
ghy-miR168	c48405.graph_c0	glycogen phosphorylase 1-like	4.5	2492	2512	AUCCUGACCUGCAACAAGAAU	Cleavage
ghy-miR168	c48961.graph_c0	NLP7-like protein	4.5	670	690	GACCCGAACUGCACCGGGCUU	Cleavage
ghy-miR168	c48981.graph_c0	serine carboxypeptidase-like 13	4.5	654	674	AUCCCGUUCUGCACAAAGCCA	Cleavage
ghy-miR168	c49250.graph_c0	uncharacterized protein	4.5	5166	5189	UAGCAUCAGGUCUGGUUAAGGUUU	Cleavage
ghy-miR168	c49625.graph_c0	hypothetical protein	4.5	702	722	AUUCCUACCUUUGUCAAGCAA	Translation
ghy-miR168	c50177.graph_c0	uncharacterized protein	4.5	4273	4296	UUCUGUAAGCUUCCAUGUUUUAAU	Cleavage
ghy-miR168	c50201.graph_c0	G-type lectin S-receptor-like serine/threonine-protein kinase	4.5	3139	3162	CCGAUUGCUUGAUCUGCAGCUAUG	Cleavage
ghy-miR168	c66836.graph_c0	Retrovirus-related Pol polyprotein from transposon RE2	4.5	213	233	AUCCUGGUUGGCAUCAGGCAA	Cleavage
ghy-miR168	c69035.graph_c0	RNA-directed DNA polymerase	4.5	229	249	AUCCCAACUUCCAUUGAGCAA	Translation
ghy-miR168	c79762.graph_c0	uncharacterized protein	4.5	27	47	UCCUUGACUGGUACCAAGCAC	Cleavage
ghy-miR168	c87840.graph_c0	biotin synthase	4.5	207	227	GGCCUGACCUGCGCCCAGUGC	Cleavage
ghy-miR168	c88664.graph_c0	Pheromone-processing carboxypeptidase kex1	4.5	108	128	CUCCGGACUUGUAAUAAGCAG	Cleavage
ghy-miR168	c9701.graph_c0	hypothetical protein	4.5	347	367	UUCUCCGCCUUCACCAAGCAC	Translation
ghy-miR168	c13645.graph_c0	hypothetical protein	5	5632	5655	GUUUUUGGCAAGAGGAGGGGUUCA	Cleavage
ghy-miR168	c24378.graph_c0	GABA permease	5	212	232	GUUCUGGUUUGCACUGAUCAA	Cleavage
ghy-miR168	c32513.graph_c0	Retrovirus-related Pol polyprotein from transposon RE2	5	329	349	AUCCUGGUUGGCAUCGGGCAA	Cleavage
ghy-miR168	c35078.graph_c0	Armadillo-like helical	5	1931	1951	UUCCCUAUUUUCGUCAGGCAA	Translation
ghy-miR168	c37547.graph_c0	ras-related protein RABA4d	5	411	431	UUCCUCAUUUGCAACAAGUGA	Cleavage
ghy-miR168	c40327.graph_c0	C2 and GRAM domain-containing protein	5	1356	1376	UUCUCGACUUUUGUUAAGUAA	Translation
ghy-miR168	c41087.graph_c0	anaphase-promoting complex subunit 7	5	424	444	UUCCUUGUCUGCAUCAAACAG	Cleavage
ghy-miR168	c41145.graph_c0	uncharacterized protein	5	964	984	UUUCCGAAUUGGACCAACCAA	Translation
ghy-miR168	c41949.graph_c0	alpha-mannosidase	5	1863	1886	UGACGUUAUAAGAAUUCCGGUUGU	Translation
ghy-miR168	c43184.graph_c0	Retrovirus-related Pol polyprotein from transposon RE2	5	125	148	UCUGGGCAUAACUUCUUUAAACUC	Cleavage
ghy-miR168	c43841.graph_c0	myosin-9	5	781	802	GCACUUUAUACAUUUAGAGAUG	Cleavage
ghy-miR168	c43860.graph_c0	dnaJ protein P58IPK homolog	5	485	505	UUUCUCAAUUGCAUCAAGCAC	Cleavage
ghy-miR168	c44404.graph_c0	transcription factor bHLH130-like	5	801	821	AUACCGAUCUGCACCGAGUUC	Cleavage
ghy-miR168	c44894.graph_c1	F-box/FBD/LRR-repeat protein	5	534	554	CUUCUGAUUUGCACCAAUUGG	Cleavage
ghy-miR168	c44903.graph_c1	ribonuclease II	5	2397	2417	UUUCUGAGCUACAGCAAGCAA	Translation
ghy-miR168	c46945.graph_c0	pre-mRNA-processing factor 39	5	2645	2665	UUCUCUACUUCCAUUAAGUAA	Translation
ghy-miR168	c47316.graph_c0	unnamed protein product	5	437	459	ACGCUUGUUAGCAUCUA-AGCAUC	Cleavage
ghy-miR168	c48403.graph_c0	hypothetical protein	5	516	536	CGGUGGCGGGUUUAGGGGAAA	Cleavage
ghy-miR168	c49349.graph_c2	uncharacterized protein	5	1892	1915	AUUUUGAUGAUAUGGCUGGUGGUG	Cleavage
ghy-miR168	c49364.graph_c0	cleavage and polyadenylation specificity factor subunit 3-I	5	426	446	UUCCCGACCGGCAUUUAGCAC	Cleavage
ghy-miR168	c49502.graph_c3	phytoene desaturase	5	2251	2271	UUUGUGGCCUGCAUCAGCCAA	Cleavage
ghy-miR168	c49684.graph_c0	dnaJ homolog subfamily C GRV2	5	2255	2275	AGCUUCAUAUAGGAAGACAUG	Cleavage
ghy-miR168	c50086.graph_c0	clathrin heavy chain 1-like	5	1795	1815	AUUCUGAUCUACUCCAAGCAG	Translation
ghy-miR168	c50088.graph_c0	pentatricopeptide repeat-containing protein	5	1474	1494	UUUCUUACAGGCACCAAGCAA	Cleavage
ghy-miR168	c50090.graph_c0	alpha-N-acetylglucosaminidase-like	5	3516	3539	CCAGUCUAUGGUCACAAAGGGUCA	Cleavage
ghy-miR168	c50480.graph_c0	uncharacterized protein	5	2560	2580	UUAUCGGCUUGCACCAGCCGA	Cleavage
ghy-miR168	c6682.graph_c0	RING/U-box superfamily protein	5	79	99	GUCUCGACUUGUAACAAGUUA	Cleavage
ghy-miR171a	c41019.graph_c0	scarecrow-like protein 6	0.5	1355	1375	GAUAUUGGCGCGGCUCAAUCA	Cleavage
ghy-miR171a	c42009.graph_c0	Transcription factor GRAS	0.5	26	46	GAUAUUGGCGCGGCUCAAUCA	Cleavage
ghy-miR171a	c44499.graph_c0	scarecrow-like protein 15	1	963	983	GAUAAUGGCACGGCUCAAUCA	Cleavage
ghy-miR171a	c46814.graph_c0	Glycine dehydrogenase	2	2122	2142	GAUGUUAUCCCUUCUGGGCUU	Cleavage
ghy-miR171a	c46477.graph_c1	hypothetical protein	2.5	808	828	CAUGUUGGCAUGGCUGAAUCA	Cleavage
ghy-miR171a	c24235.graph_c0	uncharacterized protein	3	386	406	CAUCCUAGCACGGCUCAAUCA	Cleavage
ghy-miR171a	c46391.graph_c0	WPP domain-associated protein	3	620	640	AUUGCUCUCUUUUUUUUGUUA	Cleavage
ghy-miR171a	c12548.graph_c0	hypothetical protein	3.5	1144	1164	GUUAUUAGCGCGGCUCAGCCA	Cleavage
ghy-miR171a	c40231.graph_c0	hypothetical protein	3.5	1030	1050	CUUCUUGGUGCGGCUCACUCA	Cleavage
ghy-miR171a	c43337.graph_c0	uncharacterized protein	3.5	1486	1506	UGUCUUGUCGUGGCUUAAUCA	Cleavage
ghy-miR171a	c44795.graph_c0	syntaxin-81	3.5	473	493	CUUCUAGGCAUGGCUCGAUUA	Cleavage
ghy-miR171a	c45866.graph_c0	receptor-like protein 7	3.5	2700	2720	CCUAUUGAUACGACUCAAUUA	Cleavage
ghy-miR171a	c47684.graph_c0	nephrocystin-3	3.5	197	217	UCGUGGAAUCAUCAGGAUUCA	Cleavage
ghy-miR171a	c47953.graph_c1	ABC transporter G family member 31	3.5	3437	3458	UAGAGUUUCUGUAAGCUUCAGA	Cleavage
ghy-miR171a	c49124.graph_c0	pentatricopeptide repeat-containing protein	3.5	925	945	AUGUUUGGCACGGCUUGAUUA	Cleavage
ghy-miR171a	c59006.graph_c0	hypothetical protein	3.5	103	123	GGUAUUGGUGCGGUUUUAUCA	Cleavage
ghy-miR171a	c15179.graph_c0	uncharacterized protein	4	111	131	CAUAUUGGCGCGCCUGAAUUA	Cleavage
ghy-miR171a	c25865.graph_c0	UDP-D-xylose:L-fucose alpha-1,3-D-xylosyltransferase MGP4-like	4	481	502	CAACGUUUUUUUCAUCUUCGGG	Translation
ghy-miR171a	c33888.graph_c0	uncharacterized protein	4	429	449	UGUUUUAGCAUGGUUCGAUUA	Cleavage
ghy-miR171a	c44408.graph_c0	hypothetical protein	4	1616	1636	ACUAUUGGCACGGUUUUAUGA	Cleavage
ghy-miR171a	c45403.graph_c1	hypothetical protein	4	866	886	UGAAUUGGUACGGUUCAAGUA	Cleavage
ghy-miR171a	c45642.graph_c4	unnamed protein product	4	610	630	AAGUCAAUGGAAUAGGUUUUG	Cleavage
ghy-miR171a	c46666.graph_c4	LRR receptor-like serine/threonine-protein kinase	4	1918	1937	GAU-UUGGCGCGGCUAAAUCA	Cleavage
ghy-miR171a	c47492.graph_c0	MDIS1-interacting receptor like kinase 2-like	4	1099	1119	UCUUCGAUUCCUUCUGAGCUU	Cleavage
ghy-miR171a	c48670.graph_c0	unnamed protein product	4	2259	2279	GAUUUUGGCAUGGCUAAGUUA	Cleavage
ghy-miR171a	c49450.graph_c0	MAG2-interacting protein 2	4	2050	2068	GCUAUUCCUGAGACUGUCC	Cleavage
ghy-miR171a	c49731.graph_c0	flavonoid 3'-monooxygenase-like	4	783	803	GGCGUUGGCACGGUUUGAUCU	Cleavage
ghy-miR171a	c50262.graph_c0	serine/threonine-protein phosphatase BSL1-like	4	2502	2522	GGCAUGGACGCGGUUCAAUCA	Cleavage
ghy-miR171a	c50296.graph_c0	uncharacterized protein	4	1056	1076	AAAAUCGGCACAGUUCAAUCA	Translation
ghy-miR171a	c50857.graph_c0	transcription factor E2FB	4	351	371	UGUGGUGGCAUGGCAUAAUCA	Cleavage
ghy-miR171a	c55409.graph_c0	phospholipase A(1) DAD1	4	73	93	GCUAUUGGCAUGGUUAAACCA	Cleavage
ghy-miR171a	c22780.graph_c0	uncharacterized protein	4.5	561	581	UGUGUUGCUAUGGAUCAGUCA	Cleavage
ghy-miR171a	c36669.graph_c0	hypothetical protein	4.5	420	440	GAAGUUGGCAUGCCUUAAUCG	Cleavage
ghy-miR171a	c37902.graph_c0	ERBB-3 BINDING PROTEIN 1	4.5	298	318	UCCAUUGGUACGGCUUCAUUG	Cleavage
ghy-miR171a	c39816.graph_c0	hypothetical protein	4.5	2089	2112	UUUUCAUAGUUAUCAGUUACAUUU	Cleavage
ghy-miR171a	c41373.graph_c0	unnamed protein product	4.5	2486	2506	CCUAUUGGCGUGUCUGGAUCA	Cleavage
ghy-miR171a	c41519.graph_c0	histone acetyltransferase MCC1	4.5	3273	3292	UAU-CUCACUUUCUUUUGCCA	Cleavage
ghy-miR171a	c41841.graph_c0	UDP-glycosyltransferase 83A1-like	4.5	758	778	CUGCUUAGCAUGGCUUGAUCA	Cleavage
ghy-miR171a	c43335.graph_c0	unnamed protein product	4.5	1388	1408	UGACGAUGAUCGAGUUGAUUU	Cleavage
ghy-miR171a	c46502.graph_c0	protein-tyrosine-phosphatase MKP1-like	4.5	5076	5096	GAUGAUGUUGCGGUUCAAUUA	Cleavage
ghy-miR171a	c46769.graph_c2	cytochrome b6-f complex iron-sulfur subunit	4.5	485	505	UAUGUUGCUAGGGUUCGAUCA	Translation
ghy-miR171a	c47481.graph_c0	NAC domain-containing protein 53	4.5	973	993	GUUGUUGGCUUGGUUCACUCA	Cleavage
ghy-miR171a	c47514.graph_c0	histidine kinase 1-like	4.5	1754	1774	GAUAUUAGCAAGGUUGAAUCA	Translation
ghy-miR171a	c49615.graph_c0	DNA gyrase subunit A	4.5	3914	3934	GAUAUUGAUGCGGCUUGAGCA	Cleavage
ghy-miR171a	c49720.graph_c0	uncharacterized protein	4.5	1863	1883	GAUGUUGGCGUAGCUCAAUUU	Translation
ghy-miR171a	c49972.graph_c0	ABC transporter C family member 10-like	4.5	4707	4727	GGUAUUUAUGCGGUUCGGUCA	Cleavage
ghy-miR171a	c50109.graph_c0	hypothetical protein	4.5	1623	1643	CAUAUUGCUGUGGCUCUAUUA	Cleavage
ghy-miR171a	c50366.graph_c1	hypothetical protein	4.5	1890	1910	GAGGUGGUGUUGGUGGUUUCG	Cleavage
ghy-miR171a	c64151.graph_c0	uncharacterized protein	4.5	106	126	AUUAUUGGUAUGGAUUGGUUA	Cleavage
ghy-miR171a	c70017.graph_c0	hypothetical protein	4.5	179	199	CGUAUUCGUUUGGCUCAAUUG	Cleavage
ghy-miR171a	c27511.graph_c0	ultraviolet-B receptor UVR8	5	466	486	CAUAUGGGCACUGCUUGAUUC	Translation
ghy-miR171a	c30694.graph_c0	hypothetical protein	5	696	716	GAUGCUGGUACGGCUUUGUCG	Cleavage
ghy-miR171a	c31829.graph_c0	hypothetical protein	5	781	801	AAUACUGGUACCGAUUAAUCA	Translation
ghy-miR171a	c33481.graph_c0	uncharacterized protein	5	428	448	GGGAUUGGUAUGGCUCUGUUG	Cleavage
ghy-miR171a	c33974.graph_c0	NF-Y protein	5	119	142	GUUAUGUUAGUCUUGGCAUUGUUU	Cleavage
ghy-miR171a	c34173.graph_c0	polyadenylate-binding protein-interacting protein 9-like	5	1474	1494	GAUAAUUGCAUUGCUCAAUUG	Translation
ghy-miR171a	c36309.graph_c0	uncharacterized protein	5	491	511	GGUAUUGGUGCCGCUUGACCA	Translation
ghy-miR171a	c39969.graph_c0	unc-13 homolog	5	1435	1455	GACAUUGGCUCGGCUUGAUUC	Cleavage
ghy-miR171a	c43930.graph_c0	uncharacterized protein	5	348	368	GAAGUUGGCAUGGUUCAAUGU	Cleavage
ghy-miR171a	c43967.graph_c0	DNA primase small subunit	5	1529	1549	UAUGUUGCUACGUUUUAAUUA	Cleavage
ghy-miR171a	c44067.graph_c5	uncharacterized protein	5	916	936	CAUAUUUGUAUGGAUGAAUCA	Cleavage
ghy-miR171a	c45636.graph_c0	uncharacterized protein	5	534	554	AAUCUUGCAGGGGUUUAUCAG	Cleavage
ghy-miR171a	c47731.graph_c0	leucine--tRNA ligase	5	1543	1563	GAUAUUGGAAUGGUUUCAUUA	Cleavage
ghy-miR171a	c48105.graph_c0	ABIL3-like protein	5	2026	2046	GAUAUUUAUAUGGUUCAAUAA	Cleavage
ghy-miR171a	c48239.graph_c3	unnamed protein product	5	2140	2159	GGUAUUAGCAUG-CUUAAUCA	Cleavage
ghy-miR171a	c48722.graph_c1	unnamed protein product	5	648	671	UAAUUUUUAUUGGUACGGUUAAGU	Translation
ghy-miR171a	c48889.graph_c0	Cupredoxin	5	1595	1615	GAGCGUAAAUAGUAGGUCCUG	Cleavage
ghy-miR171a	c49844.graph_c0	RNA-binding protein 1-like	5	4724	4743	GAUAUUGGUUCGGCUCA-UCA	Cleavage
ghy-miR171a	c74146.graph_c0	uncharacterized protein	5	172	192	GGUAUUGAGGUGGCUCGAUCU	Cleavage
ghy-miR171b	c41019.graph_c0	scarecrow-like protein 6	0.5	1355	1375	GAUAUUGGCGCGGCUCAAUCA	Cleavage
ghy-miR171b	c42009.graph_c0	Transcription factor GRAS	0.5	26	46	GAUAUUGGCGCGGCUCAAUCA	Cleavage
ghy-miR171b	c44499.graph_c0	scarecrow-like protein 15	1	963	983	GAUAAUGGCACGGCUCAAUCA	Cleavage
ghy-miR171b	c46814.graph_c0	Glycine dehydrogenase	2	2122	2142	GAUGUUAUCCCUUCUGGGCUU	Cleavage
ghy-miR171b	c46477.graph_c1	hypothetical protein	2.5	808	828	CAUGUUGGCAUGGCUGAAUCA	Cleavage
ghy-miR171b	c24235.graph_c0	uncharacterized protein	3	386	406	CAUCCUAGCACGGCUCAAUCA	Cleavage
ghy-miR171b	c46391.graph_c0	WPP domain-associated protein	3	620	640	AUUGCUCUCUUUUUUUUGUUA	Cleavage
ghy-miR171b	c12548.graph_c0	hypothetical protein	3.5	1144	1164	GUUAUUAGCGCGGCUCAGCCA	Cleavage
ghy-miR171b	c40231.graph_c0	hypothetical protein	3.5	1030	1050	CUUCUUGGUGCGGCUCACUCA	Cleavage
ghy-miR171b	c43337.graph_c0	uncharacterized protein	3.5	1486	1506	UGUCUUGUCGUGGCUUAAUCA	Cleavage
ghy-miR171b	c44795.graph_c0	syntaxin-81	3.5	473	493	CUUCUAGGCAUGGCUCGAUUA	Cleavage
ghy-miR171b	c45866.graph_c0	receptor-like protein 7	3.5	2700	2720	CCUAUUGAUACGACUCAAUUA	Cleavage
ghy-miR171b	c47684.graph_c0	nephrocystin-3	3.5	197	217	UCGUGGAAUCAUCAGGAUUCA	Cleavage
ghy-miR171b	c47953.graph_c1	ABC transporter G family member 31	3.5	3437	3458	UAGAGUUUCUGUAAGCUUCAGA	Cleavage
ghy-miR171b	c49124.graph_c0	pentatricopeptide repeat-containing protein	3.5	925	945	AUGUUUGGCACGGCUUGAUUA	Cleavage
ghy-miR171b	c59006.graph_c0	hypothetical protein	3.5	103	123	GGUAUUGGUGCGGUUUUAUCA	Cleavage
ghy-miR171b	c15179.graph_c0	uncharacterized protein	4	111	131	CAUAUUGGCGCGCCUGAAUUA	Cleavage
ghy-miR171b	c25865.graph_c0	UDP-D-xylose:L-fucose alpha-1,3-D-xylosyltransferase MGP4-like	4	481	502	CAACGUUUUUUUCAUCUUCGGG	Translation
ghy-miR171b	c33888.graph_c0	uncharacterized protein	4	429	449	UGUUUUAGCAUGGUUCGAUUA	Cleavage
ghy-miR171b	c44408.graph_c0	hypothetical protein	4	1616	1636	ACUAUUGGCACGGUUUUAUGA	Cleavage
ghy-miR171b	c45403.graph_c1	hypothetical protein	4	866	886	UGAAUUGGUACGGUUCAAGUA	Cleavage
ghy-miR171b	c45642.graph_c4	unnamed protein product	4	610	630	AAGUCAAUGGAAUAGGUUUUG	Cleavage
ghy-miR171b	c46666.graph_c4	LRR receptor-like serine/threonine-protein kinase	4	1918	1937	GAU-UUGGCGCGGCUAAAUCA	Cleavage
ghy-miR171b	c47492.graph_c0	MDIS1-interacting receptor like kinase 2-like	4	1099	1119	UCUUCGAUUCCUUCUGAGCUU	Cleavage
ghy-miR171b	c48670.graph_c0	unnamed protein product	4	2259	2279	GAUUUUGGCAUGGCUAAGUUA	Cleavage
ghy-miR171b	c49450.graph_c0	MAG2-interacting protein 2	4	2050	2068	GCUAUUCCUGAGACUGUCC	Cleavage
ghy-miR171b	c49731.graph_c0	flavonoid 3'-monooxygenase-like	4	783	803	GGCGUUGGCACGGUUUGAUCU	Cleavage
ghy-miR171b	c50262.graph_c0	serine/threonine-protein phosphatase BSL1-like	4	2502	2522	GGCAUGGACGCGGUUCAAUCA	Cleavage
ghy-miR171b	c50296.graph_c0	uncharacterized protein	4	1056	1076	AAAAUCGGCACAGUUCAAUCA	Translation
ghy-miR171b	c50857.graph_c0	transcription factor E2FB	4	351	371	UGUGGUGGCAUGGCAUAAUCA	Cleavage
ghy-miR171b	c55409.graph_c0	phospholipase A(1) DAD1	4	73	93	GCUAUUGGCAUGGUUAAACCA	Cleavage
ghy-miR171b	c22780.graph_c0	uncharacterized protein	4.5	561	581	UGUGUUGCUAUGGAUCAGUCA	Cleavage
ghy-miR171b	c36669.graph_c0	hypothetical protein	4.5	420	440	GAAGUUGGCAUGCCUUAAUCG	Cleavage
ghy-miR171b	c37902.graph_c0	ERBB-3 BINDING PROTEIN 1	4.5	298	318	UCCAUUGGUACGGCUUCAUUG	Cleavage
ghy-miR171b	c39816.graph_c0	hypothetical protein	4.5	2089	2112	UUUUCAUAGUUAUCAGUUACAUUU	Cleavage
ghy-miR171b	c41373.graph_c0	unnamed protein product	4.5	2486	2506	CCUAUUGGCGUGUCUGGAUCA	Cleavage
ghy-miR171b	c41519.graph_c0	histone acetyltransferase MCC1	4.5	3273	3292	UAU-CUCACUUUCUUUUGCCA	Cleavage
ghy-miR171b	c41841.graph_c0	UDP-glycosyltransferase 83A1-like	4.5	758	778	CUGCUUAGCAUGGCUUGAUCA	Cleavage
ghy-miR171b	c43335.graph_c0	unnamed protein product	4.5	1388	1408	UGACGAUGAUCGAGUUGAUUU	Cleavage
ghy-miR171b	c46502.graph_c0	protein-tyrosine-phosphatase MKP1-like	4.5	5076	5096	GAUGAUGUUGCGGUUCAAUUA	Cleavage
ghy-miR171b	c46769.graph_c2	cytochrome b6-f complex iron-sulfur subunit	4.5	485	505	UAUGUUGCUAGGGUUCGAUCA	Translation
ghy-miR171b	c47481.graph_c0	NAC domain-containing protein 53	4.5	973	993	GUUGUUGGCUUGGUUCACUCA	Cleavage
ghy-miR171b	c47514.graph_c0	histidine kinase 1-like	4.5	1754	1774	GAUAUUAGCAAGGUUGAAUCA	Translation
ghy-miR171b	c49615.graph_c0	DNA gyrase subunit A	4.5	3914	3934	GAUAUUGAUGCGGCUUGAGCA	Cleavage
ghy-miR171b	c49720.graph_c0	uncharacterized protein	4.5	1863	1883	GAUGUUGGCGUAGCUCAAUUU	Translation
ghy-miR171b	c49972.graph_c0	ABC transporter C family member 10-like	4.5	4707	4727	GGUAUUUAUGCGGUUCGGUCA	Cleavage
ghy-miR171b	c50109.graph_c0	hypothetical protein	4.5	1623	1643	CAUAUUGCUGUGGCUCUAUUA	Cleavage
ghy-miR171b	c50366.graph_c1	hypothetical protein	4.5	1890	1910	GAGGUGGUGUUGGUGGUUUCG	Cleavage
ghy-miR171b	c64151.graph_c0	uncharacterized protein	4.5	106	126	AUUAUUGGUAUGGAUUGGUUA	Cleavage
ghy-miR171b	c70017.graph_c0	hypothetical protein	4.5	179	199	CGUAUUCGUUUGGCUCAAUUG	Cleavage
ghy-miR171b	c27511.graph_c0	ultraviolet-B receptor UVR8	5	466	486	CAUAUGGGCACUGCUUGAUUC	Translation
ghy-miR171b	c30694.graph_c0	hypothetical protein	5	696	716	GAUGCUGGUACGGCUUUGUCG	Cleavage
ghy-miR171b	c31829.graph_c0	hypothetical protein	5	781	801	AAUACUGGUACCGAUUAAUCA	Translation
ghy-miR171b	c33481.graph_c0	uncharacterized protein	5	428	448	GGGAUUGGUAUGGCUCUGUUG	Cleavage
ghy-miR171b	c33974.graph_c0	NF-Y protein	5	119	142	GUUAUGUUAGUCUUGGCAUUGUUU	Cleavage
ghy-miR171b	c34173.graph_c0	polyadenylate-binding protein-interacting protein 9-like	5	1474	1494	GAUAAUUGCAUUGCUCAAUUG	Translation
ghy-miR171b	c36309.graph_c0	uncharacterized protein	5	491	511	GGUAUUGGUGCCGCUUGACCA	Translation
ghy-miR171b	c39969.graph_c0	unc-13 homolog	5	1435	1455	GACAUUGGCUCGGCUUGAUUC	Cleavage
ghy-miR171b	c43930.graph_c0	uncharacterized protein	5	348	368	GAAGUUGGCAUGGUUCAAUGU	Cleavage
ghy-miR171b	c43967.graph_c0	DNA primase small subunit	5	1529	1549	UAUGUUGCUACGUUUUAAUUA	Cleavage
ghy-miR171b	c44067.graph_c5	uncharacterized protein	5	916	936	CAUAUUUGUAUGGAUGAAUCA	Cleavage
ghy-miR171b	c45636.graph_c0	uncharacterized protein	5	534	554	AAUCUUGCAGGGGUUUAUCAG	Cleavage
ghy-miR171b	c47731.graph_c0	leucine--tRNA ligase	5	1543	1563	GAUAUUGGAAUGGUUUCAUUA	Cleavage
ghy-miR171b	c48105.graph_c0	ABIL3-like protein	5	2026	2046	GAUAUUUAUAUGGUUCAAUAA	Cleavage
ghy-miR171b	c48239.graph_c3	unnamed protein product	5	2140	2159	GGUAUUAGCAUG-CUUAAUCA	Cleavage
ghy-miR171b	c48722.graph_c1	unnamed protein product	5	648	671	UAAUUUUUAUUGGUACGGUUAAGU	Translation
ghy-miR171b	c48889.graph_c0	Cupredoxin	5	1595	1615	GAGCGUAAAUAGUAGGUCCUG	Cleavage
ghy-miR171b	c49844.graph_c0	RNA-binding protein 1-like	5	4724	4743	GAUAUUGGUUCGGCUCA-UCA	Cleavage
ghy-miR171b	c74146.graph_c0	uncharacterized protein	5	172	192	GGUAUUGAGGUGGCUCGAUCU	Cleavage
ghy-miR172	c16574.graph_c0	ethylene-responsive transcription factor RAP2-7-like	0.5	649	669	CCGCAGCAUCAUCAGGAUUCU	Cleavage
ghy-miR172	c38598.graph_c0	hypothetical protein	1.5	459	479	CUGCAGCAUCAUCAGGAUUCC	Cleavage
ghy-miR172	c49192.graph_c1	unnamed protein product	1.5	2166	2186	CUGCAGCAUCAUCAGGAUUCC	Cleavage
ghy-miR172	c48738.graph_c0	unnamed protein product	2	88	108	CAUCAUCAUCAUCAAGAUUCU	Cleavage
ghy-miR172	c37120.graph_c0	DNA-directed RNA polymerase IV subunit 1	2.5	2309	2329	GUGGAGGAUCAUCAAGAUUUU	Cleavage
ghy-miR172	c39715.graph_c0	uncharacterized protein	2.5	1467	1487	CAGUAGUAUCUUCAAGAUUCU	Translation
ghy-miR172	c46761.graph_c0	alkylated DNA repair protein ALKBH8 homolog	2.5	779	799	CUGCAGCCUCAUCAAGCUUCU	Cleavage
ghy-miR172	c49927.graph_c1	uncharacterized protein	2.5	1966	1986	UAGGAGCAUCUUCAAGAUUCU	Translation
ghy-miR172	c37161.graph_c0	hypothetical protein	3	1399	1419	AACCAGCAUUAUCAAGAAUCU	Cleavage
ghy-miR172	c40070.graph_c0	leucine-rich repeat extensin-like protein 3	3	448	468	AGCCAUCAUCAUCAAGAUUCC	Cleavage
ghy-miR172	c40544.graph_c0	uncharacterized protein	3	1974	1994	UUAGAGCAUCGUCGAGAUUCU	Cleavage
ghy-miR172	c42211.graph_c0	uncharacterized conserved protein	3	554	574	AUGUAGGAUCAUCAGGAUUCA	Cleavage
ghy-miR172	c47212.graph_c0	pentatricopeptide repeat-containing protein	3	1642	1662	ACGUGCCAUCAUCAAGAUUCA	Cleavage
ghy-miR172	c49986.graph_c0	endoribonuclease Dicer homolog 3a	3	3049	3069	UCGCACCAUUAUCAAGUUUCU	Cleavage
ghy-miR172	c10887.graph_c0	LINE-1 retrotransposable element ORF2 protein	3.5	362	382	CUGCAACCUCAUCAAGAUUUG	Cleavage
ghy-miR172	c30156.graph_c0	uncharacterized protein	3.5	409	429	AGUCAUUAUCAUUAAGAUUUU	Cleavage
ghy-miR172	c30380.graph_c0	beta-glucosidase 4	3.5	1221	1241	AGGCAGCAUCAUCAUGGCUCU	Cleavage
ghy-miR172	c34564.graph_c0	hypothetical protein	3.5	515	535	UAACAGCAUCAUCAAGAAUCA	Cleavage
ghy-miR172	c38708.graph_c1	hypothetical protein	3.5	1330	1349	CUGCA-CAUCAUCAAGAGUCU	Cleavage
ghy-miR172	c40761.graph_c0	unnamed protein product	3.5	753	773	CAGCAGUACUAUUAAGAUUUU	Cleavage
ghy-miR172	c41615.graph_c1	polyadenylate-binding protein 2-like	3.5	1699	1719	UAGCAGCAUCCUCAGCAUUCU	Translation
ghy-miR172	c41998.graph_c0	GATA transcription factor 24-like	3.5	318	338	CAGCAUCAUCAUCAAGCUUCG	Cleavage
ghy-miR172	c43171.graph_c0	uncharacterized protein	3.5	861	881	AUGGGAUAUCGUCAAGAUUCU	Cleavage
ghy-miR172	c44467.graph_c0	ENHANCED DISEASE RESISTANCE 2-like	3.5	1230	1250	UUGCAGCAUUAUCAAGAGACU	Cleavage
ghy-miR172	c45647.graph_c0	DEAD-box ATP-dependent RNA helicase 36	3.5	1323	1343	CGGCAGGAAUAUCAGGAUUCU	Cleavage
ghy-miR172	c46688.graph_c0	ABC transporter A family member 7-like	3.5	1759	1779	AUGCAUCUUCAUCAUGAUUCU	Cleavage
ghy-miR172	c47372.graph_c0	Armadillo	3.5	1592	1612	AAACGGCAUUAUCGAGGUUUU	Cleavage
ghy-miR172	c47377.graph_c0	uncharacterized protein	3.5	1654	1674	UAGUAGCAUCAUCAACAUUGU	Cleavage
ghy-miR172	c47484.graph_c0	hypothetical protein	3.5	2904	2924	CCUCACCAUCAUCAGGAUUCA	Cleavage
ghy-miR172	c47684.graph_c0	nephrocystin-3	3.5	197	217	UCGUGGAAUCAUCAGGAUUCA	Cleavage
ghy-miR172	c48758.graph_c0	UDP-sugar pyrophosphorylase-like	3.5	1710	1730	UUGCAGCCUCGUCAGGAUUGU	Cleavage
ghy-miR172	c49302.graph_c1	hypothetical protein	3.5	1350	1369	AUGCAGC-UCAUCAAAAUUCU	Cleavage
ghy-miR172	c49582.graph_c0	pentatricopeptide repeat-containing protein	3.5	1775	1795	AGAUAGAAUCAUCAAGGUUUU	Cleavage
ghy-miR172	c50069.graph_c0	ABC transporter C family member 13	3.5	3651	3671	AUACACUAUCGUUAAGAUUCU	Cleavage
ghy-miR172	c50227.graph_c0	zinc finger BED domain-containing protein RICESLEEPER 2-like	3.5	2146	2166	CAGCAGUGUUAUCAACAUUUU	Cleavage
ghy-miR172	c91444.graph_c0	2-dehydro-3-deoxyphosphoheptonate aldolase	3.5	155	175	GGUUAACAUCAUUGAGAUUCU	Cleavage
ghy-miR172	c25274.graph_c0	protein phosphatase 2C (PP2C)-like protein	4	1300	1320	AAAUCCCAUCAUCAAGAUUCU	Cleavage
ghy-miR172	c29882.graph_c0	unnamed protein product	4	1069	1089	AUUCAGCUUCGUUGAGGUUCU	Cleavage
ghy-miR172	c32104.graph_c0	lysine-specific demethylase JMJ25	4	639	659	UCAAAGCAUCGUCAAGAUCCU	Cleavage
ghy-miR172	c32966.graph_c0	putative UPF0481 protein	4	948	968	AUGCUCAGUCAUCAAGAUUUU	Cleavage
ghy-miR172	c33784.graph_c0	Tat binding protein 1-interacting	4	881	901	GUCCAGCAUCAGCAAGAUUAU	Translation
ghy-miR172	c35805.graph_c0	unnamed protein product	4	690	710	UCUCAGCAUUAAUAAGGUUCU	Translation
ghy-miR172	c36198.graph_c0	beta-D-xylosidase 7	4	842	862	AAAUGGCAUUAACAAGAUUCU	Translation
ghy-miR172	c37091.graph_c0	unnamed protein product	4	535	555	UAGCAGCAUCCUCAAGAUUAG	Translation
ghy-miR172	c37915.graph_c0	hypothetical protein	4	63	83	CUUCAGCAUCAUCGAGAUGCA	Cleavage
ghy-miR172	c38230.graph_c0	protein of unknown function	4	2594	2614	UAACAGCAUCAUUAAGCUUCA	Cleavage
ghy-miR172	c38230.graph_c0	protein of unknown function	4	2594	2614	UAACAGCAUCAUUAAGCUUCA	Cleavage
ghy-miR172	c39495.graph_c0	G-protein beta WD-40 repeat-containing protein	4	690	710	CUGCAUUAUCAUCGAGAAUUU	Cleavage
ghy-miR172	c42093.graph_c0	uncharacterized protein	4	674	694	ACUUUGCAUUAUUAAGAUUCU	Cleavage
ghy-miR172	c42577.graph_c0	microtubule-associated protein futsch-like	4	478	498	GCCAUGAAUCAUCAAGAUUCU	Cleavage
ghy-miR172	c43110.graph_c0	uncharacterized protein	4	1979	1999	CUGCAGUAUAAUCAAGGUUUG	Cleavage
ghy-miR172	c44595.graph_c0	uncharacterized protein	4	940	960	UGCCAGCAUCUUCGGGAUUUU	Translation
ghy-miR172	c45865.graph_c0	protein kinase PVPK-1	4	1212	1232	CUGCAUCAUUAUUAGGGUUCA	Cleavage
ghy-miR172	c46450.graph_c0	pentatricopeptide repeat-containing protein	4	450	470	CUUUAUCGUCAUCAAGAUUCA	Cleavage
ghy-miR172	c47443.graph_c0	dihydrolipoyllysine-residue acetyltransferase component 1 of pyruvate dehydrogenase complex	4	1305	1325	CAUCAGCAUCAUCAGGAAUCG	Cleavage
ghy-miR172	c48800.graph_c0	pentatricopeptide repeat-containing protein	4	2068	2088	CUUGAGCAUCAUUAGGGUUUU	Cleavage
ghy-miR172	c48948.graph_c0	calcium-transporting ATPase 2, plasma membrane-type-like	4	2630	2650	CCGGCUCACUCUCUCCUAUCA	Cleavage
ghy-miR172	c49676.graph_c1	malonate--CoA ligase	4	2166	2186	UUCUAGCACCAUUGAGAUUCU	Cleavage
ghy-miR172	c49716.graph_c0	LRR receptor-like serine/threonine-protein kinase	4	2884	2904	AUUCUGCAUCAUUAGGGUUUU	Cleavage
ghy-miR172	c49851.graph_c0	lysine-specific histone demethylase 1 homolog 3	4	1220	1240	AUUCAGGAACAUCAAGAUUUU	Cleavage
ghy-miR172	c49878.graph_c1	nucleotidyltransferase, Ribonuclease H	4	3530	3550	UAAUGGCAUCAUCAAGGUUUG	Cleavage
ghy-miR172	c49975.graph_c0	hypothetical protein	4	1575	1595	GGAUAGUAUCAUCGAGAAUCU	Cleavage
ghy-miR172	c50156.graph_c0	pol polyprotein	4	1748	1768	CUCCAGUGUCAACAAGAUUUU	Translation
ghy-miR172	c50161.graph_c0	uncharacterized protein	4	2047	2067	UCGCGGCAUCGUCAACGUUCC	Cleavage
ghy-miR172	c50316.graph_c0	histone H3.v1-like	4	1931	1951	CUGCAGCAUCAGCAGAAUUUU	Translation
ghy-miR172	c50833.graph_c0	unnamed protein product	4	214	233	AUUUGGC-UCAUCAAGAUUCU	Cleavage
ghy-miR172	c11633.graph_c0	oxysterol-binding protein-related protein 2B-like	4.5	72	93	ACGCAGCAACAUUCAAGAUUCU	Cleavage
ghy-miR172	c14064.graph_c0	non-specific lipid-transfer protein-like	4.5	435	455	UUGCGGCAUUAUUGAGUUUCG	Cleavage
ghy-miR172	c23571.graph_c0	A-kinase anchor protein 17B	4.5	450	470	CUUUAGCAACGUCAAGAUUCC	Cleavage
ghy-miR172	c33778.graph_c0	UDP-N-acetylglucosamine--peptide N-acetylglucosaminyltransferase SEC	4.5	326	345	AUCCAGCA-CAUCAAGAUUUU	Cleavage
ghy-miR172	c34333.graph_c0	formin-like protein 3	4.5	3125	3145	GUGAAGCAUGAUCAAGAGUUU	Cleavage
ghy-miR172	c34333.graph_c0	formin-like protein 3	4.5	3125	3145	GUGAAGCAUGAUCAAGAGUUU	Cleavage
ghy-miR172	c36614.graph_c0	casein kinase II subunit alpha-like	4.5	177	197	GAAGUGCAUAAUCAAGAUUCU	Cleavage
ghy-miR172	c38417.graph_c0	elongator complex protein 3	4.5	1202	1222	ACAAAGCAUCAUGAAGAUUCC	Cleavage
ghy-miR172	c38854.graph_c0	casein kinase II subunit alpha-2	4.5	332	352	GAAGUGUGUUAUCAAGAUUCU	Cleavage
ghy-miR172	c40006.graph_c0	uncharacterized protein	4.5	671	691	AUGUAUCAUCAUCAUCAUUCU	Cleavage
ghy-miR172	c40372.graph_c0	hypothetical protein	4.5	553	573	UUGUAGCAUCAAUUAGAUUUU	Translation
ghy-miR172	c41229.graph_c0	U-box domain-containing protein 21	4.5	277	297	ACAAGGUGUCAUCAAGAUUCG	Cleavage
ghy-miR172	c41784.graph_c0	IQ domain-containing protein IQM2	4.5	509	529	ACACAGAAUCAUCAAGAUUGG	Cleavage
ghy-miR172	c41985.graph_c0	YEATS-like protein	4.5	400	420	AUCUAGCAUCAUCGGAAUUUU	Cleavage
ghy-miR172	c43098.graph_c0	B3 domain-containing protein	4.5	16	36	AUGUAUUUUCAUUAAGGUUUU	Cleavage
ghy-miR172	c43481.graph_c1	hypothetical protein	4.5	507	527	CCAGUGCAUCAUCAAGAUUAU	Cleavage
ghy-miR172	c45059.graph_c0	nitrate regulatory gene2 protein-like	4.5	2146	2167	AGGUGGCAUUAUCAAGGAUUCU	Cleavage
ghy-miR172	c46043.graph_c1	uncharacterized protein	4.5	2119	2138	UUGCAGCAUUAUCG-GAUUUU	Cleavage
ghy-miR172	c46283.graph_c0	reverse transcriptase domain-containing protein	4.5	528	550	UUGCAGACUAUCAUCGAGGUUUU	Cleavage
ghy-miR172	c47487.graph_c0	pentatricopeptide repeat-containing protein	4.5	924	944	AUGCUUCGUUAUCAAGAUUAU	Cleavage
ghy-miR172	c48067.graph_c0	suppressor of white apricot	4.5	51	72	AUGCACGAAUUAUCAAGGUUUU	Cleavage
ghy-miR172	c48511.graph_c0	AP-2 complex subunit sigma	4.5	1396	1416	AUGCAAUUUUAUUAAGGUUUU	Cleavage
ghy-miR172	c48821.graph_c0	KRR1 small subunit processome component	4.5	1099	1119	GUGUGACAUCAUCAAGAUUGG	Cleavage
ghy-miR172	c49274.graph_c0	carbon catabolite repressor protein 4 homolog 5	4.5	875	894	UUGUAGCAUC-UCGAGAUUUU	Translation
ghy-miR172	c49414.graph_c0	receptor-like protein kinase	4.5	1507	1527	UUGCAAUAUCUUCAAGAUUUC	Translation
ghy-miR172	c58524.graph_c0	hypothetical protein	4.5	102	122	CUGAAGCAUCAUUGAGAUGCA	Cleavage
ghy-miR172	c82416.graph_c0	magnesium transporter MRS2-3-like	4.5	116	136	CCUGGGCAUUAUCAAUAUUCU	Cleavage
ghy-miR172	c19130.graph_c0	transducin beta-like protein 2	5	1199	1219	AUGAAGCACCAGUAAGAUUUU	Translation
ghy-miR172	c26009.graph_c0	Protein kinase, ATP binding site-containing protein	5	942	963	AUGCAGACAUGGUCAAGAUUCG	Cleavage
ghy-miR172	c27020.graph_c0	Ubiquitin carboxyl-terminal hydrolase family protein	5	567	587	AUGUUGUAGCAACAAGAUUCU	Translation
ghy-miR172	c31496.graph_c0	uncharacterized protein	5	956	976	AUGUAGCGUUGUCGGGCUUUU	Cleavage
ghy-miR172	c38316.graph_c0	RNA-directed DNA polymerase	5	1624	1645	CUGCAUCAGUCAUUAGGAUUCU	Cleavage
ghy-miR172	c39272.graph_c0	abnormal spindle-like microcephaly-associated protein homolog	5	2638	2658	GUUCAAUAUCAUCAAGAUUGA	Cleavage
ghy-miR172	c40649.graph_c0	unnamed protein product	5	1772	1792	AUGCAGCUUCUUUAAAAUUUU	Translation
ghy-miR172	c41606.graph_c1	Molybdenum cofactor biosynthesis, MoeB	5	474	494	CUGUAGCGUCAUUAGGAGUUG	Cleavage
ghy-miR172	c43598.graph_c0	transcription factor DIVARICATA-like	5	410	430	UUGUAGGGUCAUUAAGAUUGA	Cleavage
ghy-miR172	c43922.graph_c0	uncharacterized protein	5	36	56	UUUCGGUGUCAUCAAGAUUAG	Cleavage
ghy-miR172	c45870.graph_c0	type IV inositol polyphosphate 5-phosphatase 7	5	1626	1648	AUGUAACCAAUCAUCAAGAUUCA	Cleavage
ghy-miR172	c45971.graph_c0	telomere repeat-binding factor 4-like	5	774	794	AUCCAGUGUUAUUAAAAUUUU	Cleavage
ghy-miR172	c46884.graph_c0	zinc finger CCCH domain-containing protein 19-like	5	2829	2849	AUGUGGCAUUAUAAGGAUCCU	Cleavage
ghy-miR172	c47493.graph_c1	MICRORCHIDIA 6-like protein	5	2874	2895	CUGCAGUAUCCAUCAAGAUUGU	Translation
ghy-miR172	c48203.graph_c0	uncharacterized protein	5	897	917	UCUCAGCAUCAUCAAGAUAUC	Cleavage
ghy-miR172	c48332.graph_c0	TSL-kinase interacting protein 1-like	5	2085	2105	GUGUGGCAUUGUCAACAUUUG	Cleavage
ghy-miR172	c48743.graph_c2	boron transporter 2	5	534	554	AUUCAGCAGCAUCGAGAUCUU	Cleavage
ghy-miR172	c50275.graph_c0	Disease resistance protein	5	4893	4913	GUGUAGUAUGGUUGGGAUUUU	Cleavage
ghy-miR172	c50455.graph_c0	hypothetical protein	5	4379	4399	CUUCAGCAUGAUCAAGAUUAA	Cleavage
ghy-miR319	c10991.graph_c0	putative retrotransposon protein	2.5	325	345	GAGGGGAUCCCUUCAGUUCAG	Cleavage
ghy-miR319	c10991.graph_c0	putative retrotransposon protein	2.5	325	345	GAGGGGAUCCCUUCAGUUCAG	Cleavage
ghy-miR319	c43113.graph_c0	heat stress transcription factor A-8-like	3	1	24	CUUAACCAUAUUAUGUCACAUCAU	Cleavage
ghy-miR319	c46412.graph_c0	ABC transporter C family member 2-like	3	755	775	AACCUGACCAGCAUCAAGCAG	Cleavage
ghy-miR319	c47452.graph_c0	auxilin-related protein 2	3	3049	3069	GAGGAGCUCUUUUAAGUUCAA	Cleavage
ghy-miR319	c50038.graph_c0	Retrovirus-related Pol polyprotein from transposon TNT 1-94	3	206	229	UCAUCUGUCAAAAUCAUCAUCGUU	Cleavage
ghy-miR319	c16103.graph_c0	transcription initiation factor TFIID subunit 7	3.5	125	145	ACGGUGCUUCUUUCAGUUUGA	Cleavage
ghy-miR319	c25058.graph_c0	uncharacterized protein	3.5	1381	1404	GGCUUUCACUGCUUUGGCAGUCUU	Cleavage
ghy-miR319	c35761.graph_c0	leucine-rich repeat transmembrane protein kinase	3.5	4119	4139	AUGAACAAUAAACUUUUUUGU	Translation
ghy-miR319	c40349.graph_c0	hypothetical protein	3.5	1263	1283	CAGGAGAACCCUUCAAUCCAA	Cleavage
ghy-miR319	c42806.graph_c0	chromo domain protein LHP1-like	3.5	761	781	UUAAAGCUCCUUUUAGUUCAA	Cleavage
ghy-miR319	c43939.graph_c0	autophagy-related protein 18g	3.5	2992	3013	AUGUAUGUUUAUGGUAUUUCAA	Cleavage
ghy-miR319	c44771.graph_c0	HUA2-LIKE 2-like protein	3.5	4499	4523	AUUGAUCAAAGCCAUGAGAUCAUUU	Cleavage
ghy-miR319	c48452.graph_c2	stearoyl-acyl-carrier protein desaturase	3.5	721	741	UAGGGGCUGUUUUCAGUCCGA	Cleavage
ghy-miR319	c67407.graph_c0	hypothetical protein	3.5	53	73	AGGGAGCUCUUUUUGGUACAA	Cleavage
ghy-miR319	c9804.graph_c0	RNA-directed DNA polymerase	3.5	102	122	GGGGGGCUUGCUUCAGUCCAU	Cleavage
ghy-miR319	c25653.graph_c0	serine/threonine-protein kinase	4	207	227	AAUGGGCUGUUUUCAGUCCAA	Cleavage
ghy-miR319	c29439.graph_c0	unnamed protein product	4	46	66	AGUAAGCUCACUUCAGUUCAA	Cleavage
ghy-miR319	c31592.graph_c1	protochlorophyllide oxidoreductase	4	8	28	CCGGAGCUUCCUCCGGUCUGG	Cleavage
ghy-miR319	c35616.graph_c0	uncharacterized protein	4	144	164	CUGGAAUUCCUUUUAGUGCAA	Cleavage
ghy-miR319	c36688.graph_c0	MACPF domain-containing protein	4	13	33	AUGGAUUUUCUUUUAGUUCAG	Cleavage
ghy-miR319	c36988.graph_c0	uncharacterized protein	4	1841	1861	UAGGAGUUCUCUUCAGUAAAA	Cleavage
ghy-miR319	c40216.graph_c0	boron transporter	4	1318	1338	CGCGACGUCUCUUUAGUCCAA	Cleavage
ghy-miR319	c40827.graph_c0	E3 ubiquitin-protein ligase	4	24	44	AUGGGGUCACUUUCAGUCCAA	Cleavage
ghy-miR319	c41431.graph_c0	CSC1-like protein RXW8	4	538	558	UGGCGGCUCUUUUCAUUCCAA	Cleavage
ghy-miR319	c41901.graph_c0	GRAVITROPIC IN THE LIGHT 1-like	4	645	665	CACGAGGUCUCUUUGGUUCAA	Cleavage
ghy-miR319	c42048.graph_c1	tRNA (guanine(10)-N2)-methyltransferase homolog	4	1556	1576	UUCGGGCUUCCUGUAGUCCAA	Cleavage
ghy-miR319	c42607.graph_c0	PELPK1-like protein	4	52	72	CGGAAAUUCUCUUCGGUUCAA	Cleavage
ghy-miR319	c42634.graph_c0	methyl-CpG-binding domain-containing protein 9	4	4078	4098	UGGAAUAUUGGGAGUUAGGCA	Cleavage
ghy-miR319	c44859.graph_c0	urease accessory protein G	4	1375	1395	AGGAACCUUCAUUCAGUCCAA	Translation
ghy-miR319	c45095.graph_c1	NAP1-related protein 1-like	4	431	451	UCCGGGCUUUCUUCAAUCCAA	Cleavage
ghy-miR319	c45748.graph_c0	hypothetical protein	4	1222	1242	CUAGAGCUUCUUUUAGUUCAU	Cleavage
ghy-miR319	c47439.graph_c0	inactive ATP-dependent zinc metalloprotease FTSHI 3	4	63	83	CAAUGGCUUUCUUUAGUCCAA	Cleavage
ghy-miR319	c50300.graph_c0	serine/threonine-protein kinase ATM	4	5983	6005	AUAUUU-UCAAUAUGUAUAGCAUU	Translation
ghy-miR319	c54903.graph_c0	hypothetical protein	4	296	316	AAGGAGCUUGCUUUAGUCUAU	Cleavage
ghy-miR319	c11717.graph_c0	hypothetical protein	4.5	142	162	UGUGAUCUCCCUUUGGUUCAC	Cleavage
ghy-miR319	c12729.graph_c0	hypothetical protein	4.5	760	780	CGAGAGCUUCUUGCAGUCCAU	Cleavage
ghy-miR319	c24534.graph_c0	Alpha/beta hydrolase fold-3	4.5	984	1004	GAGGAGCUCAUUUUGGUUUGA	Cleavage
ghy-miR319	c25145.graph_c0	ubiquitin-conjugating enzyme E2	4.5	694	714	CCUGAGCUCCAUUCACUUCAA	Translation
ghy-miR319	c25777.graph_c0	SRG1-like	4.5	387	407	CUGGGGCUUCUUUCAGUUGAU	Cleavage
ghy-miR319	c30843.graph_c0	kinesin-like protein KIN-10A	4.5	2129	2149	CUGGAGCUUCUUUCGUUGCAA	Cleavage
ghy-miR319	c30944.graph_c1	hypothetical protein	4.5	294	314	CCAAGUGUGUAUAAGUGAAGA	Translation
ghy-miR319	c31252.graph_c0	PRD1 protein	4.5	548	568	UAUAAGCUUCCUUCAGUGUAA	Cleavage
ghy-miR319	c32113.graph_c0	root phototropism protein 2-like	4.5	264	284	ACGGAGCCUCUUUCAGACCAC	Cleavage
ghy-miR319	c33212.graph_c0	DET1- and DDB1-associated protein 1	4.5	207	227	AGGCAGCUCUCUUUGGUCUCA	Cleavage
ghy-miR319	c35090.graph_c0	serine/threonine-protein kinase phg2-like	4.5	1001	1021	AUCGAGUUUCUUUCUGUCCGA	Cleavage
ghy-miR319	c37094.graph_c0	NADH dehydrogenase [ubiquinone] 1 alpha subcomplex assembly factor 2	4.5	720	740	CGGGCGCUUCUUUUAGGCCAG	Cleavage
ghy-miR319	c38186.graph_c0	regulator of telomere elongation helicase 1 homolog	4.5	3570	3590	CUAAACAAGGUGCUUUUUUAU	Translation
ghy-miR319	c43924.graph_c0	phototropic-responsive NPH3 family protein	4.5	989	1009	CGAGAGCUUCUUGCAGUCCAU	Cleavage
ghy-miR319	c43925.graph_c0	integrin-linked protein kinase 1-like	4.5	1757	1777	CCGGAGCUUCCUUCACUCCCG	Cleavage
ghy-miR319	c44008.graph_c0	peptidase S10, serine carboxypeptidase, Alpha/Beta hydrolase fold protein	4.5	218	238	GAAGGGCUUCUUUCGGUUUGA	Cleavage
ghy-miR319	c44096.graph_c0	PC-Esterase	4.5	611	631	UAACAGUUCCCUUCAGUUCCA	Cleavage
ghy-miR319	c45178.graph_c0	RNA-directed DNA polymerase	4.5	2605	2625	AGGAUGGAGGCUGGAUCGAGA	Cleavage
ghy-miR319	c46057.graph_c0	putative nucleotidyltransferase, Ribonuclease H	4.5	3266	3285	GUUGAGCUCCCUU-GGUCCAA	Cleavage
ghy-miR319	c46519.graph_c0	pentatricopeptide repeat-containing protein	4.5	765	785	UUGGGGUUUUGUUCAGUUUAA	Translation
ghy-miR319	c47038.graph_c1	proline--tRNA ligase	4.5	1811	1831	UUCGAGUUCUUUUUGGUUUAA	Cleavage
ghy-miR319	c47062.graph_c1	mitochondrial carrier domain-containing protein	4.5	1854	1874	UCGGAGCUCUCUCAGGUCUAA	Cleavage
ghy-miR319	c47169.graph_c0	GLE1-like protein	4.5	1348	1368	CGGGUACUUUCUUUAGUCCAC	Cleavage
ghy-miR319	c48333.graph_c0	auxin-responsive protein IAA27-like	4.5	2439	2459	CAGGAGCUUUCUUCUCUUCAA	Cleavage
ghy-miR319	c48340.graph_c1	hypothetical protein	4.5	3228	3251	ACCAAUUUUUUCAUGACAUACAUU	Cleavage
ghy-miR319	c48961.graph_c0	NLP7-like protein	4.5	670	690	GACCCGAACUGCACCGGGCUU	Cleavage
ghy-miR319	c49424.graph_c0	hypothetical protein	4.5	1210	1230	UGAUUGUGCCUUGCUUCUUCC	Cleavage
ghy-miR319	c49884.graph_c0	uncharacterized protein	4.5	2730	2750	AACGAGCUUUUUUCGUUCCAA	Cleavage
ghy-miR319	c50412.graph_c2	hypothetical protein	4.5	227	247	UUUUGAUAGUUGACCUGUCUA	Cleavage
ghy-miR319	c53610.graph_c0	hypothetical protein	4.5	422	444	UCAA-GUGUUCUAGUUUCGGUAGU	Cleavage
ghy-miR319	c56046.graph_c0	ribonuclease H-like domain, Reverse transcriptase, RNA-dependent DNA polymerase	4.5	611	631	GUGGAGCUUGCUUCAAUCCAU	Cleavage
ghy-miR319	c10549.graph_c0	uncharacterized protein	5	35	55	UGGGAAUUUCUUUUGGUUUAG	Cleavage
ghy-miR319	c10593.graph_c0	2-oxoglutarate dehydrogenase	5	867	887	AGGAAUCUCCCUUUGUUCCAG	Cleavage
ghy-miR319	c17696.graph_c0	purple acid phosphatase 23	5	953	973	AGGGGUCACGCUUCGGUCUAA	Cleavage
ghy-miR319	c25160.graph_c0	uncharacterized protein	5	1332	1352	CAUUGUCUCUUUUCAGUCCAA	Cleavage
ghy-miR319	c30771.graph_c0	anaphase-promoting complex subunit 5	5	3071	3091	UAUGUUAACUUAUUUUUGUUA	Translation
ghy-miR319	c32771.graph_c0	plasma membrane-associated cation-binding protein 1	5	864	884	UCAGGGCUCCCUGCAGUUCGC	Cleavage
ghy-miR319	c35138.graph_c0	unnamed protein product	5	2292	2312	CCCGAGCUCUUUUGAGUUCAC	Cleavage
ghy-miR319	c41162.graph_c0	transcription factor DIV1	5	174	194	UUUAAGCUUCAUUUGGUCCAA	Translation
ghy-miR319	c43660.graph_c0	Retrovirus-related Pol polyprotein from transposon TNT 1-94	5	1025	1048	UGAGGCAAGUUAUGUCGGGAUCAU	Cleavage
ghy-miR319	c43978.graph_c0	transcription termination factor MTERF5	5	903	924	AUGGAGGUCCCUUUAUGUUCAA	Cleavage
ghy-miR319	c44213.graph_c0	glucan endo-1,3-beta-glucosidase 14-like	5	895	915	UGGGGUCUCCUUUUUGUUUAA	Cleavage
ghy-miR319	c44652.graph_c0	uncharacterized protein	5	1031	1051	CUUGAGCUUUCUUCAGUAUAU	Cleavage
ghy-miR319	c45389.graph_c0	uncharacterized protein	5	375	395	ACCAAGCUGCCUUCAAUCCAA	Cleavage
ghy-miR319	c45947.graph_c0	cold-responsive protein kinase 1-like	5	269	289	CGAGAGUUCCUUUUCGUUCAG	Cleavage
ghy-miR319	c47050.graph_c0	unnamed protein product	5	1011	1034	UCCCUUGUUAACAUGUAUAGAGUA	Translation
ghy-miR319	c47061.graph_c0	Zinc finger, Dof-type	5	1781	1801	AGGUAGCUUCCUACUGUCUAA	Cleavage
ghy-miR319	c47205.graph_c0	indeterminate-domain 2-like	5	2017	2037	UUGAUCAUGUUGGUAGCUGAC	Cleavage
ghy-miR319	c47271.graph_c1	unnamed protein product	5	1056	1076	UUUUUGCUCCCUUCAUUUCAA	Cleavage
ghy-miR319	c47399.graph_c0	unnamed protein product	5	3177	3200	AUCGUUAGAGCUUCAAGGCAGAAG	Cleavage
ghy-miR319	c47525.graph_c0	spermatogenesis-associated protein 20	5	689	709	CUGGAGCUUCCUUCAGCCUCU	Cleavage
ghy-miR319	c48041.graph_c0	5'-adenylylsulfate reductase 1	5	1478	1498	UGAUAGCUGCUUUCAGUCCAU	Cleavage
ghy-miR319	c48208.graph_c0	autophagy-related protein 18f	5	1977	2000	UUACAAACGCAGUAAGAUACCCAA	Cleavage
ghy-miR319	c49428.graph_c1	increased DNA methylation 1-like	5	408	428	GAUGAGCUUCCUUCGGUCUUU	Cleavage
ghy-miR319	c49610.graph_c0	leucine-rich repeat protein kinase family protein	5	74	99	AUCACAGAGCCGUGUGUGUGUUUGAU	Translation
ghy-miR319	c50133.graph_c0	uncharacterized protein	5	182	202	AGUGAGCUUCUGUCGGUUCAG	Translation
ghy-miR319	c55442.graph_c0	F-box family protein	5	127	147	UGGAAGCUCCCAAUGGUCCAA	Translation
ghy-miR319	c57208.graph_c0	hypothetical protein	5	289	309	UGGGAUCUGCCUUCGGUUUGG	Cleavage
ghy-miR319	c69307.graph_c0	uncharacterized protein	5	165	185	GGGUGGUACCUUGCAGUCCAA	Cleavage
ghy-miR319	c76127.graph_c0	hypothetical protein	5	195	215	CGUGAGUUCCCAUCACUUCAA	Translation
ghy-miR390	c46814.graph_c0	Glycine dehydrogenase	2	2122	2142	GAUGUUAUCCCUUCUGGGCUU	Cleavage
ghy-miR390	c19174.graph_c0	serine-threonine/tyrosine-protein kinase catalytic domain-containing protein	2.5	1754	1774	GGUCCUGUCCCUCUUGAGCUU	Cleavage
ghy-miR390	c46997.graph_c0	endoglucanase 6-like	2.5	1732	1752	AGCGUUAUGCCUUCUGAGCUU	Cleavage
ghy-miR390	c49282.graph_c2	protein phosphatase 2C	2.5	764	784	UCUGCUAUUCCUCCUGAUCUU	Cleavage
ghy-miR390	c49813.graph_c0	TMV resistance protein N-like	3	1178	1201	AGAAAUAAAGAUUCUGUUAGUCCU	Cleavage
ghy-miR390	c14528.graph_c0	universal stress protein PHOS34	3.5	123	143	GUUGAUAUCCUUACUGAGCUU	Cleavage
ghy-miR390	c23797.graph_c0	RNA-directed DNA polymerase	3.5	80	100	GCCGUUUUCUCUGCUGAGCUU	Cleavage
ghy-miR390	c30274.graph_c0	uncharacterized protein	3.5	741	761	UGUGGUAUUACUCCUGAGCUU	Cleavage
ghy-miR390	c30274.graph_c0	uncharacterized protein	3.5	741	761	UGUGGUAUUACUCCUGAGCUU	Cleavage
ghy-miR390	c36379.graph_c0	dnaJ protein homolog 1	3.5	843	863	GGCGUAAUCCCUUCUGAUCUU	Cleavage
ghy-miR390	c40627.graph_c0	cold-regulated 413 plasma membrane protein 1-like	3.5	404	427	AAUGAGAAAAAUUCUGUAAAUCUA	Cleavage
ghy-miR390	c42784.graph_c0	uncharacterized protein	3.5	751	771	CUCGCUGUUCUUCUUGAGCGU	Cleavage
ghy-miR390	c42808.graph_c0	unnamed protein product	3.5	781	801	AGUGUGAUCCCUCUUGGGUUU	Cleavage
ghy-miR390	c44914.graph_c0	PHD finger protein	3.5	1008	1028	CAUGCUAUUCCUCUUGGACUU	Cleavage
ghy-miR390	c47417.graph_c1	RNA-directed DNA polymerase	3.5	485	505	ACCGUUAUCUCUUGUGAGUUU	Cleavage
ghy-miR390	c47736.graph_c0	uncharacterized protein	3.5	490	510	CGGUGAUGGUCGAGCUGUUCU	Cleavage
ghy-miR390	c50111.graph_c1	CLIP-associated protein	3.5	3702	3725	UAGUCUUUCGAAACUUGCGUCUUU	Cleavage
ghy-miR390	c50163.graph_c1	ATP-dependent (S)-NAD(P)H-hydrate dehydratase	3.5	1112	1132	AGAGCUAUUCCGCUUGAGCUU	Translation
ghy-miR390	c69312.graph_c0	hypothetical protein	3.5	3	23	GAUGUUAGCCCUCGUGAGCUU	Cleavage
ghy-miR390	c29561.graph_c0	BONZAI 3 protein	4	1457	1477	AACGCUUUCCUGCUUGGGCUU	Translation
ghy-miR390	c33735.graph_c0	GDP-mannose transporter GONST1	4	778	798	UCUGUUAUCCCUCCAGAGAUU	Cleavage
ghy-miR390	c34586.graph_c0	hypothetical protein	4	271	294	GUUUGAUAUCCAACCAUGUACCAU	Cleavage
ghy-miR390	c37216.graph_c0	hypothetical protein	4	968	988	UUCGUUAUUCUUCUUGAUUUU	Cleavage
ghy-miR390	c38199.graph_c0	hypothetical protein	4	440	460	AACGCCAUGCCUCCUGUGCUU	Cleavage
ghy-miR390	c38536.graph_c0	copia-type polyprotein	4	1427	1447	UCCGCCAUUCUUCUUGACCUU	Cleavage
ghy-miR390	c38575.graph_c0	hypothetical protein	4	497	517	CUUGUUCUUCUUCUUGGGCUU	Cleavage
ghy-miR390	c38944.graph_c0	guanine nucleotide exchange factor SPIKE 1	4	1054	1074	UAUACAUAUUCUUUUUUGUCA	Cleavage
ghy-miR390	c44542.graph_c0	unnamed protein product	4	1828	1848	ACUGCUAGAUCUCUUGAGCUU	Cleavage
ghy-miR390	c45595.graph_c0	calcium/calmodulin-regulated receptor-like kinase 1	4	1917	1937	GGUGUUGUGCUUCUUGAGCUU	Cleavage
ghy-miR390	c45629.graph_c0	LRR receptor-like serine/threonine-protein kinase	4	1208	1228	GGCACCAUUCCUCCUGAGGUU	Cleavage
ghy-miR390	c46099.graph_c0	uncharacterized protein	4	1957	1977	ACGUCUAGCUUUCCUGAGCUU	Cleavage
ghy-miR390	c47254.graph_c0	acyl-activating enzyme 16	4	459	479	AACUUUGUUCCUCCUGAUCUU	Cleavage
ghy-miR390	c47492.graph_c0	MDIS1-interacting receptor like kinase 2-like	4	1099	1119	UCUUCGAUUCCUUCUGAGCUU	Cleavage
ghy-miR390	c47716.graph_c2	tubby-like F-box protein 8	4	778	801	UGGGCUAAUCUCCCUCCUGAGCUU	Cleavage
ghy-miR390	c48137.graph_c0	Tic22-like protein	4	924	944	GUCUUUAUCCCUCCUGGUUUU	Cleavage
ghy-miR390	c48816.graph_c1	uncharacterized protein	4	2205	2225	GCCGCGAUUUCUCGUGGGCUU	Cleavage
ghy-miR390	c49552.graph_c0	transcription factor TCP4-like	4	200	220	GUAGCUAUCUAUUCUGAGUUU	Translation
ghy-miR390	c50188.graph_c0	disease resistance protein RUN1	4	2937	2957	UCCGUUAACCUUCUUGAGCCU	Cleavage
ghy-miR390	c7751.graph_c0	hypothetical protein	4	223	243	CACGCCGUCCGUUUUGAGCUU	Translation
ghy-miR390	c11621.graph_c0	RNA-binding protein BRN1-like	4.5	235	255	CUUGUUGUCUCUUUUGAGUUG	Cleavage
ghy-miR390	c13500.graph_c1	auxin response factor 18	4.5	314	334	CGUGCCAGCACUCCUGAGUUU	Cleavage
ghy-miR390	c17707.graph_c0	large proline-rich protein bag6-B	4.5	1109	1129	GGCGCUCUUUUGCUUGAGCUU	Translation
ghy-miR390	c17707.graph_c0	large proline-rich protein bag6-B	4.5	1109	1129	GGCGCUCUUUUGCUUGAGCUU	Translation
ghy-miR390	c18474.graph_c0	zinc finger CCCH domain-containing protein 20-like	4.5	310	330	CGAGUUCUCCCUACUGAGUUU	Cleavage
ghy-miR390	c2293.graph_c0	ABC transporter G family member 28-like	4.5	301	321	UGUGUUACCCUUCGUGGGCUU	Cleavage
ghy-miR390	c25297.graph_c0	heat shock 70 kDa protein	4.5	1310	1330	GGAGAUAUCCUUCUUGUGCUU	Cleavage
ghy-miR390	c25784.graph_c0	calvin cycle protein CP12-3	4.5	44	64	GGAGCUAACCCUUUCGAGCUU	Cleavage
ghy-miR390	c29437.graph_c0	4-hydroxyphenylpyruvate dioxygenase	4.5	343	363	CCCGUUAUCAUUCUUGAGCAU	Cleavage
ghy-miR390	c29541.graph_c0	F-box protein	4.5	287	306	GGC-CUUUUUCUUCUGAGCUU	Cleavage
ghy-miR390	c30338.graph_c0	uncharacterized protein	4.5	589	609	UGUUUUUUCCCUCUUGGGUUU	Cleavage
ghy-miR390	c30413.graph_c0	SCO1 homolog 2	4.5	834	854	CGUGAUACCCCUUCUCAGCUU	Cleavage
ghy-miR390	c33241.graph_c0	acyl-activating enzyme 1	4.5	291	311	GGUGCAGUCCUUUCUGCGCUU	Cleavage
ghy-miR390	c33559.graph_c0	asparagine synthetase domain-containing protein 1	4.5	1789	1809	AUUGCUAUCGCUGCUGAGCUC	Cleavage
ghy-miR390	c34188.graph_c0	unnamed protein product	4.5	1939	1959	GUGUCAGUCCUUCUUGAGCUU	Cleavage
ghy-miR390	c35165.graph_c0	hypothetical protein	4.5	209	229	AUUGCUAUUCCUUCUGAAAUU	Cleavage
ghy-miR390	c37555.graph_c0	eukaryotic translation initiation factor 3 subunit K	4.5	300	320	UGCUGUAUUUCUCUUGAGCUC	Cleavage
ghy-miR390	c40841.graph_c0	chloride channel protein CLC-c-like	4.5	2451	2471	UUGCAUUUAGGGAGCUCGGCC	Cleavage
ghy-miR390	c42582.graph_c0	9-cis-epoxycarotenoid dioxygenase NCED1	4.5	706	726	CGCCCGGUCUCUCUUGGGUUU	Cleavage
ghy-miR390	c42599.graph_c0	hypothetical protein	4.5	642	662	GCCGCUCUUUCUCUUGGGUUC	Cleavage
ghy-miR390	c43622.graph_c0	DNA-(apurinic or apyrimidinic site) lyase	4.5	2146	2166	UGCCCUGUUUCUCUCGAGCUU	Cleavage
ghy-miR390	c43915.graph_c0	F-box/kelch-repeat protein	4.5	288	308	AGCGAUAUUCCUUCUGAUCUG	Cleavage
ghy-miR390	c44644.graph_c0	hypothetical protein	4.5	115	135	UGUGCUGUCCCUAUUGGGCUG	Cleavage
ghy-miR390	c45303.graph_c0	RKD5-like protein	4.5	134	154	GAAGUUAUGCCUUCUGAGCUC	Cleavage
ghy-miR390	c45762.graph_c1	LRR receptor-like serine/threonine-protein kinase	4.5	562	582	GCUGCUAUUCCACCAGAGUUU	Translation
ghy-miR390	c46200.graph_c0	pleiotropic drug resistance protein 1-like	4.5	4552	4572	AAUGUUGUUUUUCCGGAGCUU	Cleavage
ghy-miR390	c46227.graph_c0	peptide deformylase 1A	4.5	1031	1051	UAAUGGCGGGUUUGGAGGAAG	Cleavage
ghy-miR390	c47032.graph_c3	hypothetical protein	4.5	541	564	UGGGCUAAUCUUCCUCCUGAGCUU	Cleavage
ghy-miR390	c47301.graph_c0	alpha-L-fucosidase 2	4.5	1250	1270	AAUCGUGUCUCUCUUGAGCUU	Cleavage
ghy-miR390	c47458.graph_c0	heavy metal-associated isoprenylated plant protein 3	4.5	1920	1940	GGCAUUAACCCUUUUGAGCUA	Cleavage
ghy-miR390	c48545.graph_c1	hypothetical protein	4.5	97	117	ACAACUAUUCUUCUUGGGUUU	Cleavage
ghy-miR390	c51542.graph_c0	surfeit locus protein 2-like	4.5	285	305	CUGGCUUUUCUUCUUGAGCUG	Cleavage
ghy-miR390	c58579.graph_c0	uncharacterized protein	4.5	34	54	GUGGAUGUCCCUCCUGGGUUC	Cleavage
ghy-miR390	c68559.graph_c0	uncharacterized protein	4.5	94	114	CUCGUUAUGCCUUUUGGGCUC	Cleavage
ghy-miR390	c72414.graph_c0	crocetin glucosyltransferase	4.5	4	24	GAAUCUCUUCCUUUUGAGCUU	Cleavage
ghy-miR390	c77959.graph_c0	serine hydroxymethyltransferase	4.5	25	45	CAGGCUGUCUUUCCUGGACUU	Cleavage
ghy-miR390	c12329.graph_c0	translation machinery associated TMA7	5	208	226	AGCGCU--CCCUUUUGAGCUU	Cleavage
ghy-miR390	c12805.graph_c0	U-box domain-containing protein 26-like	5	159	182	UCAUGACGGAUCCGGUUACCGUCG	Cleavage
ghy-miR390	c19220.graph_c0	uncharacterized protein	5	582	602	UAACCUAUUCCUCCUGGAUUU	Cleavage
ghy-miR390	c22326.graph_c0	ylmG homolog protein 1-2	5	605	625	AAUAUUAUUCCUCCUGUGUUU	Cleavage
ghy-miR390	c28340.graph_c0	Ankyrin repeat-containing protein	5	45	65	AAGCAUAUCUUUCUUGGGCUU	Cleavage
ghy-miR390	c31152.graph_c0	S-adenosylmethionine synthase 2	5	267	287	AGCCUUGUCCCACUUGAGCUC	Translation
ghy-miR390	c32238.graph_c0	unnamed protein product	5	266	286	GUGUUUAUCUUUUCUGGGUUU	Cleavage
ghy-miR390	c3425.graph_c0	Retrovirus-related Pol polyprotein from transposon RE1	5	156	176	UCCGCGAUCCCUCCUCAGCAA	Cleavage
ghy-miR390	c36417.graph_c0	uncharacterized protein	5	1896	1916	UCCUUUAUUUCUCCUGAACUG	Cleavage
ghy-miR390	c37743.graph_c0	xylulose 5-phosphate/phosphate translocator	5	2054	2074	GGCUUUGUUGUUUCUGAGCUU	Cleavage
ghy-miR390	c40390.graph_c0	uncharacterized Rho GTPase-activating protein At5g6153	5	748	768	CUGGCUAGCCUUCCUGAGCCA	Cleavage
ghy-miR390	c40549.graph_c0	Retrovirus-related Pol polyprotein from transposon TNT 1-94	5	501	521	AGCGAUAUCCCUUUUGUGAUU	Cleavage
ghy-miR390	c40741.graph_c0	BTB/POZ and TAZ domain-containing protein 1-like	5	1131	1151	CGCCCUGUUCUUGCUGGGUUU	Cleavage
ghy-miR390	c41927.graph_c0	unnamed protein product	5	533	553	CAUGUUGUCCCUUCUGGGCAG	Cleavage
ghy-miR390	c44297.graph_c0	Retrovirus-related Pol polyprotein from transposon TNT 1-94	5	761	781	AUGGAUGUCCCUCUUGGACUU	Cleavage
ghy-miR390	c44861.graph_c2	non-specific protein-tyrosine kinase RLK-Pelle-RLCK-VIII family	5	1232	1252	GGGGUUGUUCUGCUUGAGCUU	Translation
ghy-miR390	c44884.graph_c0	LRR receptor-like serine/threonine-protein kinase FEI 1	5	975	995	CAGCCUACAGGGAGCCAGAAU	Cleavage
ghy-miR390	c45287.graph_c0	protein kinase RLK-Pelle-RLCK-VIIa-2 family	5	1088	1108	GGUAUCGUUCUUCUUGAGCUU	Cleavage
ghy-miR390	c45330.graph_c0	uncharacterized protein	5	507	527	CGCGCUGUUGCUGUUGAGUUU	Cleavage
ghy-miR390	c45802.graph_c0	ubiquitin domain-containing protein DSK2a-like	5	557	577	CAGAGAUGAUGCGUGGUCUGA	Cleavage
ghy-miR390	c45918.graph_c0	glutathione reductase	5	807	827	GGCUAUAUUGCUCUUGAGUUU	Cleavage
ghy-miR390	c45921.graph_c0	autophagy-related protein 18a-like	5	1506	1526	AAUUCUAUCCCGCCUGAGCCU	Translation
ghy-miR390	c46782.graph_c0	myosin-11	5	3587	3610	UAUUUUAAAUAUUGAUAAGUGUUA	Cleavage
ghy-miR390	c47197.graph_c0	UPSTREAM OF FLC protein	5	139	159	UGCGUUGUUCUUUUUGAAUUU	Cleavage
ghy-miR390	c47871.graph_c0	uncharacterized protein	5	1841	1861	CAUUCUAUUCUCUCUGAGCUU	Translation
ghy-miR390	c47975.graph_c0	LRR receptor kinase SERK2	5	633	653	GGUAGCAUUCCUCUUGAGCUU	Cleavage
ghy-miR390	c48005.graph_c0	CWF19-like protein 2 homolog	5	571	591	GGCUCCAUUCUUCUUCAGCUU	Cleavage
ghy-miR390	c48189.graph_c0	uncharacterized protein	5	2099	2119	GCUAGUGUUCCUCUUGAGUUU	Cleavage
ghy-miR390	c48399.graph_c0	histidine kinase 2	5	253	274	UGAUGUUUCUUUCGGCUUCACA	Translation
ghy-miR390	c48507.graph_c0	unnamed protein product	5	1442	1465	AUCUUGAUGAUGAAGUCGGCAGUA	Cleavage
ghy-miR390	c48911.graph_c0	uncharacterized protein	5	1898	1919	ACGAUUCACGGGAUCGUAGGUA	Translation
ghy-miR390	c49896.graph_c0	hypothetical protein	5	4523	4543	UGUAAGGGCCCUGUUCCUUCA	Cleavage
ghy-miR390	c50250.graph_c1	protein kinase-like domain-containing protein	5	564	584	GGAGAUAUCCCUCAUGAACUU	Cleavage
ghy-miR390	c50416.graph_c0	Disease resistance protein	5	1667	1687	AUGUCUAUUCCUUUUGAGUUA	Cleavage
ghy-miR390	c50442.graph_c0	trithorax group protein osa-like	5	3152	3175	ACCGCAGUAGCUUUGAACCACAAU	Cleavage
ghy-miR390	c52071.graph_c0	RNA-directed DNA polymerase	5	410	430	ACCGAUAUCCUUUCUGAGUGC	Cleavage
ghy-miR390	c54513.graph_c0	hypothetical protein	5	1165	1185	CGGUUUAUUCCUCCUAGGCUU	Cleavage
ghy-miR390	c63117.graph_c0	uncharacterized protein	5	122	141	GGCGUUA-CCCUUUGGAGCUU	Cleavage
ghy-miR5368	c46998.graph_c1	uncharacterized protein	3.5	283	301	UGUCUUCCUGAGAUUAUUC	Cleavage
ghy-miR5368	c56847.graph_c0	basic leucine zipper 61-like	3.5	239	257	UGGCUGCCGGAGACUGUCU	Translation
ghy-miR5368	c24137.graph_c0	tRNA (cytosine(34)-C(5))-methyltransferase	4	1442	1460	UGUCUACAUGGGAUUGGCC	Cleavage
ghy-miR5368	c34464.graph_c0	cytochrome P450 mono-oxygenase	4	265	283	UAUCAAUCUUAGACUGUCC	Translation
ghy-miR5368	c46284.graph_c0	BTB and TAZ domain protein 4	4	1458	1476	GUUCCACCUGAGGCUGUUC	Cleavage
ghy-miR5368	c47790.graph_c0	hypothetical protein	4	3579	3597	UAUUUUCAUGAGACUGUCC	Cleavage
ghy-miR5368	c48289.graph_c0	transmembrane 9 superfamily member 3-like	4	3040	3058	AGUCAACCUGAUGCUGUCC	Cleavage
ghy-miR5368	c49450.graph_c0	MAG2-interacting protein 2	4	2050	2068	GCUAUUCCUGAGACUGUCC	Cleavage
ghy-miR5368	c65777.graph_c0	hypothetical protein	4	34	52	UCUCUGCUUGAGCCUGUCU	Cleavage
ghy-miR5368	c24495.graph_c0	DNA-directed RNA polymerase I subunit 1	4.5	2482	2500	UGUUUGCAUGAGAUUAUCC	Cleavage
ghy-miR5368	c28296.graph_c0	hypothetical protein	4.5	755	773	UGUCCACAUGAGACAGUCU	Cleavage
ghy-miR5368	c35274.graph_c0	uncharacterized protein	4.5	1353	1371	UUUCUAUCUGAGGCGGUUU	Cleavage
ghy-miR5368	c37376.graph_c0	unnamed protein product	4.5	761	779	UGUCUGGCUGAGAUUGAUC	Cleavage
ghy-miR5368	c39142.graph_c0	uncharacterized protein	4.5	528	545	UCUCUACCUGAGAC-GUCU	Cleavage
ghy-miR5368	c39769.graph_c0	uncharacterized protein	4.5	1767	1785	GGUCGACUUGCGACUGUUC	Cleavage
ghy-miR5368	c40632.graph_c0	transmembrane and coiled-coil domain-containing protein 4	4.5	171	189	UGCAUGCUUGAGAUUGUCA	Cleavage
ghy-miR5368	c45596.graph_c0	golgin candidate 5-like	4.5	351	369	CUUUUGCCUGAGAUUGUCG	Cleavage
ghy-miR5368	c46240.graph_c1	translation factor GUF1 homolog	4.5	1109	1127	UGUUUUCUUGAGACAGUUU	Cleavage
ghy-miR5368	c49004.graph_c0	exocyst complex component	4.5	555	573	CCUCUGCCUGAGAAUGUUC	Cleavage
ghy-miR5368	c49523.graph_c1	ABHD17C-like protein	4.5	1381	1399	UGACUACAUGAGAGUGUCU	Cleavage
ghy-miR5368	c50060.graph_c1	PREDICTED: 39S ribosomal protein L41-A	4.5	2492	2510	UUUUUACUUGAUAUUGUCU	Cleavage
ghy-miR5368	c50536.graph_c0	uncharacterized protein	4.5	508	526	UUUUUACCUGGGAUUAUUC	Cleavage
ghy-miR5368	c50747.graph_c0	hypothetical protein	4.5	656	674	AGCCUACUUGAGACGGUUC	Cleavage
ghy-miR5368	c51390.graph_c0	serine/threonine-protein kinase	4.5	300	318	GGUCGACCUGGGGCUGUUG	Cleavage
ghy-miR5368	c70397.graph_c0	hypothetical protein	4.5	175	193	UGUCAAGCUGGGAAUGUCC	Cleavage
ghy-miR5368	c8026.graph_c0	uncharacterized protein	4.5	228	246	UAUCUACCUUAGCUUGUCC	Translation
ghy-miR5368	c90178.graph_c0	hypothetical protein	4.5	103	121	AGGCUACCAGAGACUGUUU	Translation
ghy-miR5368	c11221.graph_c0	unknown protein	5	913	931	AUUCAACUUGAGAUUGUCG	Cleavage
ghy-miR5368	c12073.graph_c0	beta-taxilin	5	699	717	CCUUCAUCUGGGACUGUUC	Cleavage
ghy-miR5368	c12150.graph_c0	ERI1 exoribonuclease 3-like	5	769	787	GGUCAAACUGGGACUGUCG	Cleavage
ghy-miR5368	c19420.graph_c0	RNA-directed DNA polymerase	5	425	443	GAUCUUCAUGAGACUGUCU	Cleavage
ghy-miR5368	c20246.graph_c0	endoglucanase 25-like	5	619	637	AGUCAACCUGAGUCUGUGC	Cleavage
ghy-miR5368	c21460.graph_c1	hypothetical protein	5	326	345	GGUCUGACCAGAGAUUGUCC	Translation
ghy-miR5368	c22196.graph_c0	glutamyl-tRNA(Gln) amidotransferase subunit B	5	1662	1680	CCUUUGCUUGAGAUUGUUU	Cleavage
ghy-miR5368	c24742.graph_c0	quinolinate synthase	5	1161	1179	GGUUUUCCUGAGGUUGUUG	Cleavage
ghy-miR5368	c24781.graph_c0	oligopeptide transporter, OPT superfamily	5	1033	1051	UGUUUACCGGAGAUGGUCA	Translation
ghy-miR5368	c26037.graph_c0	aquaporin PIP2-5-like	5	838	856	UCUCUGUCUGUGAUUGUCG	Cleavage
ghy-miR5368	c28376.graph_c0	hypothetical protein	5	562	580	GGCUUACUUGAGAUUGUUG	Cleavage
ghy-miR5368	c31179.graph_c0	unnamed protein product	5	430	448	GGUCUUCUUGACAUUGUUC	Cleavage
ghy-miR5368	c32941.graph_c0	protein phosphatase 2C	5	435	453	UGUUUACGUGACGCUGUCG	Cleavage
ghy-miR5368	c34677.graph_c0	uncharacterized protein	5	490	508	CGUCUACCUGGGAUCGUUG	Cleavage
ghy-miR5368	c34981.graph_c0	unnamed protein product	5	854	872	CGUUUCCUUGGGGUUGUUC	Cleavage
ghy-miR5368	c3744.graph_c0	hypothetical protein	5	2	20	UGUCUUCCUAAGGUUGUUG	Translation
ghy-miR5368	c39274.graph_c0	Detected protein of unknown function	5	215	233	AUAUUGCUUGAGAUUGUCC	Cleavage
ghy-miR5368	c40243.graph_c0	Histone acetyltransferase HAC1	5	27	45	AGGCUACUAGAGAUUGUUC	Translation
ghy-miR5368	c40576.graph_c2	Armadillo	5	961	979	CCUCUACCUGAGCCUUUCC	Cleavage
ghy-miR5368	c40978.graph_c0	hypothetical protein	5	891	909	UGUUGACCCGAGAUUGUUG	Translation
ghy-miR5368	c43599.graph_c1	ribosome-binding factor PSRP1	5	2898	2914	UGUC--CCUGAGAUUGUUC	Cleavage
ghy-miR5368	c44264.graph_c0	succinate-semialdehyde dehydrogenase	5	1103	1121	GGUUCAGCUGAGACUGUCA	Cleavage
ghy-miR5368	c44302.graph_c2	40S ribosomal protein S23	5	1185	1203	UGUUUACUUGUUGCUGUCU	Cleavage
ghy-miR5368	c44658.graph_c4	uncharacterized protein	5	1855	1873	UGUUUGCUUGAUGUUGUCA	Cleavage
ghy-miR5368	c44888.graph_c0	transcription factor KAN2	5	580	598	UGUUUACUUGAGAAUCUUU	Cleavage
ghy-miR5368	c45901.graph_c0	TWIN LOV 1 protein	5	993	1011	GGUUUUCAUGAGGCUGUUC	Cleavage
ghy-miR5368	c46220.graph_c0	inositol monophosphatase family protein	5	1558	1576	UGUUUACCUUGGAUUAUUC	Translation
ghy-miR5368	c47120.graph_c0	uncharacterized protein	5	224	242	UGUCUGCUUGAGGUUCUAC	Cleavage
ghy-miR5368	c48230.graph_c0	disease resistance-like protein DSC1	5	1464	1482	UGAUUAUCUGGAACUGUCG	Cleavage
ghy-miR5368	c48332.graph_c0	TSL-kinase interacting protein 1-like	5	2085	2105	GUGUGGCAUUGUCAACAUUUG	Cleavage
ghy-miR5368	c49206.graph_c1	unnamed protein product	5	1879	1897	GGUUUUCUUGAGGUUGUCG	Cleavage
ghy-miR5368	c49794.graph_c1	AP-2 complex subunit alpha-1-like	5	707	724	UGUUUAC-UGAGGCUGUUU	Cleavage
ghy-miR5368	c49992.graph_c0	SABRE protein	5	10056	10074	CAUCGACCUGGGACUUUCC	Cleavage
ghy-miR5368	c50015.graph_c0	7-deoxyloganetic acid glucosyltransferase-like	5	1396	1414	AGUCCAUCGGAGAUUGUCU	Translation
ghy-miR5368	c50270.graph_c0	unnamed protein product	5	1521	1541	UGUUUUCACCUGAGAAUGUCU	Cleavage
ghy-miR5368	c50369.graph_c0	uncharacterized protein	5	2687	2705	CCUUAACUUGAGAUUGUCU	Cleavage
ghy-miR5368	c79301.graph_c0	hypothetical protein	5	40	58	UGUCUUCAUGAAAUUGUUC	Cleavage
ghy-miR5368	c88684.graph_c0	Retrovirus-related Pol polyprotein from transposon TNT 1-94	5	7	25	AGGUUGUUUGAGAUUGUUC	Cleavage
ghy-miR5368	c90552.graph_c0	hypothetical protein	5	214	232	CACCUACCUGGGGCUGUUU	Cleavage
ghy-miR6113a	c50153.graph_c0	callose synthase 10	1	6621	6644	CCCCGGUAACUAAAACAGAACUUU	Cleavage
ghy-miR6113a	c49685.graph_c0	TMV resistance protein N-like	1.5	331	352	CGAUGUUUUUUUGAGCUUUAGA	Cleavage
ghy-miR6113a	c24263.graph_c0	unnamed protein product	2	83	104	GGUUGUAUUCUUGAGUUUUAGA	Cleavage
ghy-miR6113a	c51598.graph_c0	TMV resistance protein N-like	2.5	64	85	CGAUGUUUUCUUGAGCUUCAGA	Cleavage
ghy-miR6113a	c17240.graph_c1	hypothetical protein	3	1468	1489	AUGCGUGUUUUUGAGUUUUAGG	Cleavage
ghy-miR6113a	c34212.graph_c0	protein of unknown function	3	1334	1355	AUACGGGUUUUUGAGUUACAGA	Cleavage
ghy-miR6113a	c46593.graph_c1	RINT-1/TIP-1-like protein	3	3286	3306	UAGUUUAUAAAAUAACUCGUG	Cleavage
ghy-miR6113a	c47125.graph_c1	external alternative NAD(P)H-ubiquinone oxidoreductase B2	3	2881	2904	UGUUUCAAAUCAACCAUCGUAUUU	Cleavage
ghy-miR6113a	c48352.graph_c0	glycosyltransferase STELLO2	3	2107	2128	CUAGGUGUUUUUGAGUUUCCGA	Cleavage
ghy-miR6113a	c49813.graph_c0	TMV resistance protein N-like	3	1178	1201	AGAAAUAAAGAUUCUGUUAGUCCU	Cleavage
ghy-miR6113a	c53574.graph_c0	filament-like plant protein	3	289	310	GGUCGAGUUCUUGAGUGUUAGA	Cleavage
ghy-miR6113a	c28944.graph_c0	TMV resistance protein N-like	3.5	337	358	UGACGUGUUCUUAAGUUUUAGA	Cleavage
ghy-miR6113a	c42554.graph_c0	uncharacterized protein	3.5	672	693	UUUCGUCUUUUUGUGUUUCGGA	Cleavage
ghy-miR6113a	c42554.graph_c0	uncharacterized protein	3.5	672	693	UUUCGUCUUUUUGUGUUUCGGA	Cleavage
ghy-miR6113a	c43376.graph_c1	guard cell S-type anion channel SLAC1	3.5	846	867	CAAUUUCUUCUUGGGUUUCAGG	Cleavage
ghy-miR6113a	c43721.graph_c1	glycine--tRNA ligase	3.5	2992	3013	AGAAGUCUUCUCGAGUUUCAGA	Translation
ghy-miR6113a	c46775.graph_c0	TMV resistance protein N-like	3.5	2576	2599	CAUUAUAGUGGGAUACGAGAUCUU	Cleavage
ghy-miR6113a	c47156.graph_c0	heat shock 70 kDa protein 17	3.5	265	287	UCAUGUGAUUUUUGAGUUUUAGA	Cleavage
ghy-miR6113a	c48914.graph_c2	unnamed protein product	3.5	346	367	CCGCCUUUUCUUCAGUUUCAGA	Translation
ghy-miR6113a	c16018.graph_c0	hypothetical protein	4	626	649	GACUCUUCGAGGGUGUGGGGGGAU	Cleavage
ghy-miR6113a	c25547.graph_c0	unnamed protein product	4	976	997	UGAUGGGUUUUUGAGUUUCGGA	Cleavage
ghy-miR6113a	c37634.graph_c0	callose synthase 9	4	3291	3314	GCAUAUUUCAUGUAGUCGUCCUUU	Cleavage
ghy-miR6113a	c39073.graph_c0	WEAK CHLOROPLAST MOVEMENT UNDER BLUE LIGHT-like 1	4	1925	1946	AUUUGUGUUCUUCAGUUUUGGU	Translation
ghy-miR6113a	c39254.graph_c0	TMV resistance protein N-like	4	213	234	UGAUGUCUUCUUAAGUUUUAGA	Cleavage
ghy-miR6113a	c39700.graph_c0	canopy-1 protein	4	1886	1907	GGAUCGGUUUUUGAGUUUCAGU	Cleavage
ghy-miR6113a	c40925.graph_c0	B4 domain-containing protein	4	833	854	UUAUGUGAUUUUGAUUUUCAGG	Cleavage
ghy-miR6113a	c41414.graph_c0	uncharacterized protein	4	101	124	GGGUUGAAUAAUUAUUGGUGCAUU	Cleavage
ghy-miR6113a	c41710.graph_c0	kinesin-like protein KIN-7K	4	187	210	UUCACUGAAAACGGCACUGAAAAG	Translation
ghy-miR6113a	c45146.graph_c0	UPSTREAM OF FLC-like	4	1543	1564	GUACGUGUUCUUCAGGUUUGGA	Translation
ghy-miR6113a	c45368.graph_c0	lactosylceramide 4-alpha-galactosyltransferase-like	4	1812	1833	AUUUCUGUUUUUGAGUUUCAAA	Cleavage
ghy-miR6113a	c46893.graph_c0	common plant regulatory factor 1-like	4	2977	2997	AAAUGUGUUUUU-AGUUUCAGA	Translation
ghy-miR6113a	c47946.graph_c0	dual specificity protein kinase YAK1 homolog	4	2479	2500	GAGGAUGUUCUCGGGUUUCAGA	Translation
ghy-miR6113a	c48675.graph_c3	hypothetical protein	4	1377	1398	CACUAAUUUCUUGAGUUUCAGA	Cleavage
ghy-miR6113a	c49176.graph_c0	uncharacterized protein	4	672	693	UUACAUGUUCUUGAGUAUGAGA	Cleavage
ghy-miR6113a	c49298.graph_c1	wall-associated receptor kinase-like 16	4	599	620	CAACGUUUUUCUCAGUUUUAGA	Translation
ghy-miR6113a	c49298.graph_c1	wall-associated receptor kinase-like 16	4	599	620	CAACGUUUUUCUCAGUUUUAGA	Translation
ghy-miR6113a	c49341.graph_c0	hypothetical protein	4	1077	1099	ACUCGUGGUCUUUGAGUUUCAGA	Translation
ghy-miR6113a	c50188.graph_c0	disease resistance protein RUN1	4	2937	2957	UCCGUUAACCUUCUUGAGCCU	Cleavage
ghy-miR6113a	c50281.graph_c0	TMV resistance protein N	4	639	662	UGUUUCAAACAAAUCAUUGUAGUC	Cleavage
ghy-miR6113a	c12169.graph_c0	alcohol dehydrogenase	4.5	45	66	UGGCGUUUUCUUGAUUUUCUGG	Cleavage
ghy-miR6113a	c22108.graph_c0	uncharacterized protein	4.5	832	852	UGGCG-GUUUUUGAGUUUUUGA	Cleavage
ghy-miR6113a	c30442.graph_c0	uncharacterized protein	4.5	1542	1565	AAACCCUAGAGUUCUCGAAAUUUU	Cleavage
ghy-miR6113a	c30636.graph_c0	RING-H2 finger protein ATL73-like	4.5	1009	1029	UGAUG-GUUUUUGAGUUUCAAA	Cleavage
ghy-miR6113a	c34405.graph_c0	unnamed protein product	4.5	160	181	CGGUGGUUUUUAGGGUUUCAGA	Translation
ghy-miR6113a	c35264.graph_c0	Pentatricopeptide repeat-containing protein	4.5	4215	4236	CUUAGUGUUUUUGGGUUUCCGU	Cleavage
ghy-miR6113a	c39189.graph_c0	guanylate kinase 2	4.5	765	786	GGAUCUGUUCUUCGGUUUCAGU	Translation
ghy-miR6113a	c40203.graph_c0	Retrovirus-related Pol polyprotein from transposon TNT 1-94	4.5	275	296	AAUAUUGUUUUUGAGUUCUAGA	Cleavage
ghy-miR6113a	c40766.graph_c0	uncharacterized protein	4.5	625	648	AUAUAGUUUUUGGGGAAAAUGGUC	Cleavage
ghy-miR6113a	c41367.graph_c0	unnamed protein product	4.5	910	932	UGAGGUGUCUUUUGGGUUUUAGA	Cleavage
ghy-miR6113a	c41635.graph_c0	N-alpha-acetyltransferase 35, NatC auxiliary subunit	4.5	1379	1400	CGCUUUGUUGUAGAGUUUCAGA	Translation
ghy-miR6113a	c43714.graph_c0	toll/interleukin-1 receptor (TIR) domain-containing protein	4.5	1511	1532	UGACGUGUUCCUAAGUUUCAGA	Cleavage
ghy-miR6113a	c43896.graph_c0	uncharacterized protein	4.5	701	722	AGAGGUGUGCUUGGGUGUUAGA	Cleavage
ghy-miR6113a	c43918.graph_c0	uncharacterized protein	4.5	809	832	CGUGCCAAGUCAGCAGACAAAUGA	Cleavage
ghy-miR6113a	c45707.graph_c0	PHR1-LIKE 2-like protein	4.5	358	379	UAUGUUGUUCUUCAGUUUUAGG	Translation
ghy-miR6113a	c46124.graph_c0	unnamed protein product	4.5	20	43	UCAAGGAAACAGAGCUCCGGUUGU	Translation
ghy-miR6113a	c47063.graph_c0	peroxisomal acyl-coenzyme A oxidase 1-like	4.5	313	334	UAGCGUGUUCUUGAGAAUCGGU	Cleavage
ghy-miR6113a	c47154.graph_c0	pentatricopeptide repeat-containing protein	4.5	4478	4499	CGACGAGUGCUUGAAUUUCGGG	Cleavage
ghy-miR6113a	c49753.graph_c0	uncharacterized protein	4.5	981	1002	CAUAAUGUUUUUGGGUUGCAGA	Cleavage
ghy-miR6113a	c49884.graph_c0	uncharacterized protein	4.5	2730	2750	AACGAGCUUUUUUCGUUCCAA	Cleavage
ghy-miR6113a	c68629.graph_c0	40S ribosomal protein S2	4.5	79	100	GGGUGUUUUCUAGAGUUUUAGU	Translation
ghy-miR6113a	c73206.graph_c0	Retrovirus-related Pol polyprotein from transposon TNT 1-94	4.5	68	89	CAACUUAUUCUUGAGUUUCAAG	Cleavage
ghy-miR6113a	c81332.graph_c0	RNA-directed DNA polymerase	4.5	49	70	CUAAGUGUUCUUGACCUUUAGA	Cleavage
ghy-miR6113a	c28450.graph_c1	tubulin-folding cofactor A	5	505	526	CGAUGCCGUCUUGAUUUUCAGA	Cleavage
ghy-miR6113a	c28548.graph_c0	membrane-anchored ubiquitin-fold protein 6 precursor	5	211	232	GGACAUGUUCUUGAGUUUGAAU	Cleavage
ghy-miR6113a	c33864.graph_c0	uncharacterized protein	5	397	418	UGACAUUUUCUGGGGUUUUAGG	Translation
ghy-miR6113a	c34315.graph_c0	Remorin, C-terminal	5	955	979	AUCAUCAUAACUUGACCAAGUCUUU	Cleavage
ghy-miR6113a	c36175.graph_c0	unnamed protein product	5	131	152	CGACGUGUUCUUAAGUUUCCGG	Cleavage
ghy-miR6113a	c39432.graph_c0	uncharacterized protein	5	84	107	CAACUUUUAUGCAAAUGUUGUUUU	Cleavage
ghy-miR6113a	c39623.graph_c0	hypothetical protein	5	903	923	CGUUGAGGUGUUGUGGAGUGA	Translation
ghy-miR6113a	c40279.graph_c0	uncharacterized protein	5	1165	1186	UUGCAUCGGUCAUGGUGGCGGC	Cleavage
ghy-miR6113a	c40564.graph_c0	uncharacterized protein	5	826	847	GGAGGUGUUCUUGGGCUUUGGC	Cleavage
ghy-miR6113a	c45259.graph_c0	hypothetical protein	5	1329	1352	AUUGACCAUAUCAUGCUUUUUCUU	Cleavage
ghy-miR6113a	c46017.graph_c0	hypothetical protein	5	1587	1608	UGACAUAUUUAUGAGUUUCGGA	Cleavage
ghy-miR6113a	c47129.graph_c0	unnamed protein product	5	1879	1902	GCUGCUUUAUUCUUAGUAGUAUUU	Cleavage
ghy-miR6113a	c47759.graph_c0	NUCLEAR FUSION DEFECTIVE 4	5	2061	2081	GGAUGUGUUUUU-AGUUUUGGA	Translation
ghy-miR6113a	c48038.graph_c0	unnamed protein product	5	1830	1853	AUUCUCGGAGUCGUGUUGGCC-AUU	Cleavage
ghy-miR6113a	c48507.graph_c0	unnamed protein product	5	1442	1465	AUCUUGAUGAUGAAGUCGGCAGUA	Cleavage
ghy-miR6113a	c48644.graph_c0	LRR receptor-like serine/threonine-protein kinase RPK2	5	1808	1829	AAUGGUGUUCUUGAGCUUCAAG	Cleavage
ghy-miR6113a	c49845.graph_c0	hypothetical protein	5	98	119	CGCCAUUUUCUUGAGUUUCGAG	Cleavage
ghy-miR6113a	c50246.graph_c0	hypothetical protein	5	3126	3147	UGACCUCUUUUUGAAUUUCAGC	Cleavage
ghy-miR6113a	c50417.graph_c0	unnamed protein product	5	2125	2146	UACAGUGUUCUUGAAUUUCACU	Cleavage
ghy-miR6113b	c50153.graph_c0	callose synthase 11	1	6621	6644	CCCCGGUAACUAAAACAGAACUUU	Cleavage
ghy-miR6113b	c49685.graph_c0	TMV resistance protein N-like	1.5	331	352	CGAUGUUUUUUUGAGCUUUAGA	Cleavage
ghy-miR6113b	c24263.graph_c0	unnamed protein product	2	83	104	GGUUGUAUUCUUGAGUUUUAGA	Cleavage
ghy-miR6113b	c51598.graph_c0	TMV resistance protein N-like	2.5	64	85	CGAUGUUUUCUUGAGCUUCAGA	Cleavage
ghy-miR6113b	c17240.graph_c1	hypothetical protein	3	1468	1489	AUGCGUGUUUUUGAGUUUUAGG	Cleavage
ghy-miR6113b	c34212.graph_c0	protein of unknown function	3	1334	1355	AUACGGGUUUUUGAGUUACAGA	Cleavage
ghy-miR6113b	c46593.graph_c1	RINT-1/TIP-1-like protein	3	3286	3306	UAGUUUAUAAAAUAACUCGUG	Cleavage
ghy-miR6113b	c47125.graph_c1	external alternative NAD(P)H-ubiquinone oxidoreductase B2	3	2881	2904	UGUUUCAAAUCAACCAUCGUAUUU	Cleavage
ghy-miR6113b	c48352.graph_c0	glycosyltransferase STELLO2	3	2107	2128	CUAGGUGUUUUUGAGUUUCCGA	Cleavage
ghy-miR6113b	c49813.graph_c0	TMV resistance protein N-like	3	1178	1201	AGAAAUAAAGAUUCUGUUAGUCCU	Cleavage
ghy-miR6113b	c53574.graph_c0	filament-like plant protein	3	289	310	GGUCGAGUUCUUGAGUGUUAGA	Cleavage
ghy-miR6113b	c28944.graph_c0	TMV resistance protein N-like	3.5	337	358	UGACGUGUUCUUAAGUUUUAGA	Cleavage
ghy-miR6113b	c42554.graph_c0	uncharacterized protein	3.5	672	693	UUUCGUCUUUUUGUGUUUCGGA	Cleavage
ghy-miR6113b	c42554.graph_c0	uncharacterized protein	3.5	672	693	UUUCGUCUUUUUGUGUUUCGGA	Cleavage
ghy-miR6113b	c43376.graph_c1	guard cell S-type anion channel SLAC1	3.5	846	867	CAAUUUCUUCUUGGGUUUCAGG	Cleavage
ghy-miR6113b	c43721.graph_c1	glycine--tRNA ligase	3.5	2992	3013	AGAAGUCUUCUCGAGUUUCAGA	Translation
ghy-miR6113b	c46775.graph_c0	TMV resistance protein N-like	3.5	2576	2599	CAUUAUAGUGGGAUACGAGAUCUU	Cleavage
ghy-miR6113b	c47156.graph_c0	heat shock 70 kDa protein 17	3.5	265	287	UCAUGUGAUUUUUGAGUUUUAGA	Cleavage
ghy-miR6113b	c48914.graph_c2	unnamed protein product	3.5	346	367	CCGCCUUUUCUUCAGUUUCAGA	Translation
ghy-miR6113b	c16018.graph_c0	hypothetical protein	4	626	649	GACUCUUCGAGGGUGUGGGGGGAU	Cleavage
ghy-miR6113b	c25547.graph_c0	unnamed protein product	4	976	997	UGAUGGGUUUUUGAGUUUCGGA	Cleavage
ghy-miR6113b	c37634.graph_c0	callose synthase 9	4	3291	3314	GCAUAUUUCAUGUAGUCGUCCUUU	Cleavage
ghy-miR6113b	c39073.graph_c0	WEAK CHLOROPLAST MOVEMENT UNDER BLUE LIGHT-like 1	4	1925	1946	AUUUGUGUUCUUCAGUUUUGGU	Translation
ghy-miR6113b	c39254.graph_c0	TMV resistance protein N-like	4	213	234	UGAUGUCUUCUUAAGUUUUAGA	Cleavage
ghy-miR6113b	c39700.graph_c0	canopy-1 protein	4	1886	1907	GGAUCGGUUUUUGAGUUUCAGU	Cleavage
ghy-miR6113b	c40925.graph_c0	B5 domain-containing protein	4	833	854	UUAUGUGAUUUUGAUUUUCAGG	Cleavage
ghy-miR6113b	c41414.graph_c0	uncharacterized protein	4	101	124	GGGUUGAAUAAUUAUUGGUGCAUU	Cleavage
ghy-miR6113b	c41710.graph_c0	kinesin-like protein KIN-7K	4	187	210	UUCACUGAAAACGGCACUGAAAAG	Translation
ghy-miR6113b	c45146.graph_c0	UPSTREAM OF FLC-like	4	1543	1564	GUACGUGUUCUUCAGGUUUGGA	Translation
ghy-miR6113b	c45368.graph_c0	lactosylceramide 4-alpha-galactosyltransferase-like	4	1812	1833	AUUUCUGUUUUUGAGUUUCAAA	Cleavage
ghy-miR6113b	c46893.graph_c0	common plant regulatory factor 1-like	4	2977	2997	AAAUGUGUUUUU-AGUUUCAGA	Translation
ghy-miR6113b	c47946.graph_c0	dual specificity protein kinase YAK1 homolog	4	2479	2500	GAGGAUGUUCUCGGGUUUCAGA	Translation
ghy-miR6113b	c48675.graph_c3	hypothetical protein	4	1377	1398	CACUAAUUUCUUGAGUUUCAGA	Cleavage
ghy-miR6113b	c49176.graph_c0	uncharacterized protein	4	672	693	UUACAUGUUCUUGAGUAUGAGA	Cleavage
ghy-miR6113b	c49298.graph_c1	wall-associated receptor kinase-like 16	4	599	620	CAACGUUUUUCUCAGUUUUAGA	Translation
ghy-miR6113b	c49298.graph_c1	wall-associated receptor kinase-like 16	4	599	620	CAACGUUUUUCUCAGUUUUAGA	Translation
ghy-miR6113b	c49341.graph_c0	hypothetical protein	4	1077	1099	ACUCGUGGUCUUUGAGUUUCAGA	Translation
ghy-miR6113b	c50188.graph_c0	disease resistance protein RUN1	4	2937	2957	UCCGUUAACCUUCUUGAGCCU	Cleavage
ghy-miR6113b	c50281.graph_c0	TMV resistance protein N	4	639	662	UGUUUCAAACAAAUCAUUGUAGUC	Cleavage
ghy-miR6113b	c12169.graph_c0	alcohol dehydrogenase	4.5	45	66	UGGCGUUUUCUUGAUUUUCUGG	Cleavage
ghy-miR6113b	c30442.graph_c0	uncharacterized protein	4.5	1542	1565	AAACCCUAGAGUUCUCGAAAUUUU	Cleavage
ghy-miR6113b	c30636.graph_c0	RING-H2 finger protein ATL73-like	4.5	1009	1029	UGAUG-GUUUUUGAGUUUCAAA	Cleavage
ghy-miR6113b	c34405.graph_c0	unnamed protein product	4.5	160	181	CGGUGGUUUUUAGGGUUUCAGA	Translation
ghy-miR6113b	c35264.graph_c0	Pentatricopeptide repeat-containing protein	4.5	4215	4236	CUUAGUGUUUUUGGGUUUCCGU	Cleavage
ghy-miR6113b	c39189.graph_c0	guanylate kinase 2	4.5	765	786	GGAUCUGUUCUUCGGUUUCAGU	Translation
ghy-miR6113b	c40766.graph_c0	uncharacterized protein	4.5	625	648	AUAUAGUUUUUGGGGAAAAUGGUC	Cleavage
ghy-miR6113b	c41367.graph_c0	unnamed protein product	4.5	910	932	UGAGGUGUCUUUUGGGUUUUAGA	Cleavage
ghy-miR6113b	c41635.graph_c0	N-alpha-acetyltransferase 35, NatC auxiliary subunit	4.5	1379	1400	CGCUUUGUUGUAGAGUUUCAGA	Translation
ghy-miR6113b	c43714.graph_c0	toll/interleukin-1 receptor (TIR) domain-containing protein	4.5	1511	1532	UGACGUGUUCCUAAGUUUCAGA	Cleavage
ghy-miR6113b	c43896.graph_c0	uncharacterized protein	4.5	701	722	AGAGGUGUGCUUGGGUGUUAGA	Cleavage
ghy-miR6113b	c43918.graph_c0	uncharacterized protein	4.5	809	832	CGUGCCAAGUCAGCAGACAAAUGA	Cleavage
ghy-miR6113b	c45707.graph_c0	PHR1-LIKE 2-like protein	4.5	358	379	UAUGUUGUUCUUCAGUUUUAGG	Translation
ghy-miR6113b	c46124.graph_c0	unnamed protein product	4.5	20	43	UCAAGGAAACAGAGCUCCGGUUGU	Translation
ghy-miR6113b	c47063.graph_c0	peroxisomal acyl-coenzyme A oxidase 1-like	4.5	313	334	UAGCGUGUUCUUGAGAAUCGGU	Cleavage
ghy-miR6113b	c47154.graph_c0	pentatricopeptide repeat-containing protein	4.5	4478	4499	CGACGAGUGCUUGAAUUUCGGG	Cleavage
ghy-miR6113b	c49753.graph_c0	uncharacterized protein	4.5	981	1002	CAUAAUGUUUUUGGGUUGCAGA	Cleavage
ghy-miR6113b	c49884.graph_c0	uncharacterized protein	4.5	2730	2750	AACGAGCUUUUUUCGUUCCAA	Cleavage
ghy-miR6113b	c68629.graph_c0	40S ribosomal protein S2	4.5	79	100	GGGUGUUUUCUAGAGUUUUAGU	Translation
ghy-miR6113b	c73206.graph_c0	Retrovirus-related Pol polyprotein from transposon TNT 1-94	4.5	68	89	CAACUUAUUCUUGAGUUUCAAG	Cleavage
ghy-miR6113b	c81332.graph_c0	RNA-directed DNA polymerase	4.5	49	70	CUAAGUGUUCUUGACCUUUAGA	Cleavage
ghy-miR6113b	c28450.graph_c1	tubulin-folding cofactor A	5	505	526	CGAUGCCGUCUUGAUUUUCAGA	Cleavage
ghy-miR6113b	c28548.graph_c0	membrane-anchored ubiquitin-fold protein 6 precursor	5	211	232	GGACAUGUUCUUGAGUUUGAAU	Cleavage
ghy-miR6113b	c33864.graph_c0	uncharacterized protein	5	397	418	UGACAUUUUCUGGGGUUUUAGG	Translation
ghy-miR6113b	c34315.graph_c0	Remorin, C-terminal	5	955	979	AUCAUCAUAACUUGACCAAGUCUUU	Cleavage
ghy-miR6113b	c36175.graph_c0	unnamed protein product	5	131	152	CGACGUGUUCUUAAGUUUCCGG	Cleavage
ghy-miR6113b	c39432.graph_c0	uncharacterized protein	5	84	107	CAACUUUUAUGCAAAUGUUGUUUU	Cleavage
ghy-miR6113b	c39623.graph_c0	hypothetical protein	5	903	923	CGUUGAGGUGUUGUGGAGUGA	Translation
ghy-miR6113b	c40279.graph_c0	uncharacterized protein	5	1165	1186	UUGCAUCGGUCAUGGUGGCGGC	Cleavage
ghy-miR6113b	c40564.graph_c0	uncharacterized protein	5	826	847	GGAGGUGUUCUUGGGCUUUGGC	Cleavage
ghy-miR6113b	c45259.graph_c0	hypothetical protein	5	1329	1352	AUUGACCAUAUCAUGCUUUUUCUU	Cleavage
ghy-miR6113b	c46017.graph_c0	hypothetical protein	5	1587	1608	UGACAUAUUUAUGAGUUUCGGA	Cleavage
ghy-miR6113b	c47129.graph_c0	unnamed protein product	5	1879	1902	GCUGCUUUAUUCUUAGUAGUAUUU	Cleavage
ghy-miR6113b	c47759.graph_c0	NUCLEAR FUSION DEFECTIVE 4	5	2061	2081	GGAUGUGUUUUU-AGUUUUGGA	Translation
ghy-miR6113b	c48038.graph_c0	unnamed protein product	5	1830	1853	AUUCUCGGAGUCGUGUUGGCC-AUU	Cleavage
ghy-miR6113b	c48507.graph_c0	unnamed protein product	5	1442	1465	AUCUUGAUGAUGAAGUCGGCAGUA	Cleavage
ghy-miR6113b	c48644.graph_c0	LRR receptor-like serine/threonine-protein kinase RPK2	5	1808	1829	AAUGGUGUUCUUGAGCUUCAAG	Cleavage
ghy-miR6113b	c49845.graph_c0	hypothetical protein	5	98	119	CGCCAUUUUCUUGAGUUUCGAG	Cleavage
ghy-miR6113b	c50246.graph_c0	hypothetical protein	5	3126	3147	UGACCUCUUUUUGAAUUUCAGC	Cleavage
ghy-miR6113b	c50417.graph_c0	unnamed protein product	5	2125	2146	UACAGUGUUCUUGAAUUUCACU	Cleavage
ghy-miR6118	c45863.graph_c0	hypothetical protein	2.5	841	864	UAGUUUUUCAAAUUUAACCUCAUU	Cleavage
ghy-miR6118	c49667.graph_c0	hypothetical protein	2.5	1368	1389	ACAGGGAAGGGUGGCCUCGGAU	Cleavage
ghy-miR6118	c30112.graph_c1	SMG7-like	3	3312	3333	GAAUGCAUGGGUGGCUUUGGAA	Cleavage
ghy-miR6118	c35098.graph_c0	WD repeat-containing protein 75	3	1759	1780	GAAGGAAUAGGUGGCCUUGUAA	Cleavage
ghy-miR6118	c46532.graph_c1	hypothetical protein	3	2951	2972	AGUGGAGUGGGUGGCCCUGGAG	Cleavage
ghy-miR6118	c46656.graph_c0	toll/interleukin-1 receptor (TIR) domain-containing protein	3	742	763	UGGGGAAUGGGUGGAAUCGGAA	Cleavage
ghy-miR6118	c48586.graph_c2	RNA-directed DNA polymerase	3	1430	1453	UGGAACUAGCUCCCACGUUUCAUU	Cleavage
ghy-miR6118	c12472.graph_c0	protein FAF-like	3.5	1026	1047	CAGGGGAUGGGUGGUCAUGGAG	Cleavage
ghy-miR6118	c22057.graph_c0	protein kinase-like domain, Concanavalin A-like lectin/glucanase domain protein	3.5	164	185	AUUGGAAGGGGUGGAUUUGGAA	Cleavage
ghy-miR6118	c25649.graph_c0	cellulose synthase-like protein D3	3.5	3921	3942	AUUGGAGCGGGUGGCCUUGAAA	Cleavage
ghy-miR6118	c25649.graph_c0	cellulose synthase-like protein D3	3.5	3921	3942	AUUGGAGCGGGUGGCCUUGAAA	Cleavage
ghy-miR6118	c42390.graph_c0	uncharacterized protein	3.5	1566	1587	UCAGUAAUUGGUGGCCUUGGAU	Cleavage
ghy-miR6118	c49204.graph_c0	receptor-like protein kinase FERONIA	3.5	616	637	GAGGGAAGGGGUGCUUUCGGAA	Cleavage
ghy-miR6118	c50186.graph_c0	receptor-like protein kinase	3.5	1981	2002	AUUGGAGUUGGUGGUUUUGGGA	Cleavage
ghy-miR6118	c23053.graph_c0	proline-rich receptor-like protein kinase PERK1	4	618	639	CUUGGAGUGGGUGGCGCCGGAG	Cleavage
ghy-miR6118	c25935.graph_c0	NSP-INTERACTING KINASE 1	4	721	742	UUAGGAAAAGGUGGUUUCGGAC	Cleavage
ghy-miR6118	c26479.graph_c0	hypothetical protein	4	130	151	AAAGGAACGGGUUGCUUUGGAG	Translation
ghy-miR6118	c37177.graph_c0	exocyst complex component	4	677	697	AGGUUUAUAAAGUUAUUCGUA	Cleavage
ghy-miR6118	c40206.graph_c0	serine/threonine-protein kinase CTR1	4	349	370	UCCUGAAUGGAUGGCCCCGGAA	Cleavage
ghy-miR6118	c42501.graph_c0	microfibrillar-associated protein 1-like	4	331	352	GGCUAGAUCGGUGGCCUUGGAA	Cleavage
ghy-miR6118	c44257.graph_c0	hypothetical protein	4	1767	1787	GUGGGGGGUACCUUGUUUUUG	Cleavage
ghy-miR6118	c45302.graph_c0	AFG1-like ATPase	4	812	833	UAAGGAGUGGGUGGCUGCCGAA	Cleavage
ghy-miR6118	c45544.graph_c2	hypothetical protein	4	456	477	CCGGAGAUGGGUGGUCCCGGGA	Cleavage
ghy-miR6118	c45994.graph_c0	unnamed protein product	4	22	45	CACUAUUUUAAGCAGCCAUUGUUG	Cleavage
ghy-miR6118	c46175.graph_c1	unnamed protein product	4	1040	1061	GGAGGAAAAGGUGGCCGUGGAA	Cleavage
ghy-miR6118	c46175.graph_c1	unnamed protein product	4	1040	1061	GGAGGAAAAGGUGGCCGUGGAA	Cleavage
ghy-miR6118	c47649.graph_c0	LOB domain-containing protein 37-like	4	406	427	AUGGGGUUGUGUGGUCUUGGAA	Cleavage
ghy-miR6118	c48397.graph_c0	hypothetical protein	4	656	676	CCCGGAAAAAUGGUGGGGUAU	Cleavage
ghy-miR6118	c48670.graph_c0	unnamed protein product	4	2259	2279	GAUUUUGGCAUGGCUAAGUUA	Cleavage
ghy-miR6118	c49451.graph_c0	Disease resistance protein	4	677	698	UGGGGCAUGGGUGGCGUGGGAA	Cleavage
ghy-miR6118	c50080.graph_c1	G-type lectin S-receptor-like serine/threonine-protein kinase	4	597	617	CCGGAAUGAAGUUUGGCCGGA	Cleavage
ghy-miR6118	c57741.graph_c0	Potassium transporter 3	4	407	428	UUUGUGUUGGGUGGUUUUGGAA	Cleavage
ghy-miR6118	c84440.graph_c0	unusual floral organs protein	4	141	163	CUUUGUGGUCGUCAUGAUUGUCG	Cleavage
ghy-miR6118	c11382.graph_c0	aldehyde oxidase GLOX-like	4.5	1569	1590	CUUGGUCUGGGUGGCCGUGGAG	Cleavage
ghy-miR6118	c13797.graph_c0	HOMOLOG OF MAMMALIAN LYST-INTERACTING PROTEIN 5	4.5	476	496	GUUGGAA-GGGUAGUUUCGGAA	Translation
ghy-miR6118	c23588.graph_c0	cytochrome b561 and DOMON domain-containing protein	4.5	815	835	CGGAAUCGCUCUCUUCUGUCU	Cleavage
ghy-miR6118	c24828.graph_c0	psbP domain-containing protein 4	4.5	1270	1290	UAAGGAAUGG-UGGCUUCGGAU	Cleavage
ghy-miR6118	c25743.graph_c0	Concanavalin A-like lectin/glucanase	4.5	573	594	GUGGGGAAGGGCGGUUUUGGAA	Translation
ghy-miR6118	c34167.graph_c0	MDIS1-interacting receptor like kinase 2-like	4.5	76	97	AUUGGAAAGGGAGGAUUCGGAA	Translation
ghy-miR6118	c37356.graph_c0	unnamed protein product	4.5	630	651	GUCUGAGUUGGUGGCGUCGGAG	Cleavage
ghy-miR6118	c38720.graph_c0	Lipase, class 3	4.5	293	316	UUCAACUACAUCAUUCCAGUUUAU	Translation
ghy-miR6118	c42100.graph_c0	L-galactono-1,4-lactone dehydrogenase	4.5	879	900	UGUGGACUGGGUGCCUUUGGGG	Cleavage
ghy-miR6118	c42446.graph_c0	hypothetical protein	4.5	885	906	AUUGUGAUGGGUGUUUUUGGAA	Cleavage
ghy-miR6118	c42957.graph_c0	uncharacterized protein	4.5	1406	1429	AAUUCACUUCCACUUGCAAAUGCU	Cleavage
ghy-miR6118	c43407.graph_c0	uridine nucleosidase 2	4.5	620	641	CAUGGGGUGGAUGGACUUGGAA	Cleavage
ghy-miR6118	c45477.graph_c2	membrane-associated kinase regulator 1	4.5	912	935	GGCACCGGAACCGGAACCGGAACC	Cleavage
ghy-miR6118	c47058.graph_c0	RTE1-HOMOLOG-like	4.5	1028	1049	UGCUUGCAUAUGUAGGAAUACA	Translation
ghy-miR6118	c48448.graph_c0	root UVB sensitive 2	4.5	779	800	CUUGAAAUGGCCGGCCUUGGAA	Translation
ghy-miR6118	c49425.graph_c1	carnosine N-methyltransferase-like	4.5	1267	1288	AUUAGGAAGGCUGGCCUUGGAA	Cleavage
ghy-miR6118	c49433.graph_c0	KIN17-like protein	4.5	2673	2694	GUUAAUGUUUAUGAAAUUUUAU	Cleavage
ghy-miR6118	c72013.graph_c0	unnamed protein product	4.5	117	138	AAGCAAAAGGGUGGCCUUGGAC	Cleavage
ghy-miR6118	c19841.graph_c0	hypothetical protein	5	253	274	ACACAGAUGGGUGCCCUUGGAG	Cleavage
ghy-miR6118	c25216.graph_c0	purine permease 5	5	921	944	AAUGGGGUUGGGGUGGCUUUGGAG	Cleavage
ghy-miR6118	c30749.graph_c0	hypothetical protein	5	1797	1819	AAGGGAAUGGAGUGGUUUUGGGA	Cleavage
ghy-miR6118	c34006.graph_c0	hypothetical protein	5	1374	1395	GUGGGGAAGGCUGGCAUCGGAG	Cleavage
ghy-miR6118	c34563.graph_c1	oligopeptide transporter 7	5	159	180	UUUGGAAAAGGUAGCCUGGGAA	Translation
ghy-miR6118	c36595.graph_c0	accelerated cell death 11	5	177	198	UAGCCAAUGGGUGGGUUUGGGA	Cleavage
ghy-miR6118	c38960.graph_c0	uncharacterized protein	5	581	602	GUGUGGGUGGGUGGAAUCGGAA	Cleavage
ghy-miR6118	c39022.graph_c0	glutamate receptor 2.7-like	5	1112	1133	GUUGAUGAGGGGGGCCUCGGAA	Translation
ghy-miR6118	c39112.graph_c0	unnamed protein product	5	383	405	GUUGGGUGUGGGUGGUUUUGGGA	Cleavage
ghy-miR6118	c39459.graph_c0	uncharacterized protein	5	972	993	GUUUGGGUGGGUGGACUUGGAU	Cleavage
ghy-miR6118	c41012.graph_c0	mg2+ transporter protein, CorA-like/Zinc transport protein ZntB	5	1266	1287	AUUGGAAGGGGUGGCAUUGUGA	Cleavage
ghy-miR6118	c41151.graph_c0	Cation efflux protein	5	859	880	UAGUAAAUGGGUGGCAUCGGUA	Cleavage
ghy-miR6118	c41740.graph_c0	uncharacterized protein	5	1040	1061	GGUGGAGAGGGUGGGCUAGGGA	Cleavage
ghy-miR6118	c42827.graph_c0	FAD-dependent pyridine nucleotide-disulfide oxidoreductase	5	477	498	UUUGGAAAUGGUGUUCUUGGGA	Cleavage
ghy-miR6118	c43972.graph_c0	ALP1-like protein	5	817	838	GCGGAAAUGGGUGGCCUCGUCG	Cleavage
ghy-miR6118	c44188.graph_c0	vacuolar cation/proton exchanger 3-like	5	1672	1695	ACAAUUAAGUGACUAUUGAGUAUA	Cleavage
ghy-miR6118	c44968.graph_c0	P-loop NTPase domain-containing protein LPA1 homolog 2-like	5	1309	1332	AGAUUUGUCGACGUUUGUGUUGUU	Cleavage
ghy-miR6118	c45153.graph_c1	uncharacterized protein	5	211	232	GUUGAUGUGGGUGGACUCGGAC	Cleavage
ghy-miR6118	c45295.graph_c0	protein S-acyltransferase 1	5	924	947	UUUUUUUUUUGUUUUGGUAAUUUU	Cleavage
ghy-miR6118	c45999.graph_c0	stem-specific protein TSJT1-like	5	3834	3855	ACUGGAAUGAGUGUUUUCGGAC	Cleavage
ghy-miR6118	c47322.graph_c0	Concanavalin A-like lectin/glucanase	5	2599	2620	AUUGGAAACGGUGGGUUUGGAG	Cleavage
ghy-miR6118	c48450.graph_c0	unnamed protein product	5	148	169	GUCGGGGAGGGUGGAUUUGGGA	Cleavage
ghy-miR6118	c48856.graph_c0	cytochrome P450	5	643	664	UGUUGAGUGGGUUGGUUCGGAA	Translation
ghy-miR6118	c48872.graph_c1	hypothetical protein	5	460	483	CCAAAGAUGAAGAUAAUUUCUUUG	Cleavage
ghy-miR6118	c49444.graph_c3	heptahelical transmembrane protein 1-like	5	768	788	UUGGAUAUAGAGUUUGAUUGG	Cleavage
ghy-miR6118	c49758.graph_c0	hypothetical protein	5	1878	1902	CCAUAGGGAUUAAGAAUAGGGUUUU	Translation
ghy-miR6118	c49765.graph_c0	uncharacterized protein	5	127	148	AAAUUAUGUCUUUCGUGGAAGA	Cleavage
ghy-miR6118	c56084.graph_c0	RNA-directed DNA polymerase	5	813	834	UUUGGAACGGGUGACCAUGGGA	Cleavage
ghy-miR6118	c65782.graph_c0	SPEAR3-like	5	450	471	UGUGGGAUUGGUGCCCUUGCAA	Cleavage
ghy-miR6118	c7594.graph_c1	Disease resistance protein	5	148	169	UAUGGCAUGGGUGGUAUUGGUA	Cleavage

## Sheet: Table S5
Supplementary Table S5. Identified and annotated target transcripts for the novel miRNAs in gerbera
miR name	transcript	transcript annotation	expectation score	target start	target end	target aligned fragment	inhibition
ghy-miRn1	c43474.graph_c0	Pentatricopeptide repeat-containing protein	2.5	2216	2239	AAAGCAUAUCAACCCAGUUAUUAU	Cleavage
ghy-miRn1	c12151.graph_c0	Uncharacterized protein	2.5	218	241	GGCCAAUAACAAACUAGUUACCAC	Cleavage
ghy-miRn1	c49745.graph_c1	aldehyde dehydrogenase family 2 member B4	3	3068	3091	UCCGGUUGUCAAACCAGCUACCAU	Cleavage
ghy-miRn1	c46874.graph_c0	hypothetical protein	3	270	293	GAAUCAUAUCAAACUAGUUUUUAU	Cleavage
ghy-miRn1	c50051.graph_c1	low-temperature-induced cysteine proteinase-like	3	2880	2903	UAGAUUUAUCGAAUCGGUUACUAU	Cleavage
ghy-miRn1	c48972.graph_c0	MADS-box protein, GDEF2	3	1703	1726	CUACAAUGUCAUAUCAGUUGCCAU	Cleavage
ghy-miRn1	c42153.graph_c0	Uncharacterized protein	3	955	978	GUUUUGUAUCAAAACAGUUAUCGU	Translation
ghy-miRn1	c80394.graph_c0	uncharacterized protein	3	170	193	UAAGUAUAUCAUACUGGUUGCCAU	Cleavage
ghy-miRn1	c38256.graph_c0	unnamed protein product	3	35	58	CACGUCUAUCAAACCAGUUACAGU	Cleavage
ghy-miRn1	c48279.graph_c0	bZIP transcription factor 12-like	3.5	1587	1610	AUUUUGUAUAAAACCAGAUAUCAU	Cleavage
ghy-miRn1	c42249.graph_c0	G-protein beta WD-40 repeat-containing protein	3.5	571	594	CUUGUCUGUCGAACCAGUUGCCAA	Cleavage
ghy-miRn1	c42146.graph_c0	pleiotropic drug resistance protein 2-like	3.5	4459	4482	CUUUGGUAACAAAUUAGUUAUUAU	Cleavage
ghy-miRn1	c54160.graph_c0	protein kinase-like domain-containing protein	3.5	282	305	GUUUCAUUGCAAACUAGUUACUGU	Cleavage
ghy-miRn1	c90708.graph_c0	sulfite oxidase	3.5	114	137	AUUUUCUAUCAAACCAGUUAUAGU	Cleavage
ghy-miRn1	c42745.graph_c0	Zinc finger, RING-CH-type	3.5	1259	1283	UUUUCAUAAUCAAAUUAGUUAUCAU	Cleavage
ghy-miRn1	c48896.graph_c1	Armadillo-type fold	4	812	835	ACGUUAUCUUAGAUCAGUUACUAA	Cleavage
ghy-miRn1	c40120.graph_c0	hypothetical protein	4	367	390	AUGUUGUAUUAAACCAGUAAACAU	Cleavage
ghy-miRn1	c34655.graph_c0	hypothetical protein	4	409	432	UUUUAGUGUUGGGCCAGUUGCUAU	Cleavage
ghy-miRn1	c34586.graph_c0	hypothetical protein	4	271	294	GUUUGAUAUCCAACCAUGUACCAU	Cleavage
ghy-miRn1	c48563.graph_c1	KOW-like protein	4	39	62	GUUUUAUUUCAACUUAGUUAUCAU	Cleavage
ghy-miRn1	c23598.graph_c0	lamin-like protein	4	63	86	CUUUUACAUCAACCCAGUCACCAU	Cleavage
ghy-miRn1	c43751.graph_c0	MICRORCHIDIA 2-like	4	1706	1729	UGCUUGUCUUGAACCCGUUACCAU	Cleavage
ghy-miRn1	c47732.graph_c0	TMV resistance protein N-like	4	3576	3599	UCUUGAUGUUAAAUCAGUAGUCAU	Cleavage
ghy-miRn1	c47739.graph_c0	Uncharacterized protein	4	1542	1565	CAGCUAUGUCAAUCCAGUUACUGA	Cleavage
ghy-miRn1	c47188.graph_c0	Uncharacterized protein	4	1782	1805	AAUGUGUAUUGAACUAGUUGCUAA	Cleavage
ghy-miRn1	c43828.graph_c0	Uncharacterized protein	4	997	1020	GAAUUAUAUCAAACACGUUAUCGU	Translation
ghy-miRn1	c30667.graph_c0	Uncharacterized protein	4	895	918	UGAUUUUGUUGAAUCAGUUGCUAU	Cleavage
ghy-miRn1	c46150.graph_c0	WD repeat-containing protein WRAP73	4	1708	1731	AUUUUGUAUCAAACCAGUCCUCAU	Cleavage
ghy-miRn1	c33592.graph_c0	cytochrome c, class IA/ IB	4.5	994	1017	UUUAUAUGUCAAAUUAGUUGUUCU	Cleavage
ghy-miRn1	c22906.graph_c0	hypothetical protein	4.5	1528	1551	AUUUUAUCCCAAACCAGUUGGUAU	Cleavage
ghy-miRn1	c48371.graph_c0	kelch domain-containing protein 4	4.5	569	592	UUUUGAUGUCAAACAGGUUACUUU	Translation
ghy-miRn1	c46424.graph_c3	KNOX1-like protein	4.5	537	560	UAAUUAUAUCAAGCUAGAUGGCAU	Cleavage
ghy-miRn1	c39730.graph_c0	Non-heme dioxygenase N-terminal domain-containing protein	4.5	836	859	GUUUAACGGCAAACCAUUUGCCAU	Cleavage
ghy-miRn1	c46647.graph_c1	ras-related protein RABD2c	4.5	567	590	AUUGUGUAUCAAACUAAUUGUUGU	Cleavage
ghy-miRn1	c26374.graph_c0	Retrovirus-related Pol polyprotein from transposon TNT 1-94	4.5	1413	1436	AGGUUAUGUCAAAGUAGAUAUCAU	Translation
ghy-miRn1	c48793.graph_c0	seed imbibition 2	4.5	3743	3766	UCUUUGUAAUAAACAAGUUACCAG	Translation
ghy-miRn1	c50222.graph_c1	Uncharacterized protein	4.5	1653	1676	AUUUUGUUUCUAAACAGUUAUCAU	Translation
ghy-miRn1	c47544.graph_c1	Uncharacterized protein	4.5	982	1005	GAUUUAUAACAAGUCAGUCAUUAU	Cleavage
ghy-miRn1	c48025.graph_c0	1-phosphatidylinositol-3-phosphate 5-kinase FAB1D	5	1142	1165	CCUUUAUAAUAAACCGGUCAUCAA	Cleavage
ghy-miRn1	c38102.graph_c0	ankyrin repeat-containing protein	5	1757	1780	GCUUUUUAUCAUAUCAGAUGCCAU	Cleavage
ghy-miRn1	c57374.graph_c0	fasciclin-like arabinogalactan protein 19	5	586	609	GUUAUUUGUUAAGUCGGUUGUCGU	Cleavage
ghy-miRn1	c38009.graph_c0	G-type lectin S-receptor-like serine/threonine-protein kinase	5	2049	2072	AAUUUAAAUUAAACAAGUUAUAAU	Translation
ghy-miRn1	c39639.graph_c0	hydroxyproline O-galactosyltransferase HPGT1	5	595	618	GCUUUGUAUCAAAGCACUUAUCAA	Translation
ghy-miRn1	c40662.graph_c0	kinetochore protein NUF2	5	20	43	UCUUUAUAUUAAUUGGGUUAUCAU	Translation
ghy-miRn1	c72762.graph_c0	mitochondrial protein	5	153	176	GGUUUAAAUCAAGCUUGUUGCCAA	Cleavage
ghy-miRn1	c48049.graph_c1	O-fucosyltransferase 35	5	1392	1415	GUUUUCUUUCAGGUUAGUUAUUAU	Cleavage
ghy-miRn1	c31685.graph_c0	pectinesterase	5	1283	1306	UGUUUAUAGCGAGCGAGUUACUAA	Translation
ghy-miRn1	c22121.graph_c0	Uncharacterized protein	5	2263	2286	UUCUUGUGUUAAAUUAUUUACCAA	Cleavage
ghy-miRn1	c47261.graph_c0	zf-CCHC domain-containing protein/UBN2 domain-containing protein	5	117	140	UAUUUGUGACAAGUCUGUUAUCAU	Cleavage
ghy-miRn2	c42297.graph_c0	cytochrome P450 86A22	1	452	475	CAUCCUUCUACACUCAUAAACACU	Cleavage
ghy-miRn2	c23349.graph_c0	glucose-6-phosphate dehydrogenase	2	63	86	UAAAUAACACUGUAAGAUCGACAA	Cleavage
ghy-miRn2	c44860.graph_c0	oxysterol-binding protein-related protein 4C-like	2	36	59	CAUCUUUAUAUACUCACAAACACU	Cleavage
ghy-miRn2	c36172.graph_c0	calmodulin-binding receptor-like cytoplasmic kinase 3	3	1625	1648	UAACGAAUAUGGUAAGAUCCACAG	Cleavage
ghy-miRn2	c43950.graph_c0	defensin-like protein 19	3	516	540	CUUUCUCCCAACACUCACAAACACU	Cleavage
ghy-miRn2	c30218.graph_c0	protein LIFEGUARD 2	3	524	547	ACGUGAACAAAGUAAGACUCACGA	Cleavage
ghy-miRn2	c30124.graph_c0	unnamed protein product	3	616	639	UACGAAACACUGUAAGAUCUGAAA	Cleavage
ghy-miRn2	c44174.graph_c0	violaxanthin de-epoxidase	3	1625	1648	UUUCAAACAUUGUAAGAUUCAAAA	Cleavage
ghy-miRn2	c15761.graph_c0	(R)-mandelonitrile lyase-like	3.5	272	295	UUGCUGGCAAUGUAGGGCCCACGA	Cleavage
ghy-miRn2	c43771.graph_c0	calcium-dependent protein kinase 16	3.5	1504	1527	CUACAAACUCUGUGAAAUCCACAA	Cleavage
ghy-miRn2	c41621.graph_c0	hypothetical protein	3.5	869	892	AGAUGAACACUGUAGAACCCACUA	Cleavage
ghy-miRn2	c33349.graph_c0	hypothetical protein	3.5	24	47	UAAUGAACGGUGUAAGAACCAUAA	Cleavage
ghy-miRn2	c48389.graph_c0	L-type lectin-domain containing receptor kinase S.5	3.5	913	938	UCAUCUUCUUAAUACUCACAAACACU	Cleavage
ghy-miRn2	c48395.graph_c0	protein GRAVITROPIC IN THE LIGHT 1-like	3.5	461	484	CGCCAAACACCGUAACACCCACAC	Cleavage
ghy-miRn2	c30899.graph_c0	RNA-directed DNA polymerase	3.5	3493	3516	GAAAGAAUAGGUUCAAAGCACCAA	Cleavage
ghy-miRn2	c33508.graph_c0	unnamed protein product	3.5	1522	1545	CUUCCUAACACUCACAAAUGGUGU	Cleavage
ghy-miRn2	c12230.graph_c0	F-box protein	4	637	660	UCAUCAUUACUGUAAUAUCCACAG	Cleavage
ghy-miRn2	c49139.graph_c0	F-box protein PP2-B12	4	1063	1086	UAGCUUUUGGCUUAACGGUAUUUA	Cleavage
ghy-miRn2	c39374.graph_c0	hypothetical protein	4	74	97	UUAUUAGCACUUUAAGAUCCAAAA	Cleavage
ghy-miRn2	c42634.graph_c0	methyl-CpG-binding domain-containing protein 9	4	4078	4098	UGGAAUAUUGGGAGUUAGGCA	Cleavage
ghy-miRn2	c45958.graph_c0	rhodanese-like domain-containing protein 8	4	1592	1615	CACAAAUAAUGUGAGACUUACAUC	Translation
ghy-miRn2	c39005.graph_c0	RNA-directed DNA methylation 4	4	1581	1604	CACAAACAACGUGGGACCCACAUC	Cleavage
ghy-miRn2	c48893.graph_c0	Transposon Ty3-G Gag-Pol polyprotein	4	2026	2049	GAUUGUUGUUUUUCUGUUUAUUAG	Cleavage
ghy-miRn2	c64567.graph_c0	Uncharacterized protein	4	11	34	CCACGACCUCUGUAGGACCCACCA	Cleavage
ghy-miRn2	c54787.graph_c0	unnamed protein product	4	459	481	AGACAAGC-CUGUAGGAUCCACAG	Cleavage
ghy-miRn2	c49984.graph_c0	acyl-activating enzyme 17	4.5	2782	2805	UCACAAACUUUAUGAGACCCACAU	Cleavage
ghy-miRn2	c43560.graph_c0	cytochrome P450 711A1	4.5	173	193	AUUAAAGUAUAAUGGUUUAAG	Cleavage
ghy-miRn2	c49073.graph_c1	DNA mismatch repair protein MSH5	4.5	964	987	GCAGUGUCCAAGGCUUGCAGACAG	Cleavage
ghy-miRn2	c12334.graph_c0	E3 ubiquitin-protein ligase SINAT5-like	4.5	243	267	AUACAAAUGAAUGUGGGACCCACAA	Cleavage
ghy-miRn2	c11941.graph_c0	envelope ADP,ATP carrier protein	4.5	365	388	GUACAAAUUUCGUAAGAUCCAUAG	Cleavage
ghy-miRn2	c50142.graph_c0	hypothetical protein	4.5	270	293	GUGCGAGUAUUAUAAGAUCUGCAA	Cleavage
ghy-miRn2	c38696.graph_c0	hypothetical protein	4.5	405	428	GCACAAACAUUGGAAAAUUCACAA	Cleavage
ghy-miRn2	c56044.graph_c0	nicotinamide adenine dinucleotide transporter 1	4.5	286	309	GCGCAACCACAGUAGAACCCACAG	Cleavage
ghy-miRn2	c49670.graph_c1	protein TOPLESS	4.5	3309	3332	AUGCAAACACUUUAAGAUCUUUAA	Cleavage
ghy-miRn2	c36394.graph_c0	serine/threonine protein kinase IRE4	4.5	1803	1826	CUACGAAUACUCCAAGAUCCGCAA	Cleavage
ghy-miRn2	c35151.graph_c0	Uncharacterized protein	4.5	1707	1731	CGGAAUCGGAACCGGAACCGGAACU	Cleavage
ghy-miRn2	c44491.graph_c0	Uncharacterized protein	4.5	319	343	CAAUCAGAGUUGUGUUGGCUCCAUU	Cleavage
ghy-miRn2	c49803.graph_c2	Uncharacterized protein	4.5	802	825	UUUUAAAGUGAAAUGUGAGUUUUU	Cleavage
ghy-miRn2	c11985.graph_c0	Uncharacterized protein	4.5	666	689	CGACAAGCACGGUAAGAUCUAUCA	Cleavage
ghy-miRn2	c44383.graph_c1	60S ribosomal protein L14-2-like	5	943	967	UCACAAAACAUUGUGGGGCUCACGA	Cleavage
ghy-miRn2	c48208.graph_c0	autophagy-related protein 18f	5	1977	2000	UUACAAACGCAGUAAGAUACCCAA	Cleavage
ghy-miRn2	c77005.graph_c0	Basic-leucine zipper domain-containing protein	5	16	39	AAACAAAUAUUGUAUUACCCAUAG	Translation
ghy-miRn2	c44899.graph_c0	DNA (cytosine-5)-methyltransferase 1B-like	5	2629	2649	UUUUGAAGAACGGGUUUUCUU	Cleavage
ghy-miRn2	c35488.graph_c0	eukaryotic translation initiation factor 2 subunit alpha homolog	5	87	111	CCACAUAACAUUGUAAGAUUUGUAA	Cleavage
ghy-miRn2	c39244.graph_c0	Filamin/ABP280 repeat-like protein	5	332	352	GAGAUUGAGCUUGCAGUUUCU	Translation
ghy-miRn2	c12288.graph_c0	G-type lectin S-receptor-like serine/threonine-protein kinase	5	20	43	UCAUAAAAAAUGUAAAACCUACAU	Cleavage
ghy-miRn2	c18805.graph_c0	hypothetical protein	5	85	108	CACAAAUAAUGUGGGACCCACACA	Cleavage
ghy-miRn2	c73600.graph_c0	hypothetical protein	5	32	54	AUACGAGCACUG-AGGACCCACAU	Cleavage
ghy-miRn2	c52526.graph_c0	protein CHROMOSOME TRANSMISSION FIDELITY 7	5	23	46	UCAUAAACACUGUAAGGUUUAUCU	Cleavage
ghy-miRn2	c48270.graph_c0	protein translocase subunit SecA	5	1562	1582	AGGUCUCUAGGGAGCUAGACA	Cleavage
ghy-miRn2	c45624.graph_c0	sister chromatid cohesion 1 protein 2	5	1824	1847	AUGAGGCUCCAGGCUCGUGGGAGG	Cleavage
ghy-miRn2	c49810.graph_c3	Uncharacterized protein	5	2382	2405	UCAUAGAAACUAUAAGAACUACAA	Cleavage
ghy-miRn2	c31244.graph_c0	Uncharacterized protein	5	589	612	UCUCAAGCAUUGUAAGAAUUAUAU	Cleavage
ghy-miRn2	c42689.graph_c0	zinc finger BED domain-containing protein RICESLEEPER 1-like	5	1113	1136	GGACAAAUAUUUUAAAACCCACAU	Cleavage
ghy-miRn3	c40894.graph_c0	hypothetical protein	1.5	999	1022	AAAAACAAAUAAAGUCGGGUCCAU	Cleavage
ghy-miRn3	c41200.graph_c0	Uncharacterized protein	1.5	84	107	UUUUUCAAAUUAUUUACAGUUCGU	Cleavage
ghy-miRn3	c48027.graph_c0	Retrovirus-related Pol polyprotein from transposon TNT 1-94	2	87	110	GGGCAUAAUUAAAGUCGAGUCUAU	Cleavage
ghy-miRn3	c12676.graph_c0	myosin heavy chain	2.5	523	546	UUUGCAAAGUAAAGUCAAGUCCAU	Cleavage
ghy-miRn3	c56337.graph_c0	Uncharacterized protein	2.5	140	163	UUCAUCAUGUGAAGUUGAGUUCAU	Cleavage
ghy-miRn3	c46889.graph_c0	Uncharacterized protein	2.5	2045	2068	CUAAGUGUUUGUUCCAAAUAAAAU	Cleavage
ghy-miRn3	c40301.graph_c0	casein kinase 1-like protein HD16	3	125	148	CAAUUCAAGUAGAGUUGAGCCUAU	Cleavage
ghy-miRn3	c50149.graph_c0	acyl-activating enzyme 1	3.5	1560	1583	GUGUUCAAGUAAAGUUGAGAGCAU	Cleavage
ghy-miRn3	c44109.graph_c0	formin-like protein 14	3.5	2014	2037	ACAAUUAAAUGAGGUUGGGUCCAU	Cleavage
ghy-miRn3	c45961.graph_c0	mitogen-activated protein kinase NTF3-like protein	3.5	1998	2021	CAACACAAGUAAAGACCAGUUCAU	Translation
ghy-miRn3	c92964.graph_c0	plant intracellular Ras-group-related LRR protein 9-like	3.5	135	158	CGGCCCGAGUGGAGUCGAGUAUAU	Cleavage
ghy-miRn3	c50329.graph_c0	Uncharacterized protein	3.5	1	23	UUCUUGCAACUGUGACAUCAUUU	Cleavage
ghy-miRn3	c47376.graph_c1	cellulose synthase-like protein G3	4	1813	1834	AUCAUUUUAUGUAACAUUUGAA	Cleavage
ghy-miRn3	c47376.graph_c1	cellulose synthase-like protein G3	4	1813	1834	AUCAUUUUAUGUAACAUUUGAA	Cleavage
ghy-miRn3	c44113.graph_c0	gibberellin 3-beta-dioxygenase 1-like	4	1436	1458	AUGGUUAAG-AGGGUCGAGUCCGU	Cleavage
ghy-miRn3	c41661.graph_c0	SIEVE ELEMENT OCCLUSION B-like	4	586	609	CCAAUUCAGUAUGGUCGGGUCCAU	Cleavage
ghy-miRn3	c31005.graph_c0	Uncharacterized protein	4	1180	1203	UUUUUCGAGUAUAUUCGAGUCUAU	Translation
ghy-miRn3	c21361.graph_c0	Uncharacterized protein	4	799	822	CCGGUCAACAAAAGACGAGUUCAU	Translation
ghy-miRn3	c46487.graph_c2	uncharacterized protein	4	3030	3053	UUAGACAAGGAAAGUUGAGUAUGU	Cleavage
ghy-miRn3	c29930.graph_c1	unnamed protein product	4	231	254	GAUAUCGAGUAAGGUUGAGUCGAA	Cleavage
ghy-miRn3	c48579.graph_c0	unnamed protein product	4	315	338	UGCUUCAAGUGGAAUUGAGUCCAA	Translation
ghy-miRn3	c20408.graph_c0	BTB/POZ domain-containing protein	4.5	470	492	CGAGCCAAG-AAAGUCGGGUUCUU	Cleavage
ghy-miRn3	c65521.graph_c0	dehydrogenase/reductase SDR family member FEY-like	4.5	896	919	CUAAAGAAGUAAGGUCGAGUUCCA	Cleavage
ghy-miRn3	c46504.graph_c1	derlin-1-like	4.5	1652	1675	UUUUUUUUUACACUUGUAAAUAGU	Cleavage
ghy-miRn3	c50315.graph_c0	geraniol 8-hydroxylase-like	4.5	1652	1675	UGGGUUUCGUGAAGUCGAGUUCAA	Cleavage
ghy-miRn3	c50142.graph_c0	hypothetical protein	4.5	270	293	GUGCGAGUAUUAUAAGAUCUGCAA	Cleavage
ghy-miRn3	c11977.graph_c0	hypothetical protein	4.5	250	273	UGAAGCAAGUAAAAUCGAGUUGAA	Translation
ghy-miRn3	c50742.graph_c0	non-functional NADPH-dependent codeinone reductase 2	4.5	323	343	CUCCCUAUAGAACGGAAUCUC	Cleavage
ghy-miRn3	c45672.graph_c0	Poly(ADP-ribose) glycohydrolase	4.5	976	999	ACUUAAAAUGUGAUAUCAGAUUUA	Cleavage
ghy-miRn3	c48897.graph_c1	potassium transporter	4.5	738	761	CAUGUCAAUUAAGGUUGAAUCCAG	Cleavage
ghy-miRn3	c46882.graph_c1	Transposon TX1 uncharacterized 149 kDa protein	4.5	1689	1712	GAUGUCGGGUCAGGUCGGGUCCUU	Cleavage
ghy-miRn3	c46565.graph_c0	Uncharacterized protein	4.5	1354	1380	UGGAUCUAGGGCUAAAGUCGAGUUCAU	Cleavage
ghy-miRn3	c45298.graph_c0	Uncharacterized protein	4.5	2540	2563	UGAUUCGAGUGACGUUGGGUCCAG	Cleavage
ghy-miRn3	c25761.graph_c2	BOI-related E3 ubiquitin-protein ligase 2	5	1263	1286	UGAGAAAAGUAAAAUUGAUUUCAU	Translation
ghy-miRn3	c85895.graph_c0	hypothetical protein	5	14	37	UGAUUAAAGUAUAGUUGAGUUCUU	Cleavage
ghy-miRn3	c33269.graph_c0	hypothetical protein	5	1356	1379	CGGGUUAUGUAAAGUUGGGAUUAU	Cleavage
ghy-miRn3	c40978.graph_c0	hypothetical protein	5	891	909	UGUUGACCCGAGAUUGUUG	Translation
ghy-miRn3	c21945.graph_c0	hypothetical protein	5	68	91	GUAGUUCAGUAACGUCGAGGCCGU	Cleavage
ghy-miRn3	c52271.graph_c0	hypothetical protein	5	182	205	GAAGUCGGGUCAAGUCGAGGCUAA	Cleavage
ghy-miRn3	c29061.graph_c0	hypothetical protein	5	272	295	GGAGACUAGUGAAGCUGAGUUCAC	Translation
ghy-miRn3	c44915.graph_c1	LON peptidase N-terminal domain and RING finger protein 1	5	361	384	GGAAUCAAGGAGAUUCGGGUUCAA	Translation
ghy-miRn3	c49885.graph_c0	nuclear poly(A) polymerase 4-like	5	3166	3189	AUGGUUGUGUGGAGUUGGGUUUAU	Cleavage
ghy-miRn3	c35681.graph_c0	protein HOTHEAD-like	5	91	113	UUCAUUCGUUUAUAACAUUUUUC	Cleavage
ghy-miRn3	c43660.graph_c0	Retrovirus-related Pol polyprotein from transposon TNT 1-94	5	1025	1048	UGAGGCAAGUUAUGUCGGGAUCAU	Cleavage
ghy-miRn3	c78875.graph_c0	strictosidine beta-D-glucosidase	5	28	51	CAAGUCUAGGAAGGUCGAGGCCAG	Cleavage
ghy-miRn3	c40610.graph_c0	UDP-glucuronosyl/UDP-glucosyltransferase	5	1013	1036	AUGGUUAAGUGAAGACGGGUUCGA	Translation
ghy-miRn3	c48762.graph_c0	Uncharacterized protein	5	1654	1677	CGCUUCAAGAAAUGACGAGUCUGU	Translation
ghy-miRn3	c45530.graph_c0	Uncharacterized protein	5	2993	3016	UGUAUUAAAAUAAUCAUCGUACUU	Cleavage
ghy-miRn3	c22431.graph_c0	unnamed protein product	5	253	276	AAAGUCAAGUCAAGUCAAGUCAAC	Cleavage
ghy-miRn3	c46367.graph_c0	unnamed protein product	5	1169	1191	GGAGUUA-GAAAAGUCGGGUCCAA	Cleavage
ghy-miRn4	c47652.graph_c0	spastin	2	878	901	ACAAUUACUAGAUCAUCAGAGUUU	Cleavage
ghy-miRn4	c38642.graph_c0	unnamed protein product	2	568	591	UACAUUGCCCAGUUAUCAGGGUUU	Cleavage
ghy-miRn4	c48630.graph_c0	hypothetical protein	2.5	2018	2040	AAGAGUGCUCAUCAUCAUUGCUU	Cleavage
ghy-miRn4	c56511.graph_c0	Retrovirus-related Pol polyprotein from transposon RE2	2.5	183	206	UCGCUUGCCCAAUCGUCAUAGUUU	Cleavage
ghy-miRn4	c39686.graph_c0	ARF guanine-nucleotide exchange factor GNOM-like	3	1016	1039	UACGGUACCCAGUAGUCAGGGUUU	Translation
ghy-miRn4	c87411.graph_c0	MICOS complex subunit MIC60	3	127	150	AUUUUUACUCAAUUGUCAGAGUCU	Cleavage
ghy-miRn4	c42509.graph_c0	5'-adenylylsulfate reductase-like 5	3.5	578	601	CGUGUUAACUAAUCAUUAUAGUUU	Cleavage
ghy-miRn4	c44778.graph_c0	BRCA1-associated protein-like	3.5	327	347	GGCGAAGUACAAGGGUUUAAG	Cleavage
ghy-miRn4	c45876.graph_c0	calcium/calmodulin-regulated receptor-like kinase 2	3.5	476	499	CUGAUUUAGCAAUCAUCGGAGUUU	Cleavage
ghy-miRn4	c55201.graph_c0	hypothetical protein	3.5	287	310	GCUGUUAACAAAUUGUCGGAGUUU	Cleavage
ghy-miRn4	c48572.graph_c3	hypothetical protein	3.5	179	202	UAAUUUCCCCAAUUUUCAGGGUUU	Translation
ghy-miRn4	c36470.graph_c0	neutral ceramidase 2-like	3.5	2424	2447	CAUGUUGACCAAUCAUUAGACUUU	Cleavage
ghy-miRn4	c41366.graph_c0	serine/threonine-protein kinase PCRK1-like	3.5	581	604	ACCCGGACCCGGUCAUCAGAAUUU	Cleavage
ghy-miRn4	c35884.graph_c0	two-component response regulator-like APRR7	3.5	237	260	UUAAGUGCUCAAAUAUUAGAGUUU	Cleavage
ghy-miRn4	c41346.graph_c0	Uncharacterized protein	3.5	913	936	GCAUUUGUCCAACUAUCAGGGUUU	Cleavage
ghy-miRn4	c47377.graph_c0	Uncharacterized protein	3.5	1654	1674	UAGUAGCAUCAUCAACAUUGU	Cleavage
ghy-miRn4	c38011.graph_c0	unnamed protein product	3.5	144	167	GUAUUUUUUCAAUUAUUAGGGUUU	Cleavage
ghy-miRn4	c47638.graph_c1	E3 ubiquitin-protein ligase SINAT2-like	4	608	631	AAAGUUGCCAAAUCGUUAGAGCUU	Cleavage
ghy-miRn4	c69938.graph_c0	hypothetical protein	4	169	192	UAGAAUAUCCAAUUACCAGAGUGU	Cleavage
ghy-miRn4	c50427.graph_c0	hypothetical protein	4	99	122	AUGAUUAUUUAGUUAUCAAAGUUU	Cleavage
ghy-miRn4	c55329.graph_c0	MYB15-like transcription factor	4	236	259	GAUAUGAACAAAUCGUUAGAGUUU	Cleavage
ghy-miRn4	c42558.graph_c0	NADH-cytochrome b5 reductase-like protein	4	976	999	AACUUUAUCCAUUUAUCAGGGUUG	Cleavage
ghy-miRn4	c47189.graph_c0	N-terminal acetyltransferase B complex auxiliary subunit NAA25	4	3225	3248	GCCAUUAAACAGUUAUUAGGGUUU	Cleavage
ghy-miRn4	c45743.graph_c0	O-fucosyltransferase 1-like	4	1611	1634	CAAAUUCUUGGCCGGAGUGUUUCU	Cleavage
ghy-miRn4	c47324.graph_c1	receptor protein-tyrosine kinase CEPR2	4	1795	1821	GAGAAAUUUCUCCGGCCAUCAGAGUUU	Cleavage
ghy-miRn4	c44469.graph_c0	Uncharacterized protein	4	2053	2076	GAAUUUCCCUAAUCAUUAGGGCUU	Cleavage
ghy-miRn4	c46796.graph_c0	Uncharacterized protein	4	1898	1921	AAAAUGAUCAAAUCUUCAGAGUUU	Translation
ghy-miRn4	c25267.graph_c0	Uncharacterized protein	4	250	274	CCGCUUACCACAAUUGUCGGGGUUU	Cleavage
ghy-miRn4	c25267.graph_c0	Uncharacterized protein	4	250	274	CCGCUUACCACAAUUGUCGGGGUUU	Cleavage
ghy-miRn4	c38818.graph_c0	Uncharacterized protein	4	243	266	AAACUUCUAUAUAAACGGUGUUUC	Cleavage
ghy-miRn4	c50174.graph_c0	MOS2-like protein	4.25	789	814	AUCAGUACCCAAUAUCAUCAGGGUUU	Translation
ghy-miRn4	c48257.graph_c0	elongator complex protein 2	4.5	1707	1730	CCGGUUGCCAAAUCAUCAUAGUCU	Cleavage
ghy-miRn4	c49410.graph_c0	glycosyltransferase	4.5	56	79	GAUUUUAUUUAAUUAUCAUAGUUA	Cleavage
ghy-miRn4	c38063.graph_c0	hypothetical protein	4.5	1157	1180	AGUGUGACAGGCAUGAUGACAUUG	Cleavage
ghy-miRn4	c40034.graph_c0	RNA-directed DNA polymerase	4.5	413	436	UAUAUGGCUCAAUCACCGGGGUUU	Cleavage
ghy-miRn4	c50064.graph_c0	Uncharacterized protein	4.5	4987	5007	UGGUCUAUAUAAGAGAUCCUA	Cleavage
ghy-miRn4	c41518.graph_c0	unnamed protein product	4.5	113	136	GAGAUUAUCCAACCAUUAGGGCUU	Cleavage
ghy-miRn4	c49409.graph_c0	unnamed protein product	4.5	1838	1861	AAGAUUACAUAAUUAUUGGAAUUU	Cleavage
ghy-miRn4	c25974.graph_c0	WRKY8	4.5	791	814	GACAUGGCCUCGUCAUCAGAGUUG	Cleavage
ghy-miRn4	c49337.graph_c0	biotin carboxyl carrier protein of acetyl-CoA carboxylase	5	194	217	UCGAUUUUUCAAGCAUUGGGGUUU	Cleavage
ghy-miRn4	c47913.graph_c0	F-box protein	5	1651	1674	UAUGGUAAAAAACUUGUCAAUUCU	Cleavage
ghy-miRn4	c35989.graph_c0	F-box protein CPR1-like	5	556	579	UUGGUUAUUCAAUGAUUGAAGUUU	Translation
ghy-miRn4	c45306.graph_c0	histone acetyltransferase GCN5	5	1558	1582	AGGAUUAUGUCAAUUAUCUGAGUUU	Cleavage
ghy-miRn4	c63619.graph_c0	hypothetical protein	5	237	260	CCAAUUAUUUAAUCAUUAUUGUUU	Cleavage
ghy-miRn4	c42002.graph_c0	metallophosphoesterase 1-like	5	1807	1829	GUGAUUAUUUAAUUAUC-GAGUUU	Cleavage
ghy-miRn4	c54464.graph_c0	Pentatricopeptide repeat-containing protein	5	1339	1362	UGUUUUGUUUAAUUAUCAGAGUAA	Cleavage
ghy-miRn4	c47619.graph_c3	ras-related protein Rab11C-like	5	242	265	AUCUAAAGUUGUAAAUCACUCACA	Translation
ghy-miRn4	c47619.graph_c3	ras-related protein Rab11C-like	5	242	265	AUCUAAAGUUGUAAAUCACUCACA	Translation
ghy-miRn4	c12601.graph_c0	Uncharacterized protein	5	346	371	UGGAUUGAACCCAAAUAUUAGAGUUU	Cleavage
ghy-miRn4	c49527.graph_c0	unnamed protein product	5	2636	2659	GAGAUUGAAAUUGAAAUUGAAAUU	Translation
ghy-miRn5	c40117.graph_c0	BTB/POZ domain-containing protein	0.5	1	20	AGUGUUACCAAAUGAGACCU	Cleavage
ghy-miRn5	c46160.graph_c0	Uncharacterized protein	1	128	151	GGUAAGUGUUACCAAACGAGGUCU	Cleavage
ghy-miRn5	c48645.graph_c0	C-terminal binding protein AN	1.5	2079	2102	CGUAAGUGUUACCAAACAAGACCU	Cleavage
ghy-miRn5	c48645.graph_c0	C-terminal binding protein AN	1.5	2079	2102	CGUAAGUGUUACCAAACAAGACCU	Cleavage
ghy-miRn5	c46800.graph_c1	lysine-specific demethylase JMJ25-like	1.5	155	178	CAAAAGUGUUCCCAAACGAGGCCU	Cleavage
ghy-miRn5	c47373.graph_c0	transferase	1.5	1334	1357	UAAAAGUGUUACCAAACAAGACCU	Cleavage
ghy-miRn5	c50464.graph_c2	Uncharacterized protein	1.5	319	342	UGUAAGUGAUACCAAACGAGGCCU	Cleavage
ghy-miRn5	c36932.graph_c0	UPF0161 protein	1.5	143	166	CAUAAGUGUUGUCAAACGAGGCCU	Cleavage
ghy-miRn5	c43858.graph_c0	1-acyl-sn-glycerol-3-phosphate acyltransferase 3	2	217	240	CAUAAGUGUUACUGAAUGAGGCCU	Cleavage
ghy-miRn5	c47718.graph_c1	nucleolar complex protein 2 homolog	2	218	241	CGUAGGUAUUGCCAAACGAGGCCU	Cleavage
ghy-miRn5	c42857.graph_c0	U11/U12 small nuclear ribonucleoprotein 59 kDa protein	2	1705	1728	CGGAAGUGUUGCCAAAUGAGGUCU	Cleavage
ghy-miRn5	c49521.graph_c0	Uncharacterized protein	2	360	383	CGUUAAUGUUACCAAACGAGGUCU	Cleavage
ghy-miRn5	c43789.graph_c0	unnamed protein product	2	869	892	CGUAAGUGUCACCAAAUGAGGCCU	Cleavage
ghy-miRn5	c39656.graph_c0	beta-amylase 2	2.5	144	167	CAUAAAUGUUACAAAACGAGACCU	Cleavage
ghy-miRn5	c28041.graph_c0	hypothetical protein	2.5	14	37	CGUAAUUGUUACCAAACGAGGCCG	Cleavage
ghy-miRn5	c44152.graph_c1	hypothetical protein	2.5	65	88	UAUAAAUGUUACCAAGUGAGGCCU	Cleavage
ghy-miRn5	c43778.graph_c0	protein transport Sec1a	2.5	1205	1228	UAUAAAUGUCAUCAAACGAGACCU	Cleavage
ghy-miRn5	c48584.graph_c3	transcription factor GAMYB-like	2.5	3390	3413	CAUAAGUGUUACUAAACGAGGCAU	Cleavage
ghy-miRn5	c44763.graph_c0	UDP-glucose 4-epimerase	2.5	1503	1526	GGUAACUGUUACCAAAUGGGGCCU	Cleavage
ghy-miRn5	c46110.graph_c0	Cyclophilin-like peptidyl-prolyl cis-trans isomerase domain-containing protein	3	296	319	UGUAAGUGUUAUUAAACGAAGCCU	Cleavage
ghy-miRn5	c49205.graph_c0	hypothetical protein	3	50	73	CAUAAGUGUUACCAAAUGACACCA	Cleavage
ghy-miRn5	c42778.graph_c0	hypothetical protein	3	158	181	CGUAAAUGUUACCAAUCGAGAUCU	Cleavage
ghy-miRn5	c48512.graph_c0	methylesterase 11	3	1686	1709	CAUAAGUGUUAACAAACCAGACCU	Cleavage
ghy-miRn5	c47819.graph_c1	programmed cell death 6-interacting protein	3	50	73	ACUAAGUGUUACCAAACAAGGCCA	Cleavage
ghy-miRn5	c44308.graph_c0	pumilio homolog 12	3	2480	2503	UGUAAGCGUUAUCAAACCAGACCU	Cleavage
ghy-miRn5	c48676.graph_c0	unnamed protein product	3	681	704	UGUGUUCACACUCACAAACGGCGU	Cleavage
ghy-miRn5	c25282.graph_c0	UPF0183 protein	3	155	178	UGUAACGGUUACUAAACGAGGCCU	Cleavage
ghy-miRn5	c25282.graph_c0	UPF0183 protein	3	155	178	UGUAACGGUUACUAAACGAGGCCU	Cleavage
ghy-miRn5	c50111.graph_c1	CLIP-associated protein	3.5	3702	3725	UAGUCUUUCGAAACUUGCGUCUUU	Cleavage
ghy-miRn5	c46666.graph_c0	glycosyltransferase family 64 protein C4-like	3.5	19	42	UGUAAUUGUUGCCGAACAAGACCU	Cleavage
ghy-miRn5	c45865.graph_c0	protein kinase PVPK-1	4	1212	1232	CUGCAUCAUUAUUAGGGUUCA	Cleavage
ghy-miRn5	c49595.graph_c2	Uncharacterized protein	4	144	167	UGUAAGUAUUAUCAAAUGAGGCAU	Cleavage
ghy-miRn5	c48524.graph_c0	unnamed protein product	4	1294	1317	UGUAAGUGUUACCAAACAUGGCUU	Cleavage
ghy-miRn5	c48674.graph_c0	WPP domain-associated protein	4	1502	1522	UAUGCUUCUUUUCUUCUAUCA	Cleavage
ghy-miRn5	c47923.graph_c0	26S proteasome regulatory subunit 4 homolog A	4.5	1133	1156	UUCGUUAUCAAGUUUAAUCUUCUU	Cleavage
ghy-miRn5	c41784.graph_c0	IQ domain-containing protein IQM2	4.5	509	529	ACACAGAAUCAUCAAGAUUGG	Cleavage
ghy-miRn5	c48371.graph_c0	kelch domain-containing protein 4	4.5	569	592	UUUUGAUGUCAAACAGGUUACUUU	Translation
ghy-miRn5	c48417.graph_c0	Armadillo-like helical	5	329	352	GAUUAGAAAAGUUCUGUGGAUGUU	Cleavage
ghy-miRn5	c49758.graph_c0	hypothetical protein	5	1878	1902	CCAUAGGGAUUAAGAAUAGGGUUUU	Translation
ghy-miRn6	c47917.graph_c0	sucrose transport protein SUC3	1.5	2168	2191	CCCACCUUUCACCAAAUCUACAUU	Cleavage
ghy-miRn6	c47402.graph_c1	unnamed protein product	1.5	88	111	CUUGUCUUUCACCAAAUCUACAUU	Cleavage
ghy-miRn6	c47402.graph_c1	unnamed protein product	1.5	88	111	CUUGUCUUUCACCAAAUCUACAUU	Cleavage
ghy-miRn6	c47307.graph_c0	nuclear intron maturase 2l	2	374	397	UCCACUUUUCAUCAAAUCCACAUU	Cleavage
ghy-miRn6	c43314.graph_c0	Uncharacterized protein	2	1355	1378	UCGACUUUUCAUCAAAUGUACAUU	Cleavage
ghy-miRn6	c43314.graph_c0	Uncharacterized protein	2	1355	1378	UCGACUUUUCAUCAAAUGUACAUU	Cleavage
ghy-miRn6	c39278.graph_c0	Uncharacterized protein	2	290	313	ACACCCUUUUAUCGAAUUUAUAUU	Cleavage
ghy-miRn6	c49908.graph_c0	DExH-box ATP-dependent RNA helicase	2.5	3893	3916	ACAUUCUUAGUCCAAAAUAGUCAU	Cleavage
ghy-miRn6	c48061.graph_c0	Uncharacterized protein	2.5	1426	1449	CUCACCUUUCACUAAAUUUACAUU	Cleavage
ghy-miRn6	c49841.graph_c0	Uncharacterized protein	2.5	1330	1353	GUUUUUUUCCAUCAAAUUUGCAUU	Cleavage
ghy-miRn6	c16023.graph_c0	villin-3	2.5	387	410	CCCACAUUUCAGCAAAUCUACAUU	Cleavage
ghy-miRn6	c47646.graph_c0	villin-3-like	2.5	1624	1647	CCCACCUUGCACCAAAUCUACAUU	Cleavage
ghy-miRn6	c26044.graph_c0	hydroxyproline O-arabinosyltransferase 3-like	3	1394	1417	CAGAUCCUUGGUCAAAUUUACAUU	Cleavage
ghy-miRn6	c50038.graph_c0	Retrovirus-related Pol polyprotein from transposon TNT 1-94	3	206	229	UCAUCUGUCAAAAUCAUCAUCGUU	Cleavage
ghy-miRn6	c16686.graph_c0	Retrovirus-related Pol polyprotein LINE-1	3	725	748	UCUUUGUUUCAUCAAAUAUAUAUU	Cleavage
ghy-miRn6	c46774.graph_c0	Uncharacterized protein	3	868	891	UCAAGCUUUCAUCAAAUUUAAAUA	Cleavage
ghy-miRn6	c37370.graph_c0	Uncharacterized protein	3	153	176	ACUGUUUUCUGUCAAAUUUACAUU	Cleavage
ghy-miRn6	c49715.graph_c0	AAA+ ATPase domain-containing protein	3.5	4844	4867	UUGGUGUUGAAGGCUUGAAGACGU	Cleavage
ghy-miRn6	c48316.graph_c0	calmodulin-binding transcription activator 4	3.5	511	534	UCCACCUUUCGCCACAUCUACAUU	Translation
ghy-miRn6	c46258.graph_c2	chalcone isomerase	3.5	2069	2092	UCCAUCUUUAACUAAAUUUACAUU	Cleavage
ghy-miRn6	c38939.graph_c0	cinnamyl alcohol dehydrogenase 1	3.5	130	153	UUCAUUAUCCAUCAAAUUUAUAUU	Cleavage
ghy-miRn6	c48572.graph_c3	hypothetical protein	3.5	179	202	UAAUUUCCCCAAUUUUCAGGGUUU	Translation
ghy-miRn6	c33195.graph_c0	hypothetical protein	3.5	1554	1577	GCUAGCCAAGAUCCUUGAGGUCGG	Cleavage
ghy-miRn6	c48186.graph_c2	hypothetical protein	3.5	484	507	UCCUUUAUUUGUUAAAUCUACGUU	Cleavage
ghy-miRn6	c45055.graph_c0	Leucine-rich repeat-containing protein	3.5	979	1002	UUCAUCUUUUAUGAAGUUUGCAUU	Cleavage
ghy-miRn6	c42296.graph_c0	PHD finger protein ING1	3.5	795	818	UCCGUCUUUCACCCAAUCUGCAUU	Translation
ghy-miRn6	c30559.graph_c0	phosphoinositide phosphatase SAC1	3.5	409	432	AAAAUCUUUUGUCAAGUCUACGCU	Cleavage
ghy-miRn6	c25662.graph_c0	ubiquitin-activating enzyme E1 1-like	3.5	73	96	GUAAUUUUUCAUCAAAUCUCCAAU	Cleavage
ghy-miRn6	c50123.graph_c0	Uncharacterized protein	3.5	420	443	UUCUUCUUUCUUCAAUUCUGUAUU	Cleavage
ghy-miRn6	c50443.graph_c0	Uncharacterized protein	3.5	2393	2416	GUUGUUUUCUGUCAAGUUUACAUU	Cleavage
ghy-miRn6	c50159.graph_c1	Uncharacterized protein	3.5	1616	1639	AUUAUUUUUGAUCAAAUUUACUUU	Cleavage
ghy-miRn6	c46306.graph_c1	unnamed protein product	3.5	2185	2208	CCCAUUUUUCACCAAAUCAACAUU	Cleavage
ghy-miRn6	c42012.graph_c0	cellulose synthase A catalytic subunit 8 [UDP-forming]-like	4	609	632	GGAAACGAGCUUCCUCGACUUGUU	Translation
ghy-miRn6	c41048.graph_c0	hypothetical protein	4	55	76	GUCAAUCUGUCAUGGUGUAGAU	Cleavage
ghy-miRn6	c50057.graph_c0	hypothetical protein	4	9583	9603	GACAUGUUUCCUGUUUCUUCU	Cleavage
ghy-miRn6	c45734.graph_c2	lipid phosphate phosphatase delta-like	4	215	238	CCCACUUUUCACUAAAUCCACAUU	Cleavage
ghy-miRn6	c47842.graph_c0	mitochondrial protein	4	51	74	ACCAUAUGUUAUUAGAUCUAUAUU	Cleavage
ghy-miRn6	c42229.graph_c0	Mpv17-like protein	4	291	314	CCCGACUUUUAUCAGUUUUAUGUU	Cleavage
ghy-miRn6	c53844.graph_c0	MYB52 transcription factor	4	509	532	GAAAUCUUUCAUCACAUCUACAAC	Translation
ghy-miRn6	c50000.graph_c1	PHOX1-like	4	882	905	CUCGUCUUGCAUCAAAUUUGUUUU	Cleavage
ghy-miRn6	c10006.graph_c0	ribonuclease H-like domain-containing protein	4	42	65	AUGGUCUUUUGUCAAAUCUGCACC	Cleavage
ghy-miRn6	c47338.graph_c0	trihelix transcription factor GTL2	4	4098	4121	ACAAUUAAGUGAUUGCGGUCAAUU	Cleavage
ghy-miRn6	c40236.graph_c0	Uncharacterized protein	4	1249	1272	UGUAAGCCCCAUCCGACGGUAUUU	Cleavage
ghy-miRn6	c49300.graph_c0	Uncharacterized protein	4	3640	3663	UUUAUCUUUUAUGAAAUCUUUAUU	Cleavage
ghy-miRn6	c43434.graph_c3	Uncharacterized protein	4	422	442	UGGACGGGUCUUGCUUCUUUA	Cleavage
ghy-miRn6	c44482.graph_c0	7-deoxyloganetic acid glucosyltransferase-like	4.5	1124	1147	GAUCACGUCGACGAAGAAGUCCUU	Cleavage
ghy-miRn6	c42132.graph_c0	BEACH domain-containing protein B	4.5	5169	5192	GCCACCUUUUAUCGAAUGUAUGUA	Cleavage
ghy-miRn6	c41560.graph_c0	DUF21 domain-containing protein	4.5	242	263	GUUAUUGUGUUGUGGUGCCGGA	Cleavage
ghy-miRn6	c36836.graph_c0	GRAS protein	4.5	806	829	CAACAUACAGUUCAGUCAUUUGCA	Cleavage
ghy-miRn6	c47488.graph_c0	histone deacetylase, Zinc finger, UBP-type, Zinc finger, RING/FYVE/PHD-type	4.5	2277	2300	ACCGUUUUCUAUCAAGUUUACAAU	Cleavage
ghy-miRn6	c46803.graph_c0	hypothetical protein	4.5	254	277	UCCAUUGUUCUUCAGAUCUGCAUC	Cleavage
ghy-miRn6	c45314.graph_c0	protein FRA10AC1	4.5	945	968	UUGUUUAAAUAAUUUAACGUUCAU	Cleavage
ghy-miRn6	c43335.graph_c0	unnamed protein product	4.5	1388	1408	UGACGAUGAUCGAGUUGAUUU	Cleavage
ghy-miRn6	c13996.graph_c0	ATP-dependent Clp protease proteolytic subunit 3	5	124	147	CCUAUUUAUUAUCAAAUCGCCAUU	Cleavage
ghy-miRn6	c46665.graph_c0	cationic amino acid transporter 1-like	5	2087	2112	CCUAUUGUUUUUAUCAGAUUUAUAUU	Cleavage
ghy-miRn6	c45500.graph_c0	glucomannan 4-beta-mannosyltransferase 2	5	1345	1369	AAGUUUUACGUGAUCUAUAGCUUUU	Cleavage
ghy-miRn6	c39575.graph_c0	inactive receptor kinase	5	2213	2235	ACGAUUUAAGU-GGUCAAGUCCCU	Cleavage
ghy-miRn6	c39575.graph_c0	inactive receptor kinase	5	2213	2235	ACGAUUUAAGU-GGUCAAGUCCCU	Cleavage
ghy-miRn6	c36965.graph_c0	kinesin-like protein KIN-10C	5	663	683	GAACUGAUAGUACAGAUUUUG	Translation
ghy-miRn6	c47874.graph_c0	mitochondrial substrate carrier family protein B-like	5	974	998	CCCAAUAAAGUUGCUCCAAGUCCUU	Translation
ghy-miRn6	c47874.graph_c0	mitochondrial substrate carrier family protein B-like	5	974	998	CCCAAUAAAGUUGCUCCAAGUCCUU	Translation
ghy-miRn6	c48105.graph_c0	protein ABIL3-like	5	2026	2046	GAUAUUUAUAUGGUUCAAUAA	Cleavage
ghy-miRn6	c42503.graph_c2	protein FAR1-RELATED SEQUENCE 7-like	5	1653	1677	GUUGUCAUGCCAGCAAAAAAAGUGU	Cleavage
ghy-miRn6	c48605.graph_c0	RFT1 homolog	5	360	380	UUUCCGGAGAGCAUGCAUGAG	Translation
ghy-miRn6	c40109.graph_c0	unnamed protein product	5	1569	1592	UCCGGCAAGAAUCCAUGGAAUUGU	Translation
ghy-miRn6	c46010.graph_c1	zinc finger MYND domain-containing protein 15	5	619	639	UCCGAUUGCUCUGCUUCUUCA	Cleavage
ghy-miRn7	c39811.graph_c0	DNA helicase MCM9	3.5	338	361	AAAGUUUGGCAGCAUGAAAGUUAU	Cleavage
ghy-miRn7	c47379.graph_c0	hypothetical protein	3.5	3297	3319	UUCCAGGUUCGUCAUCAUUGCCU	Cleavage
ghy-miRn7	c44914.graph_c0	PHD finger protein	3.5	1008	1028	CAUGCUAUUCCUCUUGGACUU	Cleavage
ghy-miRn7	c44771.graph_c0	protein HUA2-LIKE 2-like	3.5	4499	4523	AUUGAUCAAAGCCAUGAGAUCAUUU	Cleavage
ghy-miRn7	c32005.graph_c0	RNA-directed DNA polymerase	3.5	216	239	UGACCUUUGCAGGGGGAGCAGUAU	Cleavage
ghy-miRn7	c45074.graph_c0	CASP-like protein 2A1	4	653	676	GCCUUUCUGCAGAAGUUGCCGUAU	Translation
ghy-miRn7	c31183.graph_c0	hypothetical protein	4	170	193	UAUCGUUUGAAGAGGUAUCCGUGG	Cleavage
ghy-miRn7	c91388.graph_c0	pyruvate kinase	4	184	207	GGUGGUCUGCAGCGGUAGCCAUAU	Cleavage
ghy-miRn7	c40338.graph_c0	ras-related protein RABB1b	4	794	817	AUGUAUUUGAAGAGGUAAUCGUAC	Cleavage
ghy-miRn7	c50447.graph_c0	RNA-directed DNA polymerase	4	1532	1555	CAAAUGAUGGGUUUAAAGUACCAU	Cleavage
ghy-miRn7	c46796.graph_c0	Uncharacterized protein	4	1898	1921	AAAAUGAUCAAAUCUUCAGAGUUU	Translation
ghy-miRn7	c42556.graph_c1	WRKY transcription factor 6-like	4	442	465	UAUUAUUGGUGGAGGUGGCCGUGG	Cleavage
ghy-miRn7	c48037.graph_c0	ATP-dependent DNA helicase Q-like 4A	4.5	2457	2477	GGUUCAAAAGCAGUGGAGUAA	Translation
ghy-miRn7	c49042.graph_c0	cleavage stimulating factor 64	4.5	1831	1855	UUCUUCUUUCUCAGCAUCGUCGAUU	Cleavage
ghy-miRn7	c48487.graph_c0	DNA/RNA helicase, DEAD/DEAH box type, N-terminal	4.5	3825	3848	GAUUUGCUGCAGAGGUUGCUGUGU	Cleavage
ghy-miRn7	c50059.graph_c0	hypothetical protein	4.5	2549	2569	GUAAACAUCAGACUUUUGUUU	Cleavage
ghy-miRn7	c48717.graph_c0	kappa-B-binding protein-like nuclear factor	4.5	1530	1553	ACAGUUGAUUUUUUACCGUCUAUU	Cleavage
ghy-miRn7	c44138.graph_c0	NASP-related protein sim3	4.5	761	784	CAGCUUUGGCAGAGGUAGCUCUGG	Cleavage
ghy-miRn7	c47751.graph_c0	protein JINGUBANG-like	4.5	605	628	GCAGUUUUAUAGAGGUACACGUAU	Cleavage
ghy-miRn7	c44139.graph_c0	purple acid phosphatase 2-like	4.5	1970	1993	CUACUUUUGUGGAGGGAGACGUGU	Cleavage
ghy-miRn7	c1979.graph_c0	S-type anion channel SLAH4-like	4.5	208	231	CUCGAUUUGCGGUGGUGGCGGUGU	Cleavage
ghy-miRn7	c49810.graph_c2	trehalose synthase/alpha-amylase	4.5	2699	2722	CUUGGUUUGAAGAGGCAGCCAUGU	Cleavage
ghy-miRn7	c45511.graph_c0	uncharacterized protein	4.5	1800	1823	CACUUUUUUUGGAGGUGGCUGCAU	Cleavage
ghy-miRn7	c36276.graph_c0	unnamed protein product	4.5	172	195	UCGAAAUUGCAGAGGAAGCUGUUU	Cleavage
ghy-miRn7	c43426.graph_c1	unnamed protein product	4.5	1383	1406	UUAGAUUUGCAUAGGUAUCCGUGC	Cleavage
ghy-miRn7	c38341.graph_c0	disease resistance RPP13-like protein 2	5	1264	1287	AUAGUUGUUUAGAUGUAGUCGUGU	Translation
ghy-miRn7	c39202.graph_c0	hypothetical protein	5	862	885	UAAUUCAUGAAUUCAACAACCUCU	Translation
ghy-miRn7	c24742.graph_c0	quinolinate synthase	5	1161	1179	GGUUUUCCUGAGGUUGUUG	Cleavage
ghy-miRn7	c38635.graph_c0	Uncharacterized protein	5	461	483	GUCUUUUUGCA-AUGUAGUCGUAU	Translation
ghy-miRn7	c23334.graph_c0	Uncharacterized protein	5	4084	4107	CCAGUUUAACAGAGGUGCUUGUAU	Cleavage
ghy-miRn7	c41573.graph_c0	unnamed protein product	5	393	416	GUGUGUUCGAUACUGCCAUCAUUC	Translation
ghy-miRn8	c24263.graph_c0	unnamed protein product	2	83	104	GGUUGUAUUCUUGAGUUUUAGA	Cleavage
ghy-miRn8	c46997.graph_c0	endoglucanase 6-like	2.5	1732	1752	AGCGUUAUGCCUUCUGAGCUU	Cleavage
ghy-miRn8	c47580.graph_c0	proline-rich receptor-like protein kinase PERK3	2.5	2798	2821	UGUGGUAACGGAACUGGAUCGAAU	Cleavage
ghy-miRn8	c51598.graph_c0	TMV resistance protein N-like	2.5	64	85	CGAUGUUUUCUUGAGCUUCAGA	Cleavage
ghy-miRn8	c40514.graph_c0	CAAX prenyl protease 1 homolog	3	1222	1242	CCAAUCAACAGAUUCUUUUCU	Cleavage
ghy-miRn8	c44308.graph_c0	pumilio homolog 12	3	2480	2503	UGUAAGCGUUAUCAAACCAGACCU	Cleavage
ghy-miRn8	c49813.graph_c0	TMV resistance protein N-like	3	1178	1201	AGAAAUAAAGAUUCUGUUAGUCCU	Cleavage
ghy-miRn8	c46267.graph_c0	ankyrin repeat-containing protein	3.5	601	622	AUUUUUGAGGCUUCGGAGGCGG	Cleavage
ghy-miRn8	c11865.graph_c0	disease resistance protein RPV1-like	3.5	124	145	CGAUGUUUUUUUGACCUUCAGC	Cleavage
ghy-miRn8	c46566.graph_c0	hypothetical protein	3.5	307	327	UUUUUCUAA-CUUCAGAGGCGA	Cleavage
ghy-miRn8	c43306.graph_c0	RNA-directed DNA polymerase	3.5	60	81	UUAUCCAAAGCUUCGGAGUCGG	Cleavage
ghy-miRn8	c28944.graph_c0	TMV resistance protein N-like	3.5	337	358	UGACGUGUUCUUAAGUUUUAGA	Cleavage
ghy-miRn8	c46775.graph_c0	TMV resistance protein N-like	3.5	2576	2599	CAUUAUAGUGGGAUACGAGAUCUU	Cleavage
ghy-miRn8	c43559.graph_c0	ABC-2 and Plant PDR ABC-type transporter family protein	4	1763	1786	AGAACCUACCAGCUUCAGGGGCGA	Cleavage
ghy-miRn8	c23452.graph_c0	Armadillo-like helical	4	659	679	CAAAUCAUGGUGGUGGUUUCA	Cleavage
ghy-miRn8	c50188.graph_c0	disease resistance protein RUN1	4	2937	2957	UCCGUUAACCUUCUUGAGCCU	Cleavage
ghy-miRn8	c47638.graph_c1	E3 ubiquitin-protein ligase SINAT2-like	4	608	631	AAAGUUGCCAAAUCGUUAGAGCUU	Cleavage
ghy-miRn8	c92299.graph_c0	hypothetical protein	4	131	152	CAAUUUUUAGCUUUAGAGGUGU	Cleavage
ghy-miRn8	c38768.graph_c0	hypothetical protein	4	1449	1470	GGAGACUGAGUUUCGGAGGUGA	Cleavage
ghy-miRn8	c48675.graph_c3	hypothetical protein	4	1377	1398	CACUAAUUUCUUGAGUUUCAGA	Cleavage
ghy-miRn8	c62512.graph_c0	myb-related protein 306-like	4	254	277	AGCGUUUUGUUGGUGGGAUUUGAU	Cleavage
ghy-miRn8	c35207.graph_c0	reactive oxygen species modulator 1	4	56	77	AGGGCCUUAGUUUCAGAGGAGA	Cleavage
ghy-miRn8	c49925.graph_c0	ribosome biogenesis protein BMS1 homolog	4	2447	2468	GGAAGCUGAGCUUCAGAGGCAA	Cleavage
ghy-miRn8	c26243.graph_c0	sm-like protein LSM8	4	484	506	GGUCUCUACA-UCAUAAGGGGCGA	Cleavage
ghy-miRn8	c50281.graph_c0	TMV resistance protein N	4	639	662	UGUUUCAAACAAAUCAUUGUAGUC	Cleavage
ghy-miRn8	c39254.graph_c0	TMV resistance protein N-like	4	213	234	UGAUGUCUUCUUAAGUUUUAGA	Cleavage
ghy-miRn8	c49298.graph_c1	wall-associated receptor kinase-like 16	4	599	620	CAACGUUUUUCUCAGUUUUAGA	Translation
ghy-miRn8	c49298.graph_c1	wall-associated receptor kinase-like 16	4	599	620	CAACGUUUUUCUCAGUUUUAGA	Translation
ghy-miRn8	c61455.graph_c0	14-3-3 family protein	4.5	389	410	AGUUCUUGGUCUUCUGAGGCGA	Cleavage
ghy-miRn8	c44581.graph_c0	DEAD-box ATP-dependent RNA helicase 24	4.5	2213	2234	UCUCCUUAGCCUUCGGAGGCGG	Cleavage
ghy-miRn8	c21567.graph_c0	delta-1-pyrroline-5-carboxylate synthase-like	4.5	12	33	CCUUCCCAGGCUUCAGAGCCAA	Cleavage
ghy-miRn8	c48423.graph_c0	DNA (cytosine-5)-methyltransferase CMT3-like	4.5	1115	1138	AGUGGAAGAAGCUUUGCCAGUCCU	Cleavage
ghy-miRn8	c49264.graph_c0	DNA-directed RNA polymerase 2B/mitochondrial	4.5	799	822	CCUAGUGCAGUUAACGUGAUUUUU	Cleavage
ghy-miRn8	c29541.graph_c0	F-box protein	4.5	287	306	GGC-CUUUUUCUUCUGAGCUU	Cleavage
ghy-miRn8	c43969.graph_c0	histone-lysine N-methyltransferase ASHH1	4.5	417	438	AUUUUCUGAGCUUUAGGGGCUU	Cleavage
ghy-miRn8	c34417.graph_c0	hypothetical protein	4.5	387	408	UGUUUUGAUUCUUCAGAGGCGA	Cleavage
ghy-miRn8	c43545.graph_c0	Integrase core domain containing protein	4.5	973	993	GUUUGAGAAAGAUCUCAUGAU	Cleavage
ghy-miRn8	c46062.graph_c0	methyl-CpG-binding domain-containing protein 13	4.5	986	1007	GAGUUUUAGGCUCUGGAGGUGA	Translation
ghy-miRn8	c50200.graph_c0	pentatricopeptide repeat-containing protein	4.5	403	426	UCAUUCUCUCCUGCAUGUUUGAUU	Cleavage
ghy-miRn8	c17184.graph_c0	Retrovirus-related Pol polyprotein from transposon TNT 1-94	4.5	1487	1508	AGUUCCCAAUUUUUGGAGGCGG	Cleavage
ghy-miRn8	c33868.graph_c0	scarecrow-like protein 15	4.5	300	321	AAUUUUCGAGCUUUUGAGGCGA	Cleavage
ghy-miRn8	c43596.graph_c1	solute carrier family 35 member	4.5	1894	1915	GCUUUGUAAGUUUCACAGGUGG	Cleavage
ghy-miRn8	c25316.graph_c0	sucrose synthase 6-like	4.5	929	950	AUUAACUAAGCUUCUGAGGCGC	Cleavage
ghy-miRn8	c43714.graph_c0	toll/interleukin-1 receptor (TIR) domain-containing protein	4.5	1511	1532	UGACGUGUUCCUAAGUUUCAGA	Cleavage
ghy-miRn8	c27065.graph_c0	Uncharacterized protein	4.5	1001	1023	AUCUCCCAAGCUUGUAGAGGCGA	Cleavage
ghy-miRn8	c22929.graph_c0	Uncharacterized protein	4.5	1326	1347	UUUUUUUGAUCUACAGAGGCGA	Translation
ghy-miRn8	c39324.graph_c0	Uncharacterized protein	4.5	1308	1329	AGAAGCUAAGAUUUAGAGGUGA	Cleavage
ghy-miRn8	c70609.graph_c0	Uncharacterized protein	4.5	259	279	AUUUCCUAAG-UUUGGGGGCGA	Cleavage
ghy-miRn8	c33306.graph_c1	acid phosphatase 1-like	5	50	71	UAUUUAUAAGCUUCGCCGGCGA	Cleavage
ghy-miRn8	c42345.graph_c0	Anticodon-binding	5	529	550	CUUUCCAAAGCUUCACAGGCCU	Cleavage
ghy-miRn8	c18559.graph_c0	Armadillo-type fold	5	663	684	UUUUCCCUAGCUUCGGAGGCAU	Cleavage
ghy-miRn8	c47647.graph_c0	DnaJ domain-containing protein	5	2478	2499	UAUCUAUAAGCUUUGCAGGCGA	Cleavage
ghy-miRn8	c46006.graph_c0	leucine-rich repeat receptor-like protein kinase IMK3	5	748	769	UUGUUCUAAGCUUUAUAGGCUC	Cleavage
ghy-miRn8	c24844.graph_c0	mediator of RNA polymerase II transcription subunit 13	5	197	218	GGUGCUUAGGCUUCGGAGGCUU	Cleavage
ghy-miRn8	c48495.graph_c0	myb/SANT-like domain, Harbinger transposase-derived nuclease domain protein	5	396	417	CGUUUCUAAGUUUUACAUGUGA	Cleavage
ghy-miRn8	c47875.graph_c0	OTU domain-containing protein	5	2155	2176	UUUUCUUGAGCUUUUGGGCCGA	Cleavage
ghy-miRn8	c29775.graph_c0	plasma membrane ATPase 1-like	5	414	435	CUUUCUUGGGUUAUGGAGGCGG	Translation
ghy-miRn8	c39754.graph_c0	poly(A)-specific ribonuclease PARN-like	5	1890	1911	UGAUGAUCUUUGAAGCUUUGGA	Translation
ghy-miRn8	c50389.graph_c0	protein FAR1-RELATED SEQUENCE 5-like	5	1375	1396	UGUUUUCAAGCUUCAUGGGUGG	Cleavage
ghy-miRn8	c34315.graph_c0	Remorin, C-terminal	5	955	979	AUCAUCAUAACUUGACCAAGUCUUU	Cleavage
ghy-miRn8	c43965.graph_c0	replication protein A 32 kDa subunit A-like	5	460	481	ACUUGAGAAGCUUUAGAGGUGA	Cleavage
ghy-miRn8	c42452.graph_c2	RER1B-like	5	554	575	AAUUCUCCAGCUUCAGAAGCGU	Cleavage
ghy-miRn8	c49616.graph_c0	Retrovirus-related Pol polyprotein from transposon TNT 1-94	5	3040	3061	CCUUUCUGGGCUUUUCAGGCGA	Cleavage
ghy-miRn8	c50369.graph_c0	Uncharacterized protein	5	2687	2705	CCUUAACUUGAGAUUGUCU	Cleavage
ghy-miRn8	c48980.graph_c1	Uncharacterized protein	5	2203	2224	UUUUCGGAGGCUUCAGAGGCUC	Cleavage
ghy-miRn8	c48911.graph_c0	Uncharacterized protein	5	1898	1919	ACGAUUCACGGGAUCGUAGGUA	Translation
ghy-miRn8	c48851.graph_c0	unnamed protein product	5	1011	1031	UAAUUCUAACCU-CAGAGGCGA	Translation
ghy-miRn8	c89404.graph_c0	unnamed protein product	5	121	142	UAUUCCCAAGCUGGAGAGGUGG	Translation
ghy-miRn8	c21722.graph_c0	unnamed protein product	5	1592	1613	GAUUCUUAAGCUUCAAGGCUGG	Cleavage
ghy-miRn8	c39897.graph_c0	VHS domain-containing protein	5	618	641	ACAUUUUUAUGGACCUCUGGUAGG	Cleavage
ghy-miRn9	c44802.graph_c1	F-box protein SKIP23-like	1.5	106	129	UUAUUCGGAUUAUUUAAAGUUUGU	Cleavage
ghy-miRn9	c45492.graph_c0	signal peptide peptidase-like 2	1.5	627	650	AGGUCUGACAAGUAGAGUGGUUAU	Cleavage
ghy-miRn9	c46674.graph_c1	unnamed protein product	2	1847	1870	GCAUAUGACACGUCCUUGCCAAUA	Cleavage
ghy-miRn9	c46415.graph_c0	Uncharacterized protein	2.5	1283	1306	ACCACUCAUUCGUUCUUGUCAAUU	Cleavage
ghy-miRn9	c49674.graph_c1	hypothetical protein	3	1859	1882	UUGUUUUGUCCACACACAUAAAAU	Cleavage
ghy-miRn9	c40160.graph_c1	lipid droplet-associated hydrolase	3	185	208	AGAAAUCGCACGCUCUUGCUAAUU	Cleavage
ghy-miRn9	c47846.graph_c0	protein CLMP1-like	3	2155	2178	AUUGGUCGUAUGUUCUUGCCAAUA	Cleavage
ghy-miRn9	c47742.graph_c0	protein EXECUTER 1,	3	4720	4743	UUUUUUUAAUUAUGAUAAGUGUUU	Cleavage
ghy-miRn9	c45156.graph_c0	hypothetical protein	3.5	681	704	AUGGUUCACAUUUCCUUGCCCAUU	Cleavage
ghy-miRn9	c45728.graph_c4	protein CELLULOSE SYNTHASE INTERACTIVE 1-like	3.5	4928	4951	GUGCUUUACAGGUUCUUGUCAAUA	Cleavage
ghy-miRn9	c46387.graph_c3	Uncharacterized protein	3.5	509	532	CAGGUUUGCACGUUCUUGCUGAUA	Cleavage
ghy-miRn9	c50589.graph_c0	ABC transporter G family member 6-like	4	1834	1857	GAUCUUCAUACGUCCUCGCUCAUU	Cleavage
ghy-miRn9	c24357.graph_c0	G3BP-like protein	4	108	131	CUUUUUUGCACAUUCUUGCCGGUU	Cleavage
ghy-miRn9	c41438.graph_c0	lipase	4	1263	1286	GCUUUUCGCACAUUCUUGCCAACU	Cleavage
ghy-miRn9	c47801.graph_c0	protein LNK1-like	4	1732	1755	GGAUUUCACAUCUCCUUGCCGAAU	Cleavage
ghy-miRn9	c49214.graph_c0	protein phosphatase 2C 25	4	717	740	AUCUCUCACAUCUUCUUCCCAAUU	Cleavage
ghy-miRn9	c46540.graph_c1	serine/threonine-protein kinase STY13-like	4	1308	1331	UCCAAUAAACUUUACUAAGUUCUU	Cleavage
ghy-miRn9	c48264.graph_c0	Uncharacterized protein	4	520	543	AAUUUUUCUUGAUUGGUAGCAAUU	Translation
ghy-miRn9	c23679.graph_c0	Uncharacterized protein	4	39	62	GGGAUUGAAAUCGGAAACGGAGAG	Cleavage
ghy-miRn9	c47361.graph_c0	BTB/POZ domain-containing protein	4.5	211	235	GGGUUUCAUUGCGUUUUUGCUAAUU	Cleavage
ghy-miRn9	c47678.graph_c0	cytochrome P450 CYP72A219-like	4.5	2129	2152	UUAUUUGUCAACAUCUCUCGUAUA	Cleavage
ghy-miRn9	c24994.graph_c0	far upstream element-binding protein 1	4.5	2833	2853	CUGGAGGGUACCCUGGUCAAC	Cleavage
ghy-miRn9	c39337.graph_c0	hypothetical protein	4.5	269	292	UAUUUUCACAUAUUUUUGACAAUU	Cleavage
ghy-miRn9	c41635.graph_c0	N-alpha-acetyltransferase 35, NatC auxiliary subunit	4.5	1379	1400	CGCUUUGUUGUAGAGUUUCAGA	Translation
ghy-miRn9	c45727.graph_c0	phosphatidylinositol 3-kinase, root isoform	4.5	845	865	UUUUGAACAUCGAGUUGUUCU	Cleavage
ghy-miRn9	c33599.graph_c0	RNA-directed DNA polymerase	4.5	2246	2269	AGAUUUCAAGCUUCUUUGCCAAUC	Cleavage
ghy-miRn9	c49961.graph_c0	Uncharacterized protein	4.5	2239	2262	UUCUCUCAAACGUCUUUUUCAAUC	Cleavage
ghy-miRn9	c25053.graph_c0	Uncharacterized protein	4.5	2562	2585	UGUUUUUAUUCAUCUUUGCUAAUU	Cleavage
ghy-miRn9	c49046.graph_c0	unnamed protein product	4.5	420	443	UUCAAAAAUUAUAAGUUACACAAC	Cleavage
ghy-miRn9	c48604.graph_c1	amino acid transporter family protein	5	356	379	UAUUUUUGCACAUUUUUGCCAACU	Cleavage
ghy-miRn9	c47903.graph_c0	DUF724 domain-containing protein 7-like	5	3040	3061	AUAAUUCCCAUGUUCAUCGAUU	Cleavage
ghy-miRn9	c42431.graph_c0	hypothetical protein	5	1127	1150	UAUUUUUAUGCAUUCUUGCCAACU	Cleavage
ghy-miRn9	c39012.graph_c0	nudix hydrolase 14	5	1182	1205	GGCUUUUAUAAGUUCUUGUUAGUG	Cleavage
ghy-miRn9	c46683.graph_c0	pectinesterase inhibitor 10-like	5	1086	1106	UUAAAAACAGGGAGCUGGGUG	Cleavage
ghy-miRn9	c46106.graph_c0	peptidyl-prolyl cis-trans isomerase FKBP62-like	5	1026	1049	UUCUUUAAAACCUUCUUGUCAGUU	Cleavage
ghy-miRn9	c43520.graph_c0	protein GFS12	5	4916	4935	GGAGUGAGGCCUG-UUUGAGA	Cleavage
ghy-miRn9	c49458.graph_c1	protein trichome birefringence-like	5	3755	3775	CCCAAAUGCGGUCUGGUUCGA	Cleavage
ghy-miRn9	c42354.graph_c0	retrotransposon-realted protein	5	482	505	AUUUUUCAAACGUCUCUGCUUAUU	Cleavage
ghy-miRn9	c45276.graph_c0	Uncharacterized protein	5	1280	1303	UCAUUUCACACGUCUCUGCUAAAC	Cleavage
ghy-miRn10	c49192.graph_c1	unnamed protein product	1.5	2166	2186	CUGCAGCAUCAUCAGGAUUCC	Cleavage
ghy-miRn10	c47032.graph_c4	hypothetical protein	2.5	1298	1321	UCCUCUUUCACUGAGGUCGUGCAU	Cleavage
ghy-miRn10	c42781.graph_c0	GTP diphosphokinase CRSH	3	980	1003	AACUUGUUCCUUGAGAUCGUCUAU	Cleavage
ghy-miRn10	c6237.graph_c0	Retrovirus-related Pol polyprotein from transposon TNT 1-94	3	872	895	GUGAGUUUUACUGGGAUUGUUUAU	Cleavage
ghy-miRn10	c49419.graph_c0	Uncharacterized protein	3	3138	3161	GUUCAUGCCAAAUUUAUCAUCGAU	Cleavage
ghy-miRn10	c31451.graph_c0	disease resistance protein (TIR-NBS-LRR class) family	3.5	189	212	CAUCUCUUGAAUGAGAUCGUGCAU	Cleavage
ghy-miRn10	c50479.graph_c0	disease resistance protein (TIR-NBS-LRR class) family	3.5	1214	1237	CAUGUCUUGAAUGAGAUCGUGCAU	Cleavage
ghy-miRn10	c47151.graph_c0	E3 ubiquitin-protein ligase UPL1-like	3.5	7896	7919	AGCUACUUUGUUGAGAUUCUCCAU	Cleavage
ghy-miRn10	c45259.graph_c1	Pentatricopeptide repeat-containing protein	3.5	2459	2482	CAAAUCUUCACUGAAAUCGUCUGA	Translation
ghy-miRn10	c47902.graph_c0	protein ANTI-SILENCING 1	3.5	135	158	CGCUGCUUCACUGCGGUCGCCCAU	Translation
ghy-miRn10	c48527.graph_c1	DnaJ domain-containing protein	4	154	177	UGGUGUUUCACAGAGAUCGUUCGA	Cleavage
ghy-miRn10	c42669.graph_c0	eukaryotic translation initiation factor 5B-like	4	899	922	CUUUUCUUCCUUGAGAUUAUCUAU	Cleavage
ghy-miRn10	c46162.graph_c0	hypothetical protein	4	4585	4608	UGGGUGGUAGUGUAGCUGGUAGUU	Cleavage
ghy-miRn10	c36655.graph_c0	protein CHROMATIN REMODELING 35-like	4	1540	1563	AAAAUUUUUAUUGAGGUUGACCAU	Cleavage
ghy-miRn10	c24866.graph_c0	putative protein E6	4	86	109	AAGUUCUUCACUAAGGUCAUUCAU	Cleavage
ghy-miRn10	c40866.graph_c0	SPIRRIG-like	4	804	827	GAUUUCUCCAGUGAGUUCGUUCAU	Cleavage
ghy-miRn10	c45082.graph_c0	Uncharacterized protein	4	1809	1832	CUGCUCUUUGUUGUGAUCGUCUGU	Translation
ghy-miRn10	c38818.graph_c0	Uncharacterized protein	4	243	266	AAACUUCUAUAUAAACGGUGUUUC	Cleavage
ghy-miRn10	c29880.graph_c0	unnamed protein product	4	412	435	GGUCUUUGCACUGAGGUUGACCAU	Cleavage
ghy-miRn10	c44240.graph_c0	ABC transporter C family member 8-like	4.5	891	914	UGAUUUUUCACUGAGUUUGUGUAU	Cleavage
ghy-miRn10	c48878.graph_c1	callose synthase 5-like	4.5	735	755	GCUUGAUAGUCGAGCUGUUGA	Cleavage
ghy-miRn10	c46971.graph_c1	eamA domain, WAT1-related protein	4.5	20	43	CAUCUCUUCGUUAAGAUUGUUUGU	Cleavage
ghy-miRn10	c33066.graph_c0	G-type lectin S-receptor-like serine/threonine-protein kinase	4.5	316	339	CAUAUCUUCACUGUGCUUGUCCAC	Translation
ghy-miRn10	c45384.graph_c0	homeobox-leucine zipper protein HDG11-like	4.5	948	970	GAUCUUCUCACUG-GAUCGUCCAU	Translation
ghy-miRn10	c17285.graph_c0	hypothetical protein	4.5	88	111	UGCUUCUUCGAUGAGAUCGUGUAA	Cleavage
ghy-miRn10	c36796.graph_c0	hypothetical protein	4.5	305	328	GUAUUCUUUGCUAAGAUCGUUAAU	Cleavage
ghy-miRn10	c46623.graph_c0	hypothetical protein	4.5	302	325	CGCCUCUUCAUUGGGAUUGAUUGU	Cleavage
ghy-miRn10	c46623.graph_c0	hypothetical protein	4.5	302	325	CGCCUCUUCAUUGGGAUUGAUUGU	Cleavage
ghy-miRn10	c49607.graph_c0	hypothetical protein	4.5	1787	1810	UACUUCCAUAUUGAGAUCGUUUGU	Cleavage
ghy-miRn10	c40922.graph_c0	MYB4-like transcription factor	4.5	153	176	CGAUUUUUCACUGACUUUGUCUAU	Translation
ghy-miRn10	c49408.graph_c0	myosin-6	4.5	691	714	CCUUUCCUCACUGAGUUUGUUUGU	Cleavage
ghy-miRn10	c48325.graph_c0	RNA helicase aquarius	4.5	2073	2096	UAUUUUUUCAAAGAGAUCGUUCAG	Cleavage
ghy-miRn10	c31747.graph_c0	RNA-directed DNA polymerase	4.5	11	34	UUUUUUUUUUUUGAGAUUGUUCAG	Cleavage
ghy-miRn10	c49075.graph_c0	Uncharacterized protein	4.5	1027	1051	CGUGGAAGCUAAGGUAUCAGAUCUU	Cleavage
ghy-miRn10	c34396.graph_c0	ADP-ribosylation factor 1	5	17	40	UUUUUUUUCAUUGAGUUUAUUCAU	Cleavage
ghy-miRn10	c15451.graph_c0	AP-4 complex subunit sigma	5	225	248	UGUUUCUUCGUCGGAAUCGUCUAU	Translation
ghy-miRn10	c43464.graph_c0	casein kinase 1-like protein 11	5	2261	2284	CCUUUUUUUAAUGAGAUUGUUGGU	Cleavage
ghy-miRn10	c60799.graph_c0	cysteine proteinase inhibitor B-like	5	213	236	AAUUUUAUCGCAGAGGUCGUUCGU	Cleavage
ghy-miRn10	c49713.graph_c0	LRR receptor-like serine/threonine-protein kinase	5	358	381	AUCUUCUUCAUUCGGCUUGUUCAU	Cleavage
ghy-miRn10	c42103.graph_c1	quinoprotein alcohol dehydrogenase-like superfamily	5	40	63	CAUUUCUUCGCUGAAGUUUUCCGU	Translation
ghy-miRn10	c38282.graph_c0	receptor-like kinase TMK4	5	52	75	AUUUUCUUCGCUGAAAUUAUUCGU	Translation
ghy-miRn10	c38370.graph_c0	Retrovirus-related Pol polyprotein from transposon RE1	5	629	653	AAUAUCUUUGUUGUGGAUCGUCCAU	Translation
ghy-miRn10	c12538.graph_c0	ubiquitin-conjugating enzyme E2 22	5	498	521	UAUUUUUUGACUAAGAUUUUCCAU	Cleavage
ghy-miRn10	c47659.graph_c0	Uncharacterized protein	5	683	707	AUGUUUUUCAUUGAGAGUCGUUUAU	Cleavage
ghy-miRn10	c42080.graph_c0	Uncharacterized protein	5	1434	1457	UAGUUCUUCUCUAAGAUCGAUUAU	Cleavage
ghy-miRn10	c38258.graph_c0	Uncharacterized protein	5	90	113	GAUUUCUUCAAUUAGGCCGUUCAU	Cleavage
ghy-miRn10	c28148.graph_c0	uncharacterized protein	5	153	176	AAUCUCUUCAUUGAGAUUGUCAUU	Cleavage
ghy-miRn10	c50264.graph_c0	unnamed protein product	5	1162	1185	AUUUUCUUCACUGAAGUUUUUCGU	Translation
ghy-miRn10	c75666.graph_c0	WAT1-related protein	5	295	319	UAUCUUUUUCGCUGAGACUUUUCAU	Cleavage
ghy-miRn11	c46819.graph_c1	transmembrane 9 superfamily member 7-like	0	1827	1850	UUCAAAAACUGUAAGUCACUCAAU	Cleavage
ghy-miRn11	c46819.graph_c1	transmembrane 9 superfamily member 7-like	0	1827	1850	UUCAAAAACUGUAAGUCACUCAAU	Cleavage
ghy-miRn11	c45448.graph_c0	hypothetical protein	0.5	941	964	ACAAAAAACUGUAGGUCACUCAAU	Cleavage
ghy-miRn11	c44515.graph_c1	tetratricopeptide-like helical	1	470	493	AUGAGAAGUUGUAAGUCACUCAAU	Cleavage
ghy-miRn11	c40807.graph_c0	DEAD-box ATP-dependent RNA helicase 7	1.5	928	951	AAUAAAAAAUGUAAGUCACUCGAU	Cleavage
ghy-miRn11	c47267.graph_c6	Protein dehydration-induced 19	1.5	879	902	UUCAAAAAUUGUGAGUCACUCGAU	Cleavage
ghy-miRn11	c47267.graph_c6	Protein dehydration-induced 19	1.5	879	902	UUCAAAAAUUGUGAGUCACUCGAU	Cleavage
ghy-miRn11	c45717.graph_c1	Uncharacterized protein	1.5	224	247	AUCAAAAAUUUUAAGUCACUCAAU	Cleavage
ghy-miRn11	c45717.graph_c1	Uncharacterized protein	1.5	224	247	AUCAAAAAUUUUAAGUCACUCAAU	Cleavage
ghy-miRn11	c41302.graph_c0	unnamed protein product	1.5	1242	1265	AUAAAAAACUAUAAGUUACUCAAU	Cleavage
ghy-miRn11	c41096.graph_c0	annexin D5-like	2	1262	1285	AUAAGAAGUUGUAAGUCAUUUAAU	Cleavage
ghy-miRn11	c49638.graph_c0	Uncharacterized protein	2	4168	4191	AAAAAAAAUUGUAAGUCACCCAAU	Cleavage
ghy-miRn11	c89051.graph_c0	1-aminocyclopropane-1-carboxylate oxidase homolog 1	2.5	25	48	AUAAAAAAUUGUAAGUCUCUUAAU	Cleavage
ghy-miRn11	c48659.graph_c0	inactive receptor-like serine/threonine-protein kinase	2.5	40	63	AACAAAAACUGCAAGUCACUUGAU	Cleavage
ghy-miRn11	c46193.graph_c0	Membrane-anchored ubiquitin-fold protein	2.5	5	28	AUCAAAAGUUGUAAGUCAUUCAAA	Cleavage
ghy-miRn11	c46193.graph_c0	Membrane-anchored ubiquitin-fold protein	2.5	5	28	AUCAAAAGUUGUAAGUCAUUCAAA	Cleavage
ghy-miRn11	c46193.graph_c0	Membrane-anchored ubiquitin-fold protein	2.5	5	28	AUCAAAAGUUGUAAGUCAUUCAAA	Cleavage
ghy-miRn11	c39527.graph_c0	Uncharacterized protein	2.5	2314	2337	UCAAAAAACUUAAAGUCACUCAAU	Cleavage
ghy-miRn11	c45174.graph_c0	1-deoxy-D-xylulose 5-phosphate reductoisomerase	3	1084	1107	UUCAAAAAUUAUAAUUCACUCAAU	Translation
ghy-miRn11	c43695.graph_c0	adagio protein 1-like	3	210	233	UUCAAAAAACUUAAGUCACUCAAU	Cleavage
ghy-miRn11	c47627.graph_c2	glutaminyl-peptide cyclotransferase	3	94	117	AUAAAAAAAUGUAUGUCGCUCAAU	Translation
ghy-miRn11	c45055.graph_c1	kinesin-like protein KIN-12B	3	98	121	AUAAAAAAGUGUGAGUCACUCUAU	Cleavage
ghy-miRn11	c38109.graph_c0	RNA-directed DNA polymerase	3	2082	2105	UUGAAAAACUUAAAGUCACUCGAU	Cleavage
ghy-miRn11	c46448.graph_c0	SHOOT GRAVITROPISM 5-like	3	464	487	AUCCAAAAUUUUAAAUCACUCAAU	Translation
ghy-miRn11	c44782.graph_c0	65-kDa microtubule-associated protein 1-like	3.5	2916	2939	UUUGAUAAUUGUAAGUCCUUCAAU	Cleavage
ghy-miRn11	c48047.graph_c0	ABC transporter A family member 2-like	3.5	38	61	UUCAAAAACCAUAAAUCACUCAAU	Translation
ghy-miRn11	c28067.graph_c0	importin-4-like	3.5	364	387	AUCUGGAACUGUGAGUUGUUUGAU	Cleavage
ghy-miRn11	c42907.graph_c0	NADH-ubiquinone oxidoreductase 24 kDa subunit	3.5	215	238	AUUAAAAUUUGUACGUCACUCGAU	Translation
ghy-miRn11	c49314.graph_c0	Uncharacterized protein	3.5	3935	3958	CUCAACAGCUGUAAGCCACUCGAU	Cleavage
ghy-miRn11	c53897.graph_c0	unnamed protein product	3.5	647	670	GUUAAAAAAUGUAAUUCGCUUAAU	Translation
ghy-miRn11	c50197.graph_c0	60S ribosomal protein L12	4	2705	2728	UUUAAGAAUUGUAGGUCAUUUAUU	Cleavage
ghy-miRn11	c45459.graph_c0	DENN domain and WD repeat-containing protein SCD1	4	1466	1489	UUCAGAAGCUAUAUGUCAUUUAAU	Translation
ghy-miRn11	c45609.graph_c2	RAN GTPase-activating protein 1-like	4	217	240	AUCAAAUAUUUUAAGUCCCUCAAU	Cleavage
ghy-miRn11	c46026.graph_c0	Uncharacterized protein	4	46	69	AUAAAAAAGUGUAAAUCACUCACU	Translation
ghy-miRn11	c18520.graph_c0	hypothetical protein	4.5	346	369	CUCAAGAAUUGCAAGUCGAUCAAU	Cleavage
ghy-miRn11	c46424.graph_c3	KNOX1-like protein	4.5	537	560	UAAUUAUAUCAAGCUAGAUGGCAU	Cleavage
ghy-miRn11	c48295.graph_c1	lysine-specific demethylase JMJ706-like	4.5	52	75	AUCAACAAUUACAAGUCACUUAAU	Cleavage
ghy-miRn11	c45735.graph_c0	pre-mRNA-processing protein 40A-like	4.5	2623	2645	AUCAAUAAUUGUAAGUC-CUCAAU	Cleavage
ghy-miRn11	c45735.graph_c0	pre-mRNA-processing protein 40A-like	4.5	2623	2645	AUCAAUAAUUGUAAGUC-CUCAAU	Cleavage
ghy-miRn11	c44227.graph_c2	R3H domain-containing protein 2-like	4.5	525	548	AUCCAGAAUCAUAAGUCAGUCAAU	Cleavage
ghy-miRn11	c49551.graph_c0	RDM16	4.5	43	63	GGUAUGUAUUCUUCUUCUCCA	Cleavage
ghy-miRn11	c44912.graph_c1	Uncharacterized protein	4.5	341	364	AUCAAAAUUUACAAGUCACUCAGU	Cleavage
ghy-miRn11	c49046.graph_c0	unnamed protein product	4.5	420	443	UUCAAAAAUUAUAAGUUACACAAC	Cleavage
ghy-miRn11	c45696.graph_c0	E3 ubiquitin ligase PARAQUAT TOLERANCE 3-like	5	1520	1540	GGGUUCACAGGGGGAUAGGCA	Cleavage
ghy-miRn11	c18968.graph_c0	hypothetical protein	5	1305	1328	AUUAAAACUUGUUAGUCAUUUAAC	Cleavage
ghy-miRn11	c49458.graph_c1	protein trichome birefringence-like	5	3755	3775	CCCAAAUGCGGUCUGGUUCGA	Cleavage
ghy-miRn11	c49458.graph_c1	protein trichome birefringence-like	5	3755	3775	CCCAAAUGCGGUCUGGUUCGA	Cleavage
ghy-miRn11	c47619.graph_c3	ras-related protein Rab11C-like	5	242	265	AUCUAAAGUUGUAAAUCACUCACA	Translation
ghy-miRn11	c50071.graph_c0	scarecrow-like protein 21	5	2145	2168	AUCAAAAACUAUGAGUAAUUAAAU	Cleavage
ghy-miRn11	c45870.graph_c0	type IV inositol polyphosphate 5-phosphatase 7	5	1626	1648	AUGUAACCAAUCAUCAAGAUUCA	Cleavage
ghy-miRn11	c44414.graph_c1	unnamed protein product	5	1247	1271	AUCAAAAAAUUGUAAAUUACUCGAU	Translation
ghy-miRn12	c45540.graph_c0	Uncharacterized protein	2.5	2347	2370	AGUCAAAACCGAACCGAACCGGAA	Cleavage
ghy-miRn12	c44548.graph_c0	casein kinase 1-like protein 10	3	791	814	CCGGCUUGACCGGCCUUCGGUUGC	Cleavage
ghy-miRn12	c57417.graph_c0	hypothetical protein	3	271	294	GCUAUUUGAAAGCCCUCUGGUUGU	Cleavage
ghy-miRn12	c24143.graph_c0	BEL1-like homeodomain protein 4	3.5	1097	1120	UUCAGUCGCCGGACCUCCGGUUGG	Cleavage
ghy-miRn12	c49938.graph_c0	beta-glucosidase 18-like	3.5	1732	1755	GGGCAUUGCCAUAUUUCCGGUUGU	Cleavage
ghy-miRn12	c50855.graph_c0	BOI-related E3 ubiquitin-protein ligase 3	3.5	67	90	ACGAAUUGAUCGAUCUCCAGUUGU	Cleavage
ghy-miRn12	c43816.graph_c0	CBS domain-containing protein CBSX6	3.5	1324	1347	GCCAUUUGAUGGAUUUCCGAUUGU	Cleavage
ghy-miRn12	c49763.graph_c0	CRS2-associated factor 1	3.5	18	41	CGGUUUUGACGGGCUUUCGGUUUU	Cleavage
ghy-miRn12	c46130.graph_c0	E3 ubiquitin-protein ligase BRE1-like 2	3.5	1318	1341	GCAGAUUGAUAGGUCUUCGGUUAU	Cleavage
ghy-miRn12	c48944.graph_c0	glycine-rich domain-containing protein 1	3.5	1011	1034	GGUCACUAACGGACCUUUGGUUGU	Cleavage
ghy-miRn12	c19830.graph_c0	RNA-directed DNA polymerase	3.5	89	112	GGUAUUUGAAAGCCUUCUGGUUGU	Cleavage
ghy-miRn12	c49359.graph_c0	5-amino-6-(5-phospho-D-ribitylamino)uracil phosphatase	4	475	498	GCGGCUUGAUGAGCUUUCGGUUGU	Cleavage
ghy-miRn12	c55298.graph_c0	berberine bridge enzyme-like 24	4	54	77	CUACAUUGACAGACCUCAUGUUGA	Cleavage
ghy-miRn12	c39734.graph_c0	Fatty acid desaturase, type 1, core	4	522	545	AUUCUUUGACAGAUCGUCGGUUUU	Cleavage
ghy-miRn12	c42253.graph_c0	hypothetical protein	4	1464	1484	AACUUAGGACAAUGAUUAAAA	Cleavage
ghy-miRn12	c32421.graph_c0	NEN4 protein	4	522	544	ACCUGUUG-UAGACUUCCGGUUGG	Cleavage
ghy-miRn12	c49867.graph_c1	protein JINGUBANG-like	4	1386	1409	CGACCUUGACGGAGAUCUGGUUGU	Translation
ghy-miRn12	c44681.graph_c0	replication protein A 70 kDa DNA-binding subunit B	4	683	706	GUACAUUGACCGACCUCCAGUUUU	Cleavage
ghy-miRn12	c50273.graph_c0	Retrovirus-related Pol polyprotein from transposon TNT 1-94	4	3142	3165	ACCGGUUGAUAGGUUGUCGGUUGU	Cleavage
ghy-miRn12	c47496.graph_c0	S-adenosyl-l-methionine decarboxylase leader peptide	4	1283	1306	AUGACUUGACGGGUCUCGGGUUGG	Cleavage
ghy-miRn12	c37648.graph_c0	thioredoxin-like 1-2	4	280	303	GCUAGUUGACAGAUCUUUGGAUGC	Cleavage
ghy-miRn12	c44952.graph_c0	two pore calcium channel protein 1B	4	2853	2876	AUUGGUUUACAGACCUUCGGUGGG	Cleavage
ghy-miRn12	c44834.graph_c1	Uncharacterized protein	4	495	518	UGAUCUUGACGGGCCUCCGUUUCU	Cleavage
ghy-miRn12	c801.graph_c0	uncharacterized protein	4	799	822	AAUUGUUGGCGUACCUCCGGAUGU	Cleavage
ghy-miRn12	c35516.graph_c0	Aldehyde dehydrogenase, conserved site-containing protein	4.25	1723	1748	UGUACCUACACUCAUAAAGAGGGCGU	Cleavage
ghy-miRn12	c40067.graph_c0	Aux/IAA-ARF-dimerization	4.5	1673	1696	AGUGGUUGGCUGGCCUCCGGUUAG	Cleavage
ghy-miRn12	c33592.graph_c0	cytochrome c, class IA/ IB	4.5	994	1017	UUUAUAUGUCAAAUUAGUUGUUCU	Cleavage
ghy-miRn12	c46374.graph_c1	disease resistance protein	4.5	3101	3123	UGAUGUUGACAAACCUCCG-UUGU	Cleavage
ghy-miRn12	c90607.graph_c0	hypothetical protein	4.5	138	162	GCUGUCAAAUCACUGACAAGUGUUU	Translation
ghy-miRn12	c49985.graph_c0	hypothetical protein	4.5	1519	1542	UGUAGUUGAUGAAUCUCCGGUUCU	Cleavage
ghy-miRn12	c54497.graph_c0	hypothetical protein	4.5	332	355	AGUUGUUGUCGGAGCUCCGGGUGU	Translation
ghy-miRn12	c39627.graph_c0	NAC domain-containing protein 7-like	4.5	1338	1361	AUGGGUUCACAGACCUCUGUUAGU	Cleavage
ghy-miRn12	c42946.graph_c0	Pentatricopeptide repeat-containing protein	4.5	266	287	CGUCGUUUUUUUCAGUUCCAGU	Translation
ghy-miRn12	c46395.graph_c0	Pentatricopeptide repeat-containing protein	4.5	834	857	ACAUAAUGAGAGACCUCCGGUUCG	Cleavage
ghy-miRn12	c14418.graph_c0	Phosphoesterase domain-containing protein	4.5	814	837	CAAAGUUGACGGAUCUCUGUUUCU	Cleavage
ghy-miRn12	c43271.graph_c1	protein CONSERVED IN THE GREEN LINEAGE AND DIATOMS 27	4.5	720	742	ACGCCUUGG-AGGCCUCUGGUUGG	Cleavage
ghy-miRn12	c40256.graph_c0	RNA-directed DNA polymerase	4.5	557	580	ACCCGUUGGUAAACCGUCGGUUGU	Cleavage
ghy-miRn12	c43987.graph_c1	sister chromatid cohesion 1 protein 4	4.5	2436	2459	AUUAGUUGGCAGAUCUUCAGUUCU	Cleavage
ghy-miRn12	c38656.graph_c0	Uncharacterized protein	4.5	943	966	UAACUUUGAUGGAUUUUUGUUUGU	Cleavage
ghy-miRn12	c46555.graph_c0	Uncharacterized protein	4.5	315	338	AUUCUUUGAUAUAUCUUCGGGUGU	Cleavage
ghy-miRn12	c46124.graph_c0	unnamed protein product	4.5	20	43	UCAAGGAAACAGAGCUCCGGUUGU	Translation
ghy-miRn12	c39943.graph_c0	agamous-like MADS-box protein AGL11	5	863	886	ACACUUUGUGACAUUUUCGGUUGU	Cleavage
ghy-miRn12	c41949.graph_c0	alpha-mannosidase	5	1863	1886	UGACGUUAUAAGAAUUCCGGUUGU	Translation
ghy-miRn12	c49090.graph_c0	E12 ubiquitin-protein ligase	5	1145	1168	AUAUGUGGACAGGCCUUUUGUUGG	Cleavage
ghy-miRn12	c37296.graph_c0	F-box protein	5	168	191	AUAUAUUGGUUGAUCACCGGUUGG	Cleavage
ghy-miRn12	c12551.graph_c0	histidine triad (HIT) protein	5	602	625	CAUCGUUGAUGGAUUUCGUGUUGU	Cleavage
ghy-miRn12	c3739.graph_c0	leucine-rich repeat receptor-like serine/threonine-protein kinase	5	135	159	CACCCCUGACAGAUCCUUUGGUUGU	Translation
ghy-miRn12	c48515.graph_c0	LONGIFOLIA 1-like	5	4624	4647	GCACUUUGAUCGACCCUGGGUUGU	Cleavage
ghy-miRn12	c48533.graph_c2	LRR receptor-like serine/threonine-protein kinase	5	1868	1891	AAGAGUUGACAGAGUUGUGGUUGA	Translation
ghy-miRn12	c50390.graph_c1	midasin	5	1295	1318	AUGAGUUUGCAGACCUUUGGAUGA	Cleavage
ghy-miRn12	c45822.graph_c0	polygalacturonase	5	1603	1626	CACCGUUUACAGACAUUUGUUUGU	Translation
ghy-miRn12	c59087.graph_c0	RNA-directed DNA polymerase	5	277	301	UCAUAUUAGACAGGCUUUUGGUUGA	Cleavage
ghy-miRn12	c47166.graph_c1	ROOT PRIMORDIUM DEFECTIVE 1-like	5	2480	2503	GAGGUAGUACCCAAAUGGUGUUUC	Cleavage
ghy-miRn12	c39704.graph_c0	solute carrier family 25 member 44-like	5	1070	1093	UGGUGUUGGGAGACCUUCUGUUAU	Cleavage
ghy-miRn12	c42522.graph_c0	U3 small nucleolar RNA-associated protein 6 homolog	5	2106	2129	CGGCGGUGGGAGGCCUCUGCUUGU	Cleavage
ghy-miRn12	c40323.graph_c0	Uncharacterized protein	5	1151	1174	UCACAUUAAUGGAUCUUUGUUUGU	Cleavage
ghy-miRn12	c21301.graph_c0	unnamed protein product	5	339	362	UAGGGUUGGCGCAUUUCUGGUUGA	Cleavage
ghy-miRn12	c39897.graph_c0	VHS domain-containing protein	5	618	641	ACAUUUUUAUGGACCUCUGGUAGG	Cleavage
ghy-miRn13	c19658.graph_c0	unnamed protein product	1.5	161	181	UGCUUCAUAGAGAGGAACACA	Cleavage
ghy-miRn13	c49445.graph_c0	hypothetical protein	2.5	2647	2670	AGGUAUAUAUGUUCAAAGCACAGC	Cleavage
ghy-miRn13	c47468.graph_c0	RNA-directed DNA polymerase	2.5	12	35	UCAGAAAACCGGACCGAACCGAAA	Cleavage
ghy-miRn13	c45634.graph_c0	Uncharacterized protein	2.5	1716	1736	UGCUUCAUAGAGAGGAACACC	Cleavage
ghy-miRn13	c31817.graph_c1	Uncharacterized protein	2.5	7	27	CGCUUCAUAAAGAGGAACACC	Cleavage
ghy-miRn13	c48679.graph_c0	zinc finger MYM-type protein 1	2.5	3861	3881	GUCUUCUUUUAGAGGAACACA	Cleavage
ghy-miRn13	c25800.graph_c0	3beta-hydroxysteroid-dehydrogenase/decarboxylase-like	3	334	353	UACUUC-UAUGGAGGAACGCA	Cleavage
ghy-miRn13	c51710.graph_c0	NAC domain-containing protein 7	3	415	435	CACUUCAAAUGGAUGAACACA	Cleavage
ghy-miRn13	c47895.graph_c0	NADH-plastoquinone oxidoreductase subunit 2	3	2057	2077	CUCUACGGAUAGAGGAAUACA	Cleavage
ghy-miRn13	c49600.graph_c1	phosphate transporter PHO1 homolog 9	3	1021	1041	AAUCUUAUAUAGAGGAGCACA	Cleavage
ghy-miRn13	c49991.graph_c0	protein CHROMATIN REMODELING 4-like	3	4631	4651	UGUUUCAUAUAGAGAAGCAUA	Cleavage
ghy-miRn13	c45534.graph_c0	serine/arginine-rich SC35-like splicing factor SCL30A	3	815	835	CUCUUCAUAUUGAAGAACACA	Translation
ghy-miRn13	c40952.graph_c0	Uncharacterized protein	3	1354	1374	UGCAUCGUAUAAAGGAACACA	Translation
ghy-miRn13	c28821.graph_c0	coiled-coil domain-containing protein 22	3.5	1652	1672	CACUUUAUAGAGAAGAACACA	Cleavage
ghy-miRn13	c72671.graph_c0	disease resistance protein RGA4	3.5	79	99	AAUUUCAAAUGGAGGAGUGCA	Cleavage
ghy-miRn13	c44823.graph_c0	LL-diaminopimelate aminotransferase	3.5	1608	1628	CACUGUAUAUGGAGGAAAACA	Cleavage
ghy-miRn13	c42461.graph_c0	serine/threonine-protein kinase CDG1-like	3.5	1315	1335	CAUUUCAUAUGUAGGGACAUA	Translation
ghy-miRn13	c42818.graph_c0	Uncharacterized protein	3.5	1008	1028	UCCCUCAUGUGGAGCAACACA	Cleavage
ghy-miRn13	c45642.graph_c0	Uncharacterized protein	3.5	285	305	AGCUUGAUAUAGAGGAAAGUA	Cleavage
ghy-miRn13	c41299.graph_c1	unnamed protein product	3.5	475	495	UUCUUGAUGAAGAGGAGCACA	Cleavage
ghy-miRn13	c45668.graph_c0	vacuolar-sorting receptor 1-like	3.5	1930	1950	UCCUCCAUAUUGAGGAACACC	Translation
ghy-miRn13	c73882.graph_c0	60S ribosomal protein L33-B	4	269	289	AUCUUUAAGUAGGGGAACAUU	Cleavage
ghy-miRn13	c29609.graph_c0	BAG family molecular chaperone regulator 6	4	2352	2372	AGCUUAAUAUGGAGAAGCAUA	Cleavage
ghy-miRn13	c46284.graph_c0	BTB and TAZ domain protein 4	4	1458	1476	GUUCCACCUGAGGCUGUUC	Cleavage
ghy-miRn13	c43497.graph_c0	callose synthase 3	4	3706	3726	UGAAUCGUAUAGAGGAGCACU	Cleavage
ghy-miRn13	c37859.graph_c0	E3 ubiquitin-protein ligase RING1-like	4	29	49	CUCUUCAUAUAUAUGAAUAUA	Translation
ghy-miRn13	c44982.graph_c0	enoyl-CoA hydratase 2	4	306	326	CUUUUUGUGUAAAGGAACAUA	Translation
ghy-miRn13	c87731.graph_c0	hypothetical protein	4	223	243	GUCUUCAUCUAGAGGAAGACU	Cleavage
ghy-miRn13	c38746.graph_c0	hypothetical protein	4	631	651	AGCUUGAAAUAGGAGAACACA	Cleavage
ghy-miRn13	c29772.graph_c0	kinesin-like protein KIN-7N	4	1044	1063	AGGUUCAUAUAGAGGAA-ACA	Cleavage
ghy-miRn13	c41789.graph_c0	nucleobase-ascorbate transporter 10	4	1116	1136	GGUUACAUAUGGAGGAAGAUA	Cleavage
ghy-miRn13	c922.graph_c1	pelargonidin 3-O-(6-caffeoylglucoside) 5-O-(6-O-malonylglucoside) 4-malonyltransferase-like	4	372	392	AGCUUCAUAUAAGGGAACUUA	Translation
ghy-miRn13	c48873.graph_c0	RNA polymerase III RPC4	4	339	359	UUCUUCAUAUGCAGGAGCGCC	Translation
ghy-miRn13	c45867.graph_c1	RNA-directed DNA polymerase	4	4084	4104	CGUGAUUACACUCUUCUGUCC	Cleavage
ghy-miRn13	c50293.graph_c2	Uncharacterized protein	4	7901	7921	UCCAUCAUAUGGCGGAACACC	Cleavage
ghy-miRn13	c39792.graph_c0	Uncharacterized protein	4	2876	2896	UGCUUUGUACAUAGGAACACA	Translation
ghy-miRn13	c48946.graph_c0	Uncharacterized protein	4	455	475	UUCUUUGUAUAAAGGGACAUG	Translation
ghy-miRn13	c14884.graph_c0	uncharacterized protein	4	137	157	AGUUUCAGGUAGGGGAAUAUG	Cleavage
ghy-miRn13	c37317.graph_c0	unnamed protein product	4	412	432	UCUUUCAUAUCAAGGAACAUA	Translation
ghy-miRn13	c23775.graph_c0	unnamed protein product	4	373	393	UGCUUCUGGUAAAGGAACACA	Translation
ghy-miRn13	c49979.graph_c1	ATP-dependent RNA helicase-like protein DB10	4.5	2666	2686	UGCUGGUUCUUUGCUUUUCCA	Cleavage
ghy-miRn13	c45598.graph_c0	beta-galactosidase-like	4.5	2450	2469	UGCUUUA-AUGGAGGAACAAA	Cleavage
ghy-miRn13	c45931.graph_c0	CDPK-related kinase 5-like	4.5	501	521	UGCUUCAAGUUGAUGAACACA	Translation
ghy-miRn13	c46598.graph_c0	E3 ubiquitin-protein ligase	4.5	2785	2805	CCCUUCGUGUAGAGGAGCGAU	Cleavage
ghy-miRn13	c20483.graph_c0	exocyst complex component EXO84B-like	4.5	578	600	CGUCAAAG-GAGAUAUCAGAUUUA	Cleavage
ghy-miRn13	c54684.graph_c0	GDSL esterase/lipase	4.5	316	336	CUUUGCAUAUGGAGGAACAGG	Cleavage
ghy-miRn13	c31952.graph_c0	hypothetical protein	4.5	949	969	AUGUUCAUAGAGAUGAACAUA	Cleavage
ghy-miRn13	c41126.graph_c1	hypothetical protein	4.5	577	597	GGCUUCAAACGGAGGAACCCA	Cleavage
ghy-miRn13	c47519.graph_c1	hypothetical protein	4.5	1779	1799	ACCAACAUAUAGAGUAACACA	Cleavage
ghy-miRn13	c45434.graph_c0	hypothetical protein	4.5	704	724	AAUGUUAUGUGGAGGAAUAUA	Cleavage
ghy-miRn13	c46279.graph_c0	isoleucine--tRNA ligase	4.5	1724	1744	GGCUCUAUCUAGAGGAACAAA	Cleavage
ghy-miRn13	c45507.graph_c0	mitochondrial protein	4.5	55	75	UGAUGCAUAUGGGGGAGUAUA	Cleavage
ghy-miRn13	c49470.graph_c0	NETWORKED 1D-like protein	4.5	131	151	AGCUGCAUAUAGGCGAAAACA	Cleavage
ghy-miRn13	c53528.graph_c0	Pentatricopeptide repeat-containing protein	4.5	433	453	AGCAUUAUGUGAAGGGACACA	Translation
ghy-miRn13	c42489.graph_c0	protein CHROMATIN REMODELING 4-like	4.5	2197	2217	AGUUUCUUAUAGGGAAGCAUA	Cleavage
ghy-miRn13	c49199.graph_c0	protein transport protein Sec24-like	4.5	3377	3397	UGUUGCAUGUAGAGGAGUAUC	Cleavage
ghy-miRn13	c47058.graph_c0	RTE1-HOMOLOG-like	4.5	1028	1049	UGCUUGCAUAUGUAGGAAUACA	Translation
ghy-miRn13	c12646.graph_c0	SCAR2	4.5	874	897	AAAGAUAAGGUUGACCAAGUCAAA	Cleavage
ghy-miRn13	c44226.graph_c0	SWI/SNF-related matrix-associated actin-dependent regulator of chromatin subfamily A member 3-like 1	4.5	1594	1614	AGCUUUCUAUAGAUGAGCGUA	Cleavage
ghy-miRn13	c25707.graph_c0	unnamed protein product	4.5	208	228	UGCUUCAUACAAGGGAACACU	Translation
ghy-miRn13	c48539.graph_c3	unnamed protein product	4.5	2960	2980	CGCUUUAUAAGGAGGAACUCG	Cleavage
ghy-miRn13	c20486.graph_c0	unnamed protein product	4.5	523	543	GGAUUCAUGUGGAGGGAAGCA	Cleavage
ghy-miRn13	c44844.graph_c0	autophagy-related protein 18h-like	5	1542	1562	AGUUUCAUCUAGGGGCACAUG	Cleavage
ghy-miRn13	c36835.graph_c0	BTB/POZ domain-containing protein	5	168	191	ACUGUUAAUGCUUGCAAAUGGCGU	Cleavage
ghy-miRn13	c45051.graph_c0	Clathrin adaptor, mu subunit, C-terminal	5	1601	1621	UGGUUAAUGUGGAGGAAUAUU	Cleavage
ghy-miRn13	c49684.graph_c0	dnaJ homolog subfamily C GRV2	5	2255	2275	AGCUUCAUAUAGGAAGACAUG	Cleavage
ghy-miRn13	c72353.graph_c0	hypothetical protein	5	144	164	UGUUCCAUAAAGAUGAGCACA	Cleavage
ghy-miRn13	c50401.graph_c0	hypothetical protein	5	137	157	UGUUUGAUAUAGAGGAUUCCA	Cleavage
ghy-miRn13	c46220.graph_c0	inositol monophosphatase family protein	5	1558	1576	UGUUUACCUUGGAUUAUUC	Translation
ghy-miRn13	c30559.graph_c1	phosphoinositide phosphatase SAC1	5	718	738	UGCCUCAUAUGUAGGAUCAUA	Translation
ghy-miRn13	c47545.graph_c1	proteasome activator subunit 4	5	5042	5062	AGCUUUAUGUAUAGGCACACU	Translation
ghy-miRn13	c43599.graph_c1	ribosome-binding factor PSRP1	5	2898	2914	UGUC--CCUGAGAUUGUUC	Cleavage
ghy-miRn13	c37539.graph_c0	shaggy-related protein kinase kappa-like	5	429	449	GGCUUUAUUUGGGGGAACCUA	Cleavage
ghy-miRn13	c43526.graph_c0	squamosa promoter-binding-like protein 6	5	1694	1714	UGCUUCAAUUGUGGGAACACA	Translation
ghy-miRn13	c44953.graph_c0	sucrose nonfermenting 4-like protein	5	85	105	AGCUUUAUAUUGGAGAACGUA	Translation
ghy-miRn13	c43286.graph_c0	U-box domain-containing protein 26	5	948	968	CGCUUUGUUUAGGGGAGCUCA	Cleavage
ghy-miRn13	c50087.graph_c0	Uncharacterized protein	5	2734	2754	UGCUGCAAGUGGAGGAGCAUU	Cleavage
ghy-miRn13	c48203.graph_c0	Uncharacterized protein	5	897	917	UCUCAGCAUCAUCAAGAUAUC	Cleavage
ghy-miRn13	c45586.graph_c2	Uncharacterized protein	5	1764	1784	GGUUUCAUGAAAGGGAACACG	Translation
ghy-miRn13	c50145.graph_c0	Uncharacterized protein	5	657	677	CGUUUUGUACAUGGGAACACA	Translation
ghy-miRn13	c40253.graph_c0	unnamed protein product	5	908	928	CGUUUAAUAUGGAGGAACGGU	Cleavage
ghy-miRn13	c49185.graph_c0	unnamed protein product	5	4346	4366	AGCUUCGUGCAGAGGAUUACG	Cleavage
ghy-miRn13	c50172.graph_c0	unnamed protein product	5	3210	3230	GGUUUUAUGCAGAGGAAGGCA	Cleavage
ghy-miRn13	c49541.graph_c0	WD40 repeat-containing protein	5	1774	1795	CGACAUUUUUUUAAUCUCUGGA	Cleavage
ghy-miRn14	c25457.graph_c1	protein DETOXIFICATION 24-like	2.5	24	47	GUCCCAUUAACAGCACGGAUGAUU	Translation
ghy-miRn14	c41394.graph_c0	unnamed protein product	2.5	5	28	GUGCUGUUAACAGAACGGAUGAUA	Translation
ghy-miRn14	c46013.graph_c0	RNA-directed DNA polymerase	3	5458	5481	CUUAUUGGGUUAUGACAAGUGUUU	Cleavage
ghy-miRn14	c45655.graph_c0	Uncharacterized protein	3	728	751	GUGCCGUUAACAUCACGGAUGAUU	Translation
ghy-miRn14	c11522.graph_c0	chaperone protein dnaJ A6	3.5	144	167	CAACUGUUAAUGGGACGGUUGAUC	Cleavage
ghy-miRn14	c51447.graph_c0	cytochrome b-c1 complex subunit 7	3.5	123	146	UCUUCGUUGAUACGAUGGAUGGUU	Cleavage
ghy-miRn14	c49186.graph_c1	hypothetical protein	3.5	322	345	AUGUUGUUGAUGGUACGGAUGGUU	Translation
ghy-miRn14	c44237.graph_c0	lysine-specific demethylase JMJ16	3.5	174	197	GUGCUGUUAAUAGCACGAAUGAUU	Translation
ghy-miRn14	c45488.graph_c1	transmembrane protein 87B-like	3.5	279	302	UGACCUUUAAGAGGACGGAUGAAU	Cleavage
ghy-miRn14	c40292.graph_c0	UDP-glucuronate:xylan alpha-glucuronosyltransferase 1	3.5	556	579	CUCGAGUUGGCGGGAUGGAAGAUU	Cleavage
ghy-miRn14	c42938.graph_c0	Uncharacterized protein	3.5	1889	1912	UUUCAUACCUAAAUCUGUAUUUUU	Cleavage
ghy-miRn14	c49044.graph_c1	hypothetical protein	4	3324	3347	UAUAAAAUAACAGGAUGGAAGAUU	Cleavage
ghy-miRn14	c46288.graph_c2	LST8 homolog	4	1332	1355	CAGUUGCUAAAAUGACGGAUGGUU	Cleavage
ghy-miRn14	c49386.graph_c1	MYB44-like transcription factor	4	1485	1508	UACCGUUAACAUCACGAAAAUUAG	Cleavage
ghy-miRn14	c48017.graph_c0	protein KINESIN LIGHT CHAIN-RELATED 3-like	4	2728	2751	GCACUUAUGAUGCGGUUGGCAGGU	Cleavage
ghy-miRn14	c27525.graph_c0	RNA-directed DNA polymerase	4	59	82	AUAUUAUUGGAAGGACGGAUGAUC	Cleavage
ghy-miRn14	c50216.graph_c0	Uncharacterized protein	4	1237	1260	AGCUGUUAACAGUAUGGAUGUUAG	Cleavage
ghy-miRn14	c50216.graph_c0	Uncharacterized protein	4	1237	1260	AGCUGUUAACAGUAUGGAUGUUAG	Cleavage
ghy-miRn14	c46421.graph_c0	Uncharacterized protein	4	1545	1568	GUAGAUUUGAUAGAAUGGAUGAUU	Translation
ghy-miRn14	c46421.graph_c0	Uncharacterized protein	4	1545	1568	GUAGAUUUGAUAGAAUGGAUGAUU	Translation
ghy-miRn14	c46421.graph_c0	Uncharacterized protein	4	1545	1568	GUAGAUUUGAUAGAAUGGAUGAUU	Translation
ghy-miRn14	c41964.graph_c0	Uncharacterized protein	4	586	609	CUUUUGCUGAUGGGACGGCUGAUU	Cleavage
ghy-miRn14	c39466.graph_c1	unnamed protein product	4	1294	1314	AUUUGAUGAUUUGGCUGUUUA	Translation
ghy-miRn14	c50016.graph_c0	CTP synthase	4.5	2817	2840	UGACCUUGCACUUACAAAUUGCGU	Cleavage
ghy-miRn14	c45692.graph_c0	glucose-6-phosphate 1-dehydrogenase	4.5	1235	1258	ACCUUGUUAAUGCGGCAGAUGAUU	Cleavage
ghy-miRn14	c48316.graph_c1	nardilysin-like	4.5	2433	2456	AUUUUAUUAAUGGGAUGGACGGUU	Cleavage
ghy-miRn14	c49398.graph_c0	PH, RCC1 and FYVE domains-containing protein 1-like	4.5	526	549	CAGAUGUUAGUAGGACCGGUGGUC	Cleavage
ghy-miRn14	c30973.graph_c0	phospholipase A I	4.5	548	571	AGGCUUUUAUUAGGGCGGGUGAUG	Cleavage
ghy-miRn14	c47428.graph_c0	protein LEO1 homolog	4.5	578	602	GGUUUCUUAGCAGGAACGGAUGAUU	Cleavage
ghy-miRn14	c49386.graph_c0	RNA-binding KH domain-containing protein RCF3	4.5	3996	4019	CCAAACCGUAUUGUACCAUUUCAU	Translation
ghy-miRn14	c42330.graph_c0	Uncharacterized protein	4.5	545	568	GUUUUGUUUGUGGGGUGGAUGAUA	Cleavage
ghy-miRn14	c41439.graph_c0	Uncharacterized protein	4.5	410	433	CUAAUCUUAAUAGAACGGACGAUU	Translation
ghy-miRn14	c41532.graph_c0	WRKY transcription factor 40	4.5	786	809	AAGAUGUUGACGUGAUUGAUGAUU	Cleavage
ghy-miRn14	c48197.graph_c0	E7 ubiquitin-protein ligase	5	4058	4081	ACACGUUUGAUUCAGUUAGGGUUG	Cleavage
ghy-miRn14	c41183.graph_c0	E7 ubiquitin-protein ligase	5	1053	1076	ACACCGUUGACAGGAUUGAUGAGG	Cleavage
ghy-miRn14	c45714.graph_c0	hypothetical protein	5	1099	1122	AGGCUGAUGACAUGAUUGAUGAUU	Cleavage
ghy-miRn14	c44639.graph_c0	hypothetical protein	5	775	798	AUACUGAUAAAAGAAAGGAUGAUU	Translation
ghy-miRn14	c38766.graph_c0	hypothetical protein	5	400	423	AUAUUGUGAACAUGGGGGGUGAUU	Cleavage
ghy-miRn14	c19778.graph_c0	inactive receptor-like protein kinase	5	400	423	AUAAUGUUUAUGGGGUGGGUGUUU	Cleavage
ghy-miRn14	c46687.graph_c0	methyltransferase PMT24	5	1286	1309	CUAGUGAUAAUAAGACGGAAGGUU	Cleavage
ghy-miRn14	c44814.graph_c0	mitochondrial arginine transporter BAC2	5	1146	1169	GCUCUGUGGACGGCACGGAUGAGU	Translation
ghy-miRn14	c50135.graph_c0	Retrovirus-related Pol polyprotein from transposon TNT 1-94	5	1092	1115	AUGUUAUUAAUGGUACGGAUUAUU	Translation
ghy-miRn14	c86594.graph_c0	SWI/SNF and RSC complexes subunit ssr2	5	112	135	GUACUGUAGCUGGGAAGGAUGAUU	Cleavage
ghy-miRn14	c30224.graph_c0	TCP8 transcription factor	5	260	283	GUGUUGUUGAUGGUGAGGAUGAUU	Translation
ghy-miRn14	c38873.graph_c0	Uncharacterized protein	5	2093	2116	GUGUUGUUGUUGGGAUGGAUGGAU	Cleavage
ghy-miRn14	c44716.graph_c0	Uncharacterized protein	5	740	763	GUAUUGGUAACAGGAUUGAAGGUU	Cleavage
ghy-miRn14	c43349.graph_c0	uncharacterized protein	5	1152	1175	GUGAUGUUCAUAGGACGUGUGACU	Cleavage
ghy-miRn15	c44453.graph_c0	protein FAM135B-like	0.5	3181	3204	CAAUGUCAUCUUUUUGUUUAUUUU	Cleavage
ghy-miRn15	c45905.graph_c0	laccase-15	1.5	1777	1800	AUUGUGACAGCCAUAACAUCAUUU	Translation
ghy-miRn15	c39920.graph_c0	unnamed protein product	2.5	90	113	UGACCAACAAUCAUGACAUCAUUU	Cleavage
ghy-miRn15	c25094.graph_c1	phosphatidylinositol 4-kinase gamma 1-like	3	1621	1644	UUCACGACAGCGAUGAUGUUAUUU	Cleavage
ghy-miRn15	c42176.graph_c0	titin	3	648	671	AUGGAGGUGGCUAUGACAUUGUUU	Cleavage
ghy-miRn15	c15807.graph_c0	Uncharacterized protein	3	251	274	GCUGCGACAUCCAUGGCAUCAUGU	Cleavage
ghy-miRn15	c49963.graph_c0	uncharacterized protein	3	1516	1539	CCUUCAUCAGUCAUGACAUCGUUU	Cleavage
ghy-miRn15	c47151.graph_c0	E3 ubiquitin-protein ligase UPL1-like	3.5	7896	7919	AGCUACUUUGUUGAGAUUCUCCAU	Cleavage
ghy-miRn15	c36530.graph_c0	mediator of RNA polymerase II transcription subunit 33A	3.5	3568	3591	AGCUCUACAGCCAUGACGGUAUUU	Cleavage
ghy-miRn15	c50072.graph_c0	Pentatricopeptide repeat-containing protein	3.5	861	884	UUCUUAGCAGUCAUGACAGCAUUU	Cleavage
ghy-miRn15	c44771.graph_c0	protein HUA2-LIKE 2-like	3.5	4499	4523	AUUGAUCAAAGCCAUGAGAUCAUUU	Cleavage
ghy-miRn15	c22191.graph_c0	protein phosphatase methylesterase 1	3.5	734	757	GAGGGGACAGCUAUGGCUUCAUUG	Cleavage
ghy-miRn15	c48619.graph_c0	transcription-associated protein 1-like	3.5	2218	2241	GGCCUUAUCGAGUUUCACAUCUUU	Cleavage
ghy-miRn15	c50329.graph_c0	Uncharacterized protein	3.5	1	23	UUCUUGCAACUGUGACAUCAUUU	Cleavage
ghy-miRn15	c49790.graph_c1	DNA mismatch repair protein MLH3	4	2851	2874	GUCUUUGUGGGUUCAAAGCUUAAA	Cleavage
ghy-miRn15	c46486.graph_c0	inactive cadmium/zinc-transporting ATPase HMA3	4	2579	2602	CUCGUGUUGACCAUGACAUCAUUG	Cleavage
ghy-miRn15	c46288.graph_c2	LST8 homolog	4	1332	1355	CAGUUGCUAAAAUGACGGAUGGUU	Cleavage
ghy-miRn15	c44720.graph_c0	Pentatricopeptide repeat-containing protein	4	1452	1475	AUUGCGACAUCCAUAAUAUCAUUG	Translation
ghy-miRn15	c39005.graph_c0	RNA-directed DNA methylation 4	4	1581	1604	CACAAACAACGUGGGACCCACAUC	Cleavage
ghy-miRn15	c49514.graph_c0	RNA-directed DNA polymerase	4	1227	1250	UUUAUGGGACCCAUGACAUCAUGU	Cleavage
ghy-miRn15	c46813.graph_c0	type II inositol polyphosphate 5-phosphatase 1	4	1321	1341	GUGUCCACAAAACCCCUUGUU	Cleavage
ghy-miRn15	c41865.graph_c0	unnamed protein product	4	705	728	AAAUUGACAGCCGGGAUAACAUUU	Translation
ghy-miRn15	c47053.graph_c0	60S acidic ribosomal protein P0	4.5	1452	1475	AUUUUUACCAUUAUGACAUUAUUU	Cleavage
ghy-miRn15	c48878.graph_c1	callose synthase 5-like	4.5	735	755	GCUUGAUAGUCGAGCUGUUGA	Cleavage
ghy-miRn15	c12363.graph_c0	concanavalin A-like lectin/glucanase domain, Xyloglucan endotransglucosylase/hydrolase	4.5	892	915	AUUGCGUUAACUAUGACCUCAUUU	Cleavage
ghy-miRn15	c25555.graph_c0	dual specificity protein phosphatase PHS1	4.5	189	212	UCAGUGACCGCCAUCAUAUGAUUU	Translation
ghy-miRn15	c41847.graph_c0	F-box/kelch-repeat protein	4.5	821	844	AUUAUCGUAUCAAUGACAUCAUUU	Cleavage
ghy-miRn15	c45434.graph_c0	hypothetical protein	4.5	704	724	AAUGUUAUGUGGAGGAAUAUA	Cleavage
ghy-miRn15	c38063.graph_c0	hypothetical protein	4.5	1157	1180	AGUGUGACAGGCAUGAUGACAUUG	Cleavage
ghy-miRn15	c49400.graph_c0	hypothetical protein	4.5	911	934	CGCGUGAUGACCAUCACAUCAUUC	Translation
ghy-miRn15	c48388.graph_c0	hypothetical protein	4.5	1982	2005	AUGGUCAUAAUAAUGACAUCAUUU	Cleavage
ghy-miRn15	c46940.graph_c0	putative UPF0481 protein	4.5	216	239	UUGGUGGCAGCUAUGGUAUCAGUG	Cleavage
ghy-miRn15	c48610.graph_c0	retrovirus-related Pol polyprotein from transposon TNT 1-94	4.5	1770	1793	GUAGUGACCGCCAUGGCAUGAUAU	Cleavage
ghy-miRn15	c51160.graph_c0	rhomboid-like protein 20	4.5	251	274	UUAGUGGCAGCAUUGAUGUCAUUU	Cleavage
ghy-miRn15	c44227.graph_c6	salutaridine reductase	4.5	969	992	AUGAAAACAGUUAUGACUUUGUUU	Cleavage
ghy-miRn15	c44227.graph_c6	salutaridine reductase	4.5	969	992	AUGAAAACAGUUAUGACUUUGUUU	Cleavage
ghy-miRn15	c41946.graph_c0	unnamed protein product	4.5	164	187	AUUUUGCUAGUUAUAAUAUCAUUU	Translation
ghy-miRn15	c49529.graph_c0	Armadillo-like helical	5	1050	1073	AUUUUGUCAACAAUCACAUCAUUU	Translation
ghy-miRn15	c44793.graph_c0	E3 ubiquitin-protein ligase RHF2A-like	5	2244	2268	UUUGUGGCAAGCUAUCACAUUAUUU	Translation
ghy-miRn15	c31606.graph_c0	endosulphine	5	765	788	UAUGUGACAUCUAUUAUAUGAUUU	Translation
ghy-miRn15	c36242.graph_c0	hypothetical protein	5	656	679	AUGGUGGUGGUCGUGAUAGCGUUU	Cleavage
ghy-miRn15	c25646.graph_c0	LOW PSII ACCUMULATION 1	5	741	764	AUUGUGGUUUUCGUGGCAUUAUUU	Cleavage
ghy-miRn15	c45763.graph_c0	lysosomal Pro-X carboxypeptidase-like	5	1289	1312	AAUUUGGUGGCCAUGAUAUUAUGA	Cleavage
ghy-miRn15	c45783.graph_c0	methionine--tRNA ligase/mitochondrial	5	826	850	AUUUUGUACAGCCGUCAUAUCGUUU	Translation
ghy-miRn15	c49219.graph_c0	MICRORCHIDIA 7-like	5	1518	1540	CUUGUGACA-UCAUCAUAUCGUUU	Translation
ghy-miRn15	c33974.graph_c0	NF-Y protein	5	119	142	GUUAUGUUAGUCUUGGCAUUGUUU	Cleavage
ghy-miRn15	c49495.graph_c0	Pentatricopeptide repeat-containing protein	5	1776	1799	AUUCUAAGAGCCGUGACAUCUUUG	Cleavage
ghy-miRn15	c82475.graph_c0	Retrovirus-related Pol polyprotein from transposon RE1	5	150	173	AUUGACAUAUCCAUGAGAUUGUUU	Cleavage
ghy-miRn15	c50135.graph_c0	Retrovirus-related Pol polyprotein from transposon TNT 1-94	5	1092	1115	AUGUUAUUAAUGGUACGGAUUAUU	Translation
ghy-miRn15	c50490.graph_c2	RNA-directed DNA polymerase	5	803	826	CUUGUGAGACCCACGACAUCAUGU	Translation
ghy-miRn15	c43598.graph_c0	transcription factor DIVARICATA-like	5	410	430	UUGUAGGGUCAUUAAGAUUGA	Cleavage
ghy-miRn15	c25533.graph_c0	Uncharacterized protein	5	559	581	GUUGUGA-AGUGAUGACGUCGUUU	Cleavage
ghy-miRn15	c49930.graph_c0	Uncharacterized protein	5	2657	2680	GCUGUGACAUCUCUGAUAUCGUUC	Cleavage
ghy-miRn15	c29657.graph_c0	Uncharacterized protein	5	480	503	AUUGCCAUAGGCAUGAUAUGGUUU	Cleavage
ghy-miRn15	c50270.graph_c0	unnamed protein product	5	1521	1541	UGUUUUCACCUGAGAAUGUCU	Cleavage
ghy-miRn15	c50397.graph_c1	uridine-cytidine kinase C	5	369	392	AUUGUGAUCGUUAUGAGAUUGUUU	Cleavage
ghy-miRn15	c50462.graph_c0	zinc finger MYM-type protein 1-like	5	2910	2933	GUUGUGAAAGUAGUGUCAUCAUUU	Cleavage
ghy-miRn15	c47114.graph_c0	zinc transporter protein	5	2919	2942	AUUGAUGCUGUGAUGACAUUAUUU	Cleavage
ghy-miRn16	c45736.graph_c0	U3 small nucleolar RNA-associated protein 14	2.5	2988	3011	AGCAGUGAUGACAGCAUGGAGGAU	Cleavage
ghy-miRn16	c41394.graph_c0	unnamed protein product	2.5	5	28	GUGCUGUUAACAGAACGGAUGAUA	Translation
ghy-miRn16	c36201.graph_c0	1-aminocyclopropane-1-carboxylate oxidase homolog 3-like	3	523	546	CCGUUUGUGGACAGUACGGAUAAU	Cleavage
ghy-miRn16	c46643.graph_c0	ABC transporter F family member 1-like	3	44	67	CUUAAUGUUGACAACACGAAAAAU	Translation
ghy-miRn16	c20132.graph_c0	CTL-like protein DDB_G0274487	3	1382	1405	GCUGCUGUUGAUAGUGCGGCAAAU	Cleavage
ghy-miRn16	c42391.graph_c0	DEAD-box ATP-dependent RNA helicase 29	3	462	485	GUUGGUGGUGAUAGUAUGGAAAGU	Cleavage
ghy-miRn16	c17240.graph_c1	hypothetical protein	3	1468	1489	AUGCGUGUUUUUGAGUUUUAGG	Cleavage
ghy-miRn16	c17240.graph_c1	hypothetical protein	3	1468	1489	AUGCGUGUUUUUGAGUUUUAGG	Cleavage
ghy-miRn16	c42222.graph_c0	white-brown complex homolog protein 30	3	666	689	AUUGAUGAUAAUAGCGCGGAAAAU	Cleavage
ghy-miRn16	c85256.graph_c0	Acetolactate synthase small subunitl	3.5	69	92	UGUUUUUUUGAUGGUGCGGAAGAU	Cleavage
ghy-miRn16	c48949.graph_c1	hypothetical protein	3.5	2439	2462	AUGCGUGUUGAUAGCAUUGAAAAA	Cleavage
ghy-miRn16	c49186.graph_c1	hypothetical protein	3.5	322	345	AUGUUGUUGAUGGUACGGAUGGUU	Translation
ghy-miRn16	c26780.graph_c0	strictosidine beta-D-glucosidase	3.5	76	99	CCCGUUAUUUACAUCACGGAAAAU	Translation
ghy-miRn16	c44766.graph_c0	tetratricopeptide-like helical domain-containing protein	3.5	113	136	CCGUCUGUUGACAGCACGAAAGCU	Cleavage
ghy-miRn16	c45600.graph_c0	Uncharacterized protein	3.5	298	321	UUCUAUGACAAAGUCAAUGUCGAU	Cleavage
ghy-miRn16	c43620.graph_c0	acetyl-CoA acyltransferase	4	439	462	GUUGUUGCUGGCGGCAUGGAAAGC	Cleavage
ghy-miRn16	c32267.graph_c0	Agenet-like domain-containing protein	4	922	945	AAUGAUGUUUAUAGCGCUGAGAAU	Cleavage
ghy-miRn16	c7294.graph_c0	anther-specific chalcone synthase-like protein 1	4	138	161	AUAGUUGUUGGUGUCACGGAAAAA	Translation
ghy-miRn16	c17953.graph_c0	basic leucine zipper 25-like	4	620	643	UAGGUUGAUGAUAGUAAGGAAAGU	Cleavage
ghy-miRn16	c45646.graph_c0	delta(7)-sterol-C5(6)-desaturase-like	4	1630	1653	UUGGUUGUUGACAACAUGGAAGCU	Translation
ghy-miRn16	c40247.graph_c0	G-type lectin S-receptor-like serine/threonine-protein kinase	4	1872	1895	ACGUUUGAUGACAUCAUGGAAAAG	Translation
ghy-miRn16	c30359.graph_c0	hypothetical protein	4	253	276	ACUAUUCUUGAUGGCACGAAAGAU	Cleavage
ghy-miRn16	c49386.graph_c1	MYB44-like transcription factor	4	1485	1508	UACCGUUAACAUCACGAAAAUUAG	Cleavage
ghy-miRn16	c40563.graph_c0	nuclear pore complex protein NUP85	4	1382	1405	AGAGUUGUUGACGGCAGGGAGUAU	Cleavage
ghy-miRn16	c45327.graph_c0	paladin	4	2512	2535	UCGGUUGUUGACAGCCUGGACAGU	Cleavage
ghy-miRn16	c42261.graph_c0	synaptotagmin-5-like	4	1923	1946	CAAGUUGUUGAUAGGAUGGGGAGU	Translation
ghy-miRn16	c42261.graph_c0	synaptotagmin-5-like	4	1923	1946	CAAGUUGUUGAUAGGAUGGGGAGU	Translation
ghy-miRn16	c50216.graph_c0	Uncharacterized protein	4	1237	1260	AGCUGUUAACAGUAUGGAUGUUAG	Cleavage
ghy-miRn16	c45828.graph_c0	Uncharacterized protein	4	326	349	AGUUUUCGUGACAACAUGGAAAAU	Translation
ghy-miRn16	c37744.graph_c0	Uncharacterized protein	4	953	976	UGUUUUGUUGGAAGUGCGGAGAGU	Cleavage
ghy-miRn16	c12594.graph_c0	Uncharacterized protein	4	1826	1849	AAUUGUUGUCAGUAUGGAAAUCAU	Cleavage
ghy-miRn16	c46374.graph_c0	unnamed protein product	4	1571	1594	UGCUGUUAAUAGCACGGAAGCUUU	Cleavage
ghy-miRn16	c34852.graph_c0	7-dehydrocholesterol reductase	4.5	1969	1992	UGUCGUUCAAAGUACGGGAAAUAU	Cleavage
ghy-miRn16	c45931.graph_c0	CDPK-related kinase 5-like	4.5	501	521	UGCUUCAAGUUGAUGAACACA	Translation
ghy-miRn16	c48954.graph_c0	cleavage and polyadenylation specificity factor subunit 1	4.5	4278	4301	GUUUUUGUUGACAGCAUGGCAACA	Cleavage
ghy-miRn16	c43552.graph_c0	dihydroxy-acid dehydratase	4.5	1658	1680	UGCUUUGUUGACGG-AUGGAAGAU	Translation
ghy-miRn16	c55920.graph_c0	fasciclin-like arabinogalactan protein 17	4.5	472	495	UGUGCUUUUGUCAGCGUGGAAAGG	Cleavage
ghy-miRn16	c25480.graph_c0	glutamyl-tRNA reductase 1	4.5	1239	1262	GUCGUUGUUAACAGAACAGAAGAU	Translation
ghy-miRn16	c41931.graph_c0	hypothetical protein	4.5	656	676	ACGGGAUGAAGAUUGGUUUGU	Translation
ghy-miRn16	c7594.graph_c0	hypothetical protein	4.5	151	174	AUUGCUGUUGACAUCACGGAGCAA	Translation
ghy-miRn16	c49386.graph_c0	RNA-binding KH domain-containing protein RCF3	4.5	3996	4019	CCAAACCGUAUUGUACCAUUUCAU	Translation
ghy-miRn16	c48032.graph_c0	STICHEL-like	4.5	759	782	GGUAUUGGUGAUGGCGAGGAAAGU	Cleavage
ghy-miRn16	c36246.graph_c0	trafficking protein particle complex II-specific subunit 120 homolog	4.5	4053	4076	GGGGUAGUUGACAGUGGGGAGAGU	Cleavage
ghy-miRn16	c36031.graph_c0	Transposon Ty3-G Gag-Pol polyprotein	4.5	857	880	AUAGUUGGUGGCAGUGUGGAAAUU	Cleavage
ghy-miRn16	c10420.graph_c0	Uncharacterized protein	4.5	376	399	AUUGUUGAGGACGGUGUGGAAGAU	Cleavage
ghy-miRn16	c24767.graph_c0	Uncharacterized protein	4.5	69	92	UGCUGUUGACAGCAUGGAAGCUUU	Cleavage
ghy-miRn16	c66210.graph_c0	uncharacterized protein	4.5	139	162	AACUUUGUUGAGAACACGGAAAGA	Translation
ghy-miRn16	c21034.graph_c0	unnamed protein product	4.5	1542	1565	GGUUUUGUUGACGGUUUGGAAAGC	Cleavage
ghy-miRn16	c87273.graph_c0	unnamed protein product	4.5	150	173	GGAGUUGUCGAAAGAAUGGAAAAU	Translation
ghy-miRn16	c50229.graph_c0	ATP synthase CF1 alpha subunit	5	4864	4887	UUUGUUGUUUUUAGCACGAAAAAC	Cleavage
ghy-miRn16	c44473.graph_c0	ATP-citrate synthase beta chain protein 2-like	5	2358	2381	AGAGUUGUUGGCGGUACGUAGGAA	Cleavage
ghy-miRn16	c41724.graph_c0	cell division cycle-associated protein 7-like	5	951	971	UUCGAAUGAGGCCGAGUCUGA	Cleavage
ghy-miRn16	c38321.graph_c0	dsRNA-binding protein 2	5	470	493	GGUGGCGUUGGUGGUGCGGAGAAA	Cleavage
ghy-miRn16	c71703.graph_c0	hypothetical protein	5	288	311	AGAGUUGUUGUCGGCAGGGGAGAA	Cleavage
ghy-miRn16	c56054.graph_c0	hypothetical protein	5	545	568	GCUGUUGUUGACAGAGCGUAGAAA	Translation
ghy-miRn16	c36512.graph_c0	major facilitator superfamily protein	5	909	932	UGUGAUGUGAGCAGCAUGGAGGAG	Cleavage
ghy-miRn16	c20171.graph_c0	NAD-dependent malic enzyme 62 kDa isoforml	5	1001	1024	AUUGUUGUUGCCGGUGCCGGAAGU	Cleavage
ghy-miRn16	c40137.graph_c0	pentatricopeptide repeat-containing protein	5	1236	1259	UGUGUUGGUUACAGCAGGGAAGAG	Cleavage
ghy-miRn16	c10726.graph_c0	Pentatricopeptide repeat-containing protein	5	262	286	GCACUUGUUGACAUGUACGCAAAAU	Translation
ghy-miRn16	c33458.graph_c0	reticulon-like protein B1	5	1044	1067	GAUUGUUGACAGUAUGAGAAGUAU	Cleavage
ghy-miRn16	c49301.graph_c0	tripeptidyl-peptidase 2	5	513	536	GAUGUUGUUGAUUGCACUGGGAGU	Cleavage
ghy-miRn16	c50442.graph_c0	trithorax group protein osa-like	5	3152	3175	ACCGCAGUAGCUUUGAACCACAAU	Cleavage
ghy-miRn16	c20115.graph_c0	Uncharacterized protein	5	652	675	CGUAUUGGUGGCAGCACUGAGGAC	Cleavage
ghy-miRn16	c29224.graph_c0	zinc finger, CCHC-type	5	1147	1172	AAAUUUUGGAAUUAGUUCAUAGUGAU	Cleavage
ghy-miRn17	c49395.graph_c0	inactive protein kinase SELMODRAFT_444075-like	3.5	3527	3550	UAUUAUAUUAUACUUACAGAUACU	Cleavage
ghy-miRn17	c50255.graph_c0	LEAF RUST 10 DISEASE-RESISTANCE LOCUS RECEPTOR-LIKE PROTEIN KINASE-like 2.1	3.5	347	367	UUUGUGGGUACCCUGGUUUUG	Cleavage
ghy-miRn17	c45600.graph_c0	Uncharacterized protein	3.5	298	321	UUCUAUGACAAAGUCAAUGUCGAU	Cleavage
ghy-miRn17	c40172.graph_c0	calcineurin-like metallo-phosphoesterase superfamily protein	4	1793	1813	UAGAAAGGUGUCCUAGUCCUA	Cleavage
ghy-miRn17	c44257.graph_c0	hypothetical protein	4	1767	1787	GUGGGGGGUACCUUGUUUUUG	Cleavage
ghy-miRn17	c49366.graph_c0	methyltransferase PMT14	4	1131	1154	UUAAUGGAGGUUGAUCGAGUUCUU	Cleavage
ghy-miRn17	c51247.graph_c0	monodehydroascorbate reductase-like	4	449	469	GGGGAGGAUACAUUGGUCUUG	Translation
ghy-miRn17	c31316.graph_c0	protein CELLULOSE SYNTHASE INTERACTIVE 1-like	4	2423	2443	CGGGGAGGUACCUUGGGCCUG	Cleavage
ghy-miRn17	c2728.graph_c0	putative protein IDA	4	348	368	AUGAAGGGUAUUUUAGUCUUU	Cleavage
ghy-miRn17	c49669.graph_c1	UBP1-associated protein 2A-like	4	1319	1339	AAGGUGGGUAUCCUAAUCCUC	Cleavage
ghy-miRn17	c30860.graph_c0	anaphase-promoting complex subunit 13	4.5	258	278	GAGGGGGGAACCCUAAUCCUU	Cleavage
ghy-miRn17	c25483.graph_c0	ARF guanine-nucleotide exchange factor GNOM-like	4.5	4202	4222	AUGGAAGGUACGCUCGUUCUG	Translation
ghy-miRn17	c42082.graph_c0	Armadillo-type fold	4.5	491	511	AUGGACGGAACCCUAGUAUUG	Cleavage
ghy-miRn17	c19043.graph_c0	CBS domain-containing protein CBSX1	4.5	94	114	AGGGAAGCUACCCUAGACCUU	Cleavage
ghy-miRn17	c39446.graph_c0	copper-transporting ATPase RAN1-like	4.5	2803	2823	CAGUGGGGUACUCUGUUCUUG	Cleavage
ghy-miRn17	c12100.graph_c0	DNA replication licensing factor MCM2	4.5	1884	1903	AAGGAGG-UGCCCUUGUUCUG	Cleavage
ghy-miRn17	c33957.graph_c1	E3 ubiquitin-protein ligase DIS1-like	4.5	1016	1036	GUGGAGAGUACAUUAGUCUUU	Translation
ghy-miRn17	c34841.graph_c0	exportin-7-A	4.5	2186	2207	GCGGUUUACAUAGUCAGAGAUA	Translation
ghy-miRn17	c24994.graph_c0	far upstream element-binding protein 1	4.5	2833	2853	CUGGAGGGUACCCUGGUCAAC	Cleavage
ghy-miRn17	c40862.graph_c0	F-box domain, leucine-rich repeat domain superfamily, F-box-like domain superfamily	4.5	247	267	AUGGAGGGUAUCCUUAUCCUU	Cleavage
ghy-miRn17	c49631.graph_c0	hypothetical protein	4.5	779	799	GGGAGGGGUGUCCUAGUCUAG	Cleavage
ghy-miRn17	c46792.graph_c0	Leucine carboxyl methyltransferase	4.5	2011	2031	UCAGAGGGUAUUUUGGUCUUU	Cleavage
ghy-miRn17	c23461.graph_c0	lysM domain receptor-like kinase 3	4.5	352	372	UUGAAGGGUAUUUUAUUCUUG	Cleavage
ghy-miRn17	c26011.graph_c0	methyltransferase PMT14	4.5	668	688	CAAAGGGGUAUUCUAGUCCUU	Cleavage
ghy-miRn17	c38865.graph_c0	SCARECROW	4.5	1760	1783	GGAGCCUAUACUCAAGGAGGGUGG	Translation
ghy-miRn17	c34191.graph_c0	SGT1 homolog B-like	4.5	535	555	AGGAAGGGUACACUGGUCUUU	Translation
ghy-miRn17	c48390.graph_c1	sister-chromatid cohesion protein 3	4.5	1476	1496	CAGGACGGUAUCCUAGACUUU	Cleavage
ghy-miRn17	c33632.graph_c1	UDP-galactose/UDP-glucose transporter 2	4.5	831	851	GAGGAGGGUAUUUUCGUCUUA	Cleavage
ghy-miRn17	c35252.graph_c0	uncharacterized protein	4.5	761	781	AAGGAGGGUACUUUAGCUUUU	Cleavage
ghy-miRn17	c49729.graph_c0	unnamed protein product	4.5	212	232	GCGGAGGGUAUUUUGGUCCGA	Cleavage
ghy-miRn17	c77731.graph_c0	unnamed protein product	4.5	1	21	GCCACGAGUAUCCUAGUCCUG	Cleavage
ghy-miRn17	c58984.graph_c0	Apple-like protein	5	193	213	CAGGAGGAUGUUCUAGACCUA	Cleavage
ghy-miRn17	c46347.graph_c0	BTB/POZ domain-containing protein	5	1980	2000	GGAGGGGGUACUCUAUUUCUU	Cleavage
ghy-miRn17	c47498.graph_c0	class I glutamine amidotransferase-like superfamily protein	5	191	211	ACUGAGGGUGCCCUGGCCAUG	Cleavage
ghy-miRn17	c43405.graph_c0	crooked neck-like protein 1	5	8	28	AAGGGGGUUACCCUGGUGUUU	Cleavage
ghy-miRn17	c48503.graph_c0	Development/cell death domain-containing protein	5	2701	2721	UUUAAGGGUAUUUUAGUCUUU	Cleavage
ghy-miRn17	c50407.graph_c0	dual specificity protein kinase zak2-like	5	1240	1260	AGUGAAGGUGCCCGAGUCCUC	Cleavage
ghy-miRn17	c22512.graph_c0	GPI-anchored protein LLG1-like	5	434	454	UAGCAGGGUAGUUUGGUCCUU	Translation
ghy-miRn17	c46405.graph_c1	hypothetical protein	5	684	704	AAGCUGCGUACCAUAGUCUUG	Cleavage
ghy-miRn17	c17397.graph_c0	hypothetical protein	5	151	171	GCUAUGGUUGCCCUAGUCUUG	Cleavage
ghy-miRn17	c29936.graph_c0	hypothetical protein	5	2025	2045	UACAAGGGUAUUUUAGUCUUU	Cleavage
ghy-miRn17	c46144.graph_c1	hypothetical protein	5	2638	2658	AAGGAGGAUGUCAUAGUCAUG	Cleavage
ghy-miRn17	c40680.graph_c0	hypothetical protein	5	86	106	GAUUAGGGCAUCCUAGUUUUG	Cleavage
ghy-miRn17	c48819.graph_c0	laccase-6	5	2873	2893	GGGUAGGGAACCCCAGUUUUG	Cleavage
ghy-miRn17	c49426.graph_c0	lysine-ketoglutarate reductase/saccharopine dehydrogenase bifunctional enzyme	5	4189	4212	AAGACUAGAACUGGAACCGGAACA	Cleavage
ghy-miRn17	c23346.graph_c0	NDR1/HIN1-like protein 6	5	310	330	GGGGAGUGUACCCGGGUUUUA	Cleavage
ghy-miRn17	c47094.graph_c1	nicastrin	5	3753	3774	UACACGUGCCGCAGCUUCUCUA	Translation
ghy-miRn17	c41757.graph_c0	nudix hydrolase 23	5	1218	1238	CAGGAAGGUGUUCUGAUUCUG	Cleavage
ghy-miRn17	c12141.graph_c0	phospholipase D alpha 1-like	5	151	171	CAGAAGGGUAGUUUAGUCUUU	Translation
ghy-miRn17	c47872.graph_c0	pleiotropic drug resistance protein 3-like	5	1182	1202	UACAAGGGUAUGCUAGUCCUU	Translation
ghy-miRn17	c50094.graph_c0	RNA-directed DNA polymerase	5	2656	2676	GAGAGGGAUGCCCUAGUCUAG	Cleavage
ghy-miRn17	c44813.graph_c0	serine/threonine-protein kinase	5	1038	1058	GGGGAGGAUCUCUUGGUUUUG	Cleavage
ghy-miRn17	c30037.graph_c0	ubiquitin thioesterase otubain-like	5	2210	2230	AAGGAGGUUGCCUUGAUCCUA	Cleavage
ghy-miRn17	c12538.graph_c0	ubiquitin-conjugating enzyme E2 22	5	498	521	UAUUUUUUGACUAAGAUUUUCCAU	Cleavage
ghy-miRn17	c45326.graph_c0	U-box domain-containing protein 30-like	5	1332	1352	GCAGAGGGUAACCGGGUCUUG	Translation
ghy-miRn17	c39859.graph_c0	Uncharacterized protein	5	362	382	AUCGAGGGUUCCCAAGUCCUC	Cleavage
ghy-miRn17	c41378.graph_c1	Uncharacterized protein	5	258	278	GAACUUGAAGAGCAGAUCAUG	Cleavage
ghy-miRn17	c32309.graph_c0	unnamed protein product	5	1154	1174	UCAUGGGGUACCCUACUCCUU	Cleavage
ghy-miRn17	c49036.graph_c0	zinc finger CCCH domain-containing protein 41-like	5	767	787	GAGGAAGGGACUCUGGUCUUU	Cleavage
ghy-miRn18	c25457.graph_c1	protein DETOXIFICATION 24-like	2.5	24	47	GUCCCAUUAACAGCACGGAUGAUU	Translation
ghy-miRn18	c45736.graph_c0	U3 small nucleolar RNA-associated protein 14	2.5	2988	3011	AGCAGUGAUGACAGCAUGGAGGAU	Cleavage
ghy-miRn18	c43329.graph_c1	Uncharacterized protein	2.5	1	20	ACCAAAUCAUGACACCUCAU	Cleavage
ghy-miRn18	c49800.graph_c2	1-phosphatidylinositol-3-phosphate 5-kinase FAB1B-like	3	5050	5073	AGGUUCUGAAAGCACGGAAGAUUC	Cleavage
ghy-miRn18	c41477.graph_c0	protein ANTHESIS POMOTING FACTOR 1	3	516	539	UACGCUUGAAAAUACGGAAGAUUU	Cleavage
ghy-miRn18	c45351.graph_c0	protein IQ-DOMAIN 14-like	3	371	394	AGAAGUUGGCUGCACGGCAGAUUU	Cleavage
ghy-miRn18	c45655.graph_c0	Uncharacterized protein	3	728	751	GUGCCGUUAACAUCACGGAUGAUU	Translation
ghy-miRn18	c48177.graph_c0	Uncharacterized protein	3	1815	1838	AGAAAUUGACGGUGCUGAAGAUUU	Cleavage
ghy-miRn18	c85256.graph_c0	Acetolactate synthase small subunitl	3.5	69	92	UGUUUUUUUGAUGGUGCGGAAGAU	Cleavage
ghy-miRn18	c28989.graph_c0	Armadillo	3.5	81	104	CCUUUUUGACGGCCCGGAAGACUU	Translation
ghy-miRn18	c47837.graph_c1	F-box/FBD/LRR-repeat protein	3.5	999	1022	AAAAGUUUACAGCAUUGGAGAUUU	Cleavage
ghy-miRn18	c46960.graph_c0	heat shock protein 90-5	3.5	1959	1982	CGUAGAUGUCAGCAAGGAAGAUUU	Translation
ghy-miRn18	c25651.graph_c0	hypothetical protein	3.5	897	920	CCCUUUUGGCAGCAUCGAGGGUUU	Cleavage
ghy-miRn18	c49186.graph_c1	hypothetical protein	3.5	322	345	AUGUUGUUGAUGGUACGGAUGGUU	Translation
ghy-miRn18	c44237.graph_c0	lysine-specific demethylase JMJ16	3.5	174	197	GUGCUGUUAAUAGCACGAAUGAUU	Translation
ghy-miRn18	c44766.graph_c0	tetratricopeptide-like helical domain-containing protein	3.5	113	136	CCGUCUGUUGACAGCACGAAAGCU	Cleavage
ghy-miRn18	c40292.graph_c0	UDP-glucuronate:xylan alpha-glucuronosyltransferase 1	3.5	556	579	CUCGAGUUGGCGGGAUGGAAGAUU	Cleavage
ghy-miRn18	c48758.graph_c0	UDP-sugar pyrophosphorylase-like	3.5	1710	1730	UUGCAGCCUCGUCAGGAUUGU	Cleavage
ghy-miRn18	c45600.graph_c0	Uncharacterized protein	3.5	298	321	UUCUAUGACAAAGUCAAUGUCGAU	Cleavage
ghy-miRn18	c48705.graph_c0	BAG-associated GRAM protein 1	4	3306	3329	UGAAGAUGAUAGUACGGAAUGUUU	Cleavage
ghy-miRn18	c45646.graph_c0	delta(7)-sterol-C5(6)-desaturase-like	4	1630	1653	UUGGUUGUUGACAACAUGGAAGCU	Translation
ghy-miRn18	c30359.graph_c0	hypothetical protein	4	253	276	ACUAUUCUUGAUGGCACGAAAGAU	Cleavage
ghy-miRn18	c49230.graph_c0	hypothetical protein	4	924	947	UGCAGCAGACGGCACGGAAGAUAU	Cleavage
ghy-miRn18	c46039.graph_c0	late embryogenesis abundant protein	4	639	662	UAACUAUGACAGCAUGGAAGUUUC	Cleavage
ghy-miRn18	c49386.graph_c1	MYB44-like transcription factor	4	1485	1508	UACCGUUAACAUCACGAAAAUUAG	Cleavage
ghy-miRn18	c49386.graph_c1	MYB44-like transcription factor	4	1485	1508	UACCGUUAACAUCACGAAAAUUAG	Cleavage
ghy-miRn18	c40563.graph_c0	nuclear pore complex protein NUP85	4	1382	1405	AGAGUUGUUGACGGCAGGGAGUAU	Cleavage
ghy-miRn18	c31296.graph_c0	rapid ALkalinization Factor	4	277	300	CCACGUUGAUUGCACGGAACAUUA	Cleavage
ghy-miRn18	c42261.graph_c0	synaptotagmin-5-like	4	1923	1946	CAAGUUGUUGAUAGGAUGGGGAGU	Translation
ghy-miRn18	c35852.graph_c0	ubiquitin-like-specific protease 2B	4	2067	2090	ACUUUUUGAUGGCAAGGAAGCUUU	Translation
ghy-miRn18	c50216.graph_c0	Uncharacterized protein	4	1237	1260	AGCUGUUAACAGUAUGGAUGUUAG	Cleavage
ghy-miRn18	c49846.graph_c0	cell division control protein 48 homolog C	4.5	2020	2043	GCGAAUUGGCAGUGCGGACGAUAU	Cleavage
ghy-miRn18	c49846.graph_c0	cell division control protein 48 homolog C	4.5	2020	2043	GCGAAUUGGCAGUGCGGACGAUAU	Cleavage
ghy-miRn18	c43552.graph_c0	dihydroxy-acid dehydratase	4.5	1658	1680	UGCUUUGUUGACGG-AUGGAAGAU	Translation
ghy-miRn18	c24495.graph_c0	DNA-directed RNA polymerase I subunit 1	4.5	2482	2500	UGUUUGCAUGAGAUUAUCC	Cleavage
ghy-miRn18	c50885.graph_c0	hypothetical protein	4.5	124	147	GUAUGUUUACAGUGUGGAGGACUU	Cleavage
ghy-miRn18	c41185.graph_c0	K(+) efflux antiporter 6-like	4.5	2170	2193	UCUUGUUCAUCGCACGGAGGAAUU	Cleavage
ghy-miRn18	c37761.graph_c0	pathogen-related protein-like	4.5	262	285	UUCUGUUAAUGGUAGGGAAGGUUU	Translation
ghy-miRn18	c46069.graph_c0	Pentatricopeptide repeat-containing protein	4.5	2116	2139	UGAUGUAGAGGGCGUGGAGGGUUU	Cleavage
ghy-miRn18	c50141.graph_c0	ribonuclease H-like domain-containing protein	4.5	709	732	AUCGGGUCCGAGUUUCGCGGACGU	Cleavage
ghy-miRn18	c49386.graph_c0	RNA-binding KH domain-containing protein RCF3	4.5	3996	4019	CCAAACCGUAUUGUACCAUUUCAU	Translation
ghy-miRn18	c50665.graph_c0	sedoheptulose-1,7-bisphosphatase	4.5	240	263	AAUUGGUGAAAGUCUGGAAGAUUU	Translation
ghy-miRn18	c43465.graph_c0	Uncharacterized protein	4.5	876	899	AGUUGUUUGUAGUACGCAGGAUUU	Cleavage
ghy-miRn18	c24767.graph_c0	Uncharacterized protein	4.5	69	92	UGCUGUUGACAGCAUGGAAGCUUU	Cleavage
ghy-miRn18	c90731.graph_c0	uncharacterized protein	4.5	51	74	CAGUGUGGACAGCUUGGAAGACUU	Translation
ghy-miRn18	c35433.graph_c0	vacuolar iron transporter 1	4.5	772	795	CGAUGAUGACGUCACGGACGAUUU	Cleavage
ghy-miRn18	c44473.graph_c0	ATP-citrate synthase beta chain protein 2-like	5	2358	2381	AGAGUUGUUGGCGGUACGUAGGAA	Cleavage
ghy-miRn18	c41611.graph_c0	calcium-transporting ATPase 3, endoplasmic reticulum-type	5	2377	2400	UGCUUUUGAUCACUUGGAAGAUUU	Translation
ghy-miRn18	c41460.graph_c0	dolichyl-diphosphooligosaccharide--protein glycosyltransferase 48 kDa subunit	5	1384	1409	UGUUUUUGAAACAUCAUGGGAGAUUU	Cleavage
ghy-miRn18	c40750.graph_c0	EPSPS-like protein	5	332	355	AGCCGUCGACGGCGCCGGAGAUUG	Cleavage
ghy-miRn18	c26715.graph_c0	hypothetical protein	5	860	883	AGUUGUUAAUAGCAUGAAAGACUU	Cleavage
ghy-miRn18	c12163.graph_c0	hypothetical protein	5	561	585	GACUGCUUGAAGGUAUGGAAGGUUU	Cleavage
ghy-miRn18	c60800.graph_c0	L-type lectin-domain containing receptor kinase S.5	5	174	197	ACUUGUUGAAGGUGUGGAAGGAUU	Cleavage
ghy-miRn18	c22618.graph_c0	plasma membrane ATPase 1	5	29	52	GCUUGGUGACAGUACGGACGGGUU	Cleavage
ghy-miRn18	c30224.graph_c0	TCP8 transcription factor	5	260	283	GUGUUGUUGAUGGUGAGGAUGAUU	Translation
ghy-miRn18	c89533.graph_c0	translation initiation factor RLI1	5	180	203	UGCUGUUGAUGGCGGAGAGGAUUU	Translation
ghy-miRn18	c38545.graph_c1	unnamed protein product	5	816	839	GACUGUAGACCGCGCUGAAGAUUA	Cleavage
ghy-miRn18	c40023.graph_c0	unnamed protein product	5	928	951	AGAUGUUGGUGUGACGGAGGAUUU	Cleavage
ghy-miRn18	c29224.graph_c0	zinc finger, CCHC-type	5	1147	1172	AAAUUUUGGAAUUAGUUCAUAGUGAU	Cleavage
ghy-miRn19	c42142.graph_c0	cytokinin dehydrogenase 7	3	1707	1730	AAGUCCUUUCCGGCGUAGCCGGUG	Cleavage
ghy-miRn19	c79069.graph_c0	Dynamin	3.5	46	69	CAAUACUCUCCAGCACAGAUGAUU	Cleavage
ghy-miRn19	c52102.graph_c0	heat shock protein 81-1	3.5	45	68	UACGGGACUCCAGCAUGGCUGGUU	Cleavage
ghy-miRn19	c31404.graph_c0	hypothetical protein	3.5	1166	1189	GUGACAUCUCCGGCACAGUCGAUU	Cleavage
ghy-miRn19	c19806.graph_c0	inactive purple acid phosphatase 27	3.5	943	966	UGUUUCACUUCUGCAUAGCUGAUU	Cleavage
ghy-miRn19	c31703.graph_c0	Uncharacterized protein	3.5	200	223	CUUUUCUUUUUGGCAUAUCCGAUU	Cleavage
ghy-miRn19	c23664.graph_c1	unnamed protein product	3.5	1	23	UGGACUUUCUAGCAUGGUUGAUG	Cleavage
ghy-miRn19	c67524.graph_c0	unnamed protein product	3.5	409	432	CAUUUCUCUCCAUCAUAAUCGAUU	Cleavage
ghy-miRn19	c43513.graph_c0	B3 domain-containing transcription repressor VAL2-like	4	939	962	GCUGCUUCUCCAGGAAAGCCGGUU	Translation
ghy-miRn19	c48131.graph_c0	beta-D-xylosidase 2	4	351	374	GACUUUUCACCAGCAAAGUUGAUU	Cleavage
ghy-miRn19	c12528.graph_c1	DNA replication licensing factor MCM6	4	2553	2576	AUUUUCUUUUUAGCAUGGUCAAUU	Cleavage
ghy-miRn19	c11613.graph_c0	inositol-tetrakisphosphate 1-kinase 1-like	4	1022	1045	CAUCGAUCUUUGGCAUGGUUGAUU	Cleavage
ghy-miRn19	c39054.graph_c0	NEOXANTHIN-DEFICIENT 1 protein	4	2379	2402	AGUUUCUCUCCAACAUGGUCAAUU	Cleavage
ghy-miRn19	c48591.graph_c0	Pentatricopeptide repeat-containing protein	4	1825	1848	CCUUUAUCUCCACUAUGGUCGAUU	Cleavage
ghy-miRn19	c45044.graph_c0	Uncharacterized protein	4	1546	1569	CUGGGGUUUCUAGCAUACCUGAUU	Cleavage
ghy-miRn19	c43071.graph_c0	Uncharacterized protein	4	833	856	CUGCUAUUUCCGGCCUAGCUGAUU	Translation
ghy-miRn19	c46261.graph_c0	Uncharacterized protein	4	340	363	CUGAUUCAGUGACUGAUGUCUGUU	Cleavage
ghy-miRn19	c47625.graph_c0	unnamed protein product	4	4	24	CCGUUCACAAAACAACUCAUC	Cleavage
ghy-miRn19	c50628.graph_c0	unnamed protein product	4	691	714	UGGGUUUCUCCAGCGUUGCCGAAU	Cleavage
ghy-miRn19	c92195.graph_c0	unnamed protein product	4	242	265	UUCGUUUCUCUAGUAUAGCCAAUC	Cleavage
ghy-miRn19	c57152.graph_c0	WUSCHEL-related homeobox 9	4	988	1011	CCAGUCUCUCCAGCAUGGUGCAUU	Cleavage
ghy-miRn19	c36878.graph_c0	alpha,alpha-trehalose-phosphate synthase [UDP-forming] 6	4.5	1117	1140	AGGGUUUUUCCUGCAUAGCCCGUU	Cleavage
ghy-miRn19	c44805.graph_c0	AP2-like ethylene-responsive transcription factor AIL6	4.5	2039	2063	GCUGACUGAUUUAGCAUAGUCGAUU	Cleavage
ghy-miRn19	c49042.graph_c0	cleavage stimulating factor 64	4.5	1831	1855	UUCUUCUUUCUCAGCAUCGUCGAUU	Cleavage
ghy-miRn19	c39194.graph_c0	dehydration-responsive element-binding protein 1D	4.5	303	326	GAUUUCUUGCCAGCAUGGCCGAGG	Cleavage
ghy-miRn19	c37855.graph_c0	gag-pol fusion protein	4.5	1138	1162	ACAAACUCUUUAGCAGUAGCUGAUU	Cleavage
ghy-miRn19	c42502.graph_c0	galacturonosyltransferase 11	4.5	1734	1757	UACUUCUCUCCAGUAUGGGCUGUU	Cleavage
ghy-miRn19	c35871.graph_c0	hypothetical protein	4.5	275	298	AUUUUUUUUUUAGUAUAAUCGAUU	Cleavage
ghy-miRn19	c24411.graph_c0	LEAF RUST 10 DISEASE-RESISTANCE LOCUS RECEPTOR-LIKE PROTEIN KINASE-like 1.1	4.5	429	452	UCCAUUUCUGCAGCAUAGUCGCUA	Cleavage
ghy-miRn19	c40693.graph_c0	LRR receptor-like serine/threonine-protein kinase GSO1	4.5	3744	3767	CGAUGUUUACAGCAUGGGGAUGGU	Cleavage
ghy-miRn19	c25818.graph_c0	organic cation/carnitine transporter 4	4.5	1287	1309	UGCUAUA-AAUAUGGCCUGCAGUU	Cleavage
ghy-miRn19	c50200.graph_c0	pentatricopeptide repeat-containing protein	4.5	403	426	UCAUUCUCUCCUGCAUGUUUGAUU	Cleavage
ghy-miRn19	c88687.graph_c0	polygalacturonase	4.5	207	230	UAUGUCUUUUCAGCAUAGCUUUUU	Cleavage
ghy-miRn19	c39055.graph_c0	transmembrane emp24 domain-containing protein	4.5	517	540	UCUGUUUUUCAGGUAUAGCAGAUU	Cleavage
ghy-miRn19	c21382.graph_c0	Uncharacterized protein	4.5	744	767	AAUUUUAAAAAUUUUUGAGAUCCG	Cleavage
ghy-miRn19	c44718.graph_c0	unnamed protein product	4.5	1321	1344	UGCUGUUUACAGUACGAAAGUUAG	Cleavage
ghy-miRn19	c43929.graph_c0	unnamed protein product	4.5	3564	3587	UUUCUUUUUUUAGCAUAGCCGAAA	Cleavage
ghy-miRn19	c50883.graph_c0	enoyl-CoA delta isomerase 1	5	170	192	GCCG-CUCUCCACCGUGUCCGAUC	Cleavage
ghy-miRn19	c31079.graph_c0	ferric reductase, NAD binding domain-containing protein	5	759	782	GUUGUUACUGCAGCAGAGUUGAUU	Cleavage
ghy-miRn19	c46975.graph_c0	ferric reduction oxidase 8	5	410	433	GUCAUCUUUUUAGCAUGGACGUUU	Cleavage
ghy-miRn19	c37113.graph_c0	MDIS1-interacting receptor like kinase 1-like	5	457	479	ACCGUCUCUCCAGCA-AGUCAAUU	Cleavage
ghy-miRn19	c50469.graph_c0	misato homolog 1	5	7609	7632	ACCGUGACUGCGGCAUAGUCGAUG	Cleavage
ghy-miRn19	c45978.graph_c1	Pentatricopeptide repeat-containing protein	5	2363	2386	GCUGCUUCUCUGGCACAGUUGAUC	Cleavage
ghy-miRn19	c46709.graph_c0	Retrovirus-related Pol polyprotein from transposon TNT 1-94	5	21	43	ACCUUCUCUCCAGU-UACCCGAUU	Translation
ghy-miRn19	c49086.graph_c0	stromal processing peptidase	5	3727	3750	ACUGUUGCAUCGGCAUAGCCGGUA	Cleavage
ghy-miRn19	c47660.graph_c0	Uncharacterized protein	5	1897	1920	AAUGUCUUUCCAGGAUGAUUGAUU	Translation
ghy-miRn19	c49741.graph_c0	Uncharacterized protein	5	1593	1613	ACAGGAUGAAGCUUGCUACGA	Cleavage
ghy-miRn19	c50410.graph_c0	uncharacterized protein	5	6	29	UCCUUCUCUCUAGCAUUGCUAAUC	Cleavage
ghy-miRn19	c13057.graph_c0	unnamed protein product	5	7	30	UCCAUCUUUUCAGUGUACCCUAUU	Cleavage
ghy-miRn19	c38799.graph_c0	unnamed protein product	5	423	446	GCUGUGUCUCCGGUGAAGUUGAUU	Cleavage
ghy-miRn20	c47313.graph_c0	unnamed protein product	3	77	100	GCAUCCAUAGACCAAGCAGCCGUU	Cleavage
ghy-miRn20	c12424.graph_c0	cationic amino acid transporter 5	3.5	1437	1459	AUGUCCAU-GAUCGAGCAACUGCU	Cleavage
ghy-miRn20	c45362.graph_c0	PRC-barrel-like protein	3.5	573	596	ACCUUCAGUAAUUAAACAACCGCU	Cleavage
ghy-miRn20	c46086.graph_c0	Uncharacterized protein	3.5	1933	1956	AUCUUGAUAGAUUAAAGAACUGCU	Cleavage
ghy-miRn20	c7406.graph_c0	Uncharacterized protein	3.5	70	93	GCUUGUAUGGGUCAAACAACUUCU	Cleavage
ghy-miRn20	c47005.graph_c0	villin-1	3.5	2050	2073	GCUGUCCAAGUUGAUCAAGUUUCU	Cleavage
ghy-miRn20	c45265.graph_c1	auxilin-like protein 1	4	2713	2733	CUGUUGACAGAGCGAUUCGUG	Cleavage
ghy-miRn20	c45936.graph_c0	BTB/POZ domain-containing protein	4	1405	1428	AAUGCACAGAUGCUUCAGAGUGAA	Cleavage
ghy-miRn20	c49524.graph_c0	gamma-soluble NSF attachment protein	4	3308	3331	AUUUUUACAAAUCAAACAACAGCU	Cleavage
ghy-miRn20	c48580.graph_c0	homeobox protein LUMINIDEPENDENS	4	1285	1308	GCAAUCGAAGAGCAAACAACUGUU	Cleavage
ghy-miRn20	c14071.graph_c0	Retrovirus-related Pol polyprotein from transposon TNT 1-94	4	345	368	UUUUUCGUGGAUUAAAUGACCGUC	Cleavage
ghy-miRn20	c45291.graph_c0	tryptophan aminotransferase-related protein 2	4	4115	4138	GCAUCCAUGGAUUGAGCAAUCUCU	Cleavage
ghy-miRn20	c48408.graph_c0	ultraviolet-B receptor UVR8	4	2374	2398	UUCGUUUCGUUGUUCUAUAGUCAUU	Cleavage
ghy-miRn20	c44354.graph_c0	Uncharacterized protein	4	3066	3089	UCGUUCAUGUAUCAAACAACUCUU	Cleavage
ghy-miRn20	c47440.graph_c2	Uncharacterized protein	4	75	98	ACAAGCAUAGAUCAAUCAAAUGUU	Cleavage
ghy-miRn20	c30333.graph_c0	Uncharacterized protein	4	515	538	GCUUUCUUAGAUCAAACAAUGGCA	Cleavage
ghy-miRn20	c25755.graph_c0	Uncharacterized protein	4	11	34	AUCUUUGUUUGUCAAACAACUGCU	Cleavage
ghy-miRn20	c48914.graph_c0	Uncharacterized protein	4	917	940	CUGUUCGUGGAUCAAACGAUAGUU	Cleavage
ghy-miRn20	c40886.graph_c0	zinc finger CCCH domain-containing protein 62-like	4	95	118	AGAUGCGUAGAUCAAAAAUCCGUU	Cleavage
ghy-miRn20	c47039.graph_c0	Armadillo	4.5	1260	1285	CUAUUCAAAUGGAUCAAAUAAUUGCU	Cleavage
ghy-miRn20	c29240.graph_c0	B3 domain-containing protein	4.5	638	661	GUAUAUAUGGAACAAACAACUGUC	Cleavage
ghy-miRn20	c48878.graph_c1	callose synthase 5-like	4.5	735	755	GCUUGAUAGUCGAGCUGUUGA	Cleavage
ghy-miRn20	c35140.graph_c1	CCT domain-containing protein	4.5	503	526	CAAUUUGAAGAUCAAACAAUUUCU	Cleavage
ghy-miRn20	c43324.graph_c0	cysteine-rich repeat secretory protein 60-like	4.5	169	192	UUGUUCACAGAUCAAAUACUCGCC	Cleavage
ghy-miRn20	c48985.graph_c1	dof zinc finger protein DOF5.4	4.5	1232	1255	UCUCCUAUGUAAAUCUAUAUUUUU	Cleavage
ghy-miRn20	c48285.graph_c0	F-box associated domain, type 1	4.5	2314	2337	GCAUUUGUAGGUUGAACGAACGCU	Cleavage
ghy-miRn20	c51333.graph_c0	hypothetical protein	4.5	192	215	ACACUCAAGGAUCAAAUGACCAUU	Cleavage
ghy-miRn20	c45328.graph_c0	hypothetical protein	4.5	2359	2382	UGCCUGAAAUUUUGAUAAGUGUUU	Cleavage
ghy-miRn20	c54084.graph_c0	hypothetical protein	4.5	291	314	AAAUUCAAAAAUUGAAUGAUCGCU	Cleavage
ghy-miRn20	c43899.graph_c0	low-temperature-induced cysteine proteinase-like	4.5	519	540	GUAGUUCAUAAACUCAAAGAUG	Cleavage
ghy-miRn20	c40693.graph_c0	LRR receptor-like serine/threonine-protein kinase GSO1	4.5	3744	3767	CGAUGUUUACAGCAUGGGGAUGGU	Cleavage
ghy-miRn20	c41281.graph_c0	metal transporter Nramp6	4.5	787	810	UCAUUCGUAGGUCAAGAAACCCCU	Cleavage
ghy-miRn20	c48772.graph_c0	mitogen-activated protein kinase kinase kinase 17-like	4.5	75	98	ACAUACUUCGAUCAAAUAACAGUU	Cleavage
ghy-miRn20	c39269.graph_c0	MLO-like protein 13	4.5	185	208	ACAAUGAUAGAACAAAUAACUGCC	Cleavage
ghy-miRn20	c46381.graph_c0	Pentatricopeptide repeat-containing protein	4.5	1241	1264	AAGUUUAAGGAUCAAACAAGCGCC	Cleavage
ghy-miRn20	c49322.graph_c0	Pentatricopeptide repeat-containing protein	4.5	62	85	CCAAUCAUCGAUCGAUCAAUCGCC	Cleavage
ghy-miRn20	c48387.graph_c0	U-box domain-containing protein 34	4.5	1701	1724	GUAUUCGUAUAUUAGGCAACCUCU	Cleavage
ghy-miRn20	c45761.graph_c0	Uncharacterized protein	4.5	1207	1230	CGAUUCAGAAAUCAAAUAGCCUCU	Cleavage
ghy-miRn20	c44004.graph_c1	1-aminocyclopropane-1-carboxylate oxidase 3-like	5	24	47	ACUUCCAAAGAUCAAACAACCAAA	Cleavage
ghy-miRn20	c45194.graph_c0	chaperone protein dnaJ C76	5	294	317	CCAUUCGGAGAUCAAACAGGCGUA	Cleavage
ghy-miRn20	c42788.graph_c0	ER lumen protein-retaining receptor	5	1500	1523	AUAUUUAAAAAUCAAAUAACUACU	Cleavage
ghy-miRn20	c47396.graph_c0	formin-like protein 8	5	875	898	ACAUGCAUAAAUUAAAUAACAUCU	Cleavage
ghy-miRn20	c39202.graph_c0	hypothetical protein	5	862	885	UAAUUCAUGAAUUCAACAACCUCU	Translation
ghy-miRn20	c30331.graph_c0	myb-related protein 2-like	5	602	628	ACCUUCAGUGUAGGUCAAGCAACUGUU	Cleavage
ghy-miRn20	c39155.graph_c0	peptidyl-prolyl cis-trans isomerase FKBP17-1	5	467	490	ACUUUCAUUGAUCGAACUGCUGCG	Cleavage
ghy-miRn20	c50125.graph_c0	ribonuclease H-like domain, Reverse transcriptase, RNA-dependent DNA polymerase	5	4754	4777	GGAUUCUUAGAUCAGAUUAUUGUU	Cleavage
ghy-miRn20	c38411.graph_c0	RNA-directed DNA polymerase	5	335	358	ACAUGCAUGAAUCGAGUAUCCGUU	Cleavage
ghy-miRn20	c43837.graph_c0	Uncharacterized protein	5	225	248	ACACUCAAGGAUUAAAUGACCAUU	Cleavage
ghy-miRn21	c73704.graph_c0	MADS-box transcription factor 23	1.5	493	516	GCCCUUUUUAUCCCGACAUUCAUU	Cleavage
ghy-miRn21	c41351.graph_c0	CBL-interacting serine/threonine-protein kinase 14-like	3.5	1639	1662	UUAUAAUUUAGUCUGACGUGCAUU	Cleavage
ghy-miRn21	c50111.graph_c1	CLIP-associated protein	3.5	3702	3725	UAGUCUUUCGAAACUUGCGUCUUU	Cleavage
ghy-miRn21	c82624.graph_c0	nucleotidyltransferase, Ribonuclease H	3.5	115	138	AUAGGUUUUGUCCCGACGUUCAUC	Cleavage
ghy-miRn21	c43061.graph_c0	protein FAR1-RELATED SEQUENCE 4	3.5	1492	1512	AUCGUCGUAUAAUGAUUGAAA	Cleavage
ghy-miRn21	c35701.graph_c0	protein FAR1-RELATED SEQUENCE 9	3.5	1182	1205	AGGCGUUAUAUGUCGGCAUGCAUU	Cleavage
ghy-miRn21	c49869.graph_c0	ribonuclease H-like domain-containing protein	3.5	3529	3552	GCUCUUUUUGUUCUGAUAUGCUUU	Cleavage
ghy-miRn21	c31280.graph_c0	transmembrane ascorbate ferrireductase 4	3.5	522	545	AAGGGUUUUGCCUUGGCAUGUAUU	Cleavage
ghy-miRn21	c38129.graph_c0	unnamed protein product	3.5	886	909	UCUUCUUUUUUCUCGACGUCCAUU	Cleavage
ghy-miRn21	c20357.graph_c0	glutamic acid-rich protein-like	4	227	250	CCUGCUUUUAGACCCACAUGCAUU	Translation
ghy-miRn21	c49058.graph_c0	hypothetical protein	4	1763	1786	ACAGCUUUUAUGUUGCCAUGCAUU	Cleavage
ghy-miRn21	c50206.graph_c0	Retrovirus-related Pol polyprotein from transposon TNT 1-94	4	27	50	AGUAAUUUUAUCCCGGCAUCAGUU	Cleavage
ghy-miRn21	c44862.graph_c0	RNA pseudouridine synthase 6	4	150	173	CCUGUUGCUAUUCCGACAUUCAUU	Cleavage
ghy-miRn21	c48460.graph_c0	tRNA dimethylallyltransferase 9	4	450	473	CCCCGUUUGAUCAUGGUAUGCAUU	Cleavage
ghy-miRn21	c40993.graph_c0	UDP-glucose:glycoprotein glucosyltransferase	4	873	896	UCUUAUUUAAUUCUGAUAUGGAUU	Cleavage
ghy-miRn21	c50024.graph_c0	Uncharacterized protein	4	4071	4094	ACCCGUUUCAUCUCGUUAUGCGUU	Cleavage
ghy-miRn21	c36925.graph_c0	Uncharacterized protein	4	1171	1194	CUUGAUUUUGUUUCAACGUGUAUU	Translation
ghy-miRn21	c41161.graph_c0	unnamed protein product	4	535	558	AAAUAUUUCAUCUUGGCAAGCAUU	Cleavage
ghy-miRn21	c44379.graph_c0	BEL1-like homeodomain protein 8	4.5	216	236	AAGUUCAUGCAGGAAGUUUCA	Translation
ghy-miRn21	c49114.graph_c2	ferrochelatase-2	4.5	893	916	UUCGGUUCUUUCUUGACAUGUAUC	Cleavage
ghy-miRn21	c48340.graph_c1	hypothetical protein	4.5	3228	3251	ACCAAUUUUUUCAUGACAUACAUU	Cleavage
ghy-miRn21	c43013.graph_c0	leucine-rich repeat protein 2-like	4.5	88	111	GCCCAUUCUGACCCGACGUCCAUU	Cleavage
ghy-miRn21	c42489.graph_c0	protein CHROMATIN REMODELING 4-like	4.5	2197	2217	AGUUUCUUAUAGGGAAGCAUA	Cleavage
ghy-miRn21	c47994.graph_c0	protein FAR1-RELATED SEQUENCE 6-like	4.5	2057	2077	CAAUGGAGGGCUCGAGGGAAA	Translation
ghy-miRn21	c48557.graph_c0	receptor-like protein kinase HAIKU2	4.5	2995	3018	UAAAAUUUUGUCUCAAGAUGUAUU	Translation
ghy-miRn21	c48557.graph_c0	receptor-like protein kinase HAIKU2	4.5	2995	3018	UAAAAUUUUGUCUCAAGAUGUAUU	Translation
ghy-miRn21	c38571.graph_c0	Uncharacterized protein	4.5	381	404	UUCUAGUUUCUUUCGACAUGAAUU	Cleavage
ghy-miRn21	c63617.graph_c0	disease resistance protein RGA2-like	5	75	98	UUGGAUUUGGUAGCGACAUGUAUU	Cleavage
ghy-miRn21	c45575.graph_c0	exocyst complex component SEC10b-like	5	1868	1891	GUGGAUGGCUUGUUUGAUAGUUUU	Cleavage
ghy-miRn21	c57374.graph_c0	fasciclin-like arabinogalactan protein 19	5	586	609	GUUAUUUGUUAAGUCGGUUGUCGU	Cleavage
ghy-miRn21	c44097.graph_c0	gag-pol polyprotein	5	1036	1059	CACCAUUUUGUUCCGAUGUGUACG	Cleavage
ghy-miRn21	c41250.graph_c0	G-type lectin S-receptor-like serine/threonine-protein kinase	5	2556	2579	UACGAAUCUAAUUCGACAUGCAUG	Cleavage
ghy-miRn21	c42218.graph_c0	guanine nucleotide-binding protein subunit gamma 3-like	5	627	650	AGUGAUUUUAUCUCGUCCUGUAUA	Cleavage
ghy-miRn21	c5456.graph_c0	hypothetical protein	5	73	97	UUCUGUUAUGUCCACGACAUGCGUU	Translation
ghy-miRn21	c44000.graph_c0	hypothetical protein	5	623	645	AAAGAUUUUGUUUUGACAU-CAUU	Cleavage
ghy-miRn21	c38883.graph_c0	kinesin-like protein KIN-12E	5	359	382	UCUGUUUUCAUCUCCAUAUCCAUU	Translation
ghy-miRn21	c50390.graph_c1	midasin	5	1295	1318	AUGAGUUUGCAGACCUUUGGAUGA	Cleavage
ghy-miRn21	c45874.graph_c0	mitogen-activated protein (MAP) kinase kinase kinase, MLK1/MLK2/MLK4	5	789	811	UUUGGUUUCAUCCUGAU-UGCAUU	Cleavage
ghy-miRn21	c47102.graph_c2	NETWORKED 4A protein	5	821	846	UUUUGUUUUCCAUCCCGAUAUGUCUU	Cleavage
ghy-miRn21	c48842.graph_c0	protein FAR1-RELATED SEQUENCE 6-like	5	2892	2915	UACGAUUUUCUUCCGGCAGCCAUU	Cleavage
ghy-miRn21	c48245.graph_c1	protein FLX-like 3	5	3313	3336	ACCGUUUUCAUCUCCACGCGCAUU	Translation
ghy-miRn21	c49406.graph_c0	ribonuclease H-like domain-containing protein	5	1808	1831	UACCAUUUUGUUGUGAUAUGUAUG	Cleavage
ghy-miRn21	c30162.graph_c0	thylakoid membrane protein TERC	5	1131	1154	UUUGGUUUUAUCCUCAUAUGAAUC	Translation
ghy-miRn21	c36948.graph_c0	Uncharacterized protein	5	1943	1966	CUCUAUUUUAUCUUAACUUGCAUA	Translation
ghy-miRn21	c49567.graph_c1	unnamed protein product	5	1829	1852	ACUGGGUUUAUUCCGGCCAGCAUU	Cleavage
ghy-miRn22	c47528.graph_c0	VAN3-binding protein-like	1	1364	1387	UGUAUCAAACUAACCAUCAUAGUU	Cleavage
ghy-miRn22	c47810.graph_c0	E3 ubiquitin-protein ligase ORTHRUS 2-like	2.5	877	897	AGCUCAAAGGUGGUGGGGUGA	Cleavage
ghy-miRn22	c39920.graph_c0	unnamed protein product	2.5	90	113	UGACCAACAAUCAUGACAUCAUUU	Cleavage
ghy-miRn22	c83129.graph_c0	hypothetical protein	3	250	270	GGAUGGUGAGCGAGCUGUCUU	Cleavage
ghy-miRn22	c53863.graph_c0	RNA-directed DNA polymerase	3	256	276	AAUUAAAAAGUGGUGGAGAAA	Cleavage
ghy-miRn22	c46660.graph_c0	Uncharacterized protein	3	1334	1354	GGUUGUAUGGUGGUGGAGUAA	Cleavage
ghy-miRn22	c90056.graph_c0	unnamed protein product	3	124	144	AAAUGGAAAGUGGUGGAGUGU	Cleavage
ghy-miRn22	c45431.graph_c0	extensin-3-like	3.5	698	718	CCAGAUUCAGGGGUUUGUUGG	Cleavage
ghy-miRn22	c48944.graph_c0	glycine-rich domain-containing protein 1	3.5	1011	1034	GGUCACUAACGGACCUUUGGUUGU	Cleavage
ghy-miRn22	c43459.graph_c0	hypothetical protein	3.5	1528	1548	UGAUGAAGGGUGGUGGGGUGG	Cleavage
ghy-miRn22	c21484.graph_c0	lipase-like PAD4	3.5	1689	1709	CUUUGAUAAGUGGUGGAGAGA	Cleavage
ghy-miRn22	c24353.graph_c0	mitochondrial protein	3.5	585	605	AGGUGAGAAGUGGUGGAUUAG	Cleavage
ghy-miRn22	c39209.graph_c0	Pentatricopeptide repeat-containing protein	3.5	574	594	GAAUGGUGAGUGGUGGGGUAA	Cleavage
ghy-miRn22	c38647.graph_c0	protein FAM32A-like	3.5	636	656	AUGUGAAGGCUGGUGGAGUAA	Cleavage
ghy-miRn22	c29609.graph_c0	BAG family molecular chaperone regulator 6	4	2352	2372	AGCUUAAUAUGGAGAAGCAUA	Cleavage
ghy-miRn22	c37882.graph_c0	BTB/POZ domain-containing protein	4	1756	1776	CAAUGGAGGGUGGUGGAGUUA	Cleavage
ghy-miRn22	c44874.graph_c0	CASP-like protein 2B1	4	1858	1878	AAUUUAGAGGUGGUGGAGAAA	Cleavage
ghy-miRn22	c51157.graph_c0	contains similarity to reverse transcriptase	4	306	326	GUUUGAAUGGUGGUGCAGUGA	Cleavage
ghy-miRn22	c55853.graph_c0	endo-1,3(4)-beta-glucanase ARB_01444	4	128	148	GUGAGGGAAGUGGUGGAGUGG	Cleavage
ghy-miRn22	c41685.graph_c0	F-actin-capping protein subunit beta	4	1017	1037	AUCGGAGGAGUGGUGGGGCAA	Cleavage
ghy-miRn22	c36334.graph_c0	Glycoside hydrolase, catalytic domain-containing protein	4	1297	1317	UUCUUGGAAGUGGUGGAAUGA	Cleavage
ghy-miRn22	c50007.graph_c0	G-type lectin S-receptor-like serine/threonine-protein kinase	4	1023	1043	UUAUGGAGAGAGGUGGAGUGA	Translation
ghy-miRn22	c22824.graph_c0	hypothetical protein	4	413	433	CAACCUAUGGAAAGGAUCUUG	Cleavage
ghy-miRn22	c48397.graph_c0	hypothetical protein	4	656	676	CCCGGAAAAAUGGUGGGGUAU	Cleavage
ghy-miRn22	c88517.graph_c0	hypothetical protein	4	3	23	GAAUGGUAAGUUGUGGAGUAA	Translation
ghy-miRn22	c47271.graph_c0	nucleotidyltransferase, Ribonuclease H	4	2783	2803	UUCUGACAACUUGUGGAGUAA	Translation
ghy-miRn22	c47710.graph_c0	Pentatricopeptide repeat-containing protein	4	2942	2962	UCCUGUAGGGUUUAAGGGGAU	Cleavage
ghy-miRn22	c25274.graph_c0	phosphatase 2C (PP2C)-like protein	4	1300	1320	AAAUCCCAUCAUCAAGAUUCU	Cleavage
ghy-miRn22	c15778.graph_c0	Retrovirus-related Pol polyprotein from transposon RE1	4	1576	1599	CGAUUUAUGAGAUAGGUGGCAGUU	Cleavage
ghy-miRn22	c27146.graph_c0	RNA-directed DNA polymerase	4	1141	1161	UGUUUAAUAGUGGUGGAGAAA	Cleavage
ghy-miRn22	c44047.graph_c0	SUF system FeS cluster assembly	4	832	852	UGGUGGAGAGUGGUGGAGAGA	Cleavage
ghy-miRn22	c44345.graph_c0	two-component response regulator-like PRR73	4	1282	1305	AUUAAUUGUGUUUUCAGCAGUCGA	Cleavage
ghy-miRn22	c42892.graph_c0	Uncharacterized protein	4	3369	3393	AAUCCUCCUAACACUCGUAGACAUU	Cleavage
ghy-miRn22	c45546.graph_c0	Uncharacterized protein	4	1206	1226	GGUUGGGAGGUGGUGGAGGAG	Cleavage
ghy-miRn22	c44717.graph_c0	unnamed protein product	4	376	396	CUUUGGAAGGAGGUGGAGUAC	Translation
ghy-miRn22	c48037.graph_c0	ATP-dependent DNA helicase Q-like 4A	4.5	2457	2477	GGUUCAAAAGCAGUGGAGUAA	Translation
ghy-miRn22	c45528.graph_c0	BES1/BZR1 homolog protein 2-like	4.5	2264	2284	AGUUCGAGAGUGGUGGAUUGA	Cleavage
ghy-miRn22	c49846.graph_c0	cell division control protein 48 homolog C	4.5	2020	2043	GCGAAUUGGCAGUGCGGACGAUAU	Cleavage
ghy-miRn22	c45805.graph_c2	concanavalin A-like lectin/glucanase domain-containing protein	4.5	1454	1474	AGCAGGAAGGUGUUGGGGUAG	Cleavage
ghy-miRn22	c39139.graph_c2	dihydroorotate dehydrogenase (quinone)l	4.5	1313	1333	CAAAGGAAAGUGGUGGACUGA	Cleavage
ghy-miRn22	c17840.graph_c0	ethylene-responsive transcription factor 1	4.5	1033	1053	AGUUGAAGUGUGGCGGAGUAG	Cleavage
ghy-miRn22	c35325.graph_c0	Gelsolin domain-containing protein	4.5	624	644	GCCAUAAAAGUGGUGGGGUGG	Cleavage
ghy-miRn22	c37154.graph_c0	glucan endo-1,3-beta-glucosidase 13-like	4.5	586	606	GGUGGAAAAGUGGUGGAAUUA	Cleavage
ghy-miRn22	c40802.graph_c0	hypothetical protein	4.5	449	469	GGCAGAAGAAUGGUGGAUUAA	Cleavage
ghy-miRn22	c17955.graph_c0	hypothetical protein	4.5	93	113	GGAGGGAAAGUGGUGGGGUGU	Cleavage
ghy-miRn22	c17955.graph_c0	hypothetical protein	4.5	93	113	GGAGGGAAAGUGGUGGGGUGU	Cleavage
ghy-miRn22	c65164.graph_c0	hypothetical protein	4.5	148	168	AGGUGAAGAGUGGUGGAAUUA	Cleavage
ghy-miRn22	c35196.graph_c0	hypothetical protein	4.5	784	804	UGGUGGGGAGUGGUGGAGAAG	Cleavage
ghy-miRn22	c47345.graph_c0	hypothetical protein	4.5	1417	1437	UAUUGAAGGGUGGUGGGGUUG	Cleavage
ghy-miRn22	c31036.graph_c0	hypothetical protein	4.5	873	893	ACGUGAAGAGAGGUGGAGUGU	Translation
ghy-miRn22	c30462.graph_c0	lipoxygenase 6	4.5	2232	2255	CGGAAUGAGUCGUGGUGGCCCAAA	Translation
ghy-miRn22	c44929.graph_c0	NLR family CARD domain-containing protein 3	4.5	351	371	AUGUGGAAAUUGGUGGAGAAA	Cleavage
ghy-miRn22	c49224.graph_c0	protein argonaute 1	4.5	1705	1725	AUUUGAGAGGUGGAGGUGUAA	Cleavage
ghy-miRn22	c54675.graph_c0	RNA-directed DNA polymerase	4.5	201	222	GGCGGAAGAGUUGGUGGAGUAA	Translation
ghy-miRn22	c48413.graph_c0	tropinone reductase homolog	4.5	130	150	GGCUGCGCGGUGGUGGAGGAA	Cleavage
ghy-miRn22	c43735.graph_c0	Uncharacterized protein	4.5	961	981	UUUUGAAAAGGGGAGGAGUGG	Translation
ghy-miRn22	c24882.graph_c1	Uncharacterized protein	4.5	1436	1456	AUUUGAGAAAUGGUGGAAUGA	Cleavage
ghy-miRn22	c39760.graph_c0	Uncharacterized protein	4.5	776	796	UCUUGAAGAAUGGUGGAUUAG	Cleavage
ghy-miRn22	c22422.graph_c0	Uncharacterized protein	4.5	577	597	UGCUAAAAAAUGGAGGGGUAA	Cleavage
ghy-miRn22	c37884.graph_c0	uncharacterized protein	4.5	1994	2014	GGGUGGAAGGUGGUGGUGUGG	Cleavage
ghy-miRn22	c11734.graph_c0	unnamed protein product	4.5	433	453	UCAAGGGAAGUGGUGGAGAAA	Cleavage
ghy-miRn22	c54662.graph_c0	ABC transporter B family member 19-like	5	257	277	CGGUGAAAAGUGGGGGAGUUG	Cleavage
ghy-miRn22	c11620.graph_c0	Beta-hydroxyacyl-(acyl-carrier-protein) dehydratase	5	236	256	AGAUGGAGAGUGGAGGACUAA	Cleavage
ghy-miRn22	c83886.graph_c0	copia protein	5	256	276	AGUUUAGAAGUGAUGGAGUCA	Cleavage
ghy-miRn22	c41322.graph_c0	DCC family protein	5	161	181	GGCGGCGAAGUGGUGGAUUGG	Cleavage
ghy-miRn22	c32936.graph_c0	disease resistance protein RPS2-like	5	2303	2323	AGGAUCAAAGUGGUGGGGUGA	Cleavage
ghy-miRn22	c42186.graph_c0	glutamyl-tRNA(Gln) amidotransferase subunit A	5	519	539	GGUUAAGAAGUUGUGGCGUAA	Translation
ghy-miRn22	c47320.graph_c0	hypothetical protein	5	1709	1730	GGCUGCAAAAGUGGUGGAAUCA	Cleavage
ghy-miRn22	c39623.graph_c0	hypothetical protein	5	903	923	CGUUGAGGUGUUGUGGAGUGA	Translation
ghy-miRn22	c28536.graph_c0	hypothetical protein	5	337	357	GGGGGAAGGGUAGUGGAGUAG	Translation
ghy-miRn22	c49534.graph_c0	Integrase	5	599	619	UUAGUAAGGGUGGUGGAGUAU	Cleavage
ghy-miRn22	c48910.graph_c1	LRR receptor-like serine/threonine-protein kinase	5	5212	5235	AAUGAGCGAGCCUUUGUCAAUUCC	Cleavage
ghy-miRn22	c49897.graph_c1	mediator of RNA polymerase II transcription subunit 23	5	4242	4262	GGUGGUGAAGUGGUGGAGGAG	Cleavage
ghy-miRn22	c39486.graph_c0	nucleotidyltransferase, Ribonuclease H	5	995	1018	UUGUUUUUGGUAGUGGGGGUAACG	Cleavage
ghy-miRn22	c50050.graph_c0	Pentatricopeptide repeat-containing protein	5	1043	1066	CUCGUUUACGCUCGCAGAGGCUGA	Cleavage
ghy-miRn22	c22178.graph_c0	Pentatricopeptide repeat-containing protein	5	1991	2012	UGUUGAGCAAGUGGUGGUGUAG	Cleavage
ghy-miRn22	c48658.graph_c0	Retrovirus-related Pol polyprotein from transposon TNT 1-94	5	849	869	GGGUGAUGAACCCUUGUCUGA	Translation
ghy-miRn22	c43278.graph_c1	RNA-directed DNA polymerase	5	495	515	GAUGUGAAAGUGGUGGAGAAA	Cleavage
ghy-miRn22	c79798.graph_c0	SUPPRESSOR OF GAMMA RESPONSE 1	5	19	39	GAUUGAAAUCUGGUGGAGUGC	Cleavage
ghy-miRn22	c35742.graph_c0	U11/U12 small nuclear ribonucleoprotein 31 kDa protein	5	468	488	AGUUGUGGUGUGGUGGAGUAU	Cleavage
ghy-miRn22	c43922.graph_c0	Uncharacterized protein	5	36	56	UUUCGGUGUCAUCAAGAUUAG	Cleavage
ghy-miRn22	c66689.graph_c0	Uncharacterized protein	5	143	163	GGCGGCGGGGUGGUGGAGUGU	Cleavage
ghy-miRn22	c48048.graph_c0	Uncharacterized protein	5	2770	2790	CGUUGAUGAUUGGUGGAGUGU	Cleavage
ghy-miRn22	c50400.graph_c0	Uncharacterized protein	5	6089	6109	UAAAUGAUGAUGGAAGCUUCA	Cleavage
ghy-miRn22	c50012.graph_c1	unnamed protein product	5	1701	1721	GGUAGAAAGAUGGUGGAUUAA	Cleavage
ghy-miRn22	c41407.graph_c0	unnamed protein product	5	1202	1222	GGGUGGAGAGUGGUGGGGUUC	Cleavage
ghy-miRn22	c45420.graph_c1	unnamed protein product	5	2146	2166	UUAGAAGAGGUGGUGGAGUAU	Cleavage
ghy-miRn22	c6218.graph_c0	WUSCHEL-related homeobox 11-like	5	100	120	UGUUGAAAGCUGGUCGGGUGA	Cleavage
ghy-miRn22	c38117.graph_c0	WUSCHEL-related homeobox 2	5	274	294	GGUUUGGAGGUGGUGCAGUGA	Cleavage
ghy-miRn23	c45864.graph_c0	hypothetical protein	0.5	723	746	GUUGUAGUUCAAUAGUUAAGUAGU	Cleavage
ghy-miRn23	c42302.graph_c0	hypothetical protein	1.5	1426	1447	UAUGUUGUUUAUAACAUUUCAU	Cleavage
ghy-miRn23	c49876.graph_c0	hypothetical protein	1.5	283	304	GUCAUUGUUUAUAUCAUUUCAA	Cleavage
ghy-miRn23	c33603.graph_c0	Leucine-rich repeat-containing protein	1.5	88	109	CAGAUUGUUUAUCACAUUUCAA	Translation
ghy-miRn23	c48434.graph_c0	extra-large guanine nucleotide-binding protein 1-like	2.5	233	254	UAUAAUAUUUAUAAUAUUUCAA	Cleavage
ghy-miRn23	c49355.graph_c0	hypothetical protein	2.5	1114	1135	ACAAUUGUGUAUAGUGUUUCAA	Cleavage
ghy-miRn23	c25394.graph_c0	hypothetical protein	2.5	1086	1107	GUCAAUGAUUGUAACAUUUCAA	Cleavage
ghy-miRn23	c48679.graph_c0	zinc finger MYM-type protein 1	2.5	3861	3881	GUCUUCUUUUAGAGGAACACA	Cleavage
ghy-miRn23	c42391.graph_c0	DEAD-box ATP-dependent RNA helicase 29	3	462	485	GUUGGUGGUGAUAGUAUGGAAAGU	Cleavage
ghy-miRn23	c40668.graph_c1	methionine aminopeptidase 1B	3	1218	1239	UUAAUUGUUUAUAAUAGUUCAC	Cleavage
ghy-miRn23	c51137.graph_c0	mitochondrial outer membrane protein	3	136	157	AAAAUUGUUUGCAACAUUUUGA	Translation
ghy-miRn23	c48669.graph_c0	Pentatricopeptide repeat-containing protein	3	4316	4339	AUCUCGACCCGAACCGAACCGAAC	Cleavage
ghy-miRn23	c48669.graph_c0	Pentatricopeptide repeat-containing protein	3	4316	4339	AUCUCGACCCGAACCGAACCGAAC	Cleavage
ghy-miRn23	c21418.graph_c0	Pentatricopeptide repeat-containing protein	3	391	412	GACAUUUGUUAUGACAUUUCGA	Cleavage
ghy-miRn23	c32336.graph_c0	unnamed protein product	3	14	35	AACGUUGUUUACAACAUUUCAU	Translation
ghy-miRn23	c43913.graph_c0	unnamed protein product	3	34	55	AGAAUUGUCUAUAAUAGUUCAA	Cleavage
ghy-miRn23	c46688.graph_c0	ABC transporter A family member 7-like	3.5	1759	1779	AUGCAUCUUCAUCAUGAUUCU	Cleavage
ghy-miRn23	c44517.graph_c0	ATP-dependent RNA helicase DEAH12	3.5	3815	3836	GGGAUUGUUAAUGACGUUUCGG	Cleavage
ghy-miRn23	c43939.graph_c0	autophagy-related protein 18g	3.5	2992	3013	AUGUAUGUUUAUGGUAUUUCAA	Cleavage
ghy-miRn23	c46453.graph_c0	beta-galactosidase 17	3.5	2823	2844	GACACUGUUUAUGACAUUUUGU	Cleavage
ghy-miRn23	c46732.graph_c0	inactive receptor kinase	3.5	1359	1380	GGCAUUGUUGAUGAUAUUUCGG	Cleavage
ghy-miRn23	c44159.graph_c0	kinesin-like protein KIN-14F	3.5	1015	1036	CAAAUUGUUUGUAAUAUUACAU	Cleavage
ghy-miRn23	c44237.graph_c0	lysine-specific demethylase JMJ16	3.5	174	197	GUGCUGUUAAUAGCACGAAUGAUU	Translation
ghy-miRn23	c46693.graph_c0	mitogen-activated protein kinase 9-like	3.5	2863	2884	AUCGUUGAAUGUAACGUUUCAA	Cleavage
ghy-miRn23	c47823.graph_c0	mitogen-activated protein kinase kinase kinase YODA-like	3.5	2412	2433	GCCUUUGUUUGUCACAUUUUAA	Translation
ghy-miRn23	c47330.graph_c0	MLO-like protein 4	3.5	931	952	UUUAUUUUAUGUAACAUUUUAG	Cleavage
ghy-miRn23	c47531.graph_c0	Pentatricopeptide repeat-containing protein	3.5	673	694	ACCAUUUUUUAUAAUGUUACAA	Cleavage
ghy-miRn23	c47531.graph_c0	Pentatricopeptide repeat-containing protein	3.5	673	694	ACCAUUUUUUAUAAUGUUACAA	Cleavage
ghy-miRn23	c49292.graph_c0	Pentatricopeptide repeat-containing protein	3.5	956	977	AUAUGUGUUUAUGGUAUUUCAA	Cleavage
ghy-miRn23	c46821.graph_c0	Pentatricopeptide repeat-containing protein	3.5	1218	1239	GUUAUUAGCUAUAACAUUUUAA	Cleavage
ghy-miRn23	c45833.graph_c0	Pentatricopeptide repeat-containing protein	3.5	2517	2538	GUGGUUAUUUAUAAUGUUUUGA	Cleavage
ghy-miRn23	c49127.graph_c0	Phytochromes A protein	3.5	3253	3274	CUUAUUGUUGUUAACAUUUCAG	Cleavage
ghy-miRn23	c48882.graph_c0	protein phosphatase 2C 27	3.5	1720	1740	UUCAU-GUUUAUAACAUUUUAU	Cleavage
ghy-miRn23	c43678.graph_c0	ribosomal RNA-processing protein 8	3.5	534	555	GUGAUUGCUUGUGACAUGUCAA	Cleavage
ghy-miRn23	c48866.graph_c1	ribulose-1,5 bisphosphate carboxylase/oxygenase large subunit N-methyltransferase	3.5	1280	1303	AAACUUCAGGUGGUUUAUGGUGAU	Cleavage
ghy-miRn23	c25806.graph_c0	Uncharacterized protein	3.5	914	937	UUCUAACGACUAAAACAGGACUUU	Cleavage
ghy-miRn23	c49460.graph_c0	Uncharacterized protein	3.5	230	253	GUCUAGGAACUAAAACAAAACUUU	Cleavage
ghy-miRn23	c50398.graph_c0	uncharacterized protein	3.5	3641	3664	UAUGUAAAAUGUGGGCCCUACAUU	Cleavage
ghy-miRn23	c45168.graph_c0	unnamed protein product	3.5	3063	3084	GUUUCUGUUUAUAGCAUUUUGA	Cleavage
ghy-miRn23	c46284.graph_c0	BTB and TAZ domain protein 4	4	1458	1476	GUUCCACCUGAGGCUGUUC	Cleavage
ghy-miRn23	c49500.graph_c0	cellulose synthase-like protein E1	4	1580	1601	GUCAUUUUUUGUAAUAUUUUCA	Cleavage
[truncated: 6,955 more rows]

## Sheet: Table S6
Supplementary Table S6. Expression patterns of 607 differentially expressed target genes of differentially expressed miRNAs in gerbera
[truncated: 609 more rows]

[truncated: 4 more sheets: Table S7, Table S8-Section 1-miRNA, Table S8-Section 2-target genes, Table S9]
